# Supplementary material for: Candidatus Dactylopiibacterium carminicum, a Nitrogen-Fixing Symbiont of Dactylopius Cochineal Insects (Hemiptera: Coccoidea: Dactylopiidae)
Source: Oxford University Press journal article supplement (doi:10.1093/gbe/evx156), 2017-08-22
Supplement: evx156_supptable_s1.xlsx [file evx156_supptable_s1.xlsx]

## Sheet: Supplementary_Table_1
Supplementary table S1. Single copy orthologous genes of Rhodocyclacea core genome
id_uniref	Annotation
UniRef100_UPI00037BA893	cob(I)yrinic acid a,c-diamide adenosyltransferase n=1
UniRef100_UPI00035F1A65	hypothetical protein n=1
UniRef100_UPI00036AA0A2	cell division protein ZapD n=1
UniRef100_UPI00039B418D	histidine kinase n=1
UniRef100_H0PX28	Rhodanese-like protein n=2
UniRef100_UPI000361441E	quinolinate synthetase n=1
UniRef100_N6YQE9	Peptide deformylase n=1
UniRef100_UPI000365871D	ABC transporter ATP-binding protein n=1
UniRef100_UPI000363219B	RNA polymerase sigma-54 factor n=1
UniRef100_UPI0003604F4C	RNA polymerase subunit sigma-54 n=1
UniRef100_UPI00036F55B0	hypothetical protein n=1
UniRef100_UPI00035F9730	HPr kinase/phosphorylase n=1
UniRef100_UPI00035E05E2	tRNA 2-thiocytidine biosynthesis protein TtcA n=1
UniRef100_UPI00036FF088	hypothetical protein n=1
UniRef100_UPI000476AC67	16S rRNA (cytosine(967)-C(5))-methyltransferase n=1
UniRef100_UPI00037D9864	ribosome silencing factor RsfS n=1
UniRef100_C4KCZ7	Uncharacterized protein n=2
UniRef100_UPI000476D28A	LPS export ABC transporter permease LptG n=1
UniRef100_UPI000373CCD9	acetolactate synthase n=1
UniRef100_UPI0004849D68	ketol-acid reductoisomerase n=1
UniRef100_UPI0006846661	CDP-diacylglycerol--serine O-phosphatidyltransferase n=1
UniRef100_UPI00036F110E	2-isopropylmalate synthase n=1
UniRef100_UPI00036B5C67	hypothetical protein n=1
UniRef100_UPI00036B4AD4	hypothetical protein n=1
UniRef100_UPI0003656622	nucleoside diphosphate kinase n=1
UniRef100_UPI00036AC4BE	23S rRNA (adenine(2503)-C(2))-methyltransferase RlmN n=1
UniRef100_UPI00036A259E	hypothetical protein n=1
UniRef100_UPI00036E29B3	4-hydroxy-3-methylbut-2-en-1-yl diphosphate synthase n=1
UniRef100_UPI00037C405B	RNA-binding protein Hfq n=1
UniRef100_A0A0J8T5F8	GTPase HflX n=1
UniRef100_H0PXG0	Band 7 family protein n=1
UniRef100_G8QI63	Protein HflC n=1
UniRef100_C7RU28	Uncharacterized protein n=1
UniRef100_UPI000363429C	adenylosuccinate synthase n=1
UniRef100_UPI00068785B1	23S rRNA methyltransferase n=1
UniRef100_UPI0002F934C7	hypothetical protein n=1
UniRef100_UPI0003756CF3	tRNA (guanine-N(7)-)-methyltransferase n=1
UniRef100_UPI000476671D	thiamine biosynthesis protein ThiS n=1
UniRef100_UPI00036D1A3C	hypothetical protein n=1
UniRef100_UPI0003672F20	ATP-dependent Clp protease ATP-binding subunit ClpA n=1
UniRef100_A0A0M0FRW1	Uncharacterized protein n=1
UniRef100_UPI000364B00D	DNA helicase n=1
UniRef100_A0A0P9LKA1	Endoribonuclease L-PSP n=4
UniRef100_UPI00035C902E	iron-sulfur cluster insertion protein ErpA n=1
UniRef100_UPI00037AB315	ferredoxin n=1
UniRef100_UPI000366E760	hypothetical protein n=1
UniRef100_UPI000364DF85	hypothetical protein n=1
UniRef100_A0A0J8T6R5	Heat-inducible transcription repressor HrcA n=2
UniRef100_UPI000372A9E9	molecular chaperone HtpG n=1
UniRef100_UPI0003824C7F	acetyl-CoA carboxylase subunit beta n=1
UniRef100_UPI00039C3DF3	rod shape-determining protein n=1
UniRef100_A1K1T8	Cell shape-determining protein MreC n=1
UniRef100_UPI00037FF89B	hypothetical protein n=1
UniRef100_UPI000688FB7E	ADP-ribosylglycohydrolase n=1
UniRef100_UPI00036A8978	hypothetical protein n=1
UniRef100_UPI00035C6BA7	lipoyl synthase n=1
UniRef100_UPI000361A123	coproporphyrinogen III oxidase n=1
UniRef100_UPI00037BFDB5	TIGR00730 family Rossman fold protein n=1
UniRef100_UPI000477611D	uroporphyrinogen decarboxylase n=1
UniRef100_S9ZUU2	Hydrolase n=1
UniRef100_UPI00037B2479	glycine cleavage system protein H n=1
UniRef100_UPI0005272772	segregation and condensation protein A n=1
UniRef100_UPI00035C972B	ribosome maturation factor n=1
UniRef100_UPI00036E3BA3	transcription termination/antitermination protein NusA n=1
UniRef100_A0A0M0FQA6	Ribosome-binding factor A n=1
UniRef100_UPI00037C50C1	4-hydroxy-3-methylbut-2-enyl diphosphate reductase n=1
UniRef100_UPI00036DA986	hypothetical protein n=1
UniRef100_UPI00036F5233	signal peptidase II n=1
UniRef100_UPI0003740E54	isoleucine--tRNA ligase n=1
UniRef100_UPI000380FAF1	histidinol-phosphate transaminase n=1
UniRef100_UPI00037314B3	1-(5-phosphoribosyl)-5-[(5-phosphoribosylamino)methylideneamino] imidazole-4-carboxamide isomerase n=1
UniRef100_UPI00037A8265	imidazole glycerol phosphate synthase subunit HisF n=1
UniRef100_UPI000371E2FC	phosphoribosyl-ATP pyrophosphatase n=1
UniRef100_A0A0M7E875	Sec-independent protein translocase protein TatA n=2
UniRef100_UPI00036EFE76	hypothetical protein n=1
UniRef100_UPI00035C4216	DNA repair protein RadA n=1
UniRef100_UPI000477A90B	peptide chain release factor 2 n=1
UniRef100_UPI0003824400	fumarate hydratase n=1
UniRef100_UPI000477ECA6	50S ribosomal protein L28 n=1
UniRef100_D5CNM5	50S ribosomal protein L33 n=1
UniRef100_A1K3D3	50S ribosomal protein L9 n=1
UniRef100_UPI000374B4EA	30S ribosomal protein S18 n=1
UniRef100_A1K3D0	30S ribosomal protein S6 n=1
UniRef100_UPI00037BB94C	hypothetical protein n=1
UniRef100_UPI000371AFC3	transcriptional repressor n=1
UniRef100_A0A0M0FPZ1	Ribonuclease H n=1
UniRef100_UPI00037C41A6	hypothetical protein n=1
UniRef100_UPI000378B2AC	hypothetical protein n=1
UniRef100_UPI000380A165	thioredoxin reductase n=1
UniRef100_Q5NZ70	2-dehydro-3-deoxyphosphooctonate aldolase n=1
UniRef100_UPI000366E005	CTP synthetase n=1
UniRef100_UPI00036F9932	hypothetical protein n=1
UniRef100_UPI00037543E5	tRNA (guanine(37)-N(1))-methyltransferase n=1
UniRef100_UPI0004263A2C	adenosylhomocysteinase n=1
UniRef100_UPI00036960D6	dihydroxy-acid dehydratase n=1
UniRef100_UPI00037366AA	prolipoprotein diacylglyceryl transferase n=1
UniRef100_A1K5W3	Histone deacetylase family protein n=1
UniRef100_UPI0003A19B1D	elongation factor P n=1
UniRef100_UPI000366DA49	ribonuclease n=1
UniRef100_UPI00036FC1C4	poly(3-hydroxyalkanoate) synthetase n=1
UniRef100_UPI00036668F9	RNase adaptor protein RapZ n=1
UniRef100_UPI000381A824	hypothetical protein n=1
UniRef100_UPI00037CBC24	bifunctional demethylmenaquinone methyltransferase/2-methoxy-6-polyprenyl-1,4-benzoquinol methylase n=1
UniRef100_UPI0003815E63	hypothetical protein n=1
UniRef100_UPI0005241CDE	histidine kinase n=1
UniRef100_A0A0K1J196	N6-adenine-specific methylase n=1
UniRef100_UPI00035C7031	pantetheine-phosphate adenylyltransferase n=1
UniRef100_A0A0K1J1E0	Ferredoxin protein n=1
UniRef100_UPI0006CE6E1B	rRNA methylase n=1
UniRef100_UPI0003707537	aspartate--tRNA ligase n=1
UniRef100_UPI00046D24B1	MULTISPECIES: membrane protein n=1
UniRef100_UPI00039FB478	type II secretion system protein F n=1
UniRef100_UPI000368BDF0	GTP-binding protein n=1
UniRef100_UPI00037812F5	delta-aminolevulinic acid dehydratase n=1
UniRef100_UPI00037A13D8	two-component sensor histidine kinase n=1
UniRef100_T1XBF2	Two component transcriptional regulator, winged helix family n=1
UniRef100_UPI00035DB1D3	Fe(2+)-trafficking protein n=1
UniRef100_UPI00037F4811	oligoribonuclease n=1
UniRef100_UPI00037AE4AB	hypothetical protein n=1
UniRef100_UPI000369CA9B	3-methyl-2-oxobutanoate hydroxymethyltransferase n=1
UniRef100_UPI000365EE53	transcriptional regulator n=1
UniRef100_UPI000372D606	23S rRNA (uracil(1939)-C(5))-methyltransferase n=1
UniRef100_UPI00035E7FA1	cell division protein FtsA n=1
UniRef100_Q5P6Z5	Putative lipid II flippase FtsW n=1
UniRef100_A0A0J8Q889	Phospho-N-acetylmuramoyl-pentapeptide-transferase n=2
UniRef100_UPI00058B99EB	nucleoside-diphosphate sugar epimerase n=1
UniRef100_N6YB85	50S ribosomal protein L17 n=1
UniRef100_UPI000378C0FF	30S ribosomal protein S4 n=1
UniRef100_UPI00036BF3BE	30S ribosomal protein S11 n=1
UniRef100_UPI0003657221	30S ribosomal protein S13 n=1
UniRef100_UPI0003A53512	preprotein translocase subunit SecY n=1
UniRef100_UPI00036BDF3D	50S ribosomal protein L15 n=1
UniRef100_UPI00037DE141	30S ribosomal protein S5 n=1
UniRef100_UPI000377420E	30S ribosomal protein S8 n=1
UniRef100_UPI00037A7429	50S ribosomal protein L5 n=1
UniRef100_G8QNW8	50S ribosomal protein L14 n=1
UniRef100_UPI00037B539B	30S ribosomal protein S17 n=1
UniRef100_UPI000377869F	50S ribosomal protein L29 n=1
UniRef100_UPI0003799463	30S ribosomal protein S3 n=1
UniRef100_UPI00036AC239	50S ribosomal protein L22 n=1
UniRef100_UPI0003740B46	30S ribosomal protein S19 n=1
UniRef100_UPI00047804A3	50S ribosomal protein L2 n=1
UniRef100_UPI00037F1694	50S ribosomal protein L23 n=1
UniRef100_UPI0003780FB8	30S ribosomal protein S10 n=1
UniRef100_UPI00037A8701	30S ribosomal protein S7 n=1
UniRef100_UPI00035F243B	30S ribosomal protein S12 n=1
UniRef100_UPI000380FB9D	DNA-directed RNA polymerase subunit beta n=1
UniRef100_UPI0003A31254	50S ribosomal protein L10 n=1
UniRef100_UPI000369EB77	50S ribosomal protein L1 n=1
UniRef100_UPI000734128B	50S ribosomal protein L11 n=1
UniRef100_UPI00036334F3	transcription termination/antitermination protein NusG n=1
UniRef100_A1KB40	Preprotein translocase, SecE subunit n=1
UniRef100_UPI00036DFBAC	hypothetical protein n=1
UniRef100_A1K5A5	Phosphate import ATP-binding protein PstB n=1
UniRef100_UPI00035F1A13	adenylosuccinate lyase n=1
UniRef100_UPI000686FC22	transcriptional regulator n=1
UniRef100_UPI00037365E1	hypothetical protein n=1
UniRef100_N6YD55	FixH family protein n=1
UniRef100_UPI000362EC49	hypothetical protein n=1
UniRef100_UPI0003814DE3	peptidase S41 n=1
UniRef100_A0A0M0FRI8	Cbb3-type cytochrome c oxidase subunit I n=1
UniRef100_A0A011N1H7	Cytochrome oxidase maturation protein, cbb3-type n=1
UniRef100_UPI00036F8757	GTPase Era n=1
UniRef100_UPI00036B2956	hypothetical protein n=1
UniRef100_UPI00036DCDF2	S26 family signal peptidase n=1
UniRef100_UPI00037DC235	elongation factor 4 n=1
UniRef100_UPI0003693CB5	hypothetical protein n=1
UniRef100_UPI0003700F49	L-aspartate oxidase n=1
UniRef100_UPI00036845C3	acyl carrier protein n=1
UniRef100_Q5P0D7	Phosphate acyltransferase n=1
UniRef100_UPI00045EADEB	50S ribosomal protein L32 n=1
UniRef100_UPI0003816CB9	hypothetical protein n=1
UniRef100_UPI0004801A06	YajQ family cyclic di-GMP-binding protein n=1
UniRef100_A1VNU7	Binding-protein-dependent transport systems inner membrane component n=1
UniRef100_UPI00035D92AD	homoserine dehydrogenase n=1
UniRef100_UPI000369C385	hypothetical protein n=1
UniRef100_UPI000475A909	phosphate starvation protein PhoH n=1
UniRef100_A1K7L5	Putative lipoprotein precusor n=1
UniRef100_A0A0C5JMX5	ABC transporter permease n=1
UniRef100_N6XCW5	ABC transporter n=1
UniRef100_UPI000684D1D1	metal-dependent hydrolase n=1
UniRef100_H0PX99	BolA family protein/stress-induced morphogen n=1
UniRef100_UPI00047605FC	ATP phosphoribosyltransferase n=1
UniRef100_UPI00037D2D3E	histidinol dehydrogenase n=1
UniRef100_UPI00036A65AA	hypothetical protein n=1
UniRef100_UPI000524933C	amino-acid N-acetyltransferase n=1
UniRef100_UPI000360958E	dihydrolipoamide dehydrogenase n=1
UniRef100_UPI00037AAD4C	excinuclease ABC subunit B n=1
UniRef100_UPI0003828B1A	aspartate aminotransferase n=1
UniRef100_UPI0005267E9A	chromosome partitioning protein ParB n=1
UniRef100_UPI00036A64EB	cobyric acid synthase CobQ n=1
UniRef100_UPI0003752FC0	16S rRNA methyltransferase G n=1
UniRef100_UPI00036B44CD	chromosomal replication initiation protein DnaA n=1
UniRef100_UPI000382510C	DNA polymerase III subunit beta n=1
UniRef100_UPI0003816F57	DNA gyrase subunit B n=1
UniRef100_UPI00035D5153	cysteine--tRNA ligase n=1
UniRef100_UPI0004898C23	peptidylprolyl isomerase n=1
UniRef100_UPI00035C2E3E	hypothetical protein n=1
UniRef100_UPI0004774522	hypothetical protein n=1
UniRef100_UPI000375D1F5	hypothetical protein n=1
UniRef100_UPI000375196A	GTP-binding protein n=1
UniRef100_UPI00037555AA	cysteine synthase B n=1
UniRef100_UPI00036E0EA8	glycine--tRNA ligase subunit alpha n=1
UniRef100_A0A011NRA5	Lipopolysaccharide export system protein LptA n=1
UniRef100_UPI0003626178	hypothetical protein n=1
UniRef100_UPI00036F15AF	hypothetical protein n=1
UniRef100_UPI00037559E4	Fe-S cluster assembly scaffold IscU n=1
UniRef100_UPI00035DC124	hypothetical protein n=1
UniRef100_UPI0003771C6F	hypothetical protein n=1
UniRef100_H0PTZ7	Fe-S assembly protein n=1
UniRef100_UPI0004844E6A	Co2+/Mg2+ efflux protein ApaG n=1
UniRef100_UPI0005278E37	translation initiation factor IF-3 n=1
UniRef100_UPI00037F67B3	50S ribosomal protein L35 n=1
UniRef100_UPI0003615158	integration host factor subunit alpha n=1
UniRef100_UPI0003669FCB	hypothetical protein n=1
UniRef100_UPI00037311E1	hypothetical protein n=1
UniRef100_UPI000380D996	30S ribosomal protein S15 n=1
UniRef100_T0AW09	Nitrogen regulatory protein P-II 1 n=1
UniRef100_UPI00036A2FC8	lipid II flippase MurJ n=1
UniRef100_UPI00037E1E4B	ornithine carbamoyltransferase n=1
UniRef100_UPI0006857AFC	guanosine-3'''',5''''-bis(diphosphate) 3''''-pyrophosphohydrolase n=1
UniRef100_UPI0003682A3D	DNA-directed RNA polymerase subunit omega n=1
UniRef100_UPI00035EDD02	guanylate kinase n=1
UniRef100_UPI00037BB9AA	hypothetical protein n=1
UniRef100_A1K2Y6	Probable transcriptional regulatory protein azo0574 n=1
UniRef100_UPI0003778BD9	hypothetical protein n=1
UniRef100_UPI000362CACC	protein tolQ n=1
UniRef100_UPI000363F2E3	hypothetical protein n=1
UniRef100_UPI000378E2F8	hypothetical protein n=1
UniRef100_UPI0003795C94	radical SAM protein n=1
UniRef100_UPI0003662966	heme ABC transporter ATP-binding protein n=1
UniRef100_UPI00037D98F7	hypothetical protein n=1
UniRef100_N6Y488	Tfp pilus assembly protein PilO n=1
UniRef100_UPI00037B6169	hypothetical protein n=1
UniRef100_H0PYG6	Serine protease n=1
UniRef100_UPI00036D3D7B	lysine--tRNA ligase n=1
UniRef100_UPI000381F07E	tRNA guanosine(34) transglycosylase Tgt n=1
UniRef100_A0A0K6IQ43	Protein translocase subunit yajC n=1
UniRef100_UPI00047596EC	preprotein translocase subunit SecD n=1
UniRef100_UPI0003787F79	hypothetical protein n=1
UniRef100_UPI0003763769	hypothetical protein n=1
UniRef100_UPI000363A8F4	nucleotide exchange factor GrpE n=1
UniRef100_UPI00036DA50F	molecular chaperone DnaJ n=1
UniRef100_UPI00037B00F5	30S ribosomal protein S2 n=1
UniRef100_UPI00036C268E	UMP kinase n=1
UniRef100_UPI000475AFE9	ribosome recycling factor n=1
UniRef100_A0A0K1J5T6	Putative outer membrane protein n=1
UniRef100_A0A0M0FP59	3-hydroxyacyl-[acyl-carrier-protein] dehydratase FabZ n=1
UniRef100_UPI00037F11D6	glutamyl-tRNA reductase n=1
UniRef100_UPI00068603AB	peptidylprolyl isomerase n=1
UniRef100_UPI0003823C73	transcriptional regulator NrdR n=1
UniRef100_UPI00037F5ED1	transcription elongation factor GreB n=1
UniRef100_UPI0003720765	hypothetical protein n=1
UniRef100_UPI00035CB85C	aspartate carbamoyltransferase n=1
UniRef100_UPI000378D6C8	thymidylate synthase n=1
UniRef100_UPI0003802578	hypothetical protein n=1
UniRef100_UPI000374765F	hypothetical protein n=1
UniRef100_UPI00052444C9	esterase n=1
UniRef100_UPI00035D1B6C	GTP-binding protein YchF n=1
UniRef100_UPI000366A258	4-(cytidine 5''''-diphospho)-2-C-methyl-D-erythritol kinase n=1
UniRef100_UPI00037684E3	50S ribosomal protein L25/general stress protein Ctc n=1
UniRef100_UPI00037F8DB2	aminoacyl-tRNA hydrolase n=1
UniRef100_UPI00038220C4	argininosuccinate lyase n=1
UniRef100_UPI00036D30CE	orotate phosphoribosyltransferase n=1
UniRef100_A0A0K1JBU6	Exodeoxyribonuclease III n=1
UniRef100_UPI00036579FE	NUDIX domain-containing protein n=1
UniRef100_UPI00035C324E	NADH:ubiquinone oxidoreductase subunit M n=1
UniRef100_N6XKB4	NADH-ubiquinone oxidoreductase subunit L n=1
UniRef100_UPI00037C52F5	NADH-quinone oxidoreductase subunit K n=1
UniRef100_UPI0003062AA1	NADH dehydrogenase subunit I n=1
UniRef100_A0A0J8Q9U6	NADH-quinone oxidoreductase subunit H n=2
UniRef100_UPI00037031DD	hypothetical protein n=1
UniRef100_A1K5B1	NADH-quinone oxidoreductase subunit D n=1
UniRef100_UPI00035E9059	phosphate ABC transporter ATP-binding protein n=1
UniRef100_UPI000367A67C	glutamate--tRNA ligase n=1
UniRef100_UPI00037DB094	energy-dependent translational throttle protein EttA n=1
UniRef100_A0A084DL19	Membrane protein n=1
UniRef100_UPI0005BDEE23	sulfurtransferase tusA n=1
UniRef100_UPI00036AB816	hypothetical protein n=1
UniRef100_UPI00036DF519	hypothetical protein n=1
UniRef100_UPI000366163B	GMP synthetase n=1
UniRef100_UPI00036D819A	RnfH family protein n=1
UniRef100_UPI0003631416	SsrA-binding protein n=1
UniRef100_UPI000370EF78	twitching motility protein PilT n=1
UniRef100_UPI00037D8789	twitching motility protein PilT n=1
UniRef100_UPI000367AA26	RNA pyrophosphohydrolase n=1
UniRef100_UPI000362A988	hypothetical protein n=1
UniRef100_UPI00035FCA14	hypothetical protein n=1
UniRef100_UPI00036CDC64	50S ribosomal protein L13 n=1
UniRef100_UPI000370AEFF	30S ribosomal protein S9 n=1
UniRef100_UPI00037EE1F0	50S ribosomal protein L27 n=1
UniRef100_UPI00037CBE43	hypothetical protein n=1
UniRef100_UPI00037BA23C	methionine aminopeptidase n=1
UniRef100_UPI00038277A2	argininosuccinate synthase n=1
UniRef100_UPI0003767559	hypothetical protein n=1
UniRef100_A0A0A0DK07	Superoxide dismutase n=1
UniRef100_UPI00035E3DA3	adenylate kinase n=1
UniRef100_UPI0003768C87	carbamoyl phosphate synthase large subunit n=1
UniRef100_UPI00036FECEB	transcription elongation factor GreA n=1
UniRef100_UPI0004772BE5	23S rRNA methyltransferase n=1
UniRef100_A0A0K1J5G0	Electron transport complex subunit A n=1
UniRef100_UPI00035F7869	electron transporter RnfB n=1
UniRef100_UPI000363C905	riboflavin synthase subunit alpha n=1
UniRef100_UPI00039D836A	ATP-dependent Clp protease proteolytic subunit n=1
UniRef100_A0A0J8QBJ9	Serine acetyltransferase n=2
UniRef100_UPI00035C4C71	inositol monophosphatase n=1
UniRef100_A0A0T2ZBR1	Peptidase C39 n=1
UniRef100_UPI0003666A1F	hypothetical protein n=1
UniRef100_F5RB60	SspA protein n=2
UniRef100_UPI00036C78A1	stringent starvation protein B n=1
UniRef100_UPI0006878E22	30S ribosomal protein S1 n=1
UniRef100_UPI00037036C6	integration host factor subunit beta n=1
UniRef100_UPI000368137A	hypothetical protein n=1
UniRef100_UPI00067D6AE5	recombination factor protein RarA n=1
UniRef100_A0A0J8Q918	tRNA-specific 2-thiouridylase MnmA n=2
UniRef100_UPI000375ABD9	NUDIX hydrolase n=1
UniRef100_UPI000360C4A8	branched chain amino acid aminotransferase n=1
UniRef100_UPI00038099B2	thiol reductase thioredoxin n=1
UniRef100_UPI0003795FD6	50S ribosomal protein L31 n=1
UniRef100_UPI000377565E	succinate--CoA ligase subunit beta n=1
UniRef100_D9SGU8	Squalene synthase HpnD n=1
UniRef100_UPI00036A39AA	acetylglutamate kinase n=1
UniRef100_UPI00035FE45E	hypothetical protein n=1
UniRef100_UPI00036A9370	deoxycytidine triphosphate deaminase n=1
UniRef100_UPI00037968D2	NAD dependent epimerase/dehydratase n=1
UniRef100_A0A0G3ESL0	Sulfurtransferase n=1
UniRef100_C7RRJ1	Protein-L-isoaspartate(D-aspartate) O-methyltransferase n=2
UniRef100_UPI0003630CBD	F0F1 ATP synthase subunit epsilon n=1
UniRef100_UPI00039997F5	ATP synthase subunit beta n=1
UniRef100_UPI00035C8D8F	ATP synthase subunit alpha n=1
UniRef100_UPI0003786CC9	hypothetical protein n=1
UniRef100_UPI000379F645	hypothetical protein n=1
UniRef100_UPI000475508E	phosphoglycerate kinase n=1
UniRef100_UPI00036A35B7	hypothetical protein n=1
UniRef100_N6Z1L6	Protein CyaY n=1
UniRef100_UPI0003653B38	DNA topoisomerase IV subunit B n=1
UniRef100_A0A0C5JBZ8	ADP-ribose pyrophosphatase n=1
UniRef100_UPI00037830AC	rhodanese-like domain-containing protein n=1
UniRef100_H0PXZ4	Glutaredoxin n=2
UniRef100_A0A0K6IWS7	Glutaredoxin, GrxC family n=2
UniRef100_A0A0C3I218	Protein-export protein SecB n=3
UniRef100_UPI000688D271	ubiquinone biosynthesis regulatory protein kinase UbiB n=1
UniRef100_UPI000477DC2D	glutamate synthase n=1
UniRef100_UPI00035C7B12	radical SAM protein n=1
UniRef100_UPI00037CF7C5	hypothetical protein n=1
UniRef100_A0A0K1J0W8	N-acetyl-anhydromuranmyl-L-alanine amidase n=1
UniRef100_UPI00036229D6	bifunctional ornithine acetyltransferase/N-acetylglutamate synthase n=1
UniRef100_A0A0C3MK95	Ubiquinone biosynthesis O-methyltransferase n=3
UniRef100_UPI00036C2376	undecaprenyl-diphosphatase n=1
UniRef100_UPI0005559D67	tryptophan synthase subunit alpha n=1
UniRef100_UPI000477D714	N-(5''''-phosphoribosyl)anthranilate isomerase n=1
UniRef100_UPI00035EE0BA	aspartate-semialdehyde dehydrogenase n=1
UniRef100_UPI0003822C89	3-isopropylmalate dehydrogenase n=1
UniRef100_UPI00037979C6	3-isopropylmalate dehydratase small subunit n=1
UniRef100_UPI000365EC4B	hypothetical protein n=1
UniRef100_UPI0004088816	2,3,4,5-tetrahydropyridine-2,6-dicarboxylate N-succinyltransferase n=1
UniRef100_UPI00035FAB75	ribosomal protein L3 N(5)-glutamine methyltransferase n=1
UniRef100_UPI000370B493	signal recognition particle-docking protein FtsY n=1
UniRef100_Q1H4A4	[SSU ribosomal protein S18P]-alanine acetyltransferase n=1
UniRef100_A0A0G3BIV4	Probable intracellular septation protein A n=1
UniRef100_A0A0R0DXR1	Cell division protein BolA n=1
UniRef100_UPI0003646942	hypothetical protein n=1
UniRef100_N6YQ98	Enoyl-[acyl-carrier-protein] reductase [NADH] n=1
UniRef100_UPI00036AAA3F	hypothetical protein n=1
UniRef100_UPI0003619BCD	glutamine amidotransferase n=1
UniRef100_UPI00036A9EE3	hypothetical protein n=1
UniRef100_UPI000477E2AE	type II citrate synthase n=1
UniRef100_UPI000369FD93	hypothetical protein n=1
UniRef100_UPI000378B9AD	succinate dehydrogenase iron-sulfur subunit n=1
UniRef100_UPI000361EF39	succinate dehydrogenase flavoprotein subunit n=1
UniRef100_UPI000367CD93	hypothetical protein n=1
UniRef100_UPI00036A7FBE	hypothetical protein n=1
UniRef100_UPI00037EF0B1	hypothetical protein n=1
UniRef100_UPI000363C6AD	malate dehydrogenase n=1
UniRef100_UPI000382977B	RNA polymerase sigma factor RpoD n=1
UniRef100_UPI0003660776	dimethylallyladenosine tRNA methylthiotransferase n=1
UniRef100_UPI00036481F5	phosphate starvation protein PhoH n=1
UniRef100_D5CNW6	Molybdenum cofactor synthesis domain protein n=1
UniRef100_UPI0003A6F9CA	phosphoheptose isomerase n=1
UniRef100_UPI0003752AF5	nitrogen regulatory protein P-II 1 n=1
UniRef100_UPI0003802AF0	hypothetical protein n=1
UniRef100_UPI00039CBA01	heme ABC transporter permease n=1
UniRef100_UPI00037BE50A	cytochrome C biogenesis protein CcmE n=1
UniRef100_UPI00037D59AA	hypothetical protein n=1
UniRef100_UPI00037EA0D0	hypothetical protein n=1
UniRef100_UPI00036113AD	excinuclease ABC subunit C n=1
UniRef100_UPI000371FAD5	CDP-diacylglycerol--glycerol-3-phosphate 3-phosphatidyltransferase n=1
UniRef100_UPI00036DC61D	phospho-2-dehydro-3-deoxyheptonate aldolase n=1
UniRef100_UPI000375D801	camphor resistance protein CrcB n=1
UniRef100_UPI000382CCEA	glutamate-1-semialdehyde 2,1-aminomutase n=1
UniRef100_UPI0006885DB7	chemotaxis protein CheY n=1
UniRef100_UPI00037CD9ED	two-component system response regulator n=1
UniRef100_UPI0003665FDF	hypothetical protein n=1
UniRef100_UPI000381FF83	phosphoribosylamine--glycine ligase n=1
UniRef100_UPI000369ADBE	homoserine O-acetyltransferase n=1
UniRef100_UPI00037371DC	hypothetical protein n=1
UniRef100_UPI0003816013	hypothetical protein n=1
UniRef100_UPI000376F5F6	hypothetical protein n=1
UniRef100_UPI00036A7401	phosphoadenosine phosphosulfate reductase n=1
