# Supplementary material for: Candidatus Dactylopiibacterium carminicum, a Nitrogen-Fixing Symbiont of Dactylopius Cochineal Insects (Hemiptera: Coccoidea: Dactylopiidae)
Source: Oxford University Press journal article supplement (doi:10.1093/gbe/evx156), 2017-08-22
Supplement: evx156_supptable_s2.xlsx [file evx156_supptable_s2.xlsx]

## Sheet: Dactylopiibacterium_carminicum.
Supplementary table S2. Functional annotation products of CDS from Dactylopiibacterium genome from D. coccus (NFE1).
contig_id	feature_id	location	start	stop	strand	function	figfam	nucleotide_sequence	aa_sequence
NODE_10088_length_10141_cov_6.41682_ID_21063	fig|857335.5.peg.1	NODE_10088_length_10141_cov_6.41682_ID_21063_1282_158	1282	158	-	D-alanyl-D-alanine carboxypeptidase (EC 3.4.16.4)	FIG00561498	atgattcgccgcctgctctccagtatcgcccttgtcctgccactttccgtgcttgccgcccaacctgcggcgcccgcagtggaggctcgcagcttcattctcatcgatggccagagcaaccagacactggttgctggcaacgccgacatgagaatcgagcctgcctcactgaccaagctgatgaccgcttacctgaccttcaagtcgctgcgcgaaggccagctcaaactagaccagatgctcacggtttcgcgcgaagcacagagccgtgaaggctcgcgcatgttcgtcgatgcccgcgtaccggtcagcgtggacgatttgatcaagggtgtgatcgtacagtcgggcaacgatgcctgcgtggtgcttgccgaggcgctcgctggcagcgagcag…	MIRRLLSSIALVLPLSVLAAQPAAPAVEARSFILIDGQSNQTLVAGNADMRIEPASLTKLMTAYLTFKSLREGQLKLDQMLTVSREAQSREGSRMFVDARVPVSVDDLIKGVIVQSGNDACVVLAEALAGSEQGFVQLMNREAQRLGLANTHYLDSTGLTGEGQYTTAEDLAKLAQAIIRDFPEYYPIYSMKSFSYNNIKQDNRNLLLYRDAEVDGLKTGHTSTAGYNLVSSTKRDGRRLIAVVTGTTSMEARARESAKLLNWGTSVWETPRLFTAGQEVRNLPVYKGQTNNVRVGVANDHYLTIPRGAAAALVQEITLPTHLVAPLTAGQQVGSLRVRDGDTVLAEYPLAVLDEVQQGSWWRRLIDTIRLWFA
NODE_10088_length_10141_cov_6.41682_ID_21063	fig|857335.5.peg.2	NODE_10088_length_10141_cov_6.41682_ID_21063_1531_1917	1531	1917	+	T1SS associated transglutaminase-like cysteine proteinase LapP		gtggatgtaggcacacgcagggggcgacgtttcggcgaggcatggcgttggctgggcgcggtggcgctggccttctttgccgtgggcgccgggctggccagcgtcgacctcgagcgcatgcgcgggcaactgcagaagcgtttcggtacccgacctctgccggtgttcgataactggcgtggattgctgggggcatccggagccctgcccgaaaggcggaagctggatcaggtgaatggcttcttcaaccgcaatgtgcgattccaggacgacatcgtggtgtggcagctggccgattactgggccacgcccctggaattcatcggtcagggcgcggctttcggacgcggcgccatcggtggcgcacatggtgctgggctactatga	MDVGTRRGRRFGEAWRWLGAVALAFFAVGAGLASVDLERMRGQLQKRFGTRPLPVFDNWRGLLGASGALPERRKLDQVNGFFNRNVRFQDDIVVWQLADYWATPLEFIGQGAAFGRGAIGGAHGAGLL
NODE_10088_length_10141_cov_6.41682_ID_21063	fig|857335.5.peg.3	NODE_10088_length_10141_cov_6.41682_ID_21063_1940_2080	1940	2080	+	hypothetical protein		gtgctggacaacctgcggtccgacatcctgccggcttcgcagcgcccggacttgacgcctgtgttcagcttcaacgctgagggcgtctggactgccggcagcagtggtgccggcgctccggtagagcgcctgtcgcgctag	MLDNLRSDILPASQRPDLTPVFSFNAEGVWTAGSSGAGAPVERLSR
NODE_10088_length_10141_cov_6.41682_ID_21063	fig|857335.5.peg.4	NODE_10088_length_10141_cov_6.41682_ID_21063_2163_4088	2163	4088	+	diguanylate cyclase/phosphodiesterase (GGDEF & EAL domains) with PAS/PAC sensor(s)	FIG00561534	atgtccttactgaaacgtctttggttacgcgtgtttgcggtgatgctggtggcgctgtgcgccagtctgctgctgcacgtgatgagcgcacgtgattacctgcgccagcagttgtacgcgcagtcggcagatggcgcggcatcgctggcgctgtcgatgtcgcagcagcggggagacccggcaatggcggagttgctggtcagtgcgttgttcgactccgggcacttcgagcgcatcgtgttccgcgatgtgaatggtgcggttaaggtggcgcgggagacaggcgctccctcaccggatgtgcctgcctggttccgcaacgctgcgtcgcttgaaggcgcgcctggcacggcgctggtgacggacggctggcggcaacttggcggcgtggaggtgacg…	MSLLKRLWLRVFAVMLVALCASLLLHVMSARDYLRQQLYAQSADGAASLALSMSQQRGDPAMAELLVSALFDSGHFERIVFRDVNGAVKVARETGAPSPDVPAWFRNAASLEGAPGTALVTDGWRQLGGVEVTASARYAYRALWQGALRQALMLLVMGVALCVLLVLLLRWAAHPLKAIVSQASAIGQRRFELLPELSVPELRVVGRAMNGMVARVQAMFAEQAARIETLRTEVGRDPLTQLANRGFFLGSLRETLGDEEAAAGGVLIVVRVLDLLGLNRRIGRERTDTLIQTCAGLLSKQLPTDLPGALAGRLNGAEFGILLPGQGQAEAEAVCRQLLEGFDRLYRQEYADREPVAALAWTTYRHGEAPADVLLRVDAALMRAETSQPPLASANTEQV…
NODE_10088_length_10141_cov_6.41682_ID_21063	fig|857335.5.peg.5	NODE_10088_length_10141_cov_6.41682_ID_21063_4524_4066	4524	4066	-	hypothetical protein		atggactatctcgcgcatctggccacggctgtgctggtctggctgactgcgggttttctgccaataccctggcgtgcattgctgcgtgcgcttgcgctgctgcacgctgcctgtctgggcatcagcgcactgatgccgatcttcccctatgcagtggatgaccacacgcgcgcgttgagcgcactcacgctgctgatgctgacggcactgccactggtgatggcggccatgcactacatcatcgagcgcagtcacgaacggcgattgctggccacgctgatgatcgccgcctggcttgtattcagcctgccgctcaagttgctggcccatgcgttgctcattcagacgctctcgcctctgatcatgcccttgctattcatcgccggaggtccggcgctg…	MDYLAHLATAVLVWLTAGFLPIPWRALLRALALLHAACLGISALMPIFPYAVDDHTRALSALTLLMLTALPLVMAAMHYIIERSHERRLLATLMIAAWLVFSLPLKLLAHALLIQTLSPLIMPLLFIAGGPALDILVVTALYAWAVSWRHGP
NODE_10088_length_10141_cov_6.41682_ID_21063	fig|857335.5.peg.6	NODE_10088_length_10141_cov_6.41682_ID_21063_4845_4576	4845	4576	-	hypothetical protein		atgagcgccgccgaagaacagaccctgcagatagtcaccaccgcagtatcgcgtccgccaggattccggcaacggctgcgcgccctgctaaaagggcgtgctgccaacacggcctacgcattgctgatggccgcagcattgagcgtattgctgcagatgctgcgaccgctgatcaaggttttctggctgcagagcctgagcgccggcgtggcctggctacgcctggaagacgtggccgtcaccggcctcaacttgttgctgccgcaatag	MSAAEEQTLQIVTTAVSRPPGFRQRLRALLKGRAANTAYALLMAAALSVLLQMLRPLIKVFWLQSLSAGVAWLRLEDVAVTGLNLLLPQ
NODE_10088_length_10141_cov_6.41682_ID_21063	fig|857335.5.peg.7	NODE_10088_length_10141_cov_6.41682_ID_21063_5189_4842	5189	4842	-	hypothetical protein		atgatcaaggccgcgttattggtatccggccgcctggaaatcggcgaaggctgccatgtgataggcgatctgcgcgcagggcgcggcatcatcatcggtcgcaacgtagtgatcgagggcgccgtgtattccgacggcagcatcagcattggcgcctgctgccggattgttggcccgatcgtggcccgcaatcagatcacactcggcacgcagggatgggtgggcagccccatcgaaccggccacgatgcttgcggaacagatcaggatctatgaaggcagcgtcgtgcacggcagtgtgattgcttatcgacaaggtgaagtggtcgacgaacggaacccaggatga	MIKAALLVSGRLEIGEGCHVIGDLRAGRGIIIGRNVVIEGAVYSDGSISIGACCRIVGPIVARNQITLGTQGWVGSPIEPATMLAEQIRIYEGSVVHGSVIAYRQGEVVDERNPG
NODE_10088_length_10141_cov_6.41682_ID_21063	fig|857335.5.peg.8	NODE_10088_length_10141_cov_6.41682_ID_21063_5913_5431	5913	5431	-	hypothetical protein		atgaaccaggcgcaaggcatgatgatcttcatcggcatctgcagcgtctgcgcgctcctgccctggctgcccgcattgcgtaccctctcgcggcaagctacgccaccgccgccaggcaaccgcttgcttggcgcggatgtccgtgtcggtatgtttcgccagatgatcagtgagcagttcgccacgctactggccctggcacgggatggcggaccattgcgcggtgccaacgaaaagggacgtcccttcatcgtgctcggcttcaataatcatctcagcgaacaactcccccccagcgcccgccggctgcgcagcctcgtccttgccaccggtcatctggacatccccggggaactgatatgcgaccgcgagattttcgccgaaggccgcatcaacatc…	MNQAQGMMIFIGICSVCALLPWLPALRTLSRQATPPPPGNRLLGADVRVGMFRQMISEQFATLLALARDGGPLRGANEKGRPFIVLGFNNHLSEQLPPSARRLRSLVLATGHLDIPGELICDREIFAEGRINIAHNAIVKGALSHRDIALGARAHYPMGS
NODE_10088_length_10141_cov_6.41682_ID_21063	fig|857335.5.peg.9	NODE_10088_length_10141_cov_6.41682_ID_21063_7364_5910	7364	5910	-	Glycosyltransferase (EC 2.4.1.-)		atgccctggaacatcactcatctctggaggggggttgccctgctcggcctgttgctggccagcatggctcatggcgcggagaatgctcggctgcaattgcagctcgatgcccggctggatagtctgatcgcggagcaatccgctccctatgaactcccgtcggcagcttctggcataccgctggtacacacacccgaacaggtagtcgctgcgccgctgcatgtcgggctgagcacgctgtggctgctcagcagtgccctgctcctgctgcacatcctgcgcgaatggacccgcgtattacgtctgcgcatgcatcagcaccctcatgatgaaccactcactcacgcgctttggcctacgatcagcctgctgattccggcagatggctgcagtgccgaa…	MPWNITHLWRGVALLGLLLASMAHGAENARLQLQLDARLDSLIAEQSAPYELPSAASGIPLVHTPEQVVAAPLHVGLSTLWLLSSALLLLHILREWTRVLRLRMHQHPHDEPLTHALWPTISLLIPADGCSAEQTRRLDALANLGSDYPQERIHYVPMFDPADIQVALAVERLIQRTGDRVHPLPMMAGPNTTLASALHAAVNTSIGTALVILDRDIPLPTDWLRRSVTPLLDPGVGCVLTRAIARQPQGGLLERLSVMNDQADTLLATDVDALNLLMCGKARIRALRREAIKALEHPELQRAPDGAGLVLDITRLGWQSALLADIQHYRPLDTPDQIRSPRLNPALALKSMRMAALLLRPGLAPGARRQGGAAFFSSALPLIWLLCLASGIGLYFSGA…
NODE_10088_length_10141_cov_6.41682_ID_21063	fig|857335.5.peg.10	NODE_10088_length_10141_cov_6.41682_ID_21063_8349_7513	8349	7513	-	Pantoate--beta-alanine ligase (EC 6.3.2.1)	FIG00000440	atgcagatccatacccgcatcgcaagcctgcgcgccgcactggccagcgccggccgcatcggtttcgcacccaccatgggcaacctgcacgccggtcacgtcagtctgatgcgtacggcacgccagcatgcagacagcgtggtcagcagcatcttcgtcaaccgcctccaattcggaccgaacgaagatttcgaccgttacccccggaccttcaaggctgactgcgaaaaactcgaggccgctggcgtagaccacctcttcgccccggatgaagcaacgctttacccgcaaacgcagacctatctcgtcaccccggaccccatgcacgacggcctactcgaaggtgccatccgccccggtcacttcgcgggggtcaccacagtggtcagcaagctcttc…	MQIHTRIASLRAALASAGRIGFAPTMGNLHAGHVSLMRTARQHADSVVSSIFVNRLQFGPNEDFDRYPRTFKADCEKLEAAGVDHLFAPDEATLYPQTQTYLVTPDPMHDGLLEGAIRPGHFAGVTTVVSKLFNIVQPQVACFGKKDYQQLMVIRNMVAQLNLPIEVIGCEIVRADDGLALSSRNGYLSAEERTQAPQLQACLQQVVSAIVTGDRNRETLETQARDVLIRQGWAPDYITIRRQADLQAPEPGDAVVILAAARLGKTRLIDNLECPALW
NODE_10088_length_10141_cov_6.41682_ID_21063	fig|857335.5.peg.11	NODE_10088_length_10141_cov_6.41682_ID_21063_9085_8495	9085	8495	-	lipoprotein, putative		atgaacacccggaacattctcgcaagcctcggcatcgctgccgccagtctgatcctgagcccggtcagccaggccgaagtcaacatcagtgtcaatctgccagggatcaccatcggcatcaatgatgctcctccgccagtgcgtctggaaaagatcccggccaggcgttccggctatgtctgggcgcccggctactggcagtgggatggtcatgcgcacgtctggatcagtggtcactggctggccgaacgtccgggccacgtctggattcccgaacgctgggaacgcaatgacagaggctggactttcacccccggacgctgggatcagcggcgcaacgactggcgcgcagaacaacgccgcgaacaggccaagtgggaacaatggcgtacggatgac…	MNTRNILASLGIAAASLILSPVSQAEVNISVNLPGITIGINDAPPPVRLEKIPARRSGYVWAPGYWQWDGHAHVWISGHWLAERPGHVWIPERWERNDRGWTFTPGRWDQRRNDWRAEQRREQAKWEQWRTDDRRRNSEWQSQQKHQQVQPTAQRAPAQAAHDMRSPDKGERQHEAPRRQQHDDPHGPKDRDDRGR
NODE_10088_length_10141_cov_6.41682_ID_21063	fig|857335.5.peg.12	NODE_10088_length_10141_cov_6.41682_ID_21063_9947_9231	9947	9231	-	FIG00809194: hypothetical protein	FIG01570948	gtgcaaggcgtcgaccatcaacccttgctgcttctggagaatgcaatgctcaaccccggccgttcatacagatcccgcggtttcaccctggtcgaaatcgccatcgtcctggtcatcatcggtctgctgctgggcggagtactcaaggggcaggaactgatcaacagtgccaaggccaaggccgtggtgaatgacttccgcaacaccatgaccatgatcgctgcctaccaggatcgttttcgccagtggcccggggacgacagcgcggccgatacccgcttgcccaacaataccgcgcgcctcaagggcaatggcaacggccagatcgaaggcagctggcgcgacgctggcaatggcggctccagcagcgaggcccgcgccgtctggctgcatctgcgc…	MQGVDHQPLLLLENAMLNPGRSYRSRGFTLVEIAIVLVIIGLLLGGVLKGQELINSAKAKAVVNDFRNTMTMIAAYQDRFRQWPGDDSAADTRLPNNTARLKGNGNGQIEGSWRDAGNGGSSSEARAVWLHLRLANLATGSTDTSSTDYAPRNSEGGIIGVQSHSSAFANLNGRLVICQDGISGRIALQVDSSMDDGNPDAGSVQFGTWSDNGALVPATLGTNGTFSDSQAYVICTAT
NODE_10155_length_10063_cov_15.1436_ID_21193	fig|857335.5.peg.13	NODE_10155_length_10063_cov_15.1436_ID_21193_164_367	164	367	+	Transcriptional regulator, ArsR family		gtgtgcgcaggccagatccacgccaaggccggcctttcctgttccacggtttcagcccacctggcctgcctgcagcgggcgggcctggtgagtacgcgcaagctcgggcaatggattttctatacccgcgacgaagcggccatctcggcattcctgcaacacatgcagcacacgctgcaatctcccctggagcatcagacatga	MCAGQIHAKAGLSCSTVSAHLACLQRAGLVSTRKLGQWIFYTRDEAAISAFLQHMQHTLQSPLEHQT
NODE_10155_length_10063_cov_15.1436_ID_21193	fig|857335.5.peg.14	NODE_10155_length_10063_cov_15.1436_ID_21193_364_1422	364	1422	+	N-ethylmaleimide reductase (EC 1.-.-.-)	FIG00634574	atgagcaaactgttcgaacccctgaaggtgggcgacctggtctggcccaaccgcatcgtcatggcgccactgacgcgctgccgcgccgatgccggacgtgtccccaacgccctgatggccgagtactacgcacaacgcgccagcgccggtctgatcctttccgaggcgacctcggtcacgccgatgggggttggttatcccgacacccccggaatctggagcgaggcgcaggtcgaaggctggaagcaggtgacgcgcgccgtgcatgctgccggcgggcggatcttcatgcagttgtggcatgttggccgcgtctcccacccggatcatctcgcgggtgaattaccggtcgcgcccagtgccatcgcaccgcaaggccacgtcagcctgctgcgcccg…	MSKLFEPLKVGDLVWPNRIVMAPLTRCRADAGRVPNALMAEYYAQRASAGLILSEATSVTPMGVGYPDTPGIWSEAQVEGWKQVTRAVHAAGGRIFMQLWHVGRVSHPDHLAGELPVAPSAIAPQGHVSLLRPMRDYVVPRALETDEIPGIVEAYRQGAENAKRAGFDGVEIHGANGYLLDQFLQDSTNQRTDRYGGSLENRLRLPLEVADAVIGVWGANRVGYHIAPRCDSHTMGDSDPLATFTALARELGKRDVAFLFARESQDAPRLGPAIKQAFGGIYIANQGLTPDAAESLLARDEADAVSWGQAFIANADLPLRLASGKPLNKPQPETFYGYGLNDPRLGYVDYAA
NODE_10155_length_10063_cov_15.1436_ID_21193	fig|857335.5.peg.15	NODE_10155_length_10063_cov_15.1436_ID_21193_1580_2629	1580	2629	+	2-dehydro-3-deoxygluconate kinase (EC 2.7.1.45)	FIG00133209	atgaatcaacatcgcatcgtcagctttggcgaagtgctgcttcgcctgactccacccggctatctgaagctctcacagaccaacaccttcgcggcgaccttcggtggcagcgagaccaactgcgcggtctctctggcccgcttcggactgcagagcgacttcatcacccgcctgccgaagaacgacatcgccgaagcctgtctgggggagctgcgctcctatggtctgggaaccggacacatcgtgttcggtggcgaccgcctcggcctctactactacgagaatccggccgcgcaacgcgtctccaaggtcgtgtatgaccgcgccaactcctccttctctacgctcaaaccgggcatgatcgactgggagcaggccttcgagggcgcaagctggttt…	MNQHRIVSFGEVLLRLTPPGYLKLSQTNTFAATFGGSETNCAVSLARFGLQSDFITRLPKNDIAEACLGELRSYGLGTGHIVFGGDRLGLYYYENPAAQRVSKVVYDRANSSFSTLKPGMIDWEQAFEGASWFHWSGIGPGLNQDTADVTLEALRIAKRKGLTVSCDLNYRKNLWQYGKPAQEAMAPMLALTDVLFGTASEYKVAYGVSSAPGYKVRTAEEPIDLESYARFFAEVEKSSGPGKKFFIALRNTLDANHHILTGLFYAAGKLIPARTHAIDHVVDCVGVGDAFAAGMIYGLINYPDDDASALEFAVAAATLKNTIYGDFNLVTADEVKTLMKAEGSDGISR
NODE_10155_length_10063_cov_15.1436_ID_21193	fig|857335.5.peg.16	NODE_10155_length_10063_cov_15.1436_ID_21193_3649_2636	3649	2636	-	Transcriptional regulator, AraC family		atgcgccagctaacgatgtgcagcgacaccgcggatcacctgtcgctggggccgaagatccttcgccatgagctgttggcggcgggacgaacgacgggggattaccggttcctggatgtgcgtgagagcaccggggatgcggtcttgcagggcgctttcgtgatgagtgagctggctccgggcttggggatccacacggcggccgtgaccgacctgtgcagccagcgcagcgaatccgaagtggaagtcgggatgaagatcgtgatggtggtcgaaggcatgacggaggtcagctacggccataggcatctcacactggggccagcaggcgggcgctgcgcgggtgccatcctttcgatgcgggagcgtgctgccttctcgcgtcactggtgccgcggg…	MRQLTMCSDTADHLSLGPKILRHELLAAGRTTGDYRFLDVRESTGDAVLQGAFVMSELAPGLGIHTAAVTDLCSQRSESEVEVGMKIVMVVEGMTEVSYGHRHLTLGPAGGRCAGAILSMRERAAFSRHWCRGRRERKLVISLSPEWLASNFEGDASSYAERVREFTGQHLAMAEWQPSARAQWMAREVIAPPGLPAGLCRTYQMARSLDIVIEALGVIGSGEALVTAQAHRQMLGRRLCELLQTPAATSLSMGDIARQVGSNPVTLQQIAREALGMTVFEYLREQGLLRARAALAQGQAVAAAATLAGYASQSNFATAFKRRFGITPRGARPIVVG
NODE_10155_length_10063_cov_15.1436_ID_21193	fig|857335.5.peg.17	NODE_10155_length_10063_cov_15.1436_ID_21193_3763_5781	3763	5781	+	TonB-dependent receptor; Outer membrane receptor for ferrienterochelin and colicins	FIG00120101	atgaataccaagctccctttcccacagcgtcgcctccccgtcctgctcgccctgtgcaccatgccgctttccggtatcgccctggcccagagcagcaccggagaaaccgccactgaactcaagaccatcgtcgtcacagcctccaatcgcgaacaggaactacgcgacgcaccagccagcatcgccgtggtcacacgcgaggatctggagaagaaaccgctcaatgacgtggcaggcatcctcggcggcgtcgagggtgtcaccctgaaccgcaacggcaacggcgtgcccaccgtacaactgcgcggcctgggtgcggcctacacgctgatcctgatcgacggcaagcgcgtgaactccaccaacgcaatgttccgcggcaacgactacgatctcggc…	MNTKLPFPQRRLPVLLALCTMPLSGIALAQSSTGETATELKTIVVTASNREQELRDAPASIAVVTREDLEKKPLNDVAGILGGVEGVTLNRNGNGVPTVQLRGLGAAYTLILIDGKRVNSTNAMFRGNDYDLGWIPVADIERIEVVRGPMSSLYGSDAIGGVVNIITRKVGKTWAGSVKQELVHAEDGEAGGGMSTNFSLRGPLVADTLGLSLSGGYDKRDADKAVNTSGQSGIPRRENRYGSAKLNWTPAKDHEITTGYDYSLRDHDHFLLKREAVSLGHKGRYSFGSSEVNFYADETRNKSGTVTGETNPNKANSEALDGKLVLPVNFGFSQIVTLGGDVRRERLNDPKLLSGAPGSPGYGSDPEISVQQHAFFLEDELELNDQLRLTLGNRYDNHE…
NODE_10155_length_10063_cov_15.1436_ID_21193	fig|857335.5.peg.18	NODE_10155_length_10063_cov_15.1436_ID_21193_5862_6152	5862	6152	+	hypothetical protein		gtgtcccagtatcctcaacacagcagcgtcacgctgcccaacgccgacaaggtgctctacaagctcagcaagcatttcgcgctcaaggtcccggtcgaattcgacgactcgaattcccgcgtacagtttccggcgggcaattgcgaaatccagcgtgaaggcgatctcctgcgactgcagtgcagtgccgattcgaaggaaaaactggcccaggtgatccgcatcgtcgatcatcatctggcgctgatggcccgcaacccggaactccggatttcctggacagacgcctga	MSQYPQHSSVTLPNADKVLYKLSKHFALKVPVEFDDSNSRVQFPAGNCEIQREGDLLRLQCSADSKEKLAQVIRIVDHHLALMARNPELRISWTDA
NODE_10155_length_10063_cov_15.1436_ID_21193	fig|857335.5.peg.19	NODE_10155_length_10063_cov_15.1436_ID_21193_6166_7125	6166	7125	+	IroE protein		atgccttcgctacaaagaatcctgctgctgctttccctgttcctgctcatgcccatcgcccacgccgaaggtcccagcttcctgtcccggctgcctgccgaatggtccccggcccagctggcacgaagtgccagtttcgagatcgaatccaggcataccgggcaacgctatcgtgtattgctgggcatccccttctccgcggcgcccaaggcgggctatccggtcctgtgggcactcgacgggctggccagtttcccgacgatggaagctttccgcccgcgccagcctcgcgagcagacacgtgttgccgatgcctggcgtgaacgcgcggccggccaggtacgcgatggactgatcgttgctgtcggctacgccagcggcgaacccttcaacgtggat…	MPSLQRILLLLSLFLLMPIAHAEGPSFLSRLPAEWSPAQLARSASFEIESRHTGQRYRVLLGIPFSAAPKAGYPVLWALDGLASFPTMEAFRPRQPREQTRVADAWRERAAGQVRDGLIVAVGYASGEPFNVDARALDYTPEPQAPTGDLLSPRHGGAEAFLAFLTEELRPLLAEYFPMDPQRHTLFGFSYGALFTLHTLSTQPQYFQRYWAASPSLWFADHQTIKALPQRLKALDFAAAPVRVTITVGRDEQYPEQFASANIREQLQVRTMVDNVHRFAQLLQEKPGTQVTTFDLPGSDHYDMLQHGARHVLAFAFAP
NODE_10155_length_10063_cov_15.1436_ID_21193	fig|857335.5.peg.20	NODE_10155_length_10063_cov_15.1436_ID_21193_8009_7188	8009	7188	-	Methionine aminopeptidase (EC 3.4.11.18)	FIG00000036	atgctcaagcatagacaggtgccgatccgctcggcagaagaggtcgcgatggcccgccatgcgggggggctggctgcgcaggtgctgcgcatgattgcggagcatgtacgcccaggggtgaccacggatgaactggatcgcctgtgccacgaccatatcgtcaatgtgctgggtgcgattccggccaacatcggctatcacggctatgagaagatgatctgcgcttcggtgaatcacgtggtctgccacggcatcccgtccggcaagcgcttgcatcagggggacatcgtgaacatcgatgtggcgctgatcaaggatggctggttcggcgattgcagccgcatgtatttcgccggtgagcccagcgtgctggccaggcgcctggtccgcacgacctac…	MLKHRQVPIRSAEEVAMARHAGGLAAQVLRMIAEHVRPGVTTDELDRLCHDHIVNVLGAIPANIGYHGYEKMICASVNHVVCHGIPSGKRLHQGDIVNIDVALIKDGWFGDCSRMYFAGEPSVLARRLVRTTYEAMCAGIRTVKPGNTLGDVGHAIQTVAHRQGFSVVREYCGHGIGDVYHDEPQVLHYGRPGEGLRLVPGMVFTIEPMINAGKAATSTLPDGWTVVTRDRSLSAQWEHMVAVTETGFEVLTGWPDGYGDYPAIEQAEVLSDA
NODE_10155_length_10063_cov_15.1436_ID_21193	fig|857335.5.peg.21	NODE_10155_length_10063_cov_15.1436_ID_21193_8233_8009	8233	8009	-	hypothetical protein		atgggtatcgtcaagatttccgagcagatgcatgaggctttgcgccatgccagcggggcgttgagccgttcgatcaatgcacaggcagagcactggttgcgtgtcggcatgctggccgagctgaatcccacgctgaactacagcgagatctgccgtctgctgctcgagcaggagagtgcgcctaccgcggatgtgggccgggatgaattcgggaaggtggcgtga	MGIVKISEQMHEALRHASGALSRSINAQAEHWLRVGMLAELNPTLNYSEICRLLLEQESAPTADVGRDEFGKVA
NODE_10155_length_10063_cov_15.1436_ID_21193	fig|857335.5.peg.22	NODE_10155_length_10063_cov_15.1436_ID_21193_8431_8721	8431	8721	+	hypothetical protein		atgagttcccccgttgccgtaatcgccacgatcaccgcagccccgcaacacagggaagccgttgaagccgcgctgcgcattgccgtgccgctggtccgcaaggaagcgggctgcgagcaatacaccctgcatcgcgacctggcacaaccagacaacttcgtgatggtggaacgctggagcgacgaagccgcattgacacagcacgtccaggcgccggcattcctggcgctggcgaaagcactcgaaggtcgtgcggcactgagcgtgaccaagcttgaaccgctggtctga	MSSPVAVIATITAAPQHREAVEAALRIAVPLVRKEAGCEQYTLHRDLAQPDNFVMVERWSDEAALTQHVQAPAFLALAKALEGRAALSVTKLEPLV
NODE_10155_length_10063_cov_15.1436_ID_21193	fig|857335.5.peg.23	NODE_10155_length_10063_cov_15.1436_ID_21193_8814_9440	8814	9440	+	2-dehydropantoate 2-reductase (EC 1.1.1.169)	FIG00034973	atgagcaccgatctgcaacgcatccatttcatcggccttggcgccatcgggctgaaatacgccgcccgcctgcaagacctcgatcctgctctggtgaggatcatcgccgacaagcgtcgcatcgccgcgttccaggccaatccgcccgtggtcaatggcagaccgtatgacttcaggtttgtgagcccgggcaacgcggacatgccggcagatctgcttttcgttgcggtcaaggcacgtcagctgccacaggcgctggaagatctgcgcggcttcatcggcccgcacaccagcgtgatttccttgatgaacggcatcaccagcgaagaaatcatcggtaaagccatcggccacgagcatgtgctctacccacgtgtacatggatgccgtccgcgaggg…	MSTDLQRIHFIGLGAIGLKYAARLQDLDPALVRIIADKRRIAAFQANPPVVNGRPYDFRFVSPGNADMPADLLFVAVKARQLPQALEDLRGFIGPHTSVISLMNGITSEEIIGKAIGHEHVLYPRVHGCRPRGARGDVSRHRQGGIRRAGQHPALRTRAGDFRTLPPGGHSARDSRRHAARTLGQVHAERRRQPDLRCTARAFFHLPS
NODE_10155_length_10063_cov_15.1436_ID_21193	fig|857335.5.peg.24	NODE_10155_length_10063_cov_15.1436_ID_21193_9472_9744	9472	9744	+	2-dehydropantoate 2-reductase (EC 1.1.1.169)	FIG00034973	atgcgggaagtcgtcgccctatcgcaaacggcaggcattggcctgacacaggaagacctggatcgcgccatgcgcatcatcgacgccctcgccccaggcgccaagacttcgatgctgcaggatatcgaggccgggcgcgaaaccgaggtggacatcttcggcggcgcagtgattgcgcttggacagcgctatggcgtacccacgcctgtgaaccagacgcttttcgacctcatcaaggtaatggaggcgagcaatcgcacatctacggcctga	MREVVALSQTAGIGLTQEDLDRAMRIIDALAPGAKTSMLQDIEAGRETEVDIFGGAVIALGQRYGVPTPVNQTLFDLIKVMEASNRTSTA
NODE_10657_length_9405_cov_6.94043_ID_22175	fig|857335.5.peg.25	NODE_10657_length_9405_cov_6.94043_ID_22175_718_53	718	53	-	Probable glycosyltransferase	FIG00687685	gtgagcctcatcctcaaggccggcgaccccatcatcacctacgtcgcccgcaatctcgaaccctaccgcggcttccaccagttcatgcgcgccctgccagccgtactcaaggcacacccggcagcgcaggtgctcatcgtcggcggcgacgagcgcagctacggcagcctgcccacggatgcccccaactggcgtgaaagcatgctgcgcgaactgaccttcccttctcccttggagagagaggggccaggggagagggggcggcttcctgccgactggccaacccgcatccacttcctcggcaagctcccctacgaaacctacaagaaagtcctacaggtctcggcgctgcacgtctatctcacctatcccttcgtcctctcctggtcgctgctcgaa…	MSLILKAGDPIITYVARNLEPYRGFHQFMRALPAVLKAHPAAQVLIVGGDERSYGSLPTDAPNWRESMLRELTFPSPLEREGPGERGRLPADWPTRIHFLGKLPYETYKKVLQVSALHVYLTYPFVLSWSLLEAMVTGCRILASDTAPVREVIRDGENGELVAFFDVPGISRGILDALNDTERGGKLRRRAQETAQAYGLAAGLQAYAQLLGLNNESINKS
NODE_10657_length_9405_cov_6.94043_ID_22175	fig|857335.5.peg.26	NODE_10657_length_9405_cov_6.94043_ID_22175_1260_715	1260	715	-	Probable glycosyltransferase	FIG00687685	atggaggccgccgtgctccacggccaggcggttgcccgcgccatggccgctctcaagcgcaagggcttcgtgcccgatgtcatcctcgcgcacccgggctggggcgaaacgctctatgcaaaagagatcttcccggcggcacggttgatccatttctgtgagtggtactacagcacaaccggcgccgacttcggctttgaccccgaattcccgcctgacctcgacgatcgtctgcgcatcactacctggaacgcgctgcatctgctgaacctgcagcactgcgacgcggccatcgcccccacccgctggcagaagagccgcttccccgccgagtaccagcccaggatccaggtcatccatgaaggcatcgacaccgaaaacctcggccccgatcctgac…	MEAAVLHGQAVARAMAALKRKGFVPDVILAHPGWGETLYAKEIFPAARLIHFCEWYYSTTGADFGFDPEFPPDLDDRLRITTWNALHLLNLQHCDAAIAPTRWQKSRFPAEYQPRIQVIHEGIDTENLGPDPDATLVLSRRHSDLRQAQSLPRARSGDRPGSAQAGIQRLLSLKETKAERT
NODE_10657_length_9405_cov_6.94043_ID_22175	fig|857335.5.peg.27	NODE_10657_length_9405_cov_6.94043_ID_22175_2203_1808	2203	1808	-	hypothetical protein		gtgctcgtcctcgatgtggatcatttcaaacgcgtcaacgatacccacgggcatgccgtgggcgacgaagtcttgcggcagctggcccgtaccgtcagcggggagctgcgcgatacggacctgctggcacgcctgggcggggaagagttctgcgtgctgatgccggaaacgggtagcgatggcctgaagcggctggcgaaccgcctgctggaggctgtgcgtgccatggtggtcagattgcctgacgtttccctgcagatcaccgtgagcatcggtggcgccaatctgcgcgacccgcccgacaccttcaagcaggctttgctgcgcgcggacgaagcgctgtacacagccaagggcgaaggacggaaccgggtattgatccacggcgaggcttga	MLVLDVDHFKRVNDTHGHAVGDEVLRQLARTVSGELRDTDLLARLGGEEFCVLMPETGSDGLKRLANRLLEAVRAMVVRLPDVSLQITVSIGGANLRDPPDTFKQALLRADEALYTAKGEGRNRVLIHGEA
NODE_10657_length_9405_cov_6.94043_ID_22175	fig|857335.5.peg.28	NODE_10657_length_9405_cov_6.94043_ID_22175_3669_2275	3669	2275	-	FOG: GGDEF domain		atgaagtggatgttgcgtcatcgactgactgtggcagtggtgctcgtcatcctggtcattgatgcggggctgatggccctgcgcgagcagcggcgcgaggaattgctgaatcagggcgtgctgcgcatgcaactggcttcaggcgtgaccgtcgagcggctggactggttgatcgaagcgcagaagaacgtgcttttcgggctggccgacaccctgcgggccagcgggctgcccaaggcgccgaatgtttccatctaccacttgctgcaacgccgtcaggccgcctccaagggcgttgcctggctggccctgcacggccctgacggacgcctgctcgggcgctccgggtcatggccggtcccgacgcagtgcagcgagccgccggattacttcaaggac…	MKWMLRHRLTVAVVLVILVIDAGLMALREQRREELLNQGVLRMQLASGVTVERLDWLIEAQKNVLFGLADTLRASGLPKAPNVSIYHLLQRRQAASKGVAWLALHGPDGRLLGRSGSWPVPTQCSEPPDYFKDQLSLKSQGLIFGEPERDCLTGVEFVSITLAVRSELNEFLGVLVAAIRPAEIATLIAETALPDGFDLHLLNGQGQEILCYNSDGPCSVPKSVAMGSAHALPQGGRFGDPRLDARVGFVLASPHHPYRVVVCAANERLLTAWRAEHHLYLLIGGASNIALVLLVVITLRHVRRRREALTALAEANYHLKARVALRTGALERSKAQARIFMNAARDAILVADADERILEYNHAAERLYGYSRAEVLGRKLGMLVADGDSRQDIARIHAS…
NODE_10657_length_9405_cov_6.94043_ID_22175	fig|857335.5.peg.29	NODE_10657_length_9405_cov_6.94043_ID_22175_5420_3822	5420	3822	-	NAD synthetase (EC 6.3.1.5) / Glutamine amidotransferase chain of NAD synthetase	FIG00000914	atgacgctccgtatcgctgtcgcgcagctcaattgcaccgtgggtgatttgccgggcaacgttgccttgattctcggtgccgtccgtgaggcgagggccagaggcgcgcatctgctgctcacccccgaactctcgttgtgcggctatccaccggaggatctgctgctgcgcgaggatttctaccttgcctgcgagtgtgagctgctggcactggcggaggccgcgcacggcatcgacctgatcgtggggcatccgctgcatgccgacggcgaagcctggaatgccgcctcgctattgcgtgacggccgggtggtggcgagctaccgcaagaaccgtctgcccaattacgaagtcttcgacgagcgccgttatttcgccgccggcagcgccccttgcgtg…	MTLRIAVAQLNCTVGDLPGNVALILGAVREARARGAHLLLTPELSLCGYPPEDLLLREDFYLACECELLALAEAAHGIDLIVGHPLHADGEAWNAASLLRDGRVVASYRKNRLPNYEVFDERRYFAAGSAPCVIKVQGVRVGINICADVWGPDSVLAAADAGAELLLVLNASPFHMGKHQQRREVIGERVRESGLPVLYCNLVGGQDELVFDGGSFALDDEGSLSFQAPAFEARVDVLDFADGRFSSEVCVPRGSVEAEVYEALKLGVRDYLDKNRFPGAIIGLSGGVDSALTLAIAVDALGADRVRAVMMPSPYTAQMSLDDSREMVRLLGVRYDELVIEPAMHTFARMLTPLFEGRPEDTTEENLQARIRGMSLMALSNKFGSIVLTTGNKSEMAVG…
NODE_10657_length_9405_cov_6.94043_ID_22175	fig|857335.5.peg.30	NODE_10657_length_9405_cov_6.94043_ID_22175_6959_5544	6959	5544	-	NAD(P) transhydrogenase subunit beta (EC 1.6.1.2)	FIG00000629	atgtctgcaagtctggcttcggtctcctacctcggggcagccatcctgttcatcctctgtctgggcggactttccaaccaggaaaccgcgcgtcgcggcaacttctacggcgtgctcggcatgaccatcgcggtgctcgccacggtgttcggcccgcgtgtggctgcggcaggcctgccgtggatcatcggcgcgatggtcgtcggtggtgccgtggggctctatctggcccgcgtcgtcaagatgacgcagatgcccgaactggtcgccttcatgcatagccttgtcggcctggccgcgtgcctggtcggttttgcgagctatatcgacacttccatcgcctataccggtgctgaaaaggctatccacgagatcgagatctatgtcggcatcctgatc…	MSASLASVSYLGAAILFILCLGGLSNQETARRGNFYGVLGMTIAVLATVFGPRVAAAGLPWIIGAMVVGGAVGLYLARVVKMTQMPELVAFMHSLVGLAACLVGFASYIDTSIAYTGAEKAIHEIEIYVGILIGAVTFSGSVVAFGKLSGKIGGKPLLLPGRHLINLFGLLVVLYYGYAFLQVDSISAGMVPLMVMTVISLFFGVHMVMAIGGADMPVVVSMLNSYSGWAAAATGFMLSNDLLIVTGALVGSSGAILSYIMCNAMNRNFISVIAGGFGSDGGAPKAAASGAVQPAGEVTPVSSVETAELLREAKSVIIVPGYGMAVAQAQHTVFEITSHLRAKGVNVRFAIHPVAGRMPGHMNVLLAEAKVPYDIVMEMDEINDDFPDTDVVMVIGAND…
NODE_10657_length_9405_cov_6.94043_ID_22175	fig|857335.5.peg.31	NODE_10657_length_9405_cov_6.94043_ID_22175_8560_6974	8560	6974	-	NAD(P) transhydrogenase alpha subunit (EC 1.6.1.2)	FIG00001143	atgtcactgctcataggggtgcctcgggaggtctttgcaggggagaagcgtgtcgcgaccgtgccggaggtcgtggaaaagctgatcaaactggggttcagggttgtcgtcgagaccggcgcgggtgccgctgccaactgtgatgacgatacctaccgtgccgtcggcgccgagatcgccgagcgcgcggcgaagctgtgggcgagtgctgatatcgtcttcaaggtccgtgccccgagcgacgaggaagtcgcctcgatgcgcgagggctgcacgctcatttccttcatctggcccgcccagaatcccgagctgatgcagaagcttgcggcccgcaaggtgaccgtgctggccatggatgcgctgcctcgtcagctctcccgggcgcagaagatggat…	MSLLIGVPREVFAGEKRVATVPEVVEKLIKLGFRVVVETGAGAAANCDDDTYRAVGAEIAERAAKLWASADIVFKVRAPSDEEVASMREGCTLISFIWPAQNPELMQKLAARKVTVLAMDALPRQLSRAQKMDALTSQAGVAGYRAVIEAANAFGRFFNGQITAAGKVPPAKVFIAGAGVAGLAAIGAAAGLGAVVRANDTRAEVADQVKSLGGEFVKVDYEEEGSGGGGYAKVMSEGFQQAQREMYAREAKQADIIITTALIPGKPAPKLITAEMVQSMKPGSVIVDMAAEQGGNCELTVPGEAVVRHGVTIVGYTDLVSRLAKQSSTLYATNLFRLTEELCKTKDGKIDVNFEDDAIRGLTVIKDGEITWPAPAPKLPAVAAKPAAAPVPVAKKAHG…
NODE_10657_length_9405_cov_6.94043_ID_22175	fig|857335.5.peg.32	NODE_10657_length_9405_cov_6.94043_ID_22175_9093_9353	9093	9353	+	hypothetical protein		atgcgcaaacgcccttctcgcagcagcgcgaaaacccgtaattcctatgcccgcaaggcgggcctgccgccgggcagcatcgtgcacatcggcgacaaaccgctggatcaggccagtttctcgttgttcgattacgacggcgatggtcagcgcgaggtccacttttccacactcgccgcctcgcgccagtattcccggcagcaccgctggatctggctgcatgtgcagggcgtgcatgaaacggcagtcatggaagagtga	MRKRPSRSSAKTRNSYARKAGLPPGSIVHIGDKPLDQASFSLFDYDGDGQREVHFSTLAASRQYSRQHRWIWLHVQGVHETAVMEE
NODE_106_length_90329_cov_7.03585_ID_305	fig|857335.5.peg.33	NODE_106_length_90329_cov_7.03585_ID_305_363_79	363	79	-	hypothetical protein		atgggtaagatctgcgacgaaacctattccgagttcctggaatcgatcaaggccgccggcatcgaaatcaccaacgaacttgcattgcgtgagcggctggctgaaacacagcgctggcgctttgccttcatgaccctggccctgcatggcaggccactcgggatcagcttccaggagcgtactggcgagcgcgatctggatcagatcaatggcgcatttgcccgctatcagttccctgcggactctgggtccctgtttgccgcgcgcctcggcgccgttcagtaa	MGKICDETYSEFLESIKAAGIEITNELALRERLAETQRWRFAFMTLALHGRPLGISFQERTGERDLDQINGAFARYQFPADSGSLFAARLGAVQ
NODE_106_length_90329_cov_7.03585_ID_305	fig|857335.5.peg.34	NODE_106_length_90329_cov_7.03585_ID_305_1131_457	1131	457	-	phosphoesterase, PA-phosphatase related	FIG01257096	ttgcgcaacgaaccccgctctggcgaccagtggtggtcgcgtttcatgtccgtgctctgcaagcagttctggctcaagagtctgggaaccatggggttcaccgctgcgttcttcgtggcctacatctacctgctgaagaatcctgcctatcccgtgaccgaggtgccgctgacctggctggacagggtcgtgccgttcagccccctggcgctggtgccctacttgtcgttatgggcctatgtttccctaccgccgctcttcttggtcaacgcaagcgaactgatcagctatggtttgagaattggggcggtttgcctgcttgggctgttgatcttccatttctggccgactgcggtgccgcctgccgacattgactgggcgcgctatcccggcgtggcg…	MRNEPRSGDQWWSRFMSVLCKQFWLKSLGTMGFTAAFFVAYIYLLKNPAYPVTEVPLTWLDRVVPFSPLALVPYLSLWAYVSLPPLFLVNASELISYGLRIGAVCLLGLLIFHFWPTAVPPADIDWARYPGVAFLKGVDAAGNACPSLHVATAVFSAVWLQRLLCESGAPRYLVWVNLLWCGLIVWSTLATRQHVALDAYGGALLGGAGAWLSLLRRRLAPSAV
NODE_106_length_90329_cov_7.03585_ID_305	fig|857335.5.peg.35	NODE_106_length_90329_cov_7.03585_ID_305_1381_1256	1381	1256	-	hypothetical protein		gtgtgccaaacctgggtctccttccagagtggcgttttttgcggcagcatccagcggtcacccgcgcatgctgctcgcttgtgcgcgtctcgtgactatcaccgtctacggctgcggcagcaatag	MCQTWVSFQSGVFCGSIQRSPAHAARLCASRDYHRLRLRQQ
NODE_106_length_90329_cov_7.03585_ID_305	fig|857335.5.peg.36	NODE_106_length_90329_cov_7.03585_ID_305_1394_2368	1394	2368	+	hypothetical protein		atggtcggcagcattgtgatcgccatcggcgccgcggcactgggcagctggtttgcggacgcaggcctgttgatcccgctggcagtcgccggtgcggccttgccactgccactccatgcctggtggcgagcctaccatcacggcaggaatcagcgggctaccagtgaagccctgatacaaaccttgcttgaggtcattccggaaccggcctatctgaaggacgcgcaaggccgctatctcatggtaaacacggcctttacgcgacaacgccagcaatcgcccgagcagatcctgggacgcacggcgttcgaactggcgcctgacgaagacaccgcacgcttcgtgcaggcagaggacgaagccgtgctggccggccagatcgtctacaacgaggatctc…	MVGSIVIAIGAAALGSWFADAGLLIPLAVAGAALPLPLHAWWRAYHHGRNQRATSEALIQTLLEVIPEPAYLKDAQGRYLMVNTAFTRQRQQSPEQILGRTAFELAPDEDTARFVQAEDEAVLAGQIVYNEDLTRNAYSGDECLRLISKRSSLWLDGQRVIVGASFDISQVRHTETRLQQALDRQTEIAINTVNFVQRLLNVIPEPVYIKDAQGHYVFINEAFARQRNQTASEILGRTATELAPDGATAALVAHEDAEVLSGHSIHKEDQKPHPVTDDIIHRIVTKGACLDAEGRPVIIGANFDITDLRRAQADLQEALARERE
NODE_106_length_90329_cov_7.03585_ID_305	fig|857335.5.peg.37	NODE_106_length_90329_cov_7.03585_ID_305_2399_4072	2399	4072	+	diguanylate cyclase/phosphodiesterase (GGDEF & EAL domains) with PAS/PAC sensor(s)	FIG00561534	gtgctcgaccagctcccctaccccgtctacgtcaaggatgcccatagccgctatctaacggtcaatcaggccatggccgacgagcacggcgcgagtcgcgaaaccttgctgcaacagacagggatcagctcccaggaaggctctgccggtctgcgcgtcatgctcgacgaggacgcccgggtcatcgatggcgaacgcatccggcgcgaggaacatggcccgcatcctctcaccggccaggaacgcttccgtatcgcgaccaagagcacttgcctgaacgcactcggcgagccggtcatcgtaggtacgatggttgatctgaccgaactgcgccaggccgagcgcgagatccgcgaggcgctggcgcgcgaagtgaagctgcgggagcgtacggaagaa…	MLDQLPYPVYVKDAHSRYLTVNQAMADEHGASRETLLQQTGISSQEGSAGLRVMLDEDARVIDGERIRREEHGPHPLTGQERFRIATKSTCLNALGEPVIVGTMVDLTELRQAEREIREALAREVKLRERTEEFIQRLIDVIPDPVYVKRADGRYLIINDAFAEYQARSRQALLDDPAYFPHLSEESQQLSNAEDQAVLGGSEVFKEEHTIRRATGEEIFRIVTKRRSAYVDGEPVVIGVDRHTTKWRLAERELKAALDREVNLRERTQAFVQRLIDVIPDPVYVKKADNHYVMVNEAFLQFHRRARGEVLNNPRIMLWGREEDRLNALSEDRTVLDGGEVIKEEHTVRVGTDEEVFRIVTKRLSSYFDGVPVIIGIDHHITRWRVAERELLRLAQQDT…
NODE_106_length_90329_cov_7.03585_ID_305	fig|857335.5.peg.38	NODE_106_length_90329_cov_7.03585_ID_305_4629_4078	4629	4078	-	DJ-1/YajL/PfpI superfamily, includes chaperone protein YajL (former ThiJ), parkinsonism-associated protein DJ-1, peptidases PfpI, Hsp31	FIG00002967	atgccgagcgttgatatctacatggccgaaggcttcgaggaaaccgaactggtgacggtggcagacgtcttgcgtcgcgccggagtggaaacccggctggtctcgctggacgggcagaagagcgtgcgcggtgcgcatgacatcgtgcttgaggccgatcttggtttcgcggatattggcgcccagccggacatgatcgtgctgccggggggcggtcccggtactcgccgtttgcgtgagagcgagccattgtctcagcgtttgcgcgcgcaaatcgatgctggcgggcgtgtggctgcaatctgtgcggcgcctactgcattggctgcggcgggggttctgcaggggcgccgggcctgctgttttccagggtgcgaagatgcgctgcgcgagggcggc…	MPSVDIYMAEGFEETELVTVADVLRRAGVETRLVSLDGQKSVRGAHDIVLEADLGFADIGAQPDMIVLPGGGPGTRRLRESEPLSQRLRAQIDAGGRVAAICAAPTALAAAGVLQGRRACCFPGCEDALREGGAEIAAYNVVTDGLVTTSRGPGTSAVFALELVTLLVGAPKARELSQAMLLS
NODE_106_length_90329_cov_7.03585_ID_305	fig|857335.5.peg.39	NODE_106_length_90329_cov_7.03585_ID_305_8831_4668	8831	4668	-	ATP-dependent helicase HrpA		atgcctgaaccggatctgctcgacctcgtactgacccgtgaccgcccggccttgcgccgtcagttgttccagcttaaaccacgtccgcgccagctttccgcattgccagaggcattgcaaaagcgtttcgagcaatccattgccacgcgtgctcagcgccgcgaaaggcgtccccggccgacttttccgggtgaattgccggtcaatcagcgccgtgaggagattgccgagacgatccgtacgcatcaggtcgtgatcgtctgtggcgagacaggctccggcaagaccacacagcttcccaagatttgtctcgaactcggccgtggcgaggcaggtctgattggtcatacccagcctcgccggctggccgcgcgcgccaccgcagcccggattgccgag…	MPEPDLLDLVLTRDRPALRRQLFQLKPRPRQLSALPEALQKRFEQSIATRAQRRERRPRPTFPGELPVNQRREEIAETIRTHQVVIVCGETGSGKTTQLPKICLELGRGEAGLIGHTQPRRLAARATAARIAEELGSELGTAVGFKVRFTDHTKPESYIKLMTDGILLAETQGDPALSAYDTLIIDEAHERSVNIDFLLGYLRQLLSRRPDLKLIVTSATLDAERFAKHFALDGKPAPVIEVSGRLYPIEIRYRPIEEDEPVQQRSATDRRLQRRDDRRSHEPKKDLYEAIVDAVGELQREDPGDVLVFLPGEREIREAADALRHDHLPGTEILPLYARQSAQEQARVFSRSNGRRVVLSTNVAETSLTVPGIRYVVDAGLARINRYSHRNKVELLQIE…
NODE_106_length_90329_cov_7.03585_ID_305	fig|857335.5.peg.40	NODE_106_length_90329_cov_7.03585_ID_305_9151_8891	9151	8891	-	Translation initiation factor 1	FIG00000143	atggctaaagaagaactgatcgagatgaatggtgcggttgatgaagtgttgcctgattcccgttatcgcgtgaccctggaaaatggtcaccagctgattgcctatacctccggcaagatgcgcaagcatcacatccgtattctggcgggcgacaaagtgtcgctggagctgtcgccctatgatctgaccaagggccgtatcacgttccgccatatcgaagggcgcggccctggccctgcctcgacccagcgtcgacgctga	MAKEELIEMNGAVDEVLPDSRYRVTLENGHQLIAYTSGKMRKHHIRILAGDKVSLELSPYDLTKGRITFRHIEGRGPGPASTQRRR
NODE_106_length_90329_cov_7.03585_ID_305	fig|857335.5.peg.41	NODE_106_length_90329_cov_7.03585_ID_305_9455_9252	9455	9252	-	Cold shock protein CspD		atggcaactggtatcgtgaagtggttcaatgattccaagggtttcggtttcatcacccctgacggtggcggcaaggatctgttcgctcacttctccgcaatccaaggcggtggtttcaagaccctgcaggaaaaccagcgcgtgagcttcgatgtggtgactggcccgaagggtgagcaagcttcgaacatccgtcccgagtga	MATGIVKWFNDSKGFGFITPDGGGKDLFAHFSAIQGGGFKTLQENQRVSFDVVTGPKGEQASNIRPE
NODE_106_length_90329_cov_7.03585_ID_305	fig|857335.5.peg.42	NODE_106_length_90329_cov_7.03585_ID_305_10373_9690	10373	9690	-	CidA-associated membrane protein CidB	FIG00001473	atgctgagcctttctgcccttgtctggctgttgctcacagtgatcctgtatgccggggcacgcatgctgtatcgccgctacccgcgtacctggttgtcgcccctgatcgtggcgccattgctgctgatcgtgttgttgctggtcacggggagttcatacaaggagtacaactcgctgagccactggctcagtgccatgctgggcccggccaccatcgcttttgcattgccgatctatgaatatcgtggcgtgatccggcggcactggctgagcctgagcgctggcgtgctggctggcatgatcaccgcggtgctgagcacggtgatcctgagccggcttttcgggctgccggtactgatcgagcgcagtctggcggtgcgctcgatcagtacgcctttc…	MLSLSALVWLLLTVILYAGARMLYRRYPRTWLSPLIVAPLLLIVLLLVTGSSYKEYNSLSHWLSAMLGPATIAFALPIYEYRGVIRRHWLSLSAGVLAGMITAVLSTVILSRLFGLPVLIERSLAVRSISTPFALAAAPELGGQADLAAIFVVITGLGGMIIGELLLLRFNVRSALARGAMFGAGAHAVGTVTAHRRDPEEGVISSLTMIIAGILMLLTSPWLAGFF
NODE_106_length_90329_cov_7.03585_ID_305	fig|857335.5.peg.43	NODE_106_length_90329_cov_7.03585_ID_305_10774_10367	10774	10367	-	Holin-like protein CidA	FIG00001480	gtgtcacacggttttcgttctgcgggttttcgctctgcgctgaaagtcctggcgcagattctgctgctggtcctggtctggtggctggtttccagcctttccagcatcctgcctcaattgccccccacggtgcttggcattgccttgctgttggcactattggggctgcgcgttctccctactgactggcttgccgctggcgccggcttcctgctgcgcgaaatgctgcttttcttcatccccgtcgtggtggccgtggtgcagtacctcgatctgctgcgcagcaatctgccagctgtcctgacggtgatcctgttgagcactctctgcgtgatgctggtgacagcctgggtagtcgatttcacctggaaactcgaggctcgctggcggagggacgaa…	MSHGFRSAGFRSALKVLAQILLLVLVWWLVSSLSSILPQLPPTVLGIALLLALLGLRVLPTDWLAAGAGFLLREMLLFFIPVVVAVVQYLDLLRSNLPAVLTVILLSTLCVMLVTAWVVDFTWKLEARWRRDEEC
NODE_106_length_90329_cov_7.03585_ID_305	fig|857335.5.peg.44	NODE_106_length_90329_cov_7.03585_ID_305_12078_10798	12078	10798	-	Potassium efflux system KefA protein / Small-conductance mechanosensitive channel		atgcgtgacaacttctccagcctgatcgcccagttgacccatggtacggcgtggctggaattgtcggtcatcgccctgctgctgctggtggcgtggcggctcgcacgaagcgtgcagcagcggatggtcgcgcctcgtctggctgggcggctgccggtcaagggaacgccatcgctgttgtttcctttgctgggcgtcctgttgctcagcgcgctgattttcctggcgcagcatttcgactggaccttgcatttcgccgtcattgccacgcgcctgctgtgggcgatggtgatcattcgcatggtggtggtcgcggcgagtcaggcctttccgcgcgcgctttggttggcgggtttctcgcgcagcatcgcggccatcgtctggtgcgtcgttgcattg…	MRDNFSSLIAQLTHGTAWLELSVIALLLLVAWRLARSVQQRMVAPRLAGRLPVKGTPSLLFPLLGVLLLSALIFLAQHFDWTLHFAVIATRLLWAMVIIRMVVVAASQAFPRALWLAGFSRSIAAIVWCVVALDLLGLLPDLITWLDSQKLPLGKSQVSLWDLLQGVVSVFAAVVVALWLGGVIESRLARASGLDSSVQVVISRVANAVLTLIAILVGVEMVGLDITTLSVFGGALGVGLGFGMQKIASNYVSGFIILLDRSIRIGNLIQVGDQRGEVMRITTRYTVLKASGGAHCLVPNETLIGSTVVNESFTDPNIRIGLRVQVSYDSDVEHALKLLEGLALQEARVLRDPAPAAYLVSFDDNGITLELGMWIRDPLNGSLGLRSNLNRAILAAFRA…
NODE_106_length_90329_cov_7.03585_ID_305	fig|857335.5.peg.45	NODE_106_length_90329_cov_7.03585_ID_305_13370_12105	13370	12105	-	Fmu (Sun) /eukaryotic nucleolar NOL1/Nop2p; tRNA and rRNA cytosine-C5-methylases		atgacgaccaatatcacttccgctcagctcgacgccgccgccgaccttctcgacgaggtgctgcgtttccagttcccggccgacagcgtcgtgtccggtttcttccgcaagaaccgcaatgctggcgcacgcgatcgcgccttcatcgccgaagccgtgtatggcgtgttgcgcaatctgcgccaactgcgtgccgtggtgggggagtccacgcgtgcgcgcaagctcgtgctggcctggttgctgcgtgtcgagggcctgtcgcagcgccagttggcccccttgttgtcgcgcggcgaagccgagtgggtgggggaactcaaggcttccagctatcagcccgtcagcctgggcgagcgcaccaacctgccggattggctggccgagcgtctgctggcc…	MTTNITSAQLDAAADLLDEVLRFQFPADSVVSGFFRKNRNAGARDRAFIAEAVYGVLRNLRQLRAVVGESTRARKLVLAWLLRVEGLSQRQLAPLLSRGEAEWVGELKASSYQPVSLGERTNLPDWLAERLLAQSDETRVMALASALNRPALLDLRVNPLKIERDAALERLLANGITAQPTPYSPLGIRVDARTALQRHPLFTDGSIEVQDEGSQLLGLLLAPRRSEMVADFCAGAGGKTLLLGALMRSTGRLYAFDVSEKRLQKAKPRLARAGLSNVHPVTIDHENDARIKRLAGKMDRVLVDAPCSGFGTLRRNPDLKWRQTEAALAALTQKQASILAAAARLVKPGGRLVYATCSLLREENDGIVDAFLAAQPQFRPVAAEEILKQAGVALETGER…
NODE_106_length_90329_cov_7.03585_ID_305	fig|857335.5.peg.46	NODE_106_length_90329_cov_7.03585_ID_305_14258_13443	14258	13443	-	Uracil-DNA glycosylase, family 4	FIG00006165	atgacatctcaaaccctctccgttctggccgaattgggtgtcaagcctttgtggcgcttgcgtgctcatgaggaagcggctgcgccggaggcgccagcgatggccgaggccgctgttcagccggagcctcctggccaccgtatcgccgagcctgagcgtccgccacgtcctgccatggtgatgccggaacggcagcccgccagtacgccgaccgtggcggatgccggtttgccgctggtgcccgggctggcggacatgggttgggacgatctggcggctaccgtggcggcatgccagcgctgtggcctgtgtcagcgtcgcaagcagacggtgctgggggtgggcgatcatcaggccgactggatgctggtgggggaagggcctggcgcggaggaggat…	MTSQTLSVLAELGVKPLWRLRAHEEAAAPEAPAMAEAAVQPEPPGHRIAEPERPPRPAMVMPERQPASTPTVADAGLPLVPGLADMGWDDLAATVAACQRCGLCQRRKQTVLGVGDHQADWMLVGEGPGAEEDARGEPFVGAAGKLLDAMLAALGMQRGENVYIANAVKCRPPGNRTPEAAEIDACKPYLLRQIELVRPRLIVAMGRPAAQALLARELKIGAARGKVFHFGETPLVVTYHPAYLLRNPLDKARAWEDLCFAQAQLEALGPR
NODE_106_length_90329_cov_7.03585_ID_305	fig|857335.5.peg.47	NODE_106_length_90329_cov_7.03585_ID_305_14713_14255	14713	14255	-	Ribosomal-protein-S18p-alanine acetyltransferase (EC 2.3.1.-)	FIG00122145	atgatcgcgttgccgatgtcggtggtgctgccgatgcaagaagaagatctggacgaagtggcggcctgcgaagcgcgggccacggctttcgcatggtcacggcagcattttgcagattcccttgctgccggctacgcttgctggctcatgcgccgggatggtgaactggtggggcaggctgtcgtgatgaatgtgctggatgaagcgcatcttctgatcatcagcgtggcgctggaatggcgcaggcgtggcttcgcccgtcagttgctggcgcatctgcgttcgcatgcacgcgaagtcggcgtggcccagcttttcctggaggtccgcgcctccaatgaagccgccattgcgctgtatcgcacctgtggttttgaggaggtcggccggcgcaagtcc…	MIALPMSVVLPMQEEDLDEVAACEARATAFAWSRQHFADSLAAGYACWLMRRDGELVGQAVVMNVLDEAHLLIISVALEWRRRGFARQLLAHLRSHAREVGVAQLFLEVRASNEAAIALYRTCGFEEVGRRKSYYPAPGGLREDALVLRCVP
NODE_106_length_90329_cov_7.03585_ID_305	fig|857335.5.peg.48	NODE_106_length_90329_cov_7.03585_ID_305_15384_14710	15384	14710	-	TsaB protein, required for threonylcarbamoyladenosine (t(6)A) formation in tRNA	FIG00000247	atgaaaatcctagccatcgaatcctctaccgaagttgcatctcttgccctgcgttggggcgacgaagtgcgtagcgtgcggctgcccagtccgcccgcacattcggccaccttgttgccggcgttgcatgccctgctggccgaagcgggggcttcgctgtcggcgctcgatcgtctggcctgcggtatcgggccgggggcgttcaccggcgttcggctggcctgcagcgtggcgcaggggctggcattgggggcggacctgccggtggccagcgtatgcagtctgctggtgctggcgcaagcgcaagcggcttctcaagtgtatgtcgcgatggatgcgcggatgggagaggtctatgccgctcagtatcggaaaactgcccagggctgggataccgta…	MKILAIESSTEVASLALRWGDEVRSVRLPSPPAHSATLLPALHALLAEAGASLSALDRLACGIGPGAFTGVRLACSVAQGLALGADLPVASVCSLLVLAQAQAASQVYVAMDARMGEVYAAQYRKTAQGWDTVLEPCCVAPEAMPGVEAGWFGAGTAFQAYAEQTARLQERLSGIDAQAVPDARALLELAAYVEARDAALLAPLYVRDRVALTTAERLAAGGRA
NODE_106_length_90329_cov_7.03585_ID_305	fig|857335.5.peg.49	NODE_106_length_90329_cov_7.03585_ID_305_15522_15397	15522	15397	-	hypothetical protein		gtgaatccccgagcatggattcctatgaagtctttccctttcctgctgctgcctgtttgttgtgtcctgctgtcgcatgcggcgctggcgcaggatgcgccgcgtgagcgtggccggctgcggtag	MNPRAWIPMKSFPFLLLPVCCVLLSHAALAQDAPRERGRLR
NODE_106_length_90329_cov_7.03585_ID_305	fig|857335.5.peg.50	NODE_106_length_90329_cov_7.03585_ID_305_15692_16405	15692	16405	+	Two-component system response regulator OmpR	FIG00635197	atggaagaacgttaccgcattctcgtcgtcgatgatgacgcccgcctgcgcagcctgctcgatcgttatctcggcgagcaagggttccaggtcaaggccgtggcggatgccgcgcagatggatcgtgcgctggcacgcgaacaccacgacctgatcgtgctggacctgatgctgcctggggaagatgggctctccatctgccgccggctgcgcgcctcgcgcaacgaaacccccatcgtgatgctcactgcgcgtagcgaggatgtggatcgcatcatcgggctggagctgggggccgacgattacctgcccaaacccttcaatccccgcgaactgcttgcacgcatccatgccgtgctgcgtcgccggccacgcgtgcagccaggggcgccagtcgaa…	MEERYRILVVDDDARLRSLLDRYLGEQGFQVKAVADAAQMDRALAREHHDLIVLDLMLPGEDGLSICRRLRASRNETPIVMLTARSEDVDRIIGLELGADDYLPKPFNPRELLARIHAVLRRRPRVQPGAPVEGGVVRFGQIEVNLTTRELRRDGQALSLTTGEFALLKVLLQHPKEPLSRDKLMELARGREYDAFDRAIDVQISRLRKLVEPDPAKPRYLQTVWGFGYVFVPDEAA
NODE_106_length_90329_cov_7.03585_ID_305	fig|857335.5.peg.51	NODE_106_length_90329_cov_7.03585_ID_305_16412_17245	16412	17245	+	Osmolarity sensory histidine kinase EnvZ	FIG00905561	atgcattttcgtccctggccgcgtaccctgctgtggcgcagcttcctgctgatctcgttgctgctgggcgcttccctcttcgcctggatgcagatctaccagcagttcgcgctcaaaccgcgctccgaacagatttcgcgcctggtggtcagcgtggtgaatctgacgcgcgccgcgctcatcgcggcggatgccgggcagcgcctagcgctgctgcgcgatctgcgccacgaggaaggcatccgggtattgccggcggaaactgacgatgagaccacagcgctgccggacaacgaggccatgctgttgctggagcagcgcgtgcgtgcccgcctgggcggctacacgcgttttgccgccaggctcaacgatcagccgggcttcttcgtcagcttccgt…	MHFRPWPRTLLWRSFLLISLLLGASLFAWMQIYQQFALKPRSEQISRLVVSVVNLTRAALIAADAGQRLALLRDLRHEEGIRVLPAETDDETTALPDNEAMLLLEQRVRARLGGYTRFAARLNDQPGFFVSFRVDEQDEQDEYWLMLPSERVERASAAQWLGWGLVAVLASLLGAYLLVLGIARPLKALERGARAIGRGERPGPLPEQGAQEIVAVAQAFEQMSDDLAQLDSDRALILAGVSHDLRTPLARLRLGIEMSGAPRADIRRTARGYRSDG
NODE_106_length_90329_cov_7.03585_ID_305	fig|857335.5.peg.52	NODE_106_length_90329_cov_7.03585_ID_305_17238_17756	17238	17756	+	Osmolarity sensory histidine kinase EnvZ	FIG00905561	atgggtgaggacatcgacgagatggatcgcatcatccgtcagttcctcgatttcgcacgggatgcgcagaatgaaaattcagccaccaccgatcttgccgccctgctggatgaactcgctggtgcctatcggcgacgcggcgccagcatccaactcgaaaccacacgactggatgcacgggtgcgccccgaatcgctacgccgtgccatcaccaatctgatcgacaatgccttacgctatgccggcgaggacaaaccgctggatctttccctgcgccgtgcgggcaggaagctggaaatcgaagtggctgaccgcggccccggcattccggccagcgaggtcgaacggatcaagcgccccttcacccgcctggaggccgcccgcaccgatgcacgcggc…	MGEDIDEMDRIIRQFLDFARDAQNENSATTDLAALLDELAGAYRRRGASIQLETTRLDARVRPESLRRAITNLIDNALRYAGEDKPLDLSLRRAGRKLEIEVADRGPGIPASEVERIKRPFTRLEAARTDARGSGLGLAIVERIARHHGGSLALLPRPGGGLRAILHLPLSD
NODE_106_length_90329_cov_7.03585_ID_305	fig|857335.5.peg.53	NODE_106_length_90329_cov_7.03585_ID_305_17815_18456	17815	18456	+	Intracellular septation protein IspA	FIG00002286	atgaagctattcttcgatctcttcccggtagcgctcttctacgccaccttccagtacgcacgcgcaaatgccgaacttgctgccgccaaggcgaccgcctggttcggtttcatagtttcgggcggcgtggtaggccccaaggaagcaccgaccattctcgccaccgtggtggtggtactggccattgcggcgcagatcgcctggctgctggccagacgcaaacccgtcagcgcgatcctgtgggtcagtctggcagcggcagccgtattcggcgaagccaccgtctggttccatgatccggccttcatcaaatggaagttcagcctcgtctattggctgatggggatctcgttctgggtcagtgcgcaattcttcggcaagaatctgatcaaggccctc…	MKLFFDLFPVALFYATFQYARANAELAAAKATAWFGFIVSGGVVGPKEAPTILATVVVVLAIAAQIAWLLARRKPVSAILWVSLAAAAVFGEATVWFHDPAFIKWKFSLVYWLMGISFWVSAQFFGKNLIKALMAESLALPDTGWRSLNLAWIAFFLFMGALNLLVAYNFSENVWFNFKMFGSMGLMLLFVLGQGLYLSRYLKQEATDNQGQA
NODE_106_length_90329_cov_7.03585_ID_305	fig|857335.5.peg.54	NODE_106_length_90329_cov_7.03585_ID_305_18464_18736	18464	18736	+	Cell division protein BolA	FIG00021808	atgagcacactcgaagaaatccgtaccagcctggccacgttgcaacccagcgtgtgcgagatcgaggacgaaagccatcgccatgccggtcatgccggcgcgcgtggcggcggcggtcatttccgcctgcgtatcgtctccgcacatttcaatggtctgccgcttctggctcggcaccgcctgatccatacgacattgggcgccctcatgcagggccccattcatgcattgagcattaccgcttcgacaccggaagaggcgagcagccactga	MSTLEEIRTSLATLQPSVCEIEDESHRHAGHAGARGGGGHFRLRIVSAHFNGLPLLARHRLIHTTLGALMQGPIHALSITASTPEEASSH
NODE_106_length_90329_cov_7.03585_ID_305	fig|857335.5.peg.55	NODE_106_length_90329_cov_7.03585_ID_305_18784_19605	18784	19605	+	PpiC-type peptidyl-prolyl cis-trans isomerase		atgaagaccaagctgagtcaccttgccattgccctcgttctcgccgcaaccggcggccatgccgctgctcaggcgaccaagcctgctgccacagccgccgccactgcgcctaaggctgttgccaaggtgaatggcaccacgatcacggccgacgtagccgagctgatgatccaggaacaactgtctcagggcgcgccgaacaatgaagaactgcgtcaggccgttcgcaacgagctcatccagcgtgaagtgctggcccaggaagcccgtcgcctcggtttcgagaagcgcaacaatgttgccgcacgcctgacactgacccgccagggcgtactcgtcggtggctacatcgatgactggatgcgcaagaaccccatcagcgatgccgccctgcaggct…	MKTKLSHLAIALVLAATGGHAAAQATKPAATAAATAPKAVAKVNGTTITADVAELMIQEQLSQGAPNNEELRQAVRNELIQREVLAQEARRLGFEKRNNVAARLTLTRQGVLVGGYIDDWMRKNPISDAALQAEYGRLSAAMAPNEYQVRHIQTEKEDAARTIIQKLQSGSRFEDLAKESIDEGSRDKGGEIGWISPRGVPEAFAKAIESLEKGKFTPTPVQTPFGFHVIKLEDVRKSTPPKFEEVREEIRSRLSQQQLNKHIQELVAKAKVE
NODE_106_length_90329_cov_7.03585_ID_305	fig|857335.5.peg.56	NODE_106_length_90329_cov_7.03585_ID_305_20011_20805	20011	20805	+	Enoyl-[acyl-carrier-protein] reductase [NADH] (EC 1.3.1.9)	FIG00000524	atgggttttctagccggcaagcggatcctgatttgtggtctgctgagcaatcgttcgattgcttacggggttgccaaggccatgcatcgcgaaggtgccgagctcgccttcacctatcagcacgaacgcttcaaggatcgcgtcagtgaaatggcgcatgaattcggcagcgagctaatctacccctgtgacgttcaggaggatgaacagatcgctgcactgatcaccgcattggagcaggactggaacgacggcttcgacagcatcgtgcactcgcttgccttcgcccctggagaggccctgcacggcgatttccttgaaggtttctcgcgtgaagccttccgtactgcacatgaaatcagcagttacagcttccccgcgctggccaaggcggcccgg…	MGFLAGKRILICGLLSNRSIAYGVAKAMHREGAELAFTYQHERFKDRVSEMAHEFGSELIYPCDVQEDEQIAALITALEQDWNDGFDSIVHSLAFAPGEALHGDFLEGFSREAFRTAHEISSYSFPALAKAARPLMRGRKASLLTLSYLGAVRTLPNYNVMGLAKASLEASVRYMANALGPEGIRVNAISAGPIRTLAASGIGSFGKLLAFNERNAPLRRNVTIEEVGNAAAFLCSDLASGTTAEIMYVDGGFNSVAIGTDEPL
NODE_106_length_90329_cov_7.03585_ID_305	fig|857335.5.peg.57	NODE_106_length_90329_cov_7.03585_ID_305_21097_20873	21097	20873	-	hypothetical protein		atgaagattctgatgttcgcgttgggtctgggcgtattggcaacgccggctctggccgccaagtcctgcgatgagctcaaggccgagatcgaagcaaagatccaggccaatggcgtgcccagtttcagtctcgagatcgtggacaaggggcaggccccggcggacaccaaggtcgtcggcagttgcggtggcggaaccaaggagatcgcttacaagcgcctttga	MKILMFALGLGVLATPALAAKSCDELKAEIEAKIQANGVPSFSLEIVDKGQAPADTKVVGSCGGGTKEIAYKRL
NODE_106_length_90329_cov_7.03585_ID_305	fig|857335.5.peg.58	NODE_106_length_90329_cov_7.03585_ID_305_21966_21202	21966	21202	-	Sulfur carrier protein adenylyltransferase ThiF	FIG00001002	atggatgatcaggaactgctgcgctattcgcgccatatcctgttgcccgagatcgacgtggccgggcaggaggcaatccgcgcggcacgcgtgctgatcgttggcgctggcgggcttggctcaccggcagcgctgtatctggctgccgcgggtgtcggacagatcgtgttgtgcgatggcgacgaggtggatctttccaacctgcagcgtcagatcctgcacgaactggcgagcgtgggagagaacaaggctaagtccggcaaacgtgcgctggaaaggatcaatccgttggtgcgtgtccatgccctgccgcagcggctggacgcccacacgctgatcgagcatgtcgccgaggtggatgtggtactcgattgttgcgacaattttgtgacgcgccat…	MDDQELLRYSRHILLPEIDVAGQEAIRAARVLIVGAGGLGSPAALYLAAAGVGQIVLCDGDEVDLSNLQRQILHELASVGENKAKSGKRALERINPLVRVHALPQRLDAHTLIEHVAEVDVVLDCCDNFVTRHAVNRACVQARKPLVSGSAIRFDGQLAVFDLRDEGSACYHCLFPDGEEVAELRCAVTGVFAPLTGIIGASQAAEALKLIAGFGQSLQGRLLLLDGLRMRWREVRYGRDASCAVCGAQASCHA
NODE_106_length_90329_cov_7.03585_ID_305	fig|857335.5.peg.59	NODE_106_length_90329_cov_7.03585_ID_305_22341_21973	22341	21973	-	Chemotaxis regulator - transmits chemoreceptor signals to flagelllar motor components CheY		gtgctcatcgtcgatgacaatgacaccacgcgtgcgatgttgcgcgcgatcctgcgtaccgagggcctcaatgtgatcggagaagcgcgagatggcgacactgccatcgaactggtgcgcaagcagcggccgggactggtctgcctggatgtgatgatgcccagtattggcggcatcgaggttctcacccggatcaagactgagcagccggatatacgagtgttgatgatcagcggttccaccgatcgggatacggtcaaggccgccatcgatggtggggcaaatggctatctggtcaaaccgttcaacagtgccagggtgatggctgccatcggggtcgccctttcccgttcgcgttcatcgagttga	MLIVDDNDTTRAMLRAILRTEGLNVIGEARDGDTAIELVRKQRPGLVCLDVMMPSIGGIEVLTRIKTEQPDIRVLMISGSTDRDTVKAAIDGGANGYLVKPFNSARVMAAIGVALSRSRSSS
NODE_106_length_90329_cov_7.03585_ID_305	fig|857335.5.peg.60	NODE_106_length_90329_cov_7.03585_ID_305_23327_22371	23327	22371	-	Phytochrome-like protein; Cph2		atgaaagctctggtcattgacgacatgctcacaagcgccacggtgatcagccaccagttgcgctgcatgggcatcgagccgctggtggccagcgatgggcctgcgggaatcgagctcttcaaggagctgcgccccgagttgatcctgctggatgtgcagatgcctggcatggatggattcgagaccgccagacggctacgtcagctcgaacgcgatggcgaatggactcccatcatcttcctggcatcccgggccagcgatgaagagctggaacgtgccatttccgtcggcagtgatgatttcctcgtcaaacctgtttccgagatggtgttgaccgccaaggtgcgcgccatgcagcgcatctcgcagatgcgtcattccctggtggtactgacccgg…	MKALVIDDMLTSATVISHQLRCMGIEPLVASDGPAGIELFKELRPELILLDVQMPGMDGFETARRLRQLERDGEWTPIIFLASRASDEELERAISVGSDDFLVKPVSEMVLTAKVRAMQRISQMRHSLVVLTRRLDEANRELLRLSLVDGLTGVANRRQFDESLRREWARGIRTSASLSLLMCDVDCFKQYNDRYGHQRGDECLRQVSQVLESGVRRPADLIARYGGEEFVAILPDTELDGALSVAEEIRSALEARAIPHDASPAGLVTLSIGAASVVPRRDGYTSARLLADADAALYRAKQAGRNRVHAAVPGEGRD
NODE_106_length_90329_cov_7.03585_ID_305	fig|857335.5.peg.61	NODE_106_length_90329_cov_7.03585_ID_305_24847_23540	24847	23540	-	FIG001826: putative inner membrane protein		atgagccagcccgagattgatgtcgttccgccgcctgcagacaagccatgcctgcccgtcgagtccgacgagttgcggttcatccagcgcgtggcgcgtctgctgctgcattacaacatgcgcaccgagagcttgcgcaagcgcttgcaggaggtgggcaatgcgttatggctgccactgcaggtgcatatcggctaccgcacggtaacggtgtataccgccgatggcgtacatgtacatgcccaggcaccggaattccgcatcaacatcgctgtcagcgcggaggtcaatcgcatcatcgatcgtgtctgtctgggccgattgccgctgcacgaggccatcgtgctgcttgatgaggtggagaagaccgccggtcggcacggccgctggacgctctct…	MSQPEIDVVPPPADKPCLPVESDELRFIQRVARLLLHYNMRTESLRKRLQEVGNALWLPLQVHIGYRTVTVYTADGVHVHAQAPEFRINIAVSAEVNRIIDRVCLGRLPLHEAIVLLDEVEKTAGRHGRWTLSLMFGLGAGALAWLLSADWGAMAVISLSSALGMLARQEMHRFHPVLFALPFVAALIGSLMGGGVILMGWTQTPGICLIVPALMLVPGPHLINGLYDMLENKMQTGIPRLGLATGILIAAAMGIFLGGWLTLGMTTVPPWATVAGTVPLWLDVLLAGVASCAFGAFYNAPWRVLWTSILCGMVGHGIRYICMDVNGMPQEISTLLACVPIGLMASRWVVSMRIPFAAVAFAGAVPMMPGVLMYRSIGGAMEIALAGGGAPAGLVASTL…
NODE_106_length_90329_cov_7.03585_ID_305	fig|857335.5.peg.62	NODE_106_length_90329_cov_7.03585_ID_305_25030_25956	25030	25956	+	FIG00770383: hypothetical protein	FIG00770380	gtgaaaacatggctgaaaagaggggcggcccttctcatcacactggctctgctgggatggatcgcctcgggagcgcactggcgcagcgtgatcgacaagctgctcgggctggatgcactggcacttctgctggcgctggcagctttcgcagccagctacctgttgcgtgccgcacgcgtgcatgacgaattcgccgcggagaccggtgccggcttcgccgccttcctgcgcctcacgctgctgcacaacgcctcgatcaacgtactgcccttccgcagtggcgaggcaacctttcccctgctgctcaaccgctggttcggcgtaccgaccacgcgtgcggtggttgccctcctctggctgcgcatccaggatgctttcgtggtgctggcgctggcggca…	MKTWLKRGAALLITLALLGWIASGAHWRSVIDKLLGLDALALLLALAAFAASYLLRAARVHDEFAAETGAGFAAFLRLTLLHNASINVLPFRSGEATFPLLLNRWFGVPTTRAVVALLWLRIQDAFVVLALAAFVWPGLHWLLRLGWIGMVAIAAWAIPVWARRHPELEIQAGRFAATVHRIRAALAESTRRNTRSWIWTIANWSVKLAAQAWLLAALLGSQLATGLAGALGVELAAILPIQGVAGFGTYEAGGAALLAPHGVPFATGLNAALALHLFVIAAALVAGGLGAALLPAPKPRQSSDGSSS
NODE_106_length_90329_cov_7.03585_ID_305	fig|857335.5.peg.63	NODE_106_length_90329_cov_7.03585_ID_305_25953_26960	25953	26960	+	Glycosyl transferase, family 2	FIG00454917	atgagcgaaaacatctccatccccgcccacagtctctccatcgtgattccgatgtacaacgaggccgaaaacgtcgaaccgatgatcacccgcgtgcatgaaggcttggcggcttatccgcatccctgggaactgatcctggttgacgacggcagcgcagatgccacgcctgccgaactcaggcgtgtcggcgcgaagttcggcgcacacgtacgcgtggtcgagctggcgcgcaacttccgccagacggccgccatgcaggccggcatcgatgccgcgcgcggcgacgtgatcgtgaccctggacggcgatctgcagaatgaccccaaggacatcccgcgcatggtcgcacgcctgctgaacgaagacctggacatggttgccggttggcgcaagaac…	MSENISIPAHSLSIVIPMYNEAENVEPMITRVHEGLAAYPHPWELILVDDGSADATPAELRRVGAKFGAHVRVVELARNFRQTAAMQAGIDAARGDVIVTLDGDLQNDPKDIPRMVARLLNEDLDMVAGWRKNRQDGLFLRKIPSRIANRLIARITGVKLNDYGCSLKAFRASVLKNVRLYGEMHRFIPAWLATVTTPRRIAEEVVTHHARQFGESKYGISRTFRVILDLISVYFFMRFRARPGHFFGGAGLILGAIGSAILAYMGFLKLVLGQSIGTRPLLLVGFFCIVMAVQFILSGVLGETLARIYFESGAGRLYTVRNPDQPGPDEAWHQV
NODE_106_length_90329_cov_7.03585_ID_305	fig|857335.5.peg.64	NODE_106_length_90329_cov_7.03585_ID_305_28320_26980	28320	26980	-	Chloride channel protein	FIG00731882	atgtcccgccctgtccgcttcctcgccgctctgcgacgcctgttctccagcctcgattcccgtctctatctcgcagtttcgcccggtagctggtgggcgcgcatgctgttcgttttgttggctctgactgccagcctggctgtggttgccctggctttgctggccgatgccgcagccagcctgtatggcttcatgacaagccacctgctctggttgccggtgctgctgatgccggccggctttgccttcaaccgctggttgaccgccaggttcttcgggggagtggaagggagcggaatcccgcaggtgattgcacagatccgggatggtcaccggctacccacggacgcggggcgcgtcggttggtggcgggcagtaggcaaactgctattgacgccg…	MSRPVRFLAALRRLFSSLDSRLYLAVSPGSWWARMLFVLLALTASLAVVALALLADAAASLYGFMTSHLLWLPVLLMPAGFAFNRWLTARFFGGVEGSGIPQVIAQIRDGHRLPTDAGRVGWWRAVGKLLLTPLSLAFGASAGCEGPSVFVGAALMHAGHRWRVIRRIASERQLLVAGGAVGIAAAFNTPLGGIMFAIEELSEKHRFHANAATLSAVIMAGLCSLALMGNYLYFGRSHDSLDILHQLPVVIVCGTLGGAGGGLFSWLALNWQRLLPVRVLGFASRRAFIFAALCGLGAGLLAWASAGLVAGSGYEAAHGVVSGEAGVPLWYAPAKLLATLLTFMSGIPAGIFAPSLSIGAGLSALAAGLFPGVSASVLALLCMVAYLSGMTHAPITAFT…
NODE_106_length_90329_cov_7.03585_ID_305	fig|857335.5.peg.65	NODE_106_length_90329_cov_7.03585_ID_305_31578_28375	31578	28375	-	diguanylate cyclase/phosphodiesterase (GGDEF & EAL domains) with PAS/PAC sensor(s)	FIG00561534	atgaggccgggattgccccgcagcggcctggcgctggtgatcggtgtcgtgggcatcctggtgatcggtttgatggcctggtcgcatgtgagctgggatcgcgccatccagaccagtctggttcagttggacagccttaaccagtcacgcgctgccgtagcgagtgcggaactgcttttggagcgggccgtgtcatcaccgactacggccaatccggaacagctggccggcgatctggcacgtgcgctggtattcgtacgaggcatgcgctcaggcgaaggcacgctggccggcatgcaggggcgtcagccgttcgcagcactggatgctgccctgcagcgctacgagcaaagcctgctggacgcagggcgccaggtgcagagccggctgcgtgtgccg…	MRPGLPRSGLALVIGVVGILVIGLMAWSHVSWDRAIQTSLVQLDSLNQSRAAVASAELLLERAVSSPTTANPEQLAGDLARALVFVRGMRSGEGTLAGMQGRQPFAALDAALQRYEQSLLDAGRQVQSRLRVPETVSPLDLRPQYAQVDAAAQAVEALLLRELSGLRQQQRMLDGLNILGAGLLYLVCIALLGLFQARNEAAYVSLVHSEAQLRAFAEAVPGMSFLLDRSGRYDGVYGSDDTLFGAPKESLLGRRLHDVLPLHLAERSVRLIVDALDSNEPRQIEYSLPVHGGLQHHFEGRICPLGDGSHVVWVSWDVSARWQAEQRVHVLKRLYEFLSNVNQAIVWSRDRDLLFSTICRTAVSIGGFGLAWVSWRNKGATGLDMVVRAGGEEIADETL…
NODE_106_length_90329_cov_7.03585_ID_305	fig|857335.5.peg.66	NODE_106_length_90329_cov_7.03585_ID_305_32420_31575	32420	31575	-	putative extracellular solute-binding protein		atggcggcgcttgcgctggcactggccatgacggcggtgctgggctggatttttttgccgacgggtgaggatgcgctggtacgggcacgggagggtaggacgttgcgcgtgggttacgcgctggaagcccccttcgtgatcctgtcaccgcaggtcgtcgctaacgatccggagctgcgcgaggccggcgtcggcggtgaagcgcccacggtgctgcgtgcggtactcgggcggttggggttcaaccgcgtcgaatggctgcgttccgatttcggtagcctgatccatgagctggaaagcgggcgcatcgacatcatcgccgccggcatgtacatcacgccggcacgcgaagtacgcgtgctgttctcgcgaccgacagcgcatgtgcggacgggcatg…	MAALALALAMTAVLGWIFLPTGEDALVRAREGRTLRVGYALEAPFVILSPQVVANDPELREAGVGGEAPTVLRAVLGRLGFNRVEWLRSDFGSLIHELESGRIDIIAAGMYITPAREVRVLFSRPTAHVRTGMLQLEGMDPPAKNLADLRSYPDRRLGVLAGAVELTLAGEAGLSPERVLAYPDAASALQALQNGRVEAMALSSVSLRYLEWMYPEGHFVLVDEAMPEAAPGRPALVFRKSDRRLRDAVDGVLAEYLGSAEHLAAVAEFGFTAADIPERAP
NODE_106_length_90329_cov_7.03585_ID_305	fig|857335.5.peg.67	NODE_106_length_90329_cov_7.03585_ID_305_34884_32608	34884	32608	-	ATP-dependent DNA helicase UvrD/PcrA	FIG00000372	atgtccaggctgcttgaaaacctcaatcccgaacaactcgccgccgtcaccctgccgccgcagccggcgctgatcctggcgggtgccggctcgggcaagacccgtgtgctcaccacacgcatcgcctggctgctgcagaccgggcaggccacgccagcgaacattctgggcgtgacctttaccaacaaggctgccaaggaaatgcttacgcgtctgggcgccatgctgccgatcaacacgcgcggcatgtggatcggcaccttccacggtctgtgcaaccggctgctgcgtgcgcactaccgcgaggccgcactgccgcagactttccagatactcgatacgacggatcaactggccgcgatcaaacgcctgctgaagacgctcaatatcgacgacgag…	MSRLLENLNPEQLAAVTLPPQPALILAGAGSGKTRVLTTRIAWLLQTGQATPANILGVTFTNKAAKEMLTRLGAMLPINTRGMWIGTFHGLCNRLLRAHYREAALPQTFQILDTTDQLAAIKRLLKTLNIDDEKFPPRELQHFINGNKEAGYRPAQVEAWDDYTRMRVELYKEYDDQCQREGVVDFPELLLRCYELLSRNEPVRRHYQLRFRHILVDEFQDTNRLQYLWLKLLAGHGEPARSHSPSPLTDEESLEHADGAARNWAAVFAVGDDDQSIYAFRGAEVGNMRDFEHEFGVSRVIRLEQNYRSHGNILDAANAIIANNSKRLGKNLWTDQGSGEPIRVYEAPTDIDEARWIVEEIQQLIRDGASRSDIALLYRSNAQSRVLEQQLFSAGVPYK…
NODE_106_length_90329_cov_7.03585_ID_305	fig|857335.5.peg.68	NODE_106_length_90329_cov_7.03585_ID_305_36416_34956	36416	34956	-	Succinate-semialdehyde dehydrogenase [NAD(P)+] (EC 1.2.1.16)		atgcctgagctcagcaatgcgttcctgtttcgccagcaggccttcatcgatggagcctggtgcgaggctgagagtggccggtacagcgaaatccgcgatccggccacgggactcctgatcggtcgggtgcctttgatgggggctgctgagaccgtgcgtgccatcgcggccgcgcagcatgcgatgcgtgcctggaagacccgcccggcacgtgagcgtgctgcggtgttgcggcgctggttcgaactggtgatggcgaatcaggaggatttggcgcgcatcatgtgtgcggagcaggggcggccgctgggcgaggctcgcggcgagatcgcgtatggcgcgagtttcatcgagtggttcagcgaagaagccaaacgcgtgtatggcgacaccatcccg…	MPELSNAFLFRQQAFIDGAWCEAESGRYSEIRDPATGLLIGRVPLMGAAETVRAIAAAQHAMRAWKTRPARERAAVLRRWFELVMANQEDLARIMCAEQGRPLGEARGEIAYGASFIEWFSEEAKRVYGDTIPSPSREQRVVVIKQPVGVVAAITPWNFPSAMVTRKASPALAAGCAVILKPAPQTPFSALALAYLAEQAGLPAGLLNVVTGDAVAIGGELTSNPAVAKLSFTGSTVTGRLLMAQCAPTIKKLSLELGGNAPFIVFNDADVDAAVAGALASKFRNNGQTCVCANRIYVQAGIYDAFARRLAEAAAALKVGIGSQEGVQIGPLIDTRALGKVESHVADALAQGGQLLTGGARHPLGHCFYQPTVIADAHAGMRLAHEETFGPVAALFRFE…
NODE_106_length_90329_cov_7.03585_ID_305	fig|857335.5.peg.69	NODE_106_length_90329_cov_7.03585_ID_305_37548_36523	37548	36523	-	Anthranilate phosphoribosyltransferase (EC 2.4.2.18)	FIG00062957	atgaccccgcaagaagccttgcaacgcgtgatcgagcattgtgagatctttcatgacgagatggtggatctgatgcgtcagatcatgtccgggcaggtatcaccggtgctgatcagcgccattaccatcgggttgcgcgtgaagaaggaaaccgtcggcgagatcgccgccgctgccaccgtgatgcgcgagctggctaccaaggtgccggtgaaggacagcgcgagcctggtcgatatcgtgggtaccggtggtgatggcgcgaataccttcaacatctccacagcctcgatgttcgtggctgccgctgctggtgcgcgcgtggccaagcatggcgggcgtgccgtgtcttcgcgctccggcgctgctgatgcgctggaagcgctgggtgtgaacctg…	MTPQEALQRVIEHCEIFHDEMVDLMRQIMSGQVSPVLISAITIGLRVKKETVGEIAAAATVMRELATKVPVKDSASLVDIVGTGGDGANTFNISTASMFVAAAAGARVAKHGGRAVSSRSGAADALEALGVNLSLTPEQIGQCIDTLGLGFMFAPNHHAAMKHAAPVRRELGVRTLFNILGPLTNPAGAANQVMGVFHQDLVGIQVRVLQRLGARNAMIVYGMKGLDEISISAPTLIGELRDGEVHEYRISPEDVGLPLHAASKLRAGSVDESREILLGALEGRLPAARDIVAFNAGASIYVSGQAASLADGVKKALDAIGSGAARRKLDEFVEYSRSLSN
NODE_106_length_90329_cov_7.03585_ID_305	fig|857335.5.peg.70	NODE_106_length_90329_cov_7.03585_ID_305_38806_37589	38806	37589	-	Na+/H+ antiporter		atggatcaagcctggacgatggtggtgctgagcctgatcgtgctcgtggcctatctgttcgacttcttcggccgcttcacacgggttccggccgtggtctcgctgatcttcacaggtctggttctgcgtgcggtggctgatgcagtcggctggcaattggcgctgcctgcgggtctgttaccggtgctggggaccttcggtctgatcctgatcgtgctcgaaggcacactggatctgcgcctcacgcgcgagcgcgtaccaatgattctgcgtgcagcaggctgcgcaaccctgggcgtcgtgctgaccggcgcattgtttgctggcgtgctggtgttgtggctgggcgccagctggcagcttgcggtggtacatgcgttgccattcgcggtgatcagt…	MDQAWTMVVLSLIVLVAYLFDFFGRFTRVPAVVSLIFTGLVLRAVADAVGWQLALPAGLLPVLGTFGLILIVLEGTLDLRLTRERVPMILRAAGCATLGVVLTGALFAGVLVLWLGASWQLAVVHALPFAVISSAVVIPAAVALSERLREFVIYESSISDIVGVVLFYALLREYSGPLDFVFSLGGELLLSVFVGLVMGLSIFWLIQRIEHHVRVLPMIFGITLLYSLGKILHLAPLVMVVLVGLLLNNSHLIARFSRGRLAERAQFEQDLESFKHLTVEFTFVVRSFFFVLLGFGVSAGELLSAPAWVMAVLLMGCSLLPRWALLRGVARERAQPLLWFAPRGLITVLLFMSIPESQRLEAFPVASLMLVILMGALLLTYGSLQSRSLLAADEASAQP…
NODE_106_length_90329_cov_7.03585_ID_305	fig|857335.5.peg.71	NODE_106_length_90329_cov_7.03585_ID_305_39416_38853	39416	38853	-	Anthranilate synthase, amidotransferase component (EC 4.1.3.27) @ Para-aminobenzoate synthase, amidotransferase component (EC 2.6.1.85)	FIG00132685	atgctgctgatgattgacaactatgacagtttcacctacaacctggtgcagtatttcggggagcttggcgccgacgtgcgcgtgtatcgcaacgacgccatcactgtttccgagatcgaagcgctggcgcccgagcgcatcgtgatttcccccggaccctgctcgccagccgaggccggcatctcggtgcaaaccatccgccatttcgccggcaaattgcccatcctcggcgtctgcctcgggcaccagagcattggcgcggccttcggcggcaagatcgtgcatgccaggcaactgatgcacggcaagacctctcccatcctgcatgccgacaaaggggtgtttcagggcttgccgaatcctttcatcgccacgcgctaccactcgctggccatcgag…	MLLMIDNYDSFTYNLVQYFGELGADVRVYRNDAITVSEIEALAPERIVISPGPCSPAEAGISVQTIRHFAGKLPILGVCLGHQSIGAAFGGKIVHARQLMHGKTSPILHADKGVFQGLPNPFIATRYHSLAIERESCPDSLEITAWTEDGEIMGVQHKTLPIEGVQFHPESICTEHGHRLLQNFLER
NODE_106_length_90329_cov_7.03585_ID_305	fig|857335.5.peg.72	NODE_106_length_90329_cov_7.03585_ID_305_41262_40579	41262	40579	-	hypothetical protein		atgaatacatgtctcgttgaaagcccgcaggctgaaagcttcatggaacttgcttccacgaataccggcagtgccgcatttttgggcgaccctgaacaattcgagtcgggcgcagggccggatattgcaaacgcaggcatcgcacttcgtcagaatgtggcgaaggttgctgcgttgaagaacgacccgacccgcaccgaagttcaaaagcacgaagccgccgcagttctggccgaacgcaccgttcaggcgctggaaaagtcgaaagcgtcaatcgaaagccgcgcgaatgaactttggaacagcgcggttacacaatccgaacttacttttgcgccgaagtctgaccgtggaacgcttgacggcgaaatccggcaataccttcgcgaacaggccgga…	MNTCLVESPQAESFMELASTNTGSAAFLGDPEQFESGAGPDIANAGIALRQNVAKVAALKNDPTRTEVQKHEAAAVLAERTVQALEKSKASIESRANELWNSAVTQSELTFAPKSDRGTLDGEIRQYLREQAGKPEGMMKIREAMKDKNVAGVVWHSPSFLLDINPANHQKLKVEVLEQHLPDAYKKVVDSLALRDLPAKYDKAINSVRTSFYNPALAAKAKLRVEV
NODE_106_length_90329_cov_7.03585_ID_305	fig|857335.5.peg.73	NODE_106_length_90329_cov_7.03585_ID_305_41450_41277	41450	41277	-	hypothetical protein		gtgggcaccaaacgcgaagcaatcaatgaagccgcgccgttactggccggaaccaagagggggcgatttatagagcttaatgacaaacgtatttttaaccgtgaaacaggcaagtttcttgacgaagaagccaacgaaacgccgggcggtctgaaagcgatttttaaacgctaa	MGTKREAINEAAPLLAGTKRGRFIELNDKRIFNRETGKFLDEEANETPGGLKAIFKR
NODE_106_length_90329_cov_7.03585_ID_305	fig|857335.5.peg.74	NODE_106_length_90329_cov_7.03585_ID_305_42254_42123	42254	42123	-	hypothetical protein		atgcaggcgcttacaactttattcgtacatgccgcaaattatgacgaagtaaaaagcgaatacaagatacgcgaacggcaacgcggcatcgtttgccagattgacgccgccattgccgcgcaacgcaagtaa	MQALTTLFVHAANYDEVKSEYKIRERQRGIVCQIDAAIAAQRK
NODE_106_length_90329_cov_7.03585_ID_305	fig|857335.5.peg.75	NODE_106_length_90329_cov_7.03585_ID_305_44650_44297	44650	44297	-	hypothetical protein		atgccaagactaaaacgcgaaccactggaacaagtacatgaaccctatctggaggccgaaagcggcgattggcgacgctttgccgacatgattgaacgcggcgaaccgttaccagaccttgctaggaagatgattgccgaacacttgcgcggcaacagcctgccgcctgttcgtcggaaacgttcgcagcaacggcaggaagctgcaatttgctatcgcgtattcgaacatatggaaaacaggctgtcgaagtacgccgccataaacgaagtttcggaaacgctaaaaatggaacccgaaacagtgaaaacgtaccttaagaactggaaacgagatttggaaaatatcaagtaa	MPRLKREPLEQVHEPYLEAESGDWRRFADMIERGEPLPDLARKMIAEHLRGNSLPPVRRKRSQQRQEAAICYRVFEHMENRLSKYAAINEVSETLKMEPETVKTYLKNWKRDLENIK
NODE_106_length_90329_cov_7.03585_ID_305	fig|857335.5.peg.76	NODE_106_length_90329_cov_7.03585_ID_305_45855_44638	45855	44638	-	Integrase	FIG01116662	atgccactaactgacgccaaaatccgcaccacgaagcccgcagacaagccgcagaagcttgcagacggcggcgggctgtaccttgaggttcgaccgaccggcgcgaagctttggcgctatcgctaccgcattgcaggcaaagagaacgtatttgccatcggcgactatccgaacatcggactttcagacgcacgcgaactgcaccgcaaggcgcggggcttggtcgaacaaggcattcacccttcgcacaatcggcaggccgaacggctggcgaacaacgccgcgaacgcaaacaccttcgaagccgtagcccgcgaatggatggcgaagaagtcggcaggatggacgccgtactatctgcgccaagttgaaaacttcctgtcgggcgacgtgttcccc…	MPLTDAKIRTTKPADKPQKLADGGGLYLEVRPTGAKLWRYRYRIAGKENVFAIGDYPNIGLSDARELHRKARGLVEQGIHPSHNRQAERLANNAANANTFEAVAREWMAKKSAGWTPYYLRQVENFLSGDVFPYVGKLPIRSVTAAHLLEIIRRIEGRGAETVALLVRQWSSAIFRYAVATLRADSDPAAALKGAIHRPKVEHRKPLSREQIAEFATALDEYGGYRTTVIALRLMLLTFVRTVELRKAEWSEFDLDRAEWRIPAERMKMREPHIVPLSRQAVELLRELHTHTGGRGLLFPNYRNPKECMTATTLNRALERMGFNGKDSIGFSAHGFRATASTILNEMGYQSDVIERQLAHAERNKVRTSYNQAEYMKDRRTMMQEWADMVENMMKPKEG…
NODE_106_length_90329_cov_7.03585_ID_305	fig|857335.5.peg.77	NODE_106_length_90329_cov_7.03585_ID_305_46627_46301	46627	46301	-	hypothetical protein		atgagagtcgatcttcaggttccgttcgcggagaaggatgaggcgaagcgcctgggcgcccgctgggaccctgcaaagcggctctggtatgtcaccaatccggcgaatctggcgatcttccgccgttggctgtctgacgacgacgccccgggggctgttcagcctgcgggctcccgcagcggttctggcaaggccccccggcaggatcgctccgctggcctgagcgtcaccggcgcggcgtatcttcccctagaatgcgattgtctgccctgggaaggctgctctcgctgccaggacgcgctggaaaagcgcggctggcgccgttga	MRVDLQVPFAEKDEAKRLGARWDPAKRLWYVTNPANLAIFRRWLSDDDAPGAVQPAGSRSGSGKAPRQDRSAGLSVTGAAYLPLECDCLPWEGCSRCQDALEKRGWRR
NODE_106_length_90329_cov_7.03585_ID_305	fig|857335.5.peg.78	NODE_106_length_90329_cov_7.03585_ID_305_47840_46746	47840	46746	-	ATPase, AFG1 family	FIG00001710	gtgaatcgtgaattcggcgtgcgtgatgcctacgccgccgcgctggggatccgtggttatcgggccgatgcggcgcaacggcaggccatcgaacgattgcagcgcctgtatgccgaactactggagttcaaggcaaggcgacgcaacaggttgcgcaagctgctcatccaccccgatctgccgcgcagtgtctatctgtggggcggggttgggcgcggcaagagttttctgatggattgcttcttcgacgcggtgccctatcagcgcaagcgtcgggtgcatttccatgccttcatgcaggagatccacgcctcattgcgtgtgcatcagacgcaggaggatccgcttgcacgcgtggcggatgacatcgcgaaagccacgcggctgttgtgcttcgat…	MNREFGVRDAYAAALGIRGYRADAAQRQAIERLQRLYAELLEFKARRRNRLRKLLIHPDLPRSVYLWGGVGRGKSFLMDCFFDAVPYQRKRRVHFHAFMQEIHASLRVHQTQEDPLARVADDIAKATRLLCFDEFHVADIADAMILGRLLQALFERGVVFVMTSNYPPDGLYPNGLQRQNFLPTIALIKQQFDVLEVEDGTDYRLRSLVQMDIFIVPADAAADAELAAHFGRMAANAGKPGEIVVQGRQLPVRRVAPGVVWFDFATLCGGPRAQADYLEIAREYHTLILSDVPVMKREQGNEARRFTWLVDVCYKARVKLLISAQAEAADLYREGPNAQEFPRTVSRLIEMRGAAYLGLAHRVS
NODE_106_length_90329_cov_7.03585_ID_305	fig|857335.5.peg.79	NODE_106_length_90329_cov_7.03585_ID_305_49105_47846	49105	47846	-	Dihydrolipoamide succinyltransferase component (E2) of 2-oxoglutarate dehydrogenase complex (EC 2.3.1.61)	FIG00127747	atgatcatcgaagtcaaagtgccgcagctctcggaatccgtatccgaggccacgctggtcagctggcatgcgcaggaggggcaggccgtcaagcgcgaccagaatctcatcgacatcgaaaccgacaaggtcgtgctggaaaccccggcgcccgccgatggcgtactggtcaagatcatcaaggccaacggcagctcggtcgccagcggtgagctgattgcccagatcgataccgaggccaaggctggcgcaagcgcccctgcctccgccgcaaccgctggcaaggccgccgtgcccgcaccggctgccgtcgctgcagcacctgcgggcactggcccggctgcacgcaagctgctggccgaacagggggtggatccggcaagcgtacagggcaccggc…	MIIEVKVPQLSESVSEATLVSWHAQEGQAVKRDQNLIDIETDKVVLETPAPADGVLVKIIKANGSSVASGELIAQIDTEAKAGASAPASAATAGKAAVPAPAAVAAAPAGTGPAARKLLAEQGVDPASVQGTGPGGRITKADALGLARPAPAASSATVAPVAAAPAQQANALPQPPVPPEVENALADRPEQRVPMSRLRARVAERLLQSQATNAILTTFNEVNMAPVMELRKKYQDKFEKEHGIKLGFMSFFVKAAVAALKKYPVLNASVDGNDIVYHGYFDIGIAVGSPRGLVVPILRNADQMSIAQIEKKIAEFGAKAKDGKLSLEELTGGTFSISNGGVFGSMLSTPIINPPQSAILGIHATKDRPVVENGQIVIRPINYLAMSYDHRIIDGREAV…
NODE_106_length_90329_cov_7.03585_ID_305	fig|857335.5.peg.80	NODE_106_length_90329_cov_7.03585_ID_305_51990_49141	51990	49141	-	2-oxoglutarate dehydrogenase E1 component (EC 1.2.4.2)	FIG00000541	atgagacagttccagctcaactcctacctgttcggagccaatgcgcctttcatcgaggaactctacgagacctacctcgagaatccggccagcgtgtcggaccagtggcgtgattacttcgactccctgcagaacctgcccggtgccgggcgcgacgtggcgcatgcgccagtgatcgcctccttcgcacagatcgccaagcagggaaaaccgctttccagtgcggtggcctcgccgggcatggcggacaagcgccagatcggcgtgctgcagatgatcaacgcctaccgtttcctcgggaaccactgggcgcagatcgatccgctcaagcgtcaggagcgcccgcccatcgcggagctggagccctcattttatggctttaccgaagcggacctctct…	MRQFQLNSYLFGANAPFIEELYETYLENPASVSDQWRDYFDSLQNLPGAGRDVAHAPVIASFAQIAKQGKPLSSAVASPGMADKRQIGVLQMINAYRFLGNHWAQIDPLKRQERPPIAELEPSFYGFTEADLSARFNMGSFQFQEGSQASLREILEAARQTYCGTLTVEYMYMADVQQKRWIQSRLEPIRSTPSFEVETRKRILERLTAAETLEKYLHTRYVGQKRFSLEGGESAIVAMDTFVNTAGSLGVQEILVGMAHRGRLNVLVNTLGKSPKMLFEEFEGKHVADLSAGDVKYHMGFSSDVNTPGGPVHLSLAFNPSHLEIVNPVVQGSVYARQRRRGEGAQNQVLPLLIHGDAAVPGQGINQELLNFSQTRGYGTGGSVHLVINNQIGFTTSDP…
NODE_106_length_90329_cov_7.03585_ID_305	fig|857335.5.peg.81	NODE_106_length_90329_cov_7.03585_ID_305_53357_52056	53357	52056	-	Citrate synthase (si) (EC 2.3.3.1)	FIG00130344	atgacgacgcagaaaaccgccaaactgtcattcaacgaccagtcctacgagttcccggtgatttccggcagtatcggccccgatgtcgtcgacatccgtacgctgtacggcaagaccggcgctttcaccttcgatcccggtttcatgtctacagcggcctgcaagtcgtccatcacctacatcgatggcgacaagggcgaactgctgtatcgcggttaccccatagagcagcttgcggtgcattgcaactatctcgaaacctgttatctgctgaagaacggcgagctgcccagcaagagcgagtatctggaattcgaaaaggtcgtacgcagccacaccatggtgcatgagcagctcacgcgcctgtaccagggcttccgtcgtgacgcgcacccgatg…	MTTQKTAKLSFNDQSYEFPVISGSIGPDVVDIRTLYGKTGAFTFDPGFMSTAACKSSITYIDGDKGELLYRGYPIEQLAVHCNYLETCYLLKNGELPSKSEYLEFEKVVRSHTMVHEQLTRLYQGFRRDAHPMSILVGVVGALAAYYQDSLDINNPDHRFIAATRLIAKMPTITAMAYKYTVGQPFMFPRNDLDYASNFLHMMFATPCEKYEPNPVLARALDRILILHADHEQNASTSTVRLSGSSGANPFACIAAGIACLWGPAHGGANEACLVMLDDIMKRGGVAKIGEFIKEVKDKNSNVKLMGFGHRVYKNYDPRAKLMRETCHEVLGELGLQNDPMFKLAMELEKIALEDEYFVSRKLYPNVDFYSGIVQKAMGIPVSLFTGIFAMARTIGWIA…
NODE_106_length_90329_cov_7.03585_ID_305	fig|857335.5.peg.82	NODE_106_length_90329_cov_7.03585_ID_305_53650_53354	53650	53354	-	YgfY COG2938		atggagacactggccgccttgcaggcgaaggttcgctggcgtgcccggcgagggctgctggagctggatcttttcttccagcgcttcatcgaccaggggcttgcacgactggacgaggaaagcctgcagactctgctcgaattgctcgaaagcgacgatcacgagttgtgggcaatgctcaatggcaaggcacaatgcagtgtcgagcgctggcagccgcttatcgcgctgctgcgacggagcgctccggacacatcacaggaaactgttcttctagagaaggaaaagcaagtatga	METLAALQAKVRWRARRGLLELDLFFQRFIDQGLARLDEESLQTLLELLESDDHELWAMLNGKAQCSVERWQPLIALLRRSAPDTSQETVLLEKEKQV
NODE_106_length_90329_cov_7.03585_ID_305	fig|857335.5.peg.83	NODE_106_length_90329_cov_7.03585_ID_305_54363_53653	54363	53653	-	Succinate dehydrogenase iron-sulfur protein (EC 1.3.99.1)	FIG00026006	atggcaaaccgcaccatcagcttcaagatctatcgttacgatcctgaccgcgacgccaagccctatatgcaggagctgtcgatcgagctggaccccaccgaccgcaagctgctcgacgcgctggtcaagctcaaggcgcaggatgattcgctggccttccgccgttcctgccgtgagggcgtctgcggctcggatgcgatgaacatcaacggcaagaatgggctggcctgtctgaccgatattgatagcctggcccagccggtggtgttgcgcccgttgccggggctgccggtaatccgcgatctgatcgtggacatgacgcagttcttcaagcagtaccactcgatcaagccctacgtggtcaacaacacaccggcccctgaaaaggagcgcctgcag…	MANRTISFKIYRYDPDRDAKPYMQELSIELDPTDRKLLDALVKLKAQDDSLAFRRSCREGVCGSDAMNINGKNGLACLTDIDSLAQPVVLRPLPGLPVIRDLIVDMTQFFKQYHSIKPYVVNNTPAPEKERLQSPEQREELNGLYECILCACCSTSCPSFWWNPDKFVGPAGLLAAYRFIADTRDEITNERLDNLEDPYRLFRCHTIMNCVDVCPKHLNPTKAIGKIKELMLSRAV
NODE_106_length_90329_cov_7.03585_ID_305	fig|857335.5.peg.84	NODE_106_length_90329_cov_7.03585_ID_305_56160_54385	56160	54385	-	Succinate dehydrogenase flavoprotein subunit (EC 1.3.99.1)	FIG00136922	gtgaacatcgccaagcgtaatttcgatgcagtgatcgtgggggccggcggtgccggcatgcgtgccgccgttggtctggcggagtccggcctgaagacggcggtgatctccaaggtgtttcccacgcgttcgcacaccgtggctgcccagggcggggtttcggcctcgctgggcaattccgagccggacgactggcgctggcacatgtacgacacagtcaagggttccgactggctcggcgatcaggacgcgatcgaattcatgtgcaaacaggcgccggaagtcgtgatcgagctcgagcattacggcatgccttttgaccgtaccgatgacggcaagatctatcagcgtccgttcggtggtcatatctcgaacttcggcgaaggcaagccggtgcgt…	MNIAKRNFDAVIVGAGGAGMRAAVGLAESGLKTAVISKVFPTRSHTVAAQGGVSASLGNSEPDDWRWHMYDTVKGSDWLGDQDAIEFMCKQAPEVVIELEHYGMPFDRTDDGKIYQRPFGGHISNFGEGKPVRRACAAADRTGHAMLHALYQRNVRANTQFFVEWLALDLLRAADGRVLGVIAMELESGELTLFQAKATLFATGGAGRIYHSSTNAFINTGDGLGMAARAGIPLEDMEFWQFHPTGVAGAGVLITEGVRGEGGILRNASGERFMERYAPNAKDLASRDVVSRAMVTEINEGRGCGPNRDHVLLDITHLDPNIIMTRLPGIREISIQFAGTDPIKAPIPVVPTCHYQMGGIPTNYNAEVVVHGEAVPGFYAAGECACASVHGANRLGTNS…
NODE_106_length_90329_cov_7.03585_ID_305	fig|857335.5.peg.85	NODE_106_length_90329_cov_7.03585_ID_305_56493_56161	56493	56161	-	Succinate dehydrogenase hydrophobic membrane anchor protein	FIG00000807	gtggtcggagcccactacggcttccgggattggctggcgcagcgtgtcactgccgtggtgatggcggtctacaccgtctacatgctcgtgcgcattgcgctgcttccggcgcatgacaatgaggcctggcgaaccctgatggcaggcggtttcacgaaattcgtgactttcctgtttgccctggccttgttctatcacgcgtgggtcggcatccgggatatctggatggattatgtacagcagatcagcctgcgtctgaccctgcacgtactgacccttctggccctggtcggctacgctggctgggtcgcacagattctgtggaggctctga	MVGAHYGFRDWLAQRVTAVVMAVYTVYMLVRIALLPAHDNEAWRTLMAGGFTKFVTFLFALALFYHAWVGIRDIWMDYVQQISLRLTLHVLTLLALVGYAGWVAQILWRL
NODE_106_length_90329_cov_7.03585_ID_305	fig|857335.5.peg.86	NODE_106_length_90329_cov_7.03585_ID_305_56912_56502	56912	56502	-	Succinate dehydrogenase cytochrome b-556 subunit	FIG00000800	atggcgcaagctgcggccgtcaaggccagacccaaatatctcaacgtgttcctgctcgggatcatgttgccggtgccggggttcgtgtcgatctttcatcgtgtcagcggcgcgggcctgtttctctgtatgcccttgttgatctggctgttcggcgcaagcctggggactcccgagcagttttccgcctaccggtcggccatggagttctccttgttgggcctgcccttggtcaagctgctgctgttggggttgctctgggcttacctgcatcacttctgcgcgggtattcgctttctgttgctggatatgcatatcggcgttgatcgtgcgccagcccgtgccagcgcctgggcggtgttcgccgtgagcctcacgctgacggtcgtgctggggggg…	MAQAAAVKARPKYLNVFLLGIMLPVPGFVSIFHRVSGAGLFLCMPLLIWLFGASLGTPEQFSAYRSAMEFSLLGLPLVKLLLLGLLWAYLHHFCAGIRFLLLDMHIGVDRAPARASAWAVFAVSLTLTVVLGGLTW
NODE_106_length_90329_cov_7.03585_ID_305	fig|857335.5.peg.87	NODE_106_length_90329_cov_7.03585_ID_305_57689_56961	57689	56961	-	Putative alkanesulfonate metabolism utilization regulator	FIG00452675	atggcacacaactcgccgactttcagccctttgtaccgacagatcaaggatctgatcgtgcgcgctctcgatgccggggaatggcttcccgggcaggcgattccgagtgagcaggtactggccgcgcgctttggcgtgagccagggcaccgtgcgcaaggcggtagatgaactggctgccgagaacatcctgatacgccgccagggcaagggtactttcgtctcttctcatcaggatccgcgggccgtatttcgctttctgcgtctgaaggccatcagcggcgggccggtgctgcccaagagccaacctttggaatgcatgcgtgccaaggccggccaggaggccgcgcgtaatctcggtgtggggccgggcagccctatcgtcatcgtgcgacgcgtg…	MAHNSPTFSPLYRQIKDLIVRALDAGEWLPGQAIPSEQVLAARFGVSQGTVRKAVDELAAENILIRRQGKGTFVSSHQDPRAVFRFLRLKAISGGPVLPKSQPLECMRAKAGQEAARNLGVGPGSPIVIVRRVLRLDGKPVVIDEMYLAAEVFPGLSLEMLRDWHGSLYSLFESRFGVRMVRATEKLRAVAAEKTVAEMLDVREGTPLLSVERVAYTYGDKPVEWRRGLYSTAEHYYVNELS
NODE_106_length_90329_cov_7.03585_ID_305	fig|857335.5.peg.88	NODE_106_length_90329_cov_7.03585_ID_305_57886_58878	57886	58878	+	Malate dehydrogenase (EC 1.1.1.37)	FIG00000455	atgtccaaatccccaatccgtgtcaccgtcaccggcgcagccggccagatcggttacagcttgctgttccgcatcgcctcgggcgaaatgctcggcaaggatcagccggtcatcctgcaactgctcgacctgccccaggcccagaaggctctggctggcgtgatcatggaactggaagactgtgccttcccgttgctggctggcgtgatcgccacggatgaccctgcggtcgccttcaaggacacccaggcagccctgctcgtcggcgcccgcccacgcggccccggcatggagcgcaaggatctgctggccgagaacgccaagattttcacggtgcagggtgcggccatcggccagtatgcccatctcgactgccgcgtgctggtggtgggcaaccct…	MSKSPIRVTVTGAAGQIGYSLLFRIASGEMLGKDQPVILQLLDLPQAQKALAGVIMELEDCAFPLLAGVIATDDPAVAFKDTQAALLVGARPRGPGMERKDLLAENAKIFTVQGAAIGQYAHLDCRVLVVGNPCNTNAYIAKESAKKFGRVPKKNFTAMLRLDHNRALSQLSAKTGRPVSSLKGLVVWGNHSPTMYADYRFVTSNGDSVKTLINDDTWNRDVFLPTVGKRGAAIIEARGLSSAASAANAAIDHMHDWFLGTNGEWVTMGIPSDGSYGIPAGIIYGVPVITSAGEYKRVEGLEIDAFSRERMDFTLKELEEERSAIADLLK
NODE_106_length_90329_cov_7.03585_ID_305	fig|857335.5.peg.89	NODE_106_length_90329_cov_7.03585_ID_305_58915_59901	58915	59901	+	Citrate lyase beta chain (EC 4.1.3.6)	FIG00010100	atgaccggcgcccaccccgacaaggtgctctacgcagaatcccgcgtattgcccgaactcgcggccgtggaacattacgccggcaacgagaagaccatgcgcaaggcgctcggcctgcaggccgagcgcggcgcgcttttcgacgtcacccttgattgcgaggatggcgctgcggctggcgccgagcgtgaccacgcggaactcatcggcgcactgatcatgagtgccgacaaccgtttcgaccgtgtcggcgcacgtatccacgacctcacacatccccactggcgcacggatcttgaacagatcatcggccttgcgggctcccggctggcctacgtggttttgcccaaggcccgtggcgcggccgacgtctcccgtgctttagcctgcatgcgcgaa…	MTGAHPDKVLYAESRVLPELAAVEHYAGNEKTMRKALGLQAERGALFDVTLDCEDGAAAGAERDHAELIGALIMSADNRFDRVGARIHDLTHPHWRTDLEQIIGLAGSRLAYVVLPKARGAADVSRALACMRELESRRDLPQIPLHVILETHGALHEAWDIANLPGVESLDFGLMDFVSAHHGALPAACMHSPLQFEHPLLVAAKTRTVSAALAHGIVPTHNVCTELTDSVQVEKDARRAREEFGFLRMWSIHPQQIDPILHGMQPAPTEVETAGEIVLAAQAADWAPIRHHDRLHDRASFRYYWDLLRRAHATGVPLPEDIQQRFFV
NODE_106_length_90329_cov_7.03585_ID_305	fig|857335.5.peg.90	NODE_106_length_90329_cov_7.03585_ID_305_59958_62573	59958	62573	+	Aconitate hydratase 2 (EC 4.2.1.3)	FIG00001520	gtgctcgtagcctatcgccaacacgtcactgagcgcgccgcgctcggcatcccccctcttgcgctggacgcccagcagaccgccgagctgatcgagttgctgaagaatccgcccgccggcgaagaggatttcctcgtcgaactgatcacgcatcgcgtccctccgggtgttgacgatgctgccaaggtcaaggcctcgttccttgccgccgttgcccacggcgaagccgccagtccgctgatcgacaaggccaaggccaccgagctgctgggcaccatggtagggggctacaacgtcaagccgctgatcgagctgctcgatgacgtctcgctggctccgattgccgctgccggcctgaagaagaccttgctgatgttcgatttcttccatgacgtggca…	MLVAYRQHVTERAALGIPPLALDAQQTAELIELLKNPPAGEEDFLVELITHRVPPGVDDAAKVKASFLAAVAHGEAASPLIDKAKATELLGTMVGGYNVKPLIELLDDVSLAPIAAAGLKKTLLMFDFFHDVAEKAKAGNAQAKAVVQSWADAEWFTSRPEVPASMKLTVFKVPGETNTDDLSPAPDAWSRPDIPLHSLAMLKNTRADAAFKPEEDGKRGPIQLIRDLAAKGNLVAYVADVVGTGSSRKSATNSVLWWTGEDIPFVPNKKFGGVCLGGKIAPIFFNTQEDAGALPIEIDVSKMDLGDEIELKVDHATGKVTTVKNGATISESHLKTLVLLDEVRAGGRINLIIGRSLTAKAREFLGLPASTLFRLPQDPIDSGKGFTLAQKMVGRAVGL…
NODE_106_length_90329_cov_7.03585_ID_305	fig|857335.5.peg.91	NODE_106_length_90329_cov_7.03585_ID_305_62964_63326	62964	63326	+	hypothetical protein		atgctgatcacattcaaatccgacgctgacggtgatgtcatcatgctcggcgacgtaggccagcaaatgctcgccatcctcggcaaagatgcagcggacagccggggcatcgtcacggtcgatcaactccccactgccattgcaagccttgaaaatgccatgcaggccgatcggcaggccgccctagaagaagcacggcacggtaacaaaaaggacagcgcccacacgccagccgatgagcacgacgacagctatcaggctgcgggagcaaccatccgtcttgcgcagcgcgcctttccgctgcttgccatgctgcgggcttcgctgaaagaaaccaagccagtgatctgggaggcccggtga	MLITFKSDADGDVIMLGDVGQQMLAILGKDAADSRGIVTVDQLPTAIASLENAMQADRQAALEEARHGNKKDSAHTPADEHDDSYQAAGATIRLAQRAFPLLAMLRASLKETKPVIWEAR
NODE_106_length_90329_cov_7.03585_ID_305	fig|857335.5.peg.92	NODE_106_length_90329_cov_7.03585_ID_305_63461_64306	63461	64306	+	Thioredoxin reductase (EC 1.8.1.9)		atgcaggtcaatttcctgaccaatgaatgggtgctcgggcatcgtggcatgaccggccaacaactggctgccaatttcgtcgcgcatgtcgaggcccttggcattcccattctttatgacagccgcccgaccaacatggaacgcctgtcagatggcaacctgcagatcacactggacacgccacacgggatatccggcttcgatgctggtgccgtcgtcatcgccaccggtacacgcttccgtgcgcgtgaaacgctgctctcggttcctggctttgcgcaatgcgatcaagggcgcatgcgttttggcccgcactgcttcactcatatagaaaccctggctggccagcgtctcctgatcatcggtggtggtgacaatgccttcgagaacgccacgctg…	MQVNFLTNEWVLGHRGMTGQQLAANFVAHVEALGIPILYDSRPTNMERLSDGNLQITLDTPHGISGFDAGAVVIATGTRFRARETLLSVPGFAQCDQGRMRFGPHCFTHIETLAGQRLLIIGGGDNAFENATLAHAAGAHVTVVARSVFHAQERFMTGMRTAGAKLHEHARLANLRPAPSGLLTTLETPQGNIEVEVDRLHLLAGYQPNTEFLSAVFGASIPPLQRDTEGYLQVDAQCRCSQPGFYAAGDVCNRLFPSVVSAISQGAQAARQIELDYSAPY
NODE_106_length_90329_cov_7.03585_ID_305	fig|857335.5.peg.93	NODE_106_length_90329_cov_7.03585_ID_305_64321_64965	64321	64965	+	Hypothetical metal-binding enzyme, YcbL homolog	FIG00146515	atggcattgcgttaccagatcatccccgtcacacccttcatgcagaactgcagcctgctgtggtgtgaccagaccatggaggctgccgttgtcgatccgggtggagacgtcgcgcgcatcgaagccgccgtgaatgccgctggcgtaaagctgggcaagattctgctcacccacggtcacctggatcatgtaggcggcaccgctgaactctccaggcgccatgacattcccatcgagggtccgcaacgggaagatgccttctggctcgacgccctggccgagcaatgccggatgttcggtttccctctggttgaaggtttcacccccacacgctggctggaggaaggcgacagcatccagatcggtgccgagcgcctggccgtgctgtacacgccgggc…	MALRYQIIPVTPFMQNCSLLWCDQTMEAAVVDPGGDVARIEAAVNAAGVKLGKILLTHGHLDHVGGTAELSRRHDIPIEGPQREDAFWLDALAEQCRMFGFPLVEGFTPTRWLEEGDSIQIGAERLAVLYTPGHTPGHVIFFHADTRLAIVGDVLFAGSVGRSDFPRGDHPTLIASIRSKLWPLGNDVRFIPGHGPMSSFGEERASNPFVADGV
NODE_106_length_90329_cov_7.03585_ID_305	fig|857335.5.peg.94	NODE_106_length_90329_cov_7.03585_ID_305_65113_65820	65113	65820	+	DNA-binding response regulator		atgcgcatcgtcgtgctcgaagataacctgactcaatctacactggtcaccgcttggctacgcaatgccggccatgacgttcatgagttcgcgctcacacgcgagctgcaacgcttttccagccgcgaaagcgtggatttgtacctgctcgactggatgatgcccgacatctccggcgaagccttcctgcgctggctacgcaacgaacgcaatgacgagacgccagcaatctttatcacctcgcgtgattcggaggacgacatcgtcaatgggctggctgccggcgccgatgacttcatcgtcaaaccggtcagccaacgcgtactgctctcgcgcatcgaagctgtgatccgtcgcagcaaaccgcgtgatcccatcgcaccgctggatctgccgccc…	MRIVVLEDNLTQSTLVTAWLRNAGHDVHEFALTRELQRFSSRESVDLYLLDWMMPDISGEAFLRWLRNERNDETPAIFITSRDSEDDIVNGLAAGADDFIVKPVSQRVLLSRIEAVIRRSKPRDPIAPLDLPPYLIDPEHKRITLNGQEVELTEKEFDLAVFMFRNLGRLLSRGHLLEAVWGRNPDLATRTVDTHVSRVRGKLQLKPENGFRLVPTYNFGYRLERAENETESNVA
NODE_106_length_90329_cov_7.03585_ID_305	fig|857335.5.peg.95	NODE_106_length_90329_cov_7.03585_ID_305_66675_65983	66675	65983	-	Lipoprotein releasing system ATP-binding protein LolD	FIG00000771	atgagtgagaatgccgtgaacgagatcgtgctgcgcgctgaggcgctgaccaagacctatggttcgggcgagacttcagtaccggtgctgcggggcgtgagccttgccgtgcagcgtggcgagacgctggccatcgttggggcttccggctcgggcaagagcacactgctgcatttgttgggtggcctggatacaccgactgctggcagtgtcgagcttctgggcaagcctttcacgcgtatgagcgaggccgagcgtggtcgtatgcgcaatcaggcgatgggcttcgtctatcagttccatcatctgctgcccgagttttctgcattggaaaacgtggccatgccgctggtgattcgtggcctggctacggctgacgcacatgcgcaggcagcgaag…	MSENAVNEIVLRAEALTKTYGSGETSVPVLRGVSLAVQRGETLAIVGASGSGKSTLLHLLGGLDTPTAGSVELLGKPFTRMSEAERGRMRNQAMGFVYQFHHLLPEFSALENVAMPLVIRGLATADAHAQAAKMLEAVGLGHRGEHTPGELSGGERQRAAIARALVTEPQVLLADEPTGNLDRHTAATVFGIMTELNQRLGTALIIVTHDLELARRAGRVLSITDGMLDA
NODE_106_length_90329_cov_7.03585_ID_305	fig|857335.5.peg.96	NODE_106_length_90329_cov_7.03585_ID_305_67921_66668	67921	66668	-	Lipoprotein releasing system transmembrane protein LolC	FIG00009971	atgaaatttcccatacttgtcgggctgcgctacgtgcgcgccaaacgccgcaatgcctcgggtggcagcttcatctccttcatctcctttgtctcgatggcgggtatcgcgctgggcgtgatggccctgatcgtggtgctgtcggtcatgaatggctttcaggacgagttgcgctcgcgcattctgggcgtggcagcgcatgcgcagatcatgggctacgacggtgagctgcgtgactgggaacaggtcgcgaagcttgccgaggggcgccccgaggtgttggcctcggctcccttcgtgcagcagcaggcgatgttctccatcgaccagagcgtgcgcggagccatcgtgcgcggcatcgatccggtgcgcgaggagggtgtagccgaattcgccagc…	MKFPILVGLRYVRAKRRNASGGSFISFISFVSMAGIALGVMALIVVLSVMNGFQDELRSRILGVAAHAQIMGYDGELRDWEQVAKLAEGRPEVLASAPFVQQQAMFSIDQSVRGAIVRGIDPVREEGVAEFASKMKAGVLTDLRPGEFGVILGRELAMALGARVGDKVTLIAPQGLVTPAAVLPRVKQFRLVGIFEAGMYEFDSGLALLNIQDAQVLYQMGDAVSGVRLRLKELFDAPRVSRQLSQQLPPDAYVTDWTQSHANFFRAVQMEKTVMFIILTLIVAVAAFNIVSALVMAVQDKRADIAILRTLGASPAAVMAIFVIQGAVMGLIGLGAGVVGGVSLALNITTVVPWIERTFGVQFLAKDVYYISDLPSKLLWGDVVGVVGVAFVLTLVATL…
NODE_106_length_90329_cov_7.03585_ID_305	fig|857335.5.peg.97	NODE_106_length_90329_cov_7.03585_ID_305_68221_69042	68221	69042	+	Regulatory protein, RpfE type		ttgcgccgtctgggggaagaagatggtgccgtacgccctggccgctggttatgtgccgatcccgtccatttgcatatgacacgcgatgcgcttctactgcgtggccccgatgagctcgacgtcgacacgcaggagagccttgccctggtcgataccctgaatcaggagttcagcgaattgggccaatttcacgtggccacgccacaacgctggtatctgcagttgcgcgggcccgctcaggccgacttccatccgctggtcgatgtactcgggcgccctgtcagccagttcacacccgaaggcacggacgcccgccgctggaatctgcacgccaacgccatccagatcctgctgcacaaccatccggtgaacgccgcgcgccaggcgcggggtgccctg…	MRRLGEEDGAVRPGRWLCADPVHLHMTRDALLLRGPDELDVDTQESLALVDTLNQEFSELGQFHVATPQRWYLQLRGPAQADFHPLVDVLGRPVSQFTPEGTDARRWNLHANAIQILLHNHPVNAARQARGALPINGLWLWGAGEPDTGLPALPAILSEDPLLRGFARHHGAGIVADADSLLASGGWWHDSRLHQAMLATDPHAWLTALAELEDVLFRPLLTAWRAGRIDALYLHAPGDQHALTATLTRRARWALWRRPLSPARLSALLQGSA
NODE_106_length_90329_cov_7.03585_ID_305	fig|857335.5.peg.98	NODE_106_length_90329_cov_7.03585_ID_305_69039_70748	69039	70748	+	Single-stranded-DNA-specific exonuclease RecJ (EC 3.1.-.-)	FIG00060517	atgacccgcctgcttcatcgccagaccgcccccaagctcgccagacagttgcagcaggggggattgcatccactgctcgctcgcctttatgccgcgcggggcatacacagcgtggcagagctgcgcgaggatctcggtggcctgctgccacccgccggtctcaaggatatcgaccgagcggccaccctgctcgccgacaccgtgatgcggggcgagcgcatcgtcatcgtcgccgactacgattgcgatggcgccaccgcctgcgccgtgggcatgcgtgcactgcgcatgatgggggcaatggacttgcattatttcgtgcccgatcgcgccatccatggctacggtctgtcgcccgccgtggtggcagaagtggcacagctgcaaccgcacctgttg…	MTRLLHRQTAPKLARQLQQGGLHPLLARLYAARGIHSVAELREDLGGLLPPAGLKDIDRAATLLADTVMRGERIVIVADYDCDGATACAVGMRALRMMGAMDLHYFVPDRAIHGYGLSPAVVAEVAQLQPHLLLTVDNGVASVSGVAAAQAAGMQVLVTDHHLPGDQLPDAEVIVNPNQPECGFASKALAGVGVMFYVALALRAELRARGWFNDARPEPNLASLLDLVALGTVADVVPLDANNRLLVRQGIARMRAGRMSAGVRALFAAAGRAPERASTFDMGFALGPRLNAAGRLTDMRLGIECLLTDDFARALNLARELDSLNRERRNIEQEMREAAQLQLDVSALDNGPAISLFEPEWHQGVIGIVAGRIKDQTHRPTIAFARADDHDGDGELKGS…
NODE_106_length_90329_cov_7.03585_ID_305	fig|857335.5.peg.99	NODE_106_length_90329_cov_7.03585_ID_305_70862_72007	70862	72007	+	Methyl-accepting chemotaxis protein		atgaagccagccaccgcacaagaatcagccattactccgggtttctacctgatcgcactgatcaacctggtcctgctctccgccctcgccagcacctggtggataggcctcatcgcaggcctgctctgtgccggcctgctctggtggtgctggccgcgaccgcgcgtgacggaacaagttgtcgtcgacagcgagcctacacttcagcagcaggacaagcccgcacagcgctatctctccgtcgtgcacggcgtggttcccctttggcggcgccacatcatcgcggtacaggatcagatccgggatgccattgaggcattgaccggccgcttcgccgggctggcctcccagcttggtcgggttgcgggtggcaacagtggcagcgacgccgcattgcat…	MKPATAQESAITPGFYLIALINLVLLSALASTWWIGLIAGLLCAGLLWWCWPRPRVTEQVVVDSEPTLQQQDKPAQRYLSVVHGVVPLWRRHIIAVQDQIRDAIEALTGRFAGLASQLGRVAGGNSGSDAALHAVAEAERGLQEISATLGKTREVTDTLVNQITTVASHMSNLRQMAEQVGAIANQTNLLALNAAIEAARAGEAGRGFAVVADEVRKLSSQSADTGKHISQTIKAVDEAMQHALDLSRSTASEQQDMVQRSEVTADSIINEFRAVTEAMQQEMQTLQEERQSVQGDLEQVLISLQFQDRVNQIIEHVSKDMARLDELSQRASTNGLSNVEIGSAEEWQAKLAASYTMLEQHQVHQGQNTGRVAPSEAITFF
NODE_106_length_90329_cov_7.03585_ID_305	fig|857335.5.peg.100	NODE_106_length_90329_cov_7.03585_ID_305_72026_72331	72026	72331	+	Chemotaxis regulator - transmits chemoreceptor signals to flagelllar motor components CheY	FIG00000426	atggcaaaaacgatcctgatcgttgacgactcgatgagcctgcgcaccaccctgggcatcgcactcaagggcgcgggctacgatgtggtcgaggccgtggatggcaaggatggccttaccaagctcgacggccgcaagtacaacctgatcatctccgatgtaaacatgcccaacatggacgggctcagcttcgtgaagtccgcgaaggccatgcaggcctaccgcttcacgccgatcctgatgctcaccaccgaaggggatgccaccaagatggcggaaggcaaggctgcaggcgtacgcgtctag	MAKTILIVDDSMSLRTTLGIALKGAGYDVVEAVDGKDGLTKLDGRKYNLIISDVNMPNMDGLSFVKSAKAMQAYRFTPILMLTTEGDATKMAEGKAAGVRV
NODE_106_length_90329_cov_7.03585_ID_305	fig|857335.5.peg.101	NODE_106_length_90329_cov_7.03585_ID_305_72414_72710	72414	72710	+	hypothetical protein		atgagcctttccatcctcacgccaggcccacagatgctcgccgaactctcgggtgagctgaccgtcgcgcaagcggcggaagtccgtgacgcgctggctctggcgctcacgacctcggagcagctcaccctggatctggggggcctcgaggaaatcgacgtggccggactgcaagtgttgctggcactggccagcgaacctcatcccgtccatttcaccaatccatccccttttttgctgcgccttgccgggttgctgcagcttgagcccctgcagcaacgcttctccacgaactag	MSLSILTPGPQMLAELSGELTVAQAAEVRDALALALTTSEQLTLDLGGLEEIDVAGLQVLLALASEPHPVHFTNPSPFLLRLAGLLQLEPLQQRFSTN
NODE_106_length_90329_cov_7.03585_ID_305	fig|857335.5.peg.102	NODE_106_length_90329_cov_7.03585_ID_305_72719_74734	72719	74734	+	Signal transduction histidine kinase CheA (EC 2.7.3.-)	FIG00000571	atgatcgacaatccggctgcacaccacgcgttggtcgaagagtcccgggaattgctcgatgcgatggatgccgcactgcttgcacttgagaagggcgggcgcgacacggaacacatcaacgccgtattccgcgcagcgcataccatcaaaggctcggcaggacttttcggcctcgccctgatcgtggatttcacacacattgccgaaagcgtgctggtgcgagtgcgtaatggcgaaattccgctggaccccgacctgctctcgctgcttttcgattgcggcgcctatctgcgcgacctgatcgacgcactggctgaaagcacccatccgaccgaccccgatgccgcacaacgcgcaacgctgatcgccggtctgcacacttatctgggcgggcctccc…	MIDNPAAHHALVEESRELLDAMDAALLALEKGGRDTEHINAVFRAAHTIKGSAGLFGLALIVDFTHIAESVLVRVRNGEIPLDPDLLSLLFDCGAYLRDLIDALAESTHPTDPDAAQRATLIAGLHTYLGGPPASVATTSETPRNDEGGAQRWSIHLGFYADALRDGMDPLSFIQYLERLGDLHDIRTDISRLPALADLDPESCYLQFDLLLETQATREEIASTFEFVAEGSDIRIEPAALQASPVLPPPGEIHLADIDRPPATERRGGLRQTMVKVEARKLDELIDTVGELVIAAASGRMFVGKKQFDAVHEVMGEIEKLVEQIRNKSLNLRMTPIGDIFQRFPRIVRDVAKDLGKKIELSISGADAELDKSMIEKLADPLLHIVRNAIDHGIEPVEQ…
NODE_106_length_90329_cov_7.03585_ID_305	fig|857335.5.peg.103	NODE_106_length_90329_cov_7.03585_ID_305_74750_76366	74750	76366	+	Methyl-accepting chemotaxis protein I (serine chemoreceptor protein)	FIG00005728	atgaaactcgtgcacaagatgctgttgatgattgccgtcgcgctcgcaggcatcgccttcctgtcctggttctcctccagggaaaccgaacgggtctatcaggtcaccaactttgcgaacctgaacaccgtgcccagcatgctggtgatgaacgatctcaacgatccatatgccaagaaccgcgtactgctgtggcgcctggccatctcctgggagaaaaaggatcgagacgaccgcctggccgaactggaaagcaacgaaaagaagatctttgcggccttcgacgcctacgacaaactggtcagcgacgaaaaggacgccgcgatgctcaagggtctgcgtgacggctatgccgaataccagacgttcaaacacaaggtcatcgaggaagtgctccga…	MKLVHKMLLMIAVALAGIAFLSWFSSRETERVYQVTNFANLNTVPSMLVMNDLNDPYAKNRVLLWRLAISWEKKDRDDRLAELESNEKKIFAAFDAYDKLVSDEKDAAMLKGLRDGYAEYQTFKHKVIEEVLRTNADRIAKTEHLAVLMREHATYTRKFNDAIQAILDYNAGLGQAKAKEAEETRHRAATITLAAAAACLLLVFGIGGYVLVSVLRQLGGEPDYVAEIARQVAQGNLTVEVKTRHPRSVLGAMQSMVERLSTVMMQVRASADALATASEELASSSTSLAQNSGNQAASVEETSASMEEISATVMQNAENARVTDGMASKSADEARQGGTAVADTVSAMRQIAEKIGVVNSIAYKTNLLALNAAIEAGRTGEHGKGFAVVASEVGKLADR…
NODE_106_length_90329_cov_7.03585_ID_305	fig|857335.5.peg.104	NODE_106_length_90329_cov_7.03585_ID_305_76375_76914	76375	76914	+	Positive regulator of CheA protein activity (CheW)	FIG00000652	atgaccgccgtcgaatccacttcgcgccgctatctgaccttcagcctgcacaaggagatcttcgcggttcccgtggcccccatccgcgaaatcatcgaatacccgggggtcaccgaaatcccgctggcaccggaattcctgcggggtgtgatcaacctgcgtggctcggtcgtgccgctgatcgacatcgccgcccgcttcggacggggcgccgccgagatcacctggcgtacctgcgtgatcatcttcgagacgacgcaggaagacagcctggggcaactcctgggcatcgtggtggacaccgtgcatgaagtgctcgatgtcccggccgagcagatcgagccccgccccgaattcggcaccctcatgcgcaccgaattcgtcgatggcatgatcaag…	MTAVESTSRRYLTFSLHKEIFAVPVAPIREIIEYPGVTEIPLAPEFLRGVINLRGSVVPLIDIAARFGRGAAEITWRTCVIIFETTQEDSLGQLLGIVVDTVHEVLDVPAEQIEPRPEFGTLMRTEFVDGMIKRNGKFIIVLDIDKVLNPQELKRLIEASEQRPEACPEGEAITEVQDA
NODE_106_length_90329_cov_7.03585_ID_305	fig|857335.5.peg.105	NODE_106_length_90329_cov_7.03585_ID_305_76925_77773	76925	77773	+	Chemotaxis protein methyltransferase CheR (EC 2.1.1.80)	FIG00000452	atgaatacgccctgtgatatcccggctcttcaactcagcgaacgcagctttgggttgttgcgttcgctgttcgagaaggaaaccgggatacacctgcgcggagaaaagcgtcatctggtgatcggccggttgcagcgacgcctggagcagcgcggcctgcacgatttcgagagctattgcgccctgcttcaacagccacacgaaacgcaggaacgacagcatttgatcgatgcgctgaccacgcacgaaacctacttcttccgcgaaccggcccatttccagcatcttcgcgagcaggcactgccaaacctggaaacgcgaccgctgcgaatctggagtgccgccagctcatccggcgaagaggcctacagcttggccatgaccttggccgacacactc…	MNTPCDIPALQLSERSFGLLRSLFEKETGIHLRGEKRHLVIGRLQRRLEQRGLHDFESYCALLQQPHETQERQHLIDALTTHETYFFREPAHFQHLREQALPNLETRPLRIWSAASSSGEEAYSLAMTLADTLGPDGWEVFASDVSACSVWQAIQGLYPQQRLDNMPKGYLKRFCRRGQGVYTGQMLIHADLRARVNFFRHNLLADDNKLGEFAVVFLRNALIYFDATRRGQIIGKVVRHLRPGGYLYLGQSESFSEPLTSLEYLGGSIYRRPSCPAIARST
NODE_106_length_90329_cov_7.03585_ID_305	fig|857335.5.peg.106	NODE_106_length_90329_cov_7.03585_ID_305_77770_78900	77770	78900	+	Chemotaxis response regulator protein-glutamate methylesterase CheB (EC 3.1.1.61)	FIG00017306	atgatccgtgtgatgatcatcgacgattccgccgtgatgcgttcggtcctgcaggacatcctgcagaagcaccggggcatcgaagtcatcggcacagcttccgaccccatcttcgcgcaacagcgcatggcacatgactggccggatgtgatcgtgctcgacgtggagatgccacgcatggacggcatcaccttccttcgcaagatcatggcagaacgccccacgccgacggtgatctgctcctcgctcacggaggccggcgcggaaaccacgctgcaggcactcgaagccggggcggtgagcatcatcaccaaacccaccaccaagctcacggagtttctgcgcgattatgaagatgacttcatcgccgccatccgggaagcttccgtggcccgcctg…	MIRVMIIDDSAVMRSVLQDILQKHRGIEVIGTASDPIFAQQRMAHDWPDVIVLDVEMPRMDGITFLRKIMAERPTPTVICSSLTEAGAETTLQALEAGAVSIITKPTTKLTEFLRDYEDDFIAAIREASVARLSNLRPHARTSSTGAISTRQEAPSSARTTSPVPERLSADAVLAPAAGRSAMTRTTDQIVAIGTSTGGTQALEFLFTHLPATTPGIVVVQHMPPMYTKSFANRLNQLSKVSIKEAETGDRILPGHALIAPGGKHMMIRRNGAQYDVEVVDGPLVSRHRPSVDVLFRSAAKAAGANALGIIMTGMGDDGARGLKEMFDVGAQTVAQDEASCVVFGMPKEAIRHGGVQETLALSDIPAHLLKHGGKA
NODE_106_length_90329_cov_7.03585_ID_305	fig|857335.5.peg.107	NODE_106_length_90329_cov_7.03585_ID_305_78909_80153	78909	80153	+	diguanylate cyclase/phosphodiesterase (GGDEF & EAL domains) with PAS/PAC sensor(s)	FIG00561534	atgatcaagtcactcaatccgcttcttaaactgcacggcgccctggtggtagacgacagcagcgtgcagcgtgctcatgcggtggaggtgctgcacaaggcaggcatcacccgcgttgtcgaagccgaggatggcaagagcgggctggaagccgtccgccgcctgatgccgcctcctgccctgctggtggtcgatctggagatgccacgcatggatggcatcgagatgctgcaggccctggccaccgaaaactatcgcccacctgtgctcgtggcgagcagcacgcatgcctctctggtggcgtccgtggaaaccatgtgtcaggagctgggcctgccaattcttggcgccttcgaaaagcccttcaccctggaagtcctgcagcgggcactgctccgc…	MIKSLNPLLKLHGALVVDDSSVQRAHAVEVLHKAGITRVVEAEDGKSGLEAVRRLMPPPALLVVDLEMPRMDGIEMLQALATENYRPPVLVASSTHASLVASVETMCQELGLPILGAFEKPFTLEVLQRALLRFENIFEARRAHRRIETQISLEELREALTRRQIQPHFQPKISLADGEVLSLEALARWQSAKHGFVPPAAFIPVAEDNGLISELTLQMQEAVLEQMQRWAAEGFTPSVAVNLSAHSLAERHFIDEIIRLTLQAQISPGKLIIEVTESALVGDMGAALGALGRLRLKGFGLSMDDYGTGFSTTQQLSRLPLTELKVDRSFVSGAPDKASLRTILSSVVRMGRELGLTTLAEGVEHESELRLLQTLGCDQAQGYLIAKPMPGYEIRPWLS…
NODE_106_length_90329_cov_7.03585_ID_305	fig|857335.5.peg.108	NODE_106_length_90329_cov_7.03585_ID_305_80395_80258	80395	80258	-	hypothetical protein		gtgccagccacagcagagaggaatccgatcatgtccaagcaagtcaaaaccgcgttgtcagccgcaggtgcttacctcggtatcgttgtcatgggcgccgttgccctcattccggcggtctatcaggcgatgatgtaa	MPATAERNPIMSKQVKTALSAAGAYLGIVVMGAVALIPAVYQAMM
NODE_106_length_90329_cov_7.03585_ID_305	fig|857335.5.peg.109	NODE_106_length_90329_cov_7.03585_ID_305_80661_81926	80661	81926	+	putative esterase	FIG00016132	atgcgtctgcttcgcctgctctgttccagcctcgtgtttgccgcttccgtctccgcttccaatgccagccagccccatagcggacagctggaagccggtcaggaaatcctcttgccactggccgtaaaaactggcgattacatcgaagcttcactggacacccctcaggcacgtgtgaatctcgatctgctggccagcgacggccacgccgtacgccgtctgctacaggcgagcatcggcagtggcgtcttccgcttcatcgcccagcctggtcagaccctacgccttggcggaaccgtcagtaccaccccctataccctacggatcacccgccaggtttccgtggctgaacagaaacttccgcccgaaccactcgctagcccggccctgcgcgaacta…	MRLLRLLCSSLVFAASVSASNASQPHSGQLEAGQEILLPLAVKTGDYIEASLDTPQARVNLDLLASDGHAVRRLLQASIGSGVFRFIAQPGQTLRLGGTVSTTPYTLRITRQVSVAEQKLPPEPLASPALRELAADLTKGGSTDAFWARMAHEGTPLIEAAGNGQYRVTFLWRGAKHGVRLFGGPARDHDELQRLGQSDVWFRSYTVPANARASYRLAPDVPVFAGNPRERRVAILATAQADPLNPRRWPGDAPDRFTQQSVLELPEAPLQAWITPTGAASGSLQSWLQESRILGNTHDIALYRPAGFDPGNPANLLLFVFDGPEYQSRVPTPTILDNLVAAGRLPPPLLSSSAMPAPRLAAWNCRTTPTLLVSWQRNYCHVWHAKPACSPGANARRWP…
NODE_106_length_90329_cov_7.03585_ID_305	fig|857335.5.peg.110	NODE_106_length_90329_cov_7.03585_ID_305_81923_82270	81923	82270	+	putative esterase	FIG00016132	gtgatcgcgctttcaggctctttctggtgggcgccactggaggccgatcagacccgtcattacatcggccagcgcgtactcacgctgcccaaggcgccattgcgtttcttcgtcagcgccggactctacgaaacagccaacggtacttccggcggcattctggaaagcagccgacatctgcgcgatctgctcgaagcccgtgcttatcccgtgcatttccgcgagtacaccggcggccacgattaccttgtctggcgcggtgcactggctgatggcctgctcgcattgtttgatctcaagccttcccaggtaacaggtcttctctcctcccccacctcttcccgctga	MIALSGSFWWAPLEADQTRHYIGQRVLTLPKAPLRFFVSAGLYETANGTSGGILESSRHLRDLLEARAYPVHFREYTGGHDYLVWRGALADGLLALFDLKPSQVTGLLSSPTSSR
NODE_106_length_90329_cov_7.03585_ID_305	fig|857335.5.peg.111	NODE_106_length_90329_cov_7.03585_ID_305_82312_83235	82312	83235	+	Iron compound ABC uptake transporter substrate-binding protein PiuA	FIG00137824	atggtcagccaggttgcgctggtactggccgcctccgtcgctctggccgcccctgctggcaagctgcgtatcgaacacgccagtggtgtcaccgaagtcaccgcaaacccgcgcaaggtcgtggtgctcgatctggccgcactggatctgctcgataccctgggtgccccggtaatcggcgtaccgaagtggaagatgccgccggaactggcgcgctatgaagcggccagtgtcaccaagatgggttccctgttcgaaccggattacgaaaccatcaacgtcgccgcacccgacctcatcgtgatcggcttgcgtctgcgggagaaatacgcaaaactcgcccagatcgcgccgacaatcgatctgactgccgatccgcaagatttttacggcagcctg…	MVSQVALVLAASVALAAPAGKLRIEHASGVTEVTANPRKVVVLDLAALDLLDTLGAPVIGVPKWKMPPELARYEAASVTKMGSLFEPDYETINVAAPDLIVIGLRLREKYAKLAQIAPTIDLTADPQDFYGSLARNARLVGQIFGKQAEVEKRLKQLQTSTTALRATGSKAGRALIVLTTGGKISAYGPGSGFGVLHEQFGLQAADPTLKPATHGQAVSYEYLLKANPDWLFVIDRDAAIGAAQGKSAQQLLDNPLVAQTTAWKKKQVVYLNPTHQYLTNGSLRAEQAIVDEVSAALAGKITTTAAR
NODE_106_length_90329_cov_7.03585_ID_305	fig|857335.5.peg.112	NODE_106_length_90329_cov_7.03585_ID_305_83241_84203	83241	84203	+	Iron compound ABC transporter, permease protein		atgaagctctgggtgctgctggtactgggcgtgctcgccacggcaacgctgagcttgttcatcggcgtggcggacttctcgctggcgccgctgggctggccggacgaagcccaggcacgactcaccctgctgtgggtgagccgtgtgccacgcagcctggccctggtctttgccggcgcggccaccgccgtggcaggcctgatcatgcagatgctgctgcgtaaccgctatatcgagccagccatggtcggcacggtggagggcgcctgccttggcatgctgttggcactgatcgtggcgcctggcattccggtattcggccgcatgctgatggcctttgtcggcgcgattgcggtcaccgggctgtttcttgcgatcctctcgcgcctgccgctgcgc…	MKLWVLLVLGVLATATLSLFIGVADFSLAPLGWPDEAQARLTLLWVSRVPRSLALVFAGAATAVAGLIMQMLLRNRYIEPAMVGTVEGACLGMLLALIVAPGIPVFGRMLMAFVGAIAVTGLFLAILSRLPLRSVLIVPLTGIILAGIVDAATNFIAFNFELQQSLAAWRLGDFAQVLSGRWELLWLAFALTLVAAFVADRFTIAGLGRDTATSLGLNHRRVMALGLVIVSAVSASVVVTVGVIPFLGLVVPNLVSLVSGDNLRRAVPLTALAGALFALVCDVLGRLLNWPFEVPIGVIIGIVGSATFLWILARERRRLG
NODE_106_length_90329_cov_7.03585_ID_305	fig|857335.5.peg.113	NODE_106_length_90329_cov_7.03585_ID_305_84207_85160	84207	85160	+	Iron compound ABC uptake transporter permease protein PiuC	FIG00132912	atgagcctttcgcatcgccgcactttgcttgcgctcggcctgggttgcctggtcgtgatcacgctatccatgacgctgggcgcacgtggcagctggagtttcgtgctgcccttccgcgccaccaaacttttcgtgatctgcctcgtggcgcacgccgtgggcgtttccacggtgctgttccagacactttccggcaaccgcatcctcacacccgcggtgatgggtttcgatgcactgttcctgatgctgcagacggcactgttcctgctgcttggctcattccaggtaacctcgttgccgggctgggccattttcgtactgcaggtggccgccatgggcagcttcgccgcgctgctctaccggcgtctcttcaccggcagcgcgcagagcctgcacatg…	MSLSHRRTLLALGLGCLVVITLSMTLGARGSWSFVLPFRATKLFVICLVAHAVGVSTVLFQTLSGNRILTPAVMGFDALFLMLQTALFLLLGSFQVTSLPGWAIFVLQVAAMGSFAALLYRRLFTGSAQSLHMMILVGIVLGTLFRSLANYLQSLIDPNEFLVLQGRLFANFNNADPSALGISALVISASTTAVILRLPRFDVIGLGRERAINLGLDYRREMTFGLALIGVLVSVSAALVGPVTFFGLLVAHLAYRLLPTHRHAVVLPAVSMIAIMALLIGQFVLERVFSFGAALSMVIEFGGGILFLFLLLRGAAR
NODE_106_length_90329_cov_7.03585_ID_305	fig|857335.5.peg.114	NODE_106_length_90329_cov_7.03585_ID_305_85157_85933	85157	85933	+	Iron compound ABC transporter, ATP-binding protein		atgatagaaacccatgccctgacgaaacgctacggccagaccacggtggtggacgccgtttcgctggattttccgcctggcggcctgagcgccatcatcggcccgaatggtgccggcaagtccaccttgctgtgcatgctcgcgcgtctgctcgacgcggatggtggtgaggtccgcctggatgggcgagcgctggccgactggcccaatgccgacctggcatgccggctggccatcctgcgccaagacaatcaccttgccatgcgcctgagcgtgcgtgatctggtgagcttcgggcgatacccgcacagcaaggggcgcatcacaccagcggaccgtgagcagatcgctgccgcgctggcctacatggatctggaagccatcgccgaccgcttcctt…	MIETHALTKRYGQTTVVDAVSLDFPPGGLSAIIGPNGAGKSTLLCMLARLLDADGGEVRLDGRALADWPNADLACRLAILRQDNHLAMRLSVRDLVSFGRYPHSKGRITPADREQIAAALAYMDLEAIADRFLDELSGGQRQRAFIAMVLAQDTDYILLDEPLNNLDLRHAHDMMRQLRQLADERGKTVLVVLHDINFAAAWSDRIIAMKNGRLLHAGPPAEIMRPEVLEEIYDLSMPVHQLGAHPAGLYWLPAAARE
NODE_106_length_90329_cov_7.03585_ID_305	fig|857335.5.peg.115	NODE_106_length_90329_cov_7.03585_ID_305_87001_85949	87001	85949	-	Chemotaxis response regulator protein-glutamate methylesterase CheB (EC 3.1.1.61)	FIG00017306	atgatcaaggtcctgatagtcgatgactccgcattgatccggcagttgctcacacacatcctgagccaggatccgctgatccgggtggtaggcacggccagcgacccctacgtggcccgggacaagatcaaggagttggagccggatgtattgacgctggatatcgagatgccacgcatggacggactggagttcctcgaccgcctgatgcgtctgcgtccgatgccggtgatcatgatctccacacttaccgaggccggtgcggatgtgacactgcgggcgctggaactgggggctgtggattacgtcaccaaaccggttggcatggtggtggaaacgctcgagcgctacgccgaggagatcatcgccaaggtgaagatggcggcgcaatgccgtctg…	MIKVLIVDDSALIRQLLTHILSQDPLIRVVGTASDPYVARDKIKELEPDVLTLDIEMPRMDGLEFLDRLMRLRPMPVIMISTLTEAGADVTLRALELGAVDYVTKPVGMVVETLERYAEEIIAKVKMAAQCRLRAGGGGRAVQRSVPKPASLEIRGAADRLILLGASTGGTEAIKEVLKPLPPAMPPIIIVQHMPPGFTASFARRLDSLCRLHVKEGEHGERPLPGHAYIAPGGRHMVLTKAGGQYMLSLNDDETMNLHRPAVDKLFMSALPYVGSNAIGVLLTGMGKDGARGLLALRQAGVHTVVQDEESCVVWGMPREAAQIGAADAILPLSGIADHLLSRLHARASA
NODE_106_length_90329_cov_7.03585_ID_305	fig|857335.5.peg.116	NODE_106_length_90329_cov_7.03585_ID_305_90218_87051	90218	87051	-	Methyl-accepting chemotaxis protein I (serine chemoreceptor protein)	FIG00005728	ttgctgccggcattgcagaaccatcgtgggcgcagcgctgaagtcaagggcggcgatgctgaggcagccaagagtctggaggcgatcgctgctgatctcgaagtcaggctgcgctccgtggaggggcagactgcggcattgcgcggtttttcggtggacagcaaatggcaatccttgaagcgggatgtggaagccttgctggcggacgatgccaagctcagtgtcgatcagtctttcgagcgccattccgtgctgatcaacagggttggcagtctgatgagcgatgtggccagcgattccgggctggtactggatccggataccgggacctaccatctggtcatagccggtgttctcaacgctcccgagctggccaatcacatggcctacacccggcga…	MLPALQNHRGRSAEVKGGDAEAAKSLEAIAADLEVRLRSVEGQTAALRGFSVDSKWQSLKRDVEALLADDAKLSVDQSFERHSVLINRVGSLMSDVASDSGLVLDPDTGTYHLVIAGVLNAPELANHMAYTRRLGALMLQRNTFDQNTKLDLAFNVAKAEQHMEMIGTEFSAAVRYAPEIAAQLEPAVRSLEAGVQSAGSLVKQRILLAPKADYDNKLFYKEVSTSVDSAYGFYYNLAEVIEKLLRERVGMLSAQAYALLAITLLIFIFGIAMAALFVRDTLRSVRLAVARFRDIASGNFRGEIRTSTKDEIGQLLNGLKLMQIKLGFDINESRERAERALRIKIGLDSVNTNVMIADNERTIIYLNPSVIEMLRVAQSDIRKDLPHFDVDRLLGTKID…
NODE_10957_length_9026_cov_16.1925_ID_22761	fig|857335.5.rna.1	NODE_10957_length_9026_cov_16.1925_ID_22761_225_297	225	297	+	tRNA-Ala-GGC		gggggtatagctcagctgggagagcgcttgcatggcatgcaagaggtcagcggttcgatcccgcttacctcca
NODE_10957_length_9026_cov_16.1925_ID_22761	fig|857335.5.rna.2	NODE_10957_length_9026_cov_16.1925_ID_22761_322_394	322	394	+	tRNA-Glu-TTC		gtccccatcgtctagaggcctaggacaccgccctttcacggcgataaccggggttcgaatccccgtggggacg
NODE_10957_length_9026_cov_16.1925_ID_22761	fig|857335.5.rna.3	NODE_10957_length_9026_cov_16.1925_ID_22761_444_517	444	517	+	tRNA-Asp-GTC		ggagtggtagttcagttggttagaataccggtctgtcacgccgggggtcgcgggttcgagtcccgtccactccg
NODE_10957_length_9026_cov_16.1925_ID_22761	fig|857335.5.rna.4	NODE_10957_length_9026_cov_16.1925_ID_22761_578_650	578	650	+	tRNA-Glu-TTC		gtccccatcgtctagaggcctaggacaccgccttttcacggcgataaccggggttcgaatccccgtggggacg
NODE_10957_length_9026_cov_16.1925_ID_22761	fig|857335.5.rna.5	NODE_10957_length_9026_cov_16.1925_ID_22761_700_773	700	773	+	tRNA-Asp-GTC		ggagtggtagttcagttggttagaataccggcctgtcacgccgggggtcgcgggttcgagtcccgtccactccg
NODE_10957_length_9026_cov_16.1925_ID_22761	fig|857335.5.peg.117	NODE_10957_length_9026_cov_16.1925_ID_22761_927_2630	927	2630	+	MSHA biogenesis protein MshE	FIG00003161	atggccaaaccgcagaagtaccgcctaggggaacttttagtccaggaaggtctcgtcactccggcacagctggaagaggccctggttcagcaaaagcagagtggtcgtaagctcgggcgtgtgctggtcgagagcggtatcgttactgaagcccggatctgtaccgccatcgccaatcaattgggtatcgcctatatcgatctgcgcgagcgggaagtcgatcctgccgttgccagcctgctgcctgaaaccgtggcgcgtcgtttccgggttctggtgctggaagcctctggcaacaagtatctgctgggcatggccgacccctcggatatcttcgcctacgacgagatcgctcgcatcctcaagaaggatctgaatctcgccgtgttgtcggagaac…	MAKPQKYRLGELLVQEGLVTPAQLEEALVQQKQSGRKLGRVLVESGIVTEARICTAIANQLGIAYIDLREREVDPAVASLLPETVARRFRVLVLEASGNKYLLGMADPSDIFAYDEIARILKKDLNLAVLSENQLLASIDRLYRRTEEITGLARELQQDLGNAYVDFGGLGLDASGEDAPVVKLLQSIFEDAFQIKASDIHIEPQELKLQIRFRIDGEMHLQTEVDSRIGPALVLRLKLMSGLDISEKRLPQDGRFNVKVKQASVDIRLSTMPTQYGESVVMRLLAQNGGLLDLERIGMPPEMLARYRRMIAHSYGMLLVTGPTGSGKTTTLYATLSALNAPTTKIITIEDPVEYRLVGLSQVQVNDKIELSFARVLRSTLRHDPDVVLVGEMIDEETA…
NODE_10957_length_9026_cov_16.1925_ID_22761	fig|857335.5.peg.118	NODE_10957_length_9026_cov_16.1925_ID_22761_2639_3859	2639	3859	+	MSHA biogenesis protein MshG	FIG00229422	atgccaggttttgcgtacaaaggacgtgacgcacagggcgcggtgagtcaggggacgatagacgcgccggacgcccccagtgcggccgaccttctggtcagccgcggcatcctgccagtcgatatccaacccgccgcggtccggcaatccttgttgaacctgttcgacgtacggcgacgagcaatcagcgctgaagatatcatgttcttcagccgccagatgcataccctcatgaaggctggcgtccccatcctgcaggcattggccggtttgcgcgactccgcgactcatcctgcctttgctgaaatgctcggacgcctgcgtgacagcctcgacagtggacgcgaactgtccatcgcgttgcgcgaggttgaagttttcggccccttctatgtgagc…	MPGFAYKGRDAQGAVSQGTIDAPDAPSAADLLVSRGILPVDIQPAAVRQSLLNLFDVRRRAISAEDIMFFSRQMHTLMKAGVPILQALAGLRDSATHPAFAEMLGRLRDSLDSGRELSIALREVEVFGPFYVSMVRVGEMTGRLDKIFLTLFDHLNFEKEMRAKIKAALRYPTFVVIALAAALVVINWMVIPAFSKVFATFNAQLPLMTRILIGFSDFCVNYWYLMLGGLLLCVFSARAWVRTSAGQLAWDRWKLSLPLVGETIRKATLARFARSFSLSLASGLPVMQAFSVVAKVVDNAYIAGKLEDMRRGVERGESILRTAASARIFTPIVLQMIAVGEESDSLDDLLLEIAEMYEREVDYEVDNLSARIEPVLVVVLGAIVLVMALGIFLPIWDLS…
NODE_10957_length_9026_cov_16.1925_ID_22761	fig|857335.5.peg.119	NODE_10957_length_9026_cov_16.1925_ID_22761_3861_4313	3861	4313	+	hypothetical protein		atgagtgtgcgcaagggccgtttcggcttgcctggttgggagattggcctttgcctgctgttgatggcgctgactggaggcgtgctctggtcacgcgcggaaaccgtactggagcgtgctgaaagtgttgcggttgccaccaccctgatgcacatccgcagtggcctgcgactggagcagatcaggcgtcttgtcgcgggccaggatgcgcatgggcttgtgggcagcaatcccctggttttgcttgaggcggtgccagagtttcaacaggtgccggtatccggaagatggcattttgatgccctctccggcgagcttcggtatcgaccccgtcgtcaggcccacctgcatgttcagactgctgacggggctgtactgctggcctggcggattctgtcg…	MSVRKGRFGLPGWEIGLCLLLMALTGGVLWSRAETVLERAESVAVATTLMHIRSGLRLEQIRRLVAGQDAHGLVGSNPLVLLEAVPEFQQVPVSGRWHFDALSGELRYRPRRQAHLHVQTADGAVLLAWRILSSPQGGVEMVVTTPYQWF
NODE_10957_length_9026_cov_16.1925_ID_22761	fig|857335.5.peg.120	NODE_10957_length_9026_cov_16.1925_ID_22761_4841_5311	4841	5311	+	MSHA pilin protein MshB		atgtcccgccggcatgcgggtacggctgattaccgatattctggcttcacgctgcccgaactggtcacaaccctggttcttctgggcttgctggctgctgtcgccatgccccgcttcatggggcgtggcgaatttgatgccttcggggccgccgagcagacccgggcggcgttgcgtttcgcacagaagtccgcagtcgccaagcgtcgccaggtctgcgtgacgattgccaacaatcagctgaccttgcgtgtcgcggcgcaattcggcgcagcctgcagcctagcgattcagcatccgcagagcagtgaagactactcgctgcaggttccggcaggcgtgaccatcacgcctgctgacttcagcttcgatccattggggcgcgcttcggcagcacaa…	MSRRHAGTADYRYSGFTLPELVTTLVLLGLLAAVAMPRFMGRGEFDAFGAAEQTRAALRFAQKSAVAKRRQVCVTIANNQLTLRVAAQFGAACSLAIQHPQSSEDYSLQVPAGVTITPADFSFDPLGRASAAQSLNVAGGSSSLPILVEAETGYVH
NODE_10957_length_9026_cov_16.1925_ID_22761	fig|857335.5.peg.121	NODE_10957_length_9026_cov_16.1925_ID_22761_5301_5855	5301	5855	+	MSHA pilin protein MshD		atgtgcattgagcgatcctgtcagcaaggtctgaccttcgttgaactggtcgtgttcatcgtgatcgttgctgtcagcctggcgggtatcttgaacgtgctggatttcagcgtccgccatggtgcggatcccatgctcttcaaacaacaggtatcgattgccgaatcactgctcgaagaggtcgccagcaagcccttcacctggtgcgatccggatgatccggtcgtgacgagtgcgggtggtacggctgcctgcggcgtcgcgcaggggcttgcaccaacagcaggcgaaagccgtaacagcggtaccagtccgttcgacaacgtaggcgactacagcggtttcagcatgacgggcatccaggcgccggacggtacggcgatcgacggactggcagcc…	MCIERSCQQGLTFVELVVFIVIVAVSLAGILNVLDFSVRHGADPMLFKQQVSIAESLLEEVASKPFTWCDPDDPVVTSAGGTAACGVAQGLAPTAGESRNSGTSPFDNVGDYSGFSMTGIQAPDGTAIDGLAAYTATVAIAQAGAAFGLADASAALRIDVTVTTPGQAAITLTGYRMRYAQNAP
NODE_10957_length_9026_cov_16.1925_ID_22761	fig|857335.5.peg.122	NODE_10957_length_9026_cov_16.1925_ID_22761_5845_6639	5845	6639	+	MSHA biogenesis protein MshO	FIG00003330	atgcaccgtgatttttccgcgcggggcttcaccctgatagagatggtggtggtggtgaccatcaccgcgttgttggtgcctatcgttgccgtcttcattccccgtcccatgcaagggctggtcgataccgccggacgtgtcgcgcttgcggatgctgctgatactgccgtacgccggttgcagcgcgatatccagcgggccttgccgaacagcctgcgtgcgcagcagagcagtggcgtatggttcatcgagtatttgccggtggaagctgccgggcgttattgcacggcgaccgactgcggcgcattccctctggatacagtcaacgctcaaacgcagttgagctatgcggggcaagccttgccgacattgccagcgaacagtgcggtcgtgatctac…	MHRDFSARGFTLIEMVVVVTITALLVPIVAVFIPRPMQGLVDTAGRVALADAADTAVRRLQRDIQRALPNSLRAQQSSGVWFIEYLPVEAAGRYCTATDCGAFPLDTVNAQTQLSYAGQALPTLPANSAVVIYNLGVAGSDAWAGDNLATLASASTGQVSFSTAKRFPFASPGNRFHVVSGPVSYACGNGTLTRIWGYARQATQPVAVPAGASTALLATQVSACNVSLANNSIDQNGLLVIRLTLSRGQENVSLSHAVRILNVP
NODE_10957_length_9026_cov_16.1925_ID_22761	fig|857335.5.peg.123	NODE_10957_length_9026_cov_16.1925_ID_22761_6646_6768	6646	6768	+	hypothetical protein		atgccggtctgtcaagcctatgtcgtcattgcggcgaacgccacaatccagtgttttcaggcttcgatggatcccggctttctccgggatgacgccgacaaggaatgccctacgctcaagtga	MPVCQAYVVIAANATIQCFQASMDPGFLRDDADKECPTLK
NODE_10957_length_9026_cov_16.1925_ID_22761	fig|857335.5.peg.124	NODE_10957_length_9026_cov_16.1925_ID_22761_6794_7195	6794	7195	+	MSHA biogenesis protein MshP		gtgctgcctgccgccatctttctgctggtggtgatggccgccctgggggctttctttgttcaggttggcgctgccagccagcaggcggcggccctggacatgcagggcgcgagggcattgcaggcagcgcgtgcaggcatcgagcgcggcttgtatgcggtacagatcgaaagcgcctgcggtggcggcacattggcaaacatccccgggttgaatggtttcagggtcacctgggcctgcaatgccgttgccttcactgacggtggcaccaacagaacgatctggcagatcacttccacggcttgctatacaggcgataccgggtgcccgagcagtttgacggatgaaattcggcgcagtgattacgttgagcgccaactgattgtggtgacggagcga…	MLPAAIFLLVVMAALGAFFVQVGAASQQAAALDMQGARALQAARAGIERGLYAVQIESACGGGTLANIPGLNGFRVTWACNAVAFTDGGTNRTIWQITSTACYTGDTGCPSSLTDEIRRSDYVERQLIVVTER
NODE_10957_length_9026_cov_16.1925_ID_22761	fig|857335.5.peg.125	NODE_10957_length_9026_cov_16.1925_ID_22761_7297_8946	7297	8946	+	MSHA biogenesis protein MshQ	FIG00053486	gtgcagggtttgctggggctttttgcttcatgcggctttaccttgaatgcgccttccggtgcgacagaaggggatgttctgatcgcacagatcatcgccaaggccagtgagaccatcaccgcgccgagtggctggacccggatcagccctgccagcggggttggaaccagcctgcgacaacatatctattatcgctacatcgccacaggccaaaccgcaggcagtgccacctggcagatcgatgggccgtggctcgggctattgaattcaggctatgcaaccggtgtcatgtacgccgcacgaggcgccgagaatccggattgtgcaagtgccacgaccttccgttgtggcggtaccgttaccggaggggtaggaaccagcgttgtggcgcccagtatg…	MQGLLGLFASCGFTLNAPSGATEGDVLIAQIIAKASETITAPSGWTRISPASGVGTSLRQHIYYRYIATGQTAGSATWQIDGPWLGLLNSGYATGVMYAARGAENPDCASATTFRCGGTVTGGVGTSVVAPSMSLQYPAGSLRMAFFASNSGTASITPALENSATAGVYNRAGGSVTGVGLHGSYYLLGSDSNGGQQSANLNTSSYNIGSTFILRAAPVLTCVSDNFNRSTGLGNDWSSVRVAGDFTPQIVNNRLRLTAAVTNQSTGVSFQRVFPSAGNYLQLVFRFYGYGGGGADGVALILSDASVTPQPGGFGGSLGYAPKSNPTVAGFAGGWLGIGLDEYGNFSSSSDSGPCAPGVTCSSNGIGQSLGIRGASPNYYWLRGTGTLSPTVSNSSGHL…
NODE_11148_length_8802_cov_16.1354_ID_23131	fig|857335.5.peg.126	NODE_11148_length_8802_cov_16.1354_ID_23131_171_488	171	488	+	DNA topology modulation protein		gtgctgtggcatcgtgccacgcatatcgtctggctcaacttcggccgcgccacggtgttttcccgcctgctctggcgcaccctcagccgttttctgatgcgcacggagctatttaacggcaatcgagaatccctgcgcatggctttcctgtccagggagtccgtactcctttggtcgctcaccaccttcacccggaatcggatcaggtattccgcccttcgcaaggatccgaagtttgcgcatctgcagtggacggagatcaccagaccgtcgcaaaccggcgccgtcatcagcgctttcgaaagtcgcgacgtctga	MLWHRATHIVWLNFGRATVFSRLLWRTLSRFLMRTELFNGNRESLRMAFLSRESVLLWSLTTFTRNRIRYSALRKDPKFAHLQWTEITRPSQTGAVISAFESRDV
NODE_11148_length_8802_cov_16.1354_ID_23131	fig|857335.5.peg.127	NODE_11148_length_8802_cov_16.1354_ID_23131_1244_558	1244	558	-	KfrA		atgtcagctcaagaagtcacgtatgaggaagttgccgccgcagccgttcgcatggtggagggtggtcagcccgtcacggtgggggcgttgcacgatgcgttgggcgtagcttccctgcaggccctgcatcggcacctcgcggcctggcgtgccagccagaccccggcggctgaagccagcatggcgattcctgaggcagtgactaccgccctcatgagctgggcgcagcaactggcggaatccgccagatcgggtttgcgtagcggcctggagcaggccgatggcgatctggcctcgttgctggcactgaacgagcaactggagggcgggcagagcgagctgcgcgcgcaactcgaacaactgacgcaagtacgtgatcaggcgctggcgaaactggcc…	MSAQEVTYEEVAAAAVRMVEGGQPVTVGALHDALGVASLQALHRHLAAWRASQTPAAEASMAIPEAVTTALMSWAQQLAESARSGLRSGLEQADGDLASLLALNEQLEGGQSELRAQLEQLTQVRDQALAKLAERDEQINRLTVELRHARDVATEALVGKAKDQLAIDGKDAQITELRRQLEQNLAASAAQSDARLAIEMELVGATTARDNLASEVKALRAELDAQRI
NODE_11148_length_8802_cov_16.1354_ID_23131	fig|857335.5.peg.128	NODE_11148_length_8802_cov_16.1354_ID_23131_1541_1341	1541	1341	-	hypothetical protein		ttgcgcctgtgtcgctcattcgtcctcttcgagcaactgctccagccgtctctggtgatggttcaggaagtctcgggtgatcgcgtaatgttcggtctcttcgtaggcgacctcgtggatgcccgagtcgtcgaactgatagatccgggcgcccggataagccagcaggatgggcgagtgagtggcgatgatgaattgtga	MRLCRSFVLFEQLLQPSLVMVQEVSGDRVMFGLFVGDLVDARVVELIDPGARISQQDGRVSGDDEL
NODE_11148_length_8802_cov_16.1354_ID_23131	fig|857335.5.peg.129	NODE_11148_length_8802_cov_16.1354_ID_23131_1706_3385	1706	3385	+	ABC transporter ATP-binding protein	FIG00450796	atgatttccgtcaagaatgtcacgctgcgtcgcggcgtcaaggtcgtgctcgaccaggcctcagtcacgtttgctcccggtgagaaaatcggcctggtaggccgcaacggcgcaggcaaatcctccttcttcggcctgctcaacggcacgctgcacgaagacagcggcgagttctccattcccacgcaatggcgcatggcccaggtggcgcaggacatgcccgaaaccagccagagcgcgaccgatttcgtgatcgagggggacgtcgccttgctggccgcccagcaggaagtcaccgctgccgaggcgagcgatgacggcatgcgcatggcgcacgcctacatggcgctgcacgatgccggcgcccacgatgcgcccgcccgtgcccaggcactgatc…	MISVKNVTLRRGVKVVLDQASVTFAPGEKIGLVGRNGAGKSSFFGLLNGTLHEDSGEFSIPTQWRMAQVAQDMPETSQSATDFVIEGDVALLAAQQEVTAAEASDDGMRMAHAYMALHDAGAHDAPARAQALIQGLGFTAAQLDQPVNSFSGGWRMRLLLSRALMCPSDLLLLDEPTNHLDLDALVWLEAWLKRYQGTMVVISHDREFLDAVTQVTVHVDNAKLVRYGGNYSKFEEMRAEQMALQTAAMAKQADKIAHLQKFIDRFKAKASKAKQAQSRVKALERMEKVAPVLADAEFSFEFREPQNLPNPMLSMLDASFGYPPPEDAAEGTPPITIVQHINRSVLAGQRIGILGANGQGKSTLVKTVAHALVPTHGEISEGKGLNIGYFAQQELDVLR…
NODE_11148_length_8802_cov_16.1354_ID_23131	fig|857335.5.peg.130	NODE_11148_length_8802_cov_16.1354_ID_23131_4414_3494	4414	3494	-	Gluconolactonase (EC 3.1.1.17)	FIG00127296	atgacgagtgtcctggaagtcaggcatgaggcgctgctgggcatcccgctgcgcaatgcctgcggcgaagggcctgtctggcatgcggagcagggctgctggtactggatcgatctgcctgcgcgcagcatccacaggctcgatcctgccagcggcgtgctgcggcagtggtctgtcgacgagcatctgggctgcatggtgctgcgtgccgatggcgggctcacctgcagttgcgtttccggcatcttcgatgtggatctgccggaggaggggggccaggcgctgcagcggcggctcgccagcgtgacgcatgcacagcccggcatgcgtttcaacgatggccgctgcgatcgccagggccggctgtgggtttccagcatggtgatggatatctcgctc…	MTSVLEVRHEALLGIPLRNACGEGPVWHAEQGCWYWIDLPARSIHRLDPASGVLRQWSVDEHLGCMVLRADGGLTCSCVSGIFDVDLPEEGGQALQRRLASVTHAQPGMRFNDGRCDRQGRLWVSSMVMDISLASPAGNWYCYKRADGLQCMEGGYVIPNGSAFSPDGKTFYSSDTHRNVRMVWAWDYDIAEGRAHSRRVFVDMRDMRDMVRRPDGAAVDTEGCYWICCLDEGCIKRFTPGGVLDQVWKTPMLKPTMCAFGGEDMRTLMVTSLSRGPEDLAGDPEGGRLLMFRPGAQGIAEPRLAG
NODE_11148_length_8802_cov_16.1354_ID_23131	fig|857335.5.peg.131	NODE_11148_length_8802_cov_16.1354_ID_23131_5931_4411	5931	4411	-	Tricarboxylate transport membrane protein TctA	FIG00010454	atgaacgaactcagcctgcttctcacgggtttccagaatctgttctctcatcccacggccttgctgctggcggcacttggcgtcgcactcggcatcgtcatcggtgccttgccggggctgacggccaccatgggggttgccatcctgctgccctttacctttggcatggatccggtttccggcctgttgatgatctccggggtttttttcggcgggatctacggcggctccgtcaccgccatcctgttgaaaatttcgggcacgcccgctgccgctgcgacggctatggacggctacgagctgacgaagaagggcatggccggcattgcgctgggtactgccactttctcttccttcatcggtggcacgctcagcgtgatcgtgctgatcttcatggcg…	MNELSLLLTGFQNLFSHPTALLLAALGVALGIVIGALPGLTATMGVAILLPFTFGMDPVSGLLMISGVFFGGIYGGSVTAILLKISGTPAAAATAMDGYELTKKGMAGIALGTATFSSFIGGTLSVIVLIFMAPLLAGIALEFSASETFALAVFGLSIIASISGTSVVKGLIAGFLGLLIATVGMDPMGGFPRYTAGFTELFNVPFIPVMIGLFATAEAFKAMEDRNVRKAVAAALGRIIPPWSTYKRMLATVLRSTGLGVLIGSIPGAGADIAAFVAYNETKRFSKTPENFGKGELSAVAACESGANGCTGGALLPMLTLGIPGDAVTAVMLGALTLQGLQPGPLLFREHADMVFTLFAGMLICYVFMLVMGLGSLRFMGRILQLPKAVLTPVILALC…
NODE_11148_length_8802_cov_16.1354_ID_23131	fig|857335.5.peg.132	NODE_11148_length_8802_cov_16.1354_ID_23131_6447_5944	6447	5944	-	Tripartite tricarboxylate transporter TctB family		atgacccaagctccttcttcggccggcagtgccgtgccgcgcatggccgatcttgtcgtcggctgcatcctgatcatggtggcggtgctggcgatcgtgaccgcacaaggttttccatccaccaatctggtgaccgatgtggggcccgcccgctttcctgtcatctatgcctgcgcactgatcttgctgagcttgatcatgatgacgggcgctctgcggcggcctgctccgcctgcgggcaagcctgtggatcgcctgggttacgtctgcgtggtgatcggcgtgatcgccacggcactgtgcatccttgtcatggagtggatcggctacggcctcagctccgtgatctacctgactggactgatgtggatgatggggtggcgccatcgtcttttcacg…	MTQAPSSAGSAVPRMADLVVGCILIMVAVLAIVTAQGFPSTNLVTDVGPARFPVIYACALILLSLIMMTGALRRPAPPAGKPVDRLGYVCVVIGVIATALCILVMEWIGYGLSSVIYLTGLMWMMGWRHRLFTPLVAIFITGLLYALFSFSLNVPLPVGGLFEQLLS
NODE_11148_length_8802_cov_16.1354_ID_23131	fig|857335.5.peg.133	NODE_11148_length_8802_cov_16.1354_ID_23131_7516_6551	7516	6551	-	Tricarboxylate transport protein TctC	FIG00050854	atgaagactcgtcgtaccttttccaagctgatgctgggcctttcggccgtgcttctcgcaggcggcgtagcccaggccgccgactatcccaccaaacaaatcgagctgatcgttccttacgccgcgggtggcggcaccgatctggttgctcgtgcctatgccgacgcggccaagaaatatctgccgcaggcaatcggcgtggtcaacaagaccggcggcgccggtgccgtgaggctcaccgagatcatggcgtcccgccccgatggctacaagatcggcatgggcacggtggaaatcgccatgctgccgcacatgggcgtggcccgcttcaccgtggacgattacatcccgattgcccgcctgaatgccgaacccacggccattaccgtgaatgccgaa…	MKTRRTFSKLMLGLSAVLLAGGVAQAADYPTKQIELIVPYAAGGGTDLVARAYADAAKKYLPQAIGVVNKTGGAGAVRLTEIMASRPDGYKIGMGTVEIAMLPHMGVARFTVDDYIPIARLNAEPTAITVNAEAPWKTIDEFLAYAKANPGKVRIGNSGTGAIWHIAAEAIEEKTGLTFNHIPYDGANPAVTALLGKHIEAVSVSPAEVIAHVAAGKLRILAVGADERAKAFPDVPTLKEKGVDVSIYTWRGIVVPKKTPQAVVNVLREASKKTAEDPAFRETLSKMNLTWAYADSAVFKAAMDKDNLFFKDMMTKIGLAR
NODE_11148_length_8802_cov_16.1354_ID_23131	fig|857335.5.peg.134	NODE_11148_length_8802_cov_16.1354_ID_23131_8241_7603	8241	7603	-	2-dehydro-3-deoxyphosphogalactonate aldolase (EC 4.1.2.21)	FIG00065872	atgaatgaggcacgtctggcccgtttcgaggccgccatgcagagtctgcccctggtcgccattctgcgcggcttgccgccggaagatgccgaggccgccgcgcagaccttgcttgaggccggtttccggctgatcgaggtgcccttgaactctccggaccccttcaccagcattgccaccatgcgccaggtgctgccgcccgaagtgctggtgggcgccagcacggtgatgagcgcggcccaggtgcgacagctggccgacatcggcgccgacctgatggtgacaccgcataccgatcccgtgctgatcgccgccgccaaggctgccggtctggtgagcctgcccggtttcttcacgcccagcgaggctttcgccgcactcgcggccggcgccacggca…	MNEARLARFEAAMQSLPLVAILRGLPPEDAEAAAQTLLEAGFRLIEVPLNSPDPFTSIATMRQVLPPEVLVGASTVMSAAQVRQLADIGADLMVTPHTDPVLIAAAKAAGLVSLPGFFTPSEAFAALAAGATALKLFPAEQAGPATVKALRAVLPASARVLPVGGVSPETLATWRAAGVAGFGLGSALYGKGTTVAELGERARRFVAAWRAS
NODE_11148_length_8802_cov_16.1354_ID_23131	fig|857335.5.peg.135	NODE_11148_length_8802_cov_16.1354_ID_23131_8696_8238	8696	8238	-	2-dehydro-3-deoxygalactonokinase (EC 2.7.1.58)	FIG00001659	atgaccggcgagctgttcgcggtgctggcgcagcacagcattctcggccgtctcttctccaccggggtcgcaacgtcggagcaggcgcaggaagccttcgtggccggcatcaatgttgctcgcgacggcggccctggcgcactcagtcaccagttgtttgccgtgcgtacgctgggcctcaccgggcgttacccggggtccgcgctgaaggattacctctccggcctgctgatcggcaacgagctggtatccggcctggcccggctgcacggcgcagggcaggagcaggccctgatcctgattggcgatggtgcgctgtgccagcgctacgaagaggcgctggccgtgcttggcgcattccctgcagctgtgctgggcaataccgcgccagccgggttg…	MTGELFAVLAQHSILGRLFSTGVATSEQAQEAFVAGINVARDGGPGALSHQLFAVRTLGLTGRYPGSALKDYLSGLLIGNELVSGLARLHGAGQEQALILIGDGALCQRYEEALAVLGAFPAAVLGNTAPAGLFDFARAAGLLYTRLEESAS
NODE_11221_length_8695_cov_16.1032_ID_23287	fig|857335.5.peg.136	NODE_11221_length_8695_cov_16.1032_ID_23287_2204_915	2204	915	-	Putative protease	FIG00949142	atgtccctccgccgccctgaactcctcgctccggccggcacgctggccatgctcgacaccgcgctggccttcggcgccgacgcgatctatgctggccagccgcgctacagcctgcgcgtgcgcaacaatgatttcggcaatccggaagtgctgaagaccggcatcgaccgtgtgcatgcggcaggcggccagttctatctcgtctccaacatctatccgcacggcgccaagctcaggacctatctgcgcgacatggcgccagcgatcgccctcaagccggacgcgctgatcatgtccgaccccggcctgatgatgatggtgcgcgaggcatggcccgagcaggccatccatctctcggtgcatgccaatacggtgaatgcggcagcagtgaaattctgg…	MSLRRPELLAPAGTLAMLDTALAFGADAIYAGQPRYSLRVRNNDFGNPEVLKTGIDRVHAAGGQFYLVSNIYPHGAKLRTYLRDMAPAIALKPDALIMSDPGLMMMVREAWPEQAIHLSVHANTVNAAAVKFWARNGVSRVILSRELSLDEIEEIRQACPETELEVFVHGALCIAYSGRCLLSGYFNHRDPNQGSCTNSCRWDFNVQQGKTDASGDVYLIEERERRAGSYNVIEEDEHGTYILNSKDLRAIEHVQRLVAIGVDSLKIEGRTKSPYYVARAAQAYRAAIDAALAGTPLDPALVDSLDGLANRGYTDGFFDRHQEAARRGGDAEFQNYARGSSESARSLYVGDVLRYDAARGLAEVAVKNRFAVGDRLELVQPQGNLTYEITAMQNAEGAA…
NODE_11221_length_8695_cov_16.1032_ID_23287	fig|857335.5.peg.137	NODE_11221_length_8695_cov_16.1032_ID_23287_3242_2307	3242	2307	-	Permease of the drug/metabolite transporter (DMT) superfamily	FIG00846773	atgaccgaccgaaccacctcctttttcgcccgcccaggcagcgtgatgctgctggccaccttctgctgcctgctgtggggcagcgcctacctggcgatcaagcagggctatgccctgttccacatcgcgagcggcgacgtgccggcacagatgctgttcgccggcctgcgcttcacggcggccggtgtgatcctgctcgtggctgcccgactgatcggctggaagatcgagctgccgcagcgcgaatggctgcccgtcggcatgctggggctgacccagaccgcgatccagtacgtgttcttctacatcggtctggcctttgccaccggcaccaagagctcgatcatgaacgccaccggcaccttcttctcggtactgctggcacatttcctgtaccac…	MTDRTTSFFARPGSVMLLATFCCLLWGSAYLAIKQGYALFHIASGDVPAQMLFAGLRFTAAGVILLVAARLIGWKIELPQREWLPVGMLGLTQTAIQYVFFYIGLAFATGTKSSIMNATGTFFSVLLAHFLYHNDRLSQRCVIGCSVGFLGVAAANYGPTLLQPDFTLAGEGSVVLAAFILSAATIYGKMISQRINAIVMTGWQMSFGGLVLTAVGLITGGRMQGFTPTSLALLGYMAVLSSLAFGLWSALLKYHPVGKVAVYNFLIPVFGVALSAIFLGEAIFAWKNAVALVLVCAGIWLVTAERPKTSG
NODE_11221_length_8695_cov_16.1032_ID_23287	fig|857335.5.peg.138	NODE_11221_length_8695_cov_16.1032_ID_23287_3402_4295	3402	4295	+	LysR family transcriptional regulator YnfL		atgaattttcgccacttccattatttcgtcgtcgtcgccgaagaactgcacgtggcgcgcgccgcggtgaggctgggcattgcacagcccgccctgtcacaacagatccgcgcgctggaggagcagttgggcgtgcgtctgttccatcgcgccaaccgtcgcatcacgctgaccgaggcgggcgaggcttttctcgtcgaagcccgtgcggccctgatgcacgccgagcaggccgggcgcgcggcgcggcgcgcagcacggggcgagacggggcgcgtggatatcggctacgtcagcagtgcactggccgagctgccctttctgagcgcgctggcagcctttcgcgctacgcacccggcggtgcgtatcggcatgcacatgcgcctggccgccgaccac…	MNFRHFHYFVVVAEELHVARAAVRLGIAQPALSQQIRALEEQLGVRLFHRANRRITLTEAGEAFLVEARAALMHAEQAGRAARRAARGETGRVDIGYVSSALAELPFLSALAAFRATHPAVRIGMHMRLAADHLAALRTQTFDLVITRGPMPEPPEDYDSLVLSRQPMIVALPDSHPLATRAGIALPELAENNFLVPDDPPGCGTGHAIALLCEAARFTPRSSMVVNEMSSAVGLVAGGLGVALLPASAARFALPGVVFRPLIGGAFDSDLIAFYRRHEHSAAVLALLAALRRHAAV
NODE_11221_length_8695_cov_16.1032_ID_23287	fig|857335.5.peg.139	NODE_11221_length_8695_cov_16.1032_ID_23287_5054_4296	5054	4296	-	Exodeoxyribonuclease III (EC 3.1.11.2)	FIG00000065	atgaagatcgccacctggaacgtgaattccctcaaggtccgcctgccgcatctgctcgactggctggccaccgaatcgcccgatgtggtctgcctgcaggagctcaagtgcgaagacaaggcctttccgctggccgaaatcgaagccgcaggctaccgagccgtgagtaacgggcaaaagacctacaacggcgtggccatcctggcgaagtccgcgatcgaggatgtgacgcgcgacatcccgggctttgccgacgagcagaaacgcatcatcgccgccaccgtggatggcgtgcgcgtgatctgcgcctatttcgtcaatggacaggccgtgggctcggagaaatttgcctacaaaatggcctggctggaagcgctgaccggctggctgcacgaggaa…	MKIATWNVNSLKVRLPHLLDWLATESPDVVCLQELKCEDKAFPLAEIEAAGYRAVSNGQKTYNGVAILAKSAIEDVTRDIPGFADEQKRIIAATVDGVRVICAYFVNGQAVGSEKFAYKMAWLEALTGWLHEELARHPQLVLAGDFNIAPEPRDAHPDWKDEIHVSVPEREAFTRLLQLGLTDAFRQFEQPEKSYSWWDYRMMAFRRNFGLRIDHLLVSTALAPALTACWVDKAPRKLERPSDHAPVLLTLA
NODE_11221_length_8695_cov_16.1032_ID_23287	fig|857335.5.peg.140	NODE_11221_length_8695_cov_16.1032_ID_23287_5202_7538	5202	7538	+	Multimodular transpeptidase-transglycosylase (EC 2.4.1.129) (EC 3.4.-.-)	FIG00000011	atgctcaaacgcatcctaaccatcggtctcatcagcgctttcggcctctgcatcgtgggggcggcggcgcttgccatcgcggcttccatggcctggccgcggctgccctcgctggaggcgctgaccgagtacacgccacgcattccgctgcgcatctacaccgcggatggcgagctgatcggcgaattcggcgaggagcgccgcaccttcgtttccatcgacaaggtgccggccatgctcaagcatgccattctggctgccgaggatgaccgcttctacgaacactcgggtgtcgacgtgatggggctggcgcgggcttcgctgcgcatgctggccgggggggccaagcagggcggcagcacgatcacgatgcaggtggcgcgcaatttctacctcagc…	MLKRILTIGLISAFGLCIVGAAALAIAASMAWPRLPSLEALTEYTPRIPLRIYTADGELIGEFGEERRTFVSIDKVPAMLKHAILAAEDDRFYEHSGVDVMGLARASLRMLAGGAKQGGSTITMQVARNFYLSREQKISRKFYEILLSLKIEQQLSKDKILEVYINHIFLGNRSYGFAVAAETYYGRPLEQLKLAELAMLAGLPKAPSSFNPVVNPLRATARQQYVLRRMQELGYITTAQYDEALKEPLRLAIGRNAVQRNKPTLHAEFVAEMARQIAYERFKEQTYSSGIRVITTLRKDDQLAAYQSLRRAAIEYERRHGYRGAEGKVDLRGVGSDAEDAKSLEELVDGFPDLDEMRAAIVLESVPGQKLRAYLRGGEVIELTGRALRFPGPMMARNA…
NODE_11221_length_8695_cov_16.1032_ID_23287	fig|857335.5.peg.141	NODE_11221_length_8695_cov_16.1032_ID_23287_7854_7528	7854	7528	-	Frataxin homolog CyaY, facilitates iron supply for heme A synthesis or Fe-S cluster assembly	FIG00001224	atggcatcagcggattttctggcaacagcccaggccaagctcgatgagctggaagcaaggatagaggcggcagccgacgcggctggcgtcgacatcgacatcgaaccgcaggccggcggcattctcaagctggcgttcgaggacggcagccagatcatcgtcaatcgccacgaggcggcaggcgagatctgggtggcggcccgtgccggcggcttccattttcgcccgcaggaagacggctggcgtgacacccgcgacgccgcgctgctcgacgcgcgcctgcaggcgctgatctcgcagcaggcgggttacgagatcagttggtga	MASADFLATAQAKLDELEARIEAAADAAGVDIDIEPQAGGILKLAFEDGSQIIVNRHEAAGEIWVAARAGGFHFRPQEDGWRDTRDAALLDARLQALISQQAGYEISW
NODE_11221_length_8695_cov_16.1032_ID_23287	fig|857335.5.peg.142	NODE_11221_length_8695_cov_16.1032_ID_23287_8010_8141	8010	8141	+	hypothetical protein		atgaaacgcccgatcgtccttgtcctgttcctgagccttgtcctgactgcctgtggtatcaaggggccgctggagcatccgcgcccgccgcagaagcagtctcagtcctcgactcaaacgaacgagcgctga	MKRPIVLVLFLSLVLTACGIKGPLEHPRPPQKQSQSSTQTNER
NODE_11221_length_8695_cov_16.1032_ID_23287	fig|857335.5.peg.143	NODE_11221_length_8695_cov_16.1032_ID_23287_8617_8171	8617	8171	-	Copper metallochaperone, bacterial analog of Cox17 protein		atgcgccgtctgctgtgctgccttttcgccctgttgccattcggcctgtgggcggcagacatctcgatcagcaagccctgggtgaaaggcaccctgcccaccgctacggccacgaccgcgcacttcgaaatattcagcgatgacgccctcacgctggtggccgcacagacaccgctggccgagcgcgtggaattgcgtgtgatgcgcttcgcactcgacggcggcccgctgcgcccgcaaacggtgaccgagatcgccatccctgcgcgcaagcgcatgcagttcacgccggtcagtgagcatctggcgctggtggggctgcatcagccagtcaagggcggtcagcgcatcccgctgacactggtactacgtgcccaggatggcagcgaacggcgcgtc…	MRRLLCCLFALLPFGLWAADISISKPWVKGTLPTATATTAHFEIFSDDALTLVAAQTPLAERVELRVMRFALDGGPLRPQTVTEIAIPARKRMQFTPVSEHLALVGLHQPVKGGQRIPLTLVLRAQDGSERRVEVEALGRDLLGGPQP
NODE_11396_length_8484_cov_16.3807_ID_23629	fig|857335.5.peg.144	NODE_11396_length_8484_cov_16.3807_ID_23629_1224_25	1224	25	-	FOG: GGDEF domain		atgtcgtccgcggcaccgagcctgcccgagcaggccaatccgcatttcgtcgagtcgctggttgagctctcggcgacacgcgaaatcgaagtcactgaagatgtctatgcgcagaacggtataaagctgctggcaaagggcgcacgcgtcgacagcagcctctatgaccgcgtgatccagcacaagctgcgacgccccatcgagacgagtcttgcctgccgcgatgctttcgatagtgcccagctgaggcgcgaggccgaagccctgctggaggcgtccccgatcctgaggcgtttggcagacgatagccatggctccgagcgctccctaaaaacgcttgcccgggtgcggctgactccgcaagcagccactttgtttgccgtggccgagcaccgccgc…	MSSAAPSLPEQANPHFVESLVELSATREIEVTEDVYAQNGIKLLAKGARVDSSLYDRVIQHKLRRPIETSLACRDAFDSAQLRREAEALLEASPILRRLADDSHGSERSLKTLARVRLTPQAATLFAVAEHRRPERRTHQVKACLIALSLAKADGSTHDSRSLIGLAQASLLHDIGECYIDPAIFTREEVLGQEEWRALASHPIIGAAIARELGGLSADVQTAILQHHERLDGSGYPRGVSGEGLSRSGAILGMADTLAGMLGHDYPLSRLSVALRIMPREFSPALVSRATRLLGAREPLMEMRGVSRAEVEEIRHIRERIGAIPGLFSQLLDEQARLSPLHREGLENLFFRFIRVKRAFSSTGMDGLESLVPVLSGEELAETCQEARCVLGRVHSSQI
NODE_11396_length_8484_cov_16.3807_ID_23629	fig|857335.5.peg.145	NODE_11396_length_8484_cov_16.3807_ID_23629_1493_3466	1493	3466	+	Topoisomerase IV subunit B (EC 5.99.1.-)	FIG00000439	atggcccagacgcagtacgacgaatcctcgttccgagtccttaagggactggagccggtgcgcgagcgccccggcatgtacacccgcaccgactcgccctgccacatcatccaggaagtcatcgacaacgccgccgacgaagccttggcaggctttgcgcgcagcattcaggtacgcgtggcacgcgatggcgcgatcaccgtggcagatgatggccgcggtattccggtaggccctcatccggtggaaaagaaacccgtggtggtactggcctataccgtactgcacgcaggcggaaagttcgacaagaaatccggcaacagcgcctacgctttctccggtggcttgcacggggtaggggtagcggtcaccacggcactgtccacgcgtgtggaagtg…	MAQTQYDESSFRVLKGLEPVRERPGMYTRTDSPCHIIQEVIDNAADEALAGFARSIQVRVARDGAITVADDGRGIPVGPHPVEKKPVVVLAYTVLHAGGKFDKKSGNSAYAFSGGLHGVGVAVTTALSTRVEVEIRREGKLHRIAFTDGGRQIGELEELGSCGRQTGTRVTVWPDGRYFDSPRVPMNELERLLRSKAVLLPGVQVSLEIEQADGGFKRQEWRYQDGLPGYLREMMAGIEMLVPVFATEKYAGEDEDFAPGEGAAWALGWFDGQQIGESYVNLIPTVAGGTHEAGMRAAVFEAVKSFIEHHSLLPKGVKLQQEDVCGRMSFVLSARLLDPQFQGQVKEKLNSREAVKLVSTMLQHPFEAWINQNVEHGKAIAELAIKQAQSRLKDAQKVE…
NODE_11396_length_8484_cov_16.3807_ID_23629	fig|857335.5.peg.146	NODE_11396_length_8484_cov_16.3807_ID_23629_4251_3559	4251	3559	-	hypothetical protein		atgtcagcaatcatcagtcttatcggcagcaagggcggcacaggcaagaccacgctcgcccacctgttgtgtttcggcctggggcttatggggcggaaggctgtctgtgtgctgaccgatcccgggcgtctgccgcccccgcatggcgccctgccctatgtttcggccgacggccgtgatgcccaggcgcgccagcgtatcctgaccaccttgcgctcgcgtgaaggctgggtcggggtggtcgatggaggtgccaatcgtcttgctacggatatggagatgtatcggctctccgatctggtgttgctgcctttccgggattctcaggaagatctgcgcgtcgtctgcgaggatctcaaacgtctgcccaacgcgttggccctgcccacgcagtggccc…	MSAIISLIGSKGGTGKTTLAHLLCFGLGLMGRKAVCVLTDPGRLPPPHGALPYVSADGRDAQARQRILTTLRSREGWVGVVDGGANRLATDMEMYRLSDLVLLPFRDSQEDLRVVCEDLKRLPNALALPTQWPSNPWQFGAAQRLLETVPAELQGRVLAPVFALSCSKQLLQHPQPSVVPTSLRKLSQAFAFQMLGLLEADRTRLNAAQTALGASRRLEDMMENAPASVV
NODE_11396_length_8484_cov_16.3807_ID_23629	fig|857335.5.peg.147	NODE_11396_length_8484_cov_16.3807_ID_23629_4550_5272	4550	5272	+	GCN5-related N-acetyltransferase		atgctgcatgcgcttgaacttgccgccttcgaatcctggccttcgctggagcaggaaacccatgccggctggctgctgcgcttcgccaagggttacacgaagcgggccaactcggcgaatgcactgcacaatgccagtgctttgtcagaggatatcgaggaaatggagcgcagattccgggcccgcgatcttccgccgacctttcgcctaacttccgatccggcctctcaggctgctgacgaacaattggtcctgcgcggctaccggctgctggacccttcatacgtcatgtgtctgccactgacggccccccgatccgagatcgacattgtgttgcttgacgatctcgacgcctggcttgccgcatttcgggatatctccggcaagactggagccggg…	MLHALELAAFESWPSLEQETHAGWLLRFAKGYTKRANSANALHNASALSEDIEEMERRFRARDLPPTFRLTSDPASQAADEQLVLRGYRLLDPSYVMCLPLTAPRSEIDIVLLDDLDAWLAAFRDISGKTGAGQGIHRQILQHITHPRSLAVCCEAGLPVSCGLGVLVDGHLGLFDLATRLGYQRRGLATRLCQGLMHWGRDAGATTAYLQVFASNIAAIRLYERLGFRQLYHYWYRIKA
NODE_11396_length_8484_cov_16.3807_ID_23629	fig|857335.5.peg.148	NODE_11396_length_8484_cov_16.3807_ID_23629_6183_5287	6183	5287	-	Transcriptional regulator, LysR family		atggatcgatttgcggccatgaatgtgttctgtaaggtcgtggaactcggcagcctcgttgcggcggcgaagcacctggagatgtccacctctgccgtttctcggcagcttgcgcagctagaagcgctgctggacgctcgcctcctgaatcgcagcacacgacgcattagcctgaccgaaaacgggcgtgcttattacgaacgctgcctgttgctgctggccgatctggaagaagcggaagaaatggtcggcaatgcgacagccagccctcgcggcacgctgcgcatcactgcgccagtgagtttcggtgcatcgcatctggcacccgcattgggcgagttcgcacgtcgccacccggcgatgaagttcgatgtccaactggcggatcgaccgctggat…	MDRFAAMNVFCKVVELGSLVAAAKHLEMSTSAVSRQLAQLEALLDARLLNRSTRRISLTENGRAYYERCLLLLADLEEAEEMVGNATASPRGTLRITAPVSFGASHLAPALGEFARRHPAMKFDVQLADRPLDLVEEGLDLAIRIGRAAHQNLVARRIGNVALLTCASSDYLARHGTPQTPRELSSHACFAYAYAQEPNQWRFQRGNETVQEISFDASIGANNGTVLAELAAAGLGITRAPDFILGPLVAEGRLQTILEEWPGPPLPIYAMYPSRKHLSARVRSFVEFMEGWLARQPQ
NODE_11396_length_8484_cov_16.3807_ID_23629	fig|857335.5.peg.149	NODE_11396_length_8484_cov_16.3807_ID_23629_6333_6743	6333	6743	+	putative membrane protein		atgcaagacacacactcatctgcgctggctgccttggtgctgcgcctgacactcgggatagcactgctggctcatgctgccttgaagatttttgtttttaccgttcccggcactgtcggattcttcgcctcgcttggcttgccggccattgcggcctacctcacgatattcggcgagattttcgggggcctggggctgctggcgggattccgcacccgcctcgttgcactgctgacactgccgatcctgcttggcgccacctgggcacactcgggcaacggctggatgttcaacgcgcccaatggtgggtgggaatatcctgccttcatggttgcaaatgccatcgcgttggcgctcctgggcgccggcgcctggtcctgggacaactggtacgccaag…	MQDTHSSALAALVLRLTLGIALLAHAALKIFVFTVPGTVGFFASLGLPAIAAYLTIFGEIFGGLGLLAGFRTRLVALLTLPILLGATWAHSGNGWMFNAPNGGWEYPAFMVANAIALALLGAGAWSWDNWYAKRAA
NODE_11396_length_8484_cov_16.3807_ID_23629	fig|857335.5.peg.150	NODE_11396_length_8484_cov_16.3807_ID_23629_6798_7583	6798	7583	+	FIG074102: hypothetical protein	FIG00904518	atgagtgccatgcccgttctgttcatttcacacggctcccccatgcatgcggtgcaggagcatccggcagcactcgcctgggtttcggcagtcagccagctgacacgcccgaaggctgtgctgatggtttccgctcattgggaaagcggaccgccgttgatcggtggcgcagagcagccggaaacgattcatgacttcggtggcttccccgatgagttgtatcgcatccgctatccagcgccgggagctccggatctggccgcacgcatacagaatctgctgcgcgatgccggactggaagccggtatcgatggttgccggggattggatcacggggcctgggtgcctttgctgaaaatgtatcctcaggctgacgtcccggtgctgcagctttccgtg…	MSAMPVLFISHGSPMHAVQEHPAALAWVSAVSQLTRPKAVLMVSAHWESGPPLIGGAEQPETIHDFGGFPDELYRIRYPAPGAPDLAARIQNLLRDAGLEAGIDGCRGLDHGAWVPLLKMYPQADVPVLQLSVQPGLDARHHLKLGAALSHLRKEGVLIVGSGHMTHNLRDWFHGARIDAGPYAREFRDWVAKHLLAKDIDALSAWEEQAPHARRAHPTPEHFLPLFVALGAAKDDLAPECLHSSFEYGVLAMDAWRLASA
NODE_11396_length_8484_cov_16.3807_ID_23629	fig|857335.5.peg.151	NODE_11396_length_8484_cov_16.3807_ID_23629_7787_7599	7787	7599	-	hypothetical protein		ttggtgcgcccgcgccgctcactgctgatctatcaggcggcaaagcccgagatatcgctaccagctgggcaggaggtgtcgatgatggcggcgcctgctgttcccgggcagcaccgacatctgcgcatcctgttgctgcttttgctgggtgtggcgctggcagggatctttgttcttctcaacggttga	MVRPRRSLLIYQAAKPEISLPAGQEVSMMAAPAVPGQHRHLRILLLLLLGVALAGIFVLLNG
NODE_11396_length_8484_cov_16.3807_ID_23629	fig|857335.5.peg.152	NODE_11396_length_8484_cov_16.3807_ID_23629_8037_8216	8037	8216	+	hypothetical protein		ttgagtctggaagccgcctgggatgggaggcagtccaggaaagtcgtctgtttccccaacgctttcgacacccaggggattctcgggcggctgaatgacgacggcctccatcgcaggcattggctgcatgtgcacgatcatgccgatgcggcccagctcgcggatatagcgctcgcttaa	MSLEAAWDGRQSRKVVCFPNAFDTQGILGRLNDDGLHRRHWLHVHDHADAAQLADIALA
NODE_11581_length_8281_cov_8.21225_ID_23997	fig|857335.5.peg.153	NODE_11581_length_8281_cov_8.21225_ID_23997_1265_228	1265	228	-	Uncharacterized protein ImpA	FIG00003132	atgattcccgggggaaatccatgtggcgaagacatgtccttctccagcgaattcgatctgattcaaaaagcccgcaggcaggatgatcctgatctcgaacaaggtgaatggataacttcactcaaggaggcggactggaaacaggtgacaaaagtctgtcaagacctgctactccatcgcaccaaagatctccgtctcgcatcctggctgactgaggcgctggcaaaactgcatggaatcgaggggctgaagatcggattcgaagtgatggccgtgctcacagatgaattctgggaacagttgtacccagacatggaagacggcgaccctgaacaacggatcggcaacattgcatggctactggggcgcagccagcaattgattcgcgagtttcccgtc…	MIPGGNPCGEDMSFSSEFDLIQKARRQDDPDLEQGEWITSLKEADWKQVTKVCQDLLLHRTKDLRLASWLTEALAKLHGIEGLKIGFEVMAVLTDEFWEQLYPDMEDGDPEQRIGNIAWLLGRSQQLIREFPVNDHKGLRHTLLDLEGARALQSQLERNSEAAETQTDRISLQQIREAQLRTPSSFYLQQLEGSRQCIAALRLLAAAVDRHLGLDGPSFSPLIDELEGYAAELSRLANENGVNAGASEVPTHQPGDPAISGIEPAPSFSNQLGAPTNRTQALRQLREVAAFFRRTEPHSPVAYLAEKAARWGEMPLHIWLKTVLKEDGALARFEDILDFDESSQN
NODE_11581_length_8281_cov_8.21225_ID_23997	fig|857335.5.peg.154	NODE_11581_length_8281_cov_8.21225_ID_23997_1615_2565	1615	2565	+	probable methyl-accepting chemotaxis protein		atgacgatcgcgcgcaagatcgcacttatggttgcgttggcactggtcaccagtgccgtggtttcggcggtatccctgttcggattgcagcaggtgaacggaggcgtcactgccattgctgaaaaaaccttgccagcagtcttggctaccggtgacatgcgggcccgataccttgagctgcatgccgcagcctatgaccgaatcagcattgcggatccagatcaggcgaaggtcgcagacgaaaagatgcaggcgctggtcgactcaatcgtccagcagatcatcttctatgccgagcacacgacagacgaggcggagaagaaagtgctcgatgatgcgaggctggccatctctgcttacgtggggcgcatgactcaggtccgcaatcttgccgccatg…	MTIARKIALMVALALVTSAVVSAVSLFGLQQVNGGVTAIAEKTLPAVLATGDMRARYLELHAAAYDRISIADPDQAKVADEKMQALVDSIVQQIIFYAEHTTDEAEKKVLDDARLAISAYVGRMTQVRNLAAMGEREMAMGVMQTQVGPIHRQLAEAFDGLLKVRTAEAGAVGKMAERTYSSTLGLSILAALIGLVLIGCAGFFIGRSVVRPLSQMQQAITHAVESLDFTDNLKVASKDEVGQTLNAYNRLLQRLRASFSEVQQASARMLSAAEQADGSARGIAANSRQQSDAATGMASAVEQLTVSISVVAHQAE
NODE_11581_length_8281_cov_8.21225_ID_23997	fig|857335.5.peg.155	NODE_11581_length_8281_cov_8.21225_ID_23997_2617_3228	2617	3228	+	Methyl-accepting chemotaxis protein	FIG01954797	gtgatcctggagaccgtcgggcggatccaggccatctcggataccgtcgaggcggcctccgcacgtatcgaaaccttgcggggcgacagcgaaagcatttctgccgctgcgggcatcatcaaggagattgcggaacagaccaatctgcttgctcttaatgccgcgatcgaggccgcccgtgcgggagagcagggaagagggtttgccgtcgtggctgacgaggtccgcaaacttgccgagcggacggccaaatccacgcaggagatatccgtattgctagcgcgtatgcaggaaagcgcccatgccgcggttgatacgatggaaagtgcggtgcgggaggtcgcatccggtgtggagcatgcgaagcaggcaggagaatccatccatgccatcagggat…	MILETVGRIQAISDTVEAASARIETLRGDSESISAAAGIIKEIAEQTNLLALNAAIEAARAGEQGRGFAVVADEVRKLAERTAKSTQEISVLLARMQESAHAAVDTMESAVREVASGVEHAKQAGESIHAIRDGAGAVVGMVSEITDAVREQSAASTTIAQQIEQIAQMTERNSAAASASAQAVDQISSMSRDIARALAEYKV
NODE_11581_length_8281_cov_8.21225_ID_23997	fig|857335.5.peg.156	NODE_11581_length_8281_cov_8.21225_ID_23997_3645_3301	3645	3301	-	FAD pyrophosphatase (EC 3.6.1.18)	FIG01958989	atggagaacgacgaaagcaccgcacaggcggcccttcgggaaaccaccgaagaagcctgcgcgcacatagcgctcgaggggccgtacaccttgatcagcattccacaaatcaatcaggttcatctgatctatcgcgcacgtttgctagatgtggacttttctcccggtgaagaaacccttgagacacgcctgttcaccgagcctgagattccttgggacgatatcgcctttcgttctgtcgccctgacactgcaacactattttgcagaccgtgccggcaaccagtattcccttcacgagtcctcgctcagcgtaggcgatcgggatagccgaaagccccggtaa	MENDESTAQAALRETTEEACAHIALEGPYTLISIPQINQVHLIYRARLLDVDFSPGEETLETRLFTEPEIPWDDIAFRSVALTLQHYFADRAGNQYSLHESSLSVGDRDSRKPR
NODE_11581_length_8281_cov_8.21225_ID_23997	fig|857335.5.peg.157	NODE_11581_length_8281_cov_8.21225_ID_23997_4024_3878	4024	3878	-	hypothetical protein		gtgtatctcaagtcgattgatcattcattgcgcctcaaggggcgcgctcctcccgtcaccggccaccacttttactcgcacgcgccatggacgcgcgggcacgcgggcataatcccctcagacacaacattgctcccgccctcttga	MYLKSIDHSLRLKGRAPPVTGHHFYSHAPWTRGHAGIIPSDTTLLPPS
NODE_11581_length_8281_cov_8.21225_ID_23997	fig|857335.5.peg.158	NODE_11581_length_8281_cov_8.21225_ID_23997_4001_5587	4001	5587	+	GGDEF/PAS/PAC-domain containing protein		atgatcaatcgacttgagatacacgacacctggaatggcctggtaactggctggaaacaggtctggcaggattgtgccgacctggagcgctgggctgcgttcatgctgcagtgtgatcgcctgctcgcattggcgcgtgcccagtccttgggtgaactggagcaggcactgcagcccttggtggatttgctgggcgatctgcgcgtgccggggcaggctgaggtagccgaggttgaccgtctgttgcctggggtgttttccgtcgtgcgagaggtttgcagtcctggtagccgccgatcgatgaagggctatgcgccggaagatgatggtcttcctctggtggtgatgctgacgcccgatgctactgcggttcgagaattgttgctccagatggagcat…	MINRLEIHDTWNGLVTGWKQVWQDCADLERWAAFMLQCDRLLALARAQSLGELEQALQPLVDLLGDLRVPGQAEVAEVDRLLPGVFSVVREVCSPGSRRSMKGYAPEDDGLPLVVMLTPDATAVRELLLQMEHYGYAFKVFAEYRAGLLAAVAERAVALVVDIGENGQRLPAALADEIARRGLKWFVMSARGDFQLRLQSVRWGAQGYFTEPVNINALAEAIDPLVYAGRDDPFRVLILDDSVTVLASIRRALEQVPNVTVRAIRQPEVILETLLDFSPDVLLLDFHMEGCNGLEVAKIIRQNGAFESIPIVYLTSETSESVQVEAMRHGGDDFLTKPISHAQLVSSVISKAERYRGLRKLMVEDSLTGLFNHVKTKALLQQALLQGERQQSSICYAIL…
NODE_11581_length_8281_cov_8.21225_ID_23997	fig|857335.5.peg.159	NODE_11581_length_8281_cov_8.21225_ID_23997_5687_7618	5687	7618	+	diguanylate cyclase/phosphodiesterase (GGDEF & EAL domains) with PAS/PAC sensor(s)	FIG00561534	atggttcttcctattgagacctcccgctttgagcaactgaaagcctcaggagatcttccttcgcccaagggcactgcgcttgcagtgatgcgcatgacgctgctggaagatgtctcgatggcagaactggcgcaactgatccgtacggatccggcttttgttgggcgattgatcaaggcggccaacggcattatcggctacgggagacgccccattgtgtcggtccaggatgcgttgaccgtgctcgggctgccagctgtacgcaacatggcgctggggttctctctgctcggtaattatcagacaggcgcttgcgatggctttgactacggcgcttactggtcttcctctttgttgatcgcggtggcaacacaggcggtgacgctgagaacccgggta…	MVLPIETSRFEQLKASGDLPSPKGTALAVMRMTLLEDVSMAELAQLIRTDPAFVGRLIKAANGIIGYGRRPIVSVQDALTVLGLPAVRNMALGFSLLGNYQTGACDGFDYGAYWSSSLLIAVATQAVTLRTRVAAPDETYCLGLLTRVGELAMATLYPHDYSLLLCEAGGDLRALLELEARSFAMTHAELGAAMLADWGLPKLFCDVTFCVARGEENPHAEGSREAVLAVTLQLARSISDLCLADVDARPAFARQVQLVGSRLSFDAEECASLTDAVTREWHEWGALLNVHTGQLPPFSEMIQPTPLAVTPMEEQMSEAGGIRLLMVGSDQTHADHVREVLAGACRMIVVPDSDYAKATELALELLPELVMLPWQADAAGFVQTLRKTRVGKTMFVLAY…
NODE_11581_length_8281_cov_8.21225_ID_23997	fig|857335.5.peg.160	NODE_11581_length_8281_cov_8.21225_ID_23997_7910_8191	7910	8191	+	Flagellar transcriptional activator FlhD	FIG00001899	atgaatctttcctacctgatgctggcacagcagatgctgcagtccgatcgagtcggtgcgatgctcaagcttggtgttggagaggatgtggctgagctgatcgagaatctgacgcctgctcaaatcctcagaatggcctcttgtgacatgcttctctgccgcttccggttcgatgacaatctgttggttggcctgttgtccaatcatggagccgacagcatggtttcacgcctgcatgccacgattttggctgctggcaagccggtagagcatctggcttaa	MNLSYLMLAQQMLQSDRVGAMLKLGVGEDVAELIENLTPAQILRMASCDMLLCRFRFDDNLLVGLLSNHGADSMVSRLHATILAAGKPVEHLA
NODE_11753_length_8099_cov_6.76231_ID_24327	fig|857335.5.peg.161	NODE_11753_length_8099_cov_6.76231_ID_24327_2377_941	2377	941	-	Carboxyl-terminal protease (EC 3.4.21.102)	FIG00000946	atgagcagactcaaacaggcaggcttggttctcagcggcgtatgtgccggtgtattgatcagcctgaccgtcgccaccagtgcgagccgtgagactgcggtcagcagcctgccggtagatgagacgcgtaatctgtccgatgtcttcaacagcatcaagcagcattacgtcgaacctgtggacgacaaaaaactgatcaacgatgcgatcagcggcatggtcgccggtttggatccgcattcggcctatctcgatcaagaggctttccgtgacatgcagatttcgatcaaaggcgagttcggtggccttgggatagaagtcacgatggaagacgggttggtcaaggtggtcagtccgatagaagacactcccgcctttcgtgccggggtaaaggctggt…	MSRLKQAGLVLSGVCAGVLISLTVATSASRETAVSSLPVDETRNLSDVFNSIKQHYVEPVDDKKLINDAISGMVAGLDPHSAYLDQEAFRDMQISIKGEFGGLGIEVTMEDGLVKVVSPIEDTPAFRAGVKAGDLIFKLDDKPVRGLSLNDAVKLMRGQPKTDILVTILRKGESNPIKVKLTREVIKVRSVRSKVVEPGYGYLRVAQFQEQTTADLARHIDDLYKGGELKGLVLDLRNNPGGLIDAAVGVSAAFLPAKSLVVYSEGRIADARRKYHAIPEEYGRGQGDVLRNLPKGIKNVPMVVLVNGGSASASEIVAGALQDYNRAKILGIRSFGKGSVQSIFPIVSGESAVKLTIAKYFTPNGRSIQAKGIDPDYVVDETSNGSSEPLFREADLLRH…
NODE_11753_length_8099_cov_6.76231_ID_24327	fig|857335.5.peg.162	NODE_11753_length_8099_cov_6.76231_ID_24327_3591_2395	3591	2395	-	Lipoprotein NlpD		gtgagttttcaggcaggcctcgctattctggctctgagcggagcctgcctgatttccattccggcgtttgcagccacgccggcagaagcgcgacagcaagaactgaagacgttgcgtgatcacatccgcagcgttcagaaggaaatcgctcatggcgaagagcatcaggaagaggccagcgacggattggccgttgccgacaaggccatctccttcgcgcaggccaggctgcgagaactgactcagcagcgcacccgtattgaaggtgaaattgcacgcctccagagcgaacagcaagcgctggaaacacgaattgcccggttgcgcaaacagcttggggatgccatctaccgcctctatgtagaaggtgggcaggcgggcacccggcgactactcagc…	MSFQAGLAILALSGACLISIPAFAATPAEARQQELKTLRDHIRSVQKEIAHGEEHQEEASDGLAVADKAISFAQARLRELTQQRTRIEGEIARLQSEQQALETRIARLRKQLGDAIYRLYVEGGQAGTRRLLSGDDPNQIARDAHYIEQIAKQRAAAIDEARAARVALDNVLAQAETKHAELKSLEASQRETQRSLQRERQRQSEVLHQISTQLRDQRRQIERLKNDETRIEKLLRGLERIARSTPRPTPPVTGVEPANRAVQGGGVFAAQRGNLPWPVKGSLTHRFGSPREEGLTQWRGIFLKATRNAEIHAVAAGRVAFSDWLRGFGNLVIIDHGDDYLSVYGNNEAIFKLAGDEVSAGEVIASAGSSGGQDESGLYFEIRHRGQPQDPSRWLTAK
NODE_11753_length_8099_cov_6.76231_ID_24327	fig|857335.5.peg.163	NODE_11753_length_8099_cov_6.76231_ID_24327_4334_3588	4334	3588	-	Phosphoglycerate mutase (EC 5.4.2.1)	FIG00005840	atgtacaagatcgtattgatgcgccacggtgaatccacctggaatctggaaaaccgcttcacgggctggaccgacgtggatctcacgccgcgcggtgtcgaagaagcccagatcgcaggtaagctgctaaaggaaaagggattcgccttcgatatcgcctacacgtcgatgctcaagcgcgccaacaagaccttgaacggagtgctcgaggagctcgatcaactgtggatcccggtggagcacaactggcgtctgaacgaacgccattacggagccttgcaaggattgaacaagtcagaaaccgcagccaagttcggtgaggagcaagtgctggtttggcgtcgttcctacgatgtgcccccgcccgcgctggagctggacgacccccgcatggaagac…	MYKIVLMRHGESTWNLENRFTGWTDVDLTPRGVEEAQIAGKLLKEKGFAFDIAYTSMLKRANKTLNGVLEELDQLWIPVEHNWRLNERHYGALQGLNKSETAAKFGEEQVLVWRRSYDVPPPALELDDPRMEDKAPRYADMKPGEFPRTECLKDTVARFVPYWTDVIAPVVKSGKRVIIAAHGNSLRALVKYLDNMSEEAILKLNIPTAQPLVYELDADLKPIKSYYLADPSVIEAAMNAVANQGKAK
NODE_11753_length_8099_cov_6.76231_ID_24327	fig|857335.5.peg.164	NODE_11753_length_8099_cov_6.76231_ID_24327_4511_4936	4511	4936	+	FIG136845: Rhodanese-related sulfurtransferase		atggatttcttcctgcagaacatctttctcattacgttggctatcgtcagcggtcttgccctactccttcccatcctgcggggttctggcgccaattcggtcacgccgtcccaggccgtgatgctgattaatcggcagaatgcggtattgctcgatgtgcgtgagcaggctgagcgcgatgcgcaacatgttgcggactcccgccatatcccggctggtgaactgcccaagcgcatcgaagagctttcccgcctgcgcagccgccctgtcatcgtgctgtgcgacaacggctctcgctcacaacgggccatgggcgtattgcacaaggccggttttgagcaggtgttcaaactctccggtggcatccgcgcctggaaggatgccggacaacctctgagc…	MDFFLQNIFLITLAIVSGLALLLPILRGSGANSVTPSQAVMLINRQNAVLLDVREQAERDAQHVADSRHIPAGELPKRIEELSRLRSRPVIVLCDNGSRSQRAMGVLHKAGFEQVFKLSGGIRAWKDAGQPLSSAKTGAAA
NODE_11753_length_8099_cov_6.76231_ID_24327	fig|857335.5.peg.165	NODE_11753_length_8099_cov_6.76231_ID_24327_4951_5079	4951	5079	+	Glutaredoxin 3 (Grx3)	FIG00229235	atgtatacgtcggccgtatgtccctactgtatacgtgctgagcagttgttgcgccgtaagggggtcgaggagatcgaaaagctgcgtgtcgatctcgatccctcgatcccgcactgcgtgagcgcatga	MYTSAVCPYCIRAEQLLRRKGVEEIEKLRVDLDPSIPHCVSA
NODE_11753_length_8099_cov_6.76231_ID_24327	fig|857335.5.peg.166	NODE_11753_length_8099_cov_6.76231_ID_24327_5076_5207	5076	5207	+	Glutaredoxin 3 (Grx3)		atgatgagcctgaccgggcgtcgcacggtgccacagatcttcatcggtacgacccatgttggagggtgtgacgatgtttatgccctggagcaacaaggcaagctggattctctgctcgccgggaatccctga	MMSLTGRRTVPQIFIGTTHVGGCDDVYALEQQGKLDSLLAGNP
NODE_11753_length_8099_cov_6.76231_ID_24327	fig|857335.5.peg.167	NODE_11753_length_8099_cov_6.76231_ID_24327_5309_5779	5309	5779	+	Protein export cytoplasm chaperone protein (SecB, maintains protein to be exported in unfolded state)	FIG00001903	atggatcaagcacaacaagccgtcttcaagatcgagaagctctacgtcaaggatttgtcgctggaggtgccgaacgctccggccatctaccttgatgcgacgacgcctgaagtaaacgtggatatcgccacacaggccggtatcgtgggcgacggtttctacgaagtcactctctcggttactgtaacggccaagattgcagaagacgaaaaggtcctgttcctggtcgaagtggcccaaagcggcgttttccagatccgcaacgtgcctcaggaagaacttgagcccattctgctcatcggctgcgcaaacatcctgttcccgtatgttcgtgaagccgtatcagatgccgtgacccgcgcaggcttccagccggtgctgctctcgcctgtcaacttc…	MDQAQQAVFKIEKLYVKDLSLEVPNAPAIYLDATTPEVNVDIATQAGIVGDGFYEVTLSVTVTAKIAEDEKVLFLVEVAQSGVFQIRNVPQEELEPILLIGCANILFPYVREAVSDAVTRAGFQPVLLSPVNFEAMYEARQQQLAAEQPKIEVPIQ
NODE_11753_length_8099_cov_6.76231_ID_24327	fig|857335.5.peg.168	NODE_11753_length_8099_cov_6.76231_ID_24327_5802_6239	5802	6239	+	hypothetical protein		gtgatcaagcgtatctgcttcctgctttccctgttggcagcgccgctggcagcgcaggcctttgactacaaaaacgtcaccgagcacgcgattgtctacgatgccggctccactaaggccacgtcgctgttcattctgcggcgtggcaccccggttgaagtcatcgtttcgatcaatcgctgggtcaaggttcgcgaagcctcgggcggactgggttgggttgagagttcccagctcggtgatgctcgccaggtgatcgttacggaagcgcgggccagcttgcgagaaagtccggacgaaaacgccccggaagtgcttgtggtaggtcgtgacgtattgcttgaagtcctggaaagcccggcaggctcctggctgaaggttcgccaccaggatggccag…	MIKRICFLLSLLAAPLAAQAFDYKNVTEHAIVYDAGSTKATSLFILRRGTPVEVIVSINRWVKVREASGGLGWVESSQLGDARQVIVTEARASLRESPDENAPEVLVVGRDVLLEVLESPAGSWLKVRHQDGQAGFISIRSIWGI
NODE_11753_length_8099_cov_6.76231_ID_24327	fig|857335.5.peg.169	NODE_11753_length_8099_cov_6.76231_ID_24327_6260_7234	6260	7234	+	Glycerol-3-phosphate dehydrogenase [NAD(P)+] (EC 1.1.1.94)	FIG00000309	atgggcgcgggcgcctggggtaccgcgctcgccaattcctatgccagtagtggtcatcaggtcacgttatggagcatcgaggctgaccatgtggcacagatgcaggccgagcgacgcaatcaacgctatctgcccgatatcgcgttccattctgatctgatcatcagtgcggattttgaattgtcttgccagacggccgatcttgcactgatcgtgactcccgtcgcgggcctgcggccgacattggcaagactggcgcagacctgccctgctctgcctgtcttctgggcctgcaagggtttcgaagctggaacaggcaagctgccgcatgaggtcgccgaggagttccttgcgccttcggtcgggcgtggtgtgctgaccgggccgagctttgcccaa…	MGAGAWGTALANSYASSGHQVTLWSIEADHVAQMQAERRNQRYLPDIAFHSDLIISADFELSCQTADLALIVTPVAGLRPTLARLAQTCPALPVFWACKGFEAGTGKLPHEVAEEFLAPSVGRGVLTGPSFAQEVAVGLPCAITLAATELTFARAWVAQLMHPRLRLYANDDVVGAEIGGAVKNVLAIAAGISDGLGFGLNARAALVTRGLAEIARLSEALGGRRETLMGLAGMGDLILTCTGDLSRNRRVGLALAEGKSLEQILMDLGHVAEGVLTTATVVERASALGVDMPITRAVHEVIQGRLAPRDAIEQLMTREARTEA
NODE_11753_length_8099_cov_6.76231_ID_24327	fig|857335.5.peg.170	NODE_11753_length_8099_cov_6.76231_ID_24327_8000_7290	8000	7290	-	4-deoxy-L-threo-5-hexosulose-uronate ketol-isomerase (EC 5.3.1.17)	FIG00003227	gtggaccgcatcgtattcgggggcattgtgccgcttggcgcgccgatcagcctgccggatctaggcaagaccttcggcacggcctatttcctcgagcgccgcgagatgggcgtgatcaacatcggtggagacggcagcatcgtggttgatggcgtgacctacgacgtggggcacgaagaggctctctacattagcaagggcgccaaggagttgggattctcgagcacggatgcaggcaacccggccaagttctactacaacagcacgccggcgcatgcgagctatccgcataagaaggtcacccgcgagatggccagcccgcagactatgggagacgccaagacctcgaaccggcgcacgatgaacaaatatatcgtgccgggagtcgtagactcctgc…	MDRIVFGGIVPLGAPISLPDLGKTFGTAYFLERREMGVINIGGDGSIVVDGVTYDVGHEEALYISKGAKELGFSSTDAGNPAKFYYNSTPAHASYPHKKVTREMASPQTMGDAKTSNRRTMNKYIVPGVVDSCQLIMGLTKLEEGSMWNTMPCHTHERRMEVYLYFNMSPDAVVFHMHGEPTETRHLVIRNEQAVISPSWSIHTGVGTQSYTFIWEMAGENQTFPDMDHVAMTTLK
NODE_11958_length_7871_cov_7.00205_ID_24723	fig|857335.5.peg.171	NODE_11958_length_7871_cov_7.00205_ID_24723_294_2570	294	2570	+	NADP-dependent malic enzyme (EC 1.1.1.40)	FIG00000777	atggacgacaacctgcgcgccgccgcgctggaatatcacgctcagccgaggccgggcaaacttgcaatccaggccaccaaggttttgagcaatcagcgcgatctttcgctcgcctactcgcccggcgtcgccgccgcctgcgatgccatcgtggcagacccggctaccgccagcctctacaccgcgcgcgccaacctcatcggcgtggtcaccaacggcaccgccgtgctggggctgggccccatcgggccactggcagccaagcccgtgatggagggcaaggcagtgctgttcaagaagtttgccggcatcgatgtattcgatatcgaactggccgagcgcgatccggaccggctggtggacatcatcgctgcgctggagcccacgttcggtggcatc…	MDDNLRAAALEYHAQPRPGKLAIQATKVLSNQRDLSLAYSPGVAAACDAIVADPATASLYTARANLIGVVTNGTAVLGLGPIGPLAAKPVMEGKAVLFKKFAGIDVFDIELAERDPDRLVDIIAALEPTFGGINLEDIKAPECFYIERRLRERMRIPVFHDDQHGTAIVVGAAILNGLHLVGKPLDKVKLVTSGAGAAALACLGLLEKLGIPLENIWVTDIHGVVYEGRTEDMDPLKARYAKPTQARALGEIIKDADVFLGLSAAGVLKPELLAHMAPDPLILALANPVPEILPALAREVRPDAVIATGRSDHPNQVNNVLCFPFIFRGALDVGATTINDEMQLAAVQALAALAREEQSDVVASAYGEQPVCFGREYLIPRPFDPRLIVRIAPAVAKAA…
NODE_11958_length_7871_cov_7.00205_ID_24723	fig|857335.5.peg.172	NODE_11958_length_7871_cov_7.00205_ID_24723_3160_2729	3160	2729	-	probable membrane protein YPO3302	FIG01314061	gtgagcgactggctttcgctgccggggctgttcctcgcctcgctgctggccgccacgctgctgcccacctcatccgaagcactgctggcggccttgcagctggatgggcaacacccgacctggagcctgctgctggtcgccggcacgggcaacacgctgggctcggtggtcaactgggtgctcgggcgctatctgctgcactggcacgcacgacgctggttccctttcagcgcggcacagctcgcgcgcgccgaggtgcgtttccagcgctgggggctgggctgcctgctgttcgcctggctgcccgtcatcggcgatccgctgaccttcatcgccggcatgctgcgcgtacgtttctggccgttcctgctgctggcctgcggcaaattcctgcgctat…	MSDWLSLPGLFLASLLAATLLPTSSEALLAALQLDGQHPTWSLLLVAGTGNTLGSVVNWVLGRYLLHWHARRWFPFSAAQLARAEVRFQRWGLGCLLFAWLPVIGDPLTFIAGMLRVRFWPFLLLACGKFLRYVVVLYAANWF
NODE_11958_length_7871_cov_7.00205_ID_24723	fig|857335.5.peg.173	NODE_11958_length_7871_cov_7.00205_ID_24723_5106_3157	5106	3157	-	2-acylglycerophosphoethanolamine acyltransferase (EC 2.3.1.40) / Acyl-[acyl-carrier-protein] synthetase (EC 6.2.1.20)		ttgatctacaccaccgccacctgccaccgtctgttccgcctcttctcgcgccgtctggtcgattacctcgccatcgatcccaacaatccgatggagatgaagggcgtgatccgcctgatcgaaagcggccgcccggtgctgatcttccccgagggccgcgtcaccaccaccggcaacctgatgaagacctacgacggccccggcttcatcgcggccaaatccggagccaccatcctgccggtgcgcatcgacggcgccgcgcgcagccgcttctcgctgctcggcagccaggctccccgcacctggttgccccgcatccgcctgttcgtgctgccgcccacgcgcatcaccccgcccagcgcgccacacggcgaacagcactacctcgctggccaggcc…	MIYTTATCHRLFRLFSRRLVDYLAIDPNNPMEMKGVIRLIESGRPVLIFPEGRVTTTGNLMKTYDGPGFIAAKSGATILPVRIDGAARSRFSLLGSQAPRTWLPRIRLFVLPPTRITPPSAPHGEQHYLAGQAMRRVMTDLMFAGRREQTLPEALVEAARRRGRGWRLLGDVEHTDYSYNDILRSAWVLGRKIAQRTAPDETIGLLLPNVGAPLALLFGLSAWRRIPALLPYTAGNTSLRAACTAAGIRRVISSREFIARFKLEGSLRALDGLEVLWLEDLRDAISLGDRVWWLLRARFSPLCACPRSHADDPALVMFTAGSEENPKGVLLSHRALLANVAQIRAVLDISSNDVVLNALPLHHSFGLTAGALIPLLSGAKLFLYPSPQHHRVVPELAYN…
NODE_11958_length_7871_cov_7.00205_ID_24723	fig|857335.5.peg.174	NODE_11958_length_7871_cov_7.00205_ID_24723_5744_5304	5744	5304	-	2-acylglycerophosphoethanolamine acyltransferase (EC 2.3.1.40) / Acyl-[acyl-carrier-protein] synthetase (EC 6.2.1.20)	FIG01953891	atgagtggctacctgcgcgtcgacaaccccggcgtgctggagccgccagcctccgaactagggccgggctggtacaacacgggtgacatcgtcgaaatcgacgacgacggtttcgtgcacatcgttggccgtctcaagcgtttcgccaaggtggctggcgaaatgatctcgctcgaagtggtcgagcgcctggccatcgtcgcttcgccggacgccatgcacgcagcctccagccagccggacgcctcgcgcggcgaaaacatcctgctgtacaccacggacgcgactctcacccgcgatcggctgatcgccgccgcacgcgaatccggcagcccggaaatcgccgtgccgcgccggatcatcacggtcgaggccctgccactgctgggcaccggcaag…	MSGYLRVDNPGVLEPPASELGPGWYNTGDIVEIDDDGFVHIVGRLKRFAKVAGEMISLEVVERLAIVASPDAMHAASSQPDASRGENILLYTTDATLTRDRLIAAARESGSPEIAVPRRIITVEALPLLGTGKTDYVTLKQWAEAA
NODE_11958_length_7871_cov_7.00205_ID_24723	fig|857335.5.peg.175	NODE_11958_length_7871_cov_7.00205_ID_24723_6235_5759	6235	5759	-	2-acylglycerophosphoethanolamine acyltransferase (EC 2.3.1.40) / Acyl-[acyl-carrier-protein] synthetase (EC 6.2.1.20)	FIG01953891	gtggatttctcggcggaggacaaggttctcaacgcgctgccgctgttccactccttcggcctgaccatcggcggtctgttgcccgccatctccggcgcgcgcgtgttcctgtacacctcgccgctgcattaccgcgtgatcccggaactggcctacgaccgcggctgcaccatcctgctgggaacctccaccttcctcgccaactacgccaagcacgcccacccttacgacttctaccgcctgcgctacgtggtggccggcgctgaaaaactcacctccacggtacgtagcctgtggttcgagaagttcggcatccgcatcctcgaaggctacggagccaccgaatgcgcaccggtgctcgcggtgaattcgcgcatggcctaccgctcgggctccgtc…	MDFSAEDKVLNALPLFHSFGLTIGGLLPAISGARVFLYTSPLHYRVIPELAYDRGCTILLGTSTFLANYAKHAHPYDFYRLRYVVAGAEKLTSTVRSLWFEKFGIRILEGYGATECAPVLAVNSRMAYRSGSVGQLLPGIQAKLVPVPGVETGGALHV
NODE_11958_length_7871_cov_7.00205_ID_24723	fig|857335.5.peg.176	NODE_11958_length_7871_cov_7.00205_ID_24723_7456_6251	7456	6251	-	2-acylglycerophosphoethanolamine acyltransferase (EC 2.3.1.40) / Acyl-[acyl-carrier-protein] synthetase (EC 6.2.1.20)	FIG01953891	atgaagctggccagacgtctgggcgtgcttgccctgcgcttactcgcacgcctgttcttccgccttgaagtccggggcgatccggacgtacgcgccgaacgcctgctcatcatcgccaaccacgaatcactgctcgacgggctgctgctcggcatcaccctgccgcatgactctgtattcgtggtgcataccggcgttgtccgcagtccgctgttccgagccgtactgaatctggtggatcatctggcggtcgaccctaccagcccgatggcgatgaagaccatcatccgtctggtggaatccggccgcccggtggtgatcttccccgaaggccgcatcaccaccaccggcagcctgatgaagacctacgacggcccggccttcgtcgcggcgcgcacc…	MKLARRLGVLALRLLARLFFRLEVRGDPDVRAERLLIIANHESLLDGLLLGITLPHDSVFVVHTGVVRSPLFRAVLNLVDHLAVDPTSPMAMKTIIRLVESGRPVVIFPEGRITTTGSLMKTYDGPAFVAARTRATILPVRIDGAARTYFSRLSGHQPRQLFPRITICIQPVTRLEMPQVPTARARRRIAGERMRRLMQEMIFASRPRQTLFEALLSAISIHGRSWALVEDIKQIEYTYRDLLKMTLALGRLVSRKCADEERVGVLMPNLAPTVGLIFGLSAFRRVPAMLNYTAGAEGMLASCQAAQIKRIVTSRAFIEQGKLEDRIELLSKHCEILYLEDLRGEMTLKDKLWLVLWAMHFPQWVVPRGDAEEPAAVMFTSGSEGKPKGVVLSHRAILA…
NODE_11_length_137584_cov_6.95087_ID_19	fig|857335.5.peg.177	NODE_11_length_137584_cov_6.95087_ID_19_1171_581	1171	581	-	Adenosylcobinamide-phosphate synthase (EC 6.3.1.10)	FIG00000689	ttgatcgaggctcgccagcgcaccagctatctcgtcagccgcgagacggccgccatgaacgaggaacaggtggcacgcgccaccgtcgaatccctgttggagaacggcaacgacgccatcttcggcgcgctgttctggtgtgccgtggccggcgcgccgggcgtgatcctgttccggctcgccaacacgctggacgccatgtggggctaccgcaacgcgcgcttcgaatccttcggcaagatcgcagcgcgcctcgacgatctgctcaatttcatccccgcgcgcctcaccgccctgagctacgccctgcttggccgcacccgcgcggcactggcctgctggcggcgacaggcacccgcgtggtccagccccaacgccgggccagtgatggccgccggc…	MIEARQRTSYLVSRETAAMNEEQVARATVESLLENGNDAIFGALFWCAVAGAPGVILFRLANTLDAMWGYRNARFESFGKIAARLDDLLNFIPARLTALSYALLGRTRAALACWRRQAPAWSSPNAGPVMAAGAGSLGLQLGGAAIYESVTEARPPLGEGAPPHGADIPRALALISRSLWLWLLLIALGEACVHAF
NODE_11_length_137584_cov_6.95087_ID_19	fig|857335.5.peg.178	NODE_11_length_137584_cov_6.95087_ID_19_1489_1181	1489	1181	-	Adenosylcobinamide-phosphate synthase (EC 6.3.1.10)	FIG00000689	atgacgatcaccctggccctgttcctcggcgtgctgctcgaccgcctgttcggcgaactgccgcgctggcatccactggtgggtttcgggcgctgcgcagactggctggaacgacgcctcaatcgtagccgcgcacgcatttcgcgcggcctgctgggctggacgctgctcgtcctgccgccaagcctgctcgcactctgggccgcccgcttgccgcagggctggatcatcgatgccatcgcgctctatttcgcgctgggcgcccgcgcgctcggcgagcatggcgcacaggtcactcgggcactttag	MTITLALFLGVLLDRLFGELPRWHPLVGFGRCADWLERRLNRSRARISRGLLGWTLLVLPPSLLALWAARLPQGWIIDAIALYFALGARALGEHGAQVTRAL
NODE_11_length_137584_cov_6.95087_ID_19	fig|857335.5.peg.179	NODE_11_length_137584_cov_6.95087_ID_19_2820_1486	2820	1486	-	Cobyrinic acid A,C-diamide synthase	FIG00138468	atgagctgtcgcgccttcctcgtcaccgcgccggcctcgggtcaaggcaagaccaccgtcaccgcagcgctggcccgtcaggcgcgcgcgcggggcgagcgggtccgggtattcaagaccggccctgatttcttcgatccgatgattcacgaggtcgccagcggggagtcctgtcatcagctcgaccttttcatgggcggactggcgcattgccaggcgctactcgccgaggccgcccgggaggcgaatctgatcctcgtcgaaggcgtgatgggcctgttcgatggcaagccctcaagcgccgacctcacccgcgccttcaggctgcccatcgtcgccgtcatcgacggcagcgccatggcccagaccttcggcgccttggcccatggcctcgccagt…	MSCRAFLVTAPASGQGKTTVTAALARQARARGERVRVFKTGPDFFDPMIHEVASGESCHQLDLFMGGLAHCQALLAEAAREANLILVEGVMGLFDGKPSSADLTRAFRLPIVAVIDGSAMAQTFGALAHGLASFQPDLEFAGVIANRVASERHAAMLFESLPPQIPGLGWLPREAAITLPERHLGLLPAAELADLESRLDKAATALHFDASQLLDWEGPGDVAQAVGRASARYERPDVGLKPDPRLSALQGQRIAIARDEAFCFIYPANLDTLRALGAELAFFSPLHDATLPACDAVWLPGGYPELHAARIAANEGMQLALLAHASAGKPLLAECDGMMSLFETLVTADGAMHAGFGLLEGGALMQGKLAALGLQEAALPEGSLRGHSFHYSRADTPLV…
NODE_11_length_137584_cov_6.95087_ID_19	fig|857335.5.peg.180	NODE_11_length_137584_cov_6.95087_ID_19_3448_2828	3448	2828	-	Cob(I)alamin adenosyltransferase (EC 2.5.1.17)	FIG00000641	atggaggcaatgaccatgcaagacgctgatcgcgaagcccgccaccaggcgcgcatggcgcgcaagaaagccatcatcgacgcccacatcgccgccgccgatgaagaacgcggcctgctgctgatcaacaccggcaatggcaagggcaagagcagcgcggccttcggtgtgctcgcgcgcgcgctgggccatggcatgaactgcgcggtgatccagttcatcaaaagccgttcggataccggcgaggaagccttcttccgcgatcatccgcgcgtgaaatggcacgtcatgggcgacggcttcacctgggacacgcagaacgacgcccaggaccgtgccaccgcccgcaccgcctgggaacaagccgtcggctatctgcgcgatcccgccatcgacctg…	MEAMTMQDADREARHQARMARKKAIIDAHIAAADEERGLLLINTGNGKGKSSAAFGVLARALGHGMNCAVIQFIKSRSDTGEEAFFRDHPRVKWHVMGDGFTWDTQNDAQDRATARTAWEQAVGYLRDPAIDLLILDEFTYTLKYGWLPLEKVSRELMSRPEMQHVIITGRAAPEGLIEIADTVTTMDLTRHAYHAGVKAMPGIEW
NODE_11_length_137584_cov_6.95087_ID_19	fig|857335.5.peg.181	NODE_11_length_137584_cov_6.95087_ID_19_5392_3533	5392	3533	-	Outer membrane vitamin B12 receptor BtuB	FIG00000912	ttgaatccaatccctctaaagaccctgccggcagctctgctgctggtttttgcccatgcagcggcttctgccgccgaaaccgagctggaaaccatcgtcgtcacggccaaccgtgtcgcgcgtaccgccgatgaaacccttgctgcggttaccgtgatcacgcgcaaggacatcgaacgccagcaggccacatcggttcccgacctcctgcgcggactgcccggcgtacagttttccaacaatggcggccccggcaagagcacttccctgttcctgcgcggcaccaacagcaaccatacgctggtactcatcgacggcgttcgtgtcggctcggccacaacaggcacctacggcctgcaggacctgccgatcgcacagatcgaacgcatcgaaatcgtg…	MNPIPLKTLPAALLLVFAHAAASAAETELETIVVTANRVARTADETLAAVTVITRKDIERQQATSVPDLLRGLPGVQFSNNGGPGKSTSLFLRGTNSNHTLVLIDGVRVGSATTGTYGLQDLPIAQIERIEIVRGPRSSLYGSDAIGGVIQIFTRKGPQPASLSLGAGSRQSFEAAVDGGVGTADLWFNAGVSSSSTRGINVSDTANEPDRDGYTRSDVNVRGGGRLGTSLSYDVQARHLEARNKYDGTPNVSDITQELFTGNLRYDVNERFASSLRLAQNLDATTSLKEERFYSRIDTRRNQASWQNDFTLAAGHQFVTGLDWQYDEVLSNNAYARAKRTNRAVFLEYLGEAGRADIQLSGRHDRNEAFGNHNTGSAAVGFTLSPALRLHTSYGTAFK…
NODE_11_length_137584_cov_6.95087_ID_19	fig|857335.5.peg.182	NODE_11_length_137584_cov_6.95087_ID_19_5789_5992	5789	5992	+	hypothetical protein		atggacgccgagatcaccagcctcgaagaacgcctcaccagcctgcttgccgaatatcgtggcctgcatatggaaaaccgtgaactgaccacgcgggtcgcaactctgcaggccgacaacagccgccttgaggaaaagctcgacgcggtcagtgtgagggtcgaaaacctgctcaagcgcctgccgccggaggatagccagtga	MDAEITSLEERLTSLLAEYRGLHMENRELTTRVATLQADNSRLEEKLDAVSVRVENLLKRLPPEDSQ
NODE_11_length_137584_cov_6.95087_ID_19	fig|857335.5.peg.183	NODE_11_length_137584_cov_6.95087_ID_19_5989_6288	5989	6288	+	hypothetical protein		gtgagtgagacgctgcagctgcagatcatggggcgtgaatatcaggtctccatcaagccggaagagaaggaaaccctgctggctgctgtggagatggtgaatgcgaagctgcagtcgctgacgggcaagacctcatccggcagtgaatccactgccgtgatgtgtgctctgatgatcgcgcatgaagccgtgctgatggaacgcacggcgggcttggacatgccggcctatcgtcgtagaatcgcccgcatggtcgaacagatcgacgaagcttcagccagacaggagaagcttttttag	MSETLQLQIMGREYQVSIKPEEKETLLAAVEMVNAKLQSLTGKTSSGSESTAVMCALMIAHEAVLMERTAGLDMPAYRRRIARMVEQIDEASARQEKLF
NODE_11_length_137584_cov_6.95087_ID_19	fig|857335.5.peg.184	NODE_11_length_137584_cov_6.95087_ID_19_7265_7423	7265	7423	+	hypothetical protein		gtgttccacgcggatatggaactggaacgcgaaggcatggaggctgaactggtgcctcagcgcgaatatgcctctcgcctggaggacgatttgctagggctggatgcaaggactttccaggccgaagtgaccttcatgatgaaaggcgggttgatgtag	MFHADMELEREGMEAELVPQREYASRLEDDLLGLDARTFQAEVTFMMKGGLM
NODE_11_length_137584_cov_6.95087_ID_19	fig|857335.5.peg.185	NODE_11_length_137584_cov_6.95087_ID_19_8296_7532	8296	7532	-	FIG002842: hypothetical protein	FIG00002842	gtggcccgcgtgatcacctacgaatatcctctcagcgaacgcatccgtaccctgctgcggctggaagacctgttcgacaaggtcgtgcatttcacgctcgccgatggagcctacgagcacaacgcagccattcatgcgattttcgaaatccttgaagtcgctggtcgtgcagacctgaaggtagaccttgttcaggaactcgaacgccagcgtcaaatcctgctcggttttcgcgacaatccgcatatctccgaagaagcactggctggtgcgctgtatgagatcgagcaggccagcagcgcgctgctggccatggctggacgcgtaggacaatatctgcgcgattcggagtggctgatggcaatacgctcccgtgcaggtattccgggaggctcctgc…	MARVITYEYPLSERIRTLLRLEDLFDKVVHFTLADGAYEHNAAIHAIFEILEVAGRADLKVDLVQELERQRQILLGFRDNPHISEEALAGALYEIEQASSALLAMAGRVGQYLRDSEWLMAIRSRAGIPGGSCEFDLPSYHYWLNHDSAQRRHDLQTWTSPMFPLRDGLAIILRLLRESGRPEYQLARQGSYQMMMSGRNAQLVRVRVQRDDKVIPEISANRYAFNIRFVFPDTISRPRPAETDVRFELTCCTL
NODE_11_length_137584_cov_6.95087_ID_19	fig|857335.5.peg.186	NODE_11_length_137584_cov_6.95087_ID_19_8970_8296	8970	8296	-	Dephospho-CoA kinase (EC 2.7.1.24)	FIG00000267	atgcagcctgaacgcctgcccgtggtcggtctgaccggcgggatcggcagtggcaagagctccgcctcgcagcatttcaaagcattgggaatcacggtggtcgataccgatgccgtctcccgtcagctcaccggagttggtggagaggccatgtctgccatccgccagaccttcggtatgcacatgcaagaggcggacggcgcactcgatcgcgctgcaatgcgccatctggtcttctccgacccggaagccaggaaacaactggaggccattctgcatccgatgatccgggcccgtgcagaactggagttgcggcaagcctgctctccatacgcgatactggaggttccgctgctggtcgagtcccgccatttcatgcaacgctgcaaccgcatcctg…	MQPERLPVVGLTGGIGSGKSSASQHFKALGITVVDTDAVSRQLTGVGGEAMSAIRQTFGMHMQEADGALDRAAMRHLVFSDPEARKQLEAILHPMIRARAELELRQACSPYAILEVPLLVESRHFMQRCNRILVIDCPPDLQLERVVARSNLSPAEVERIISAQASRPQRLAAASEVIENTGSLEDLKHSVQRMHEFYVLEFTQQKRGCYDAVTKAGHSGGQDR
NODE_11_length_137584_cov_6.95087_ID_19	fig|857335.5.peg.187	NODE_11_length_137584_cov_6.95087_ID_19_9655_8960	9655	8960	-	SPOR pfam05036 Sporulation related domain		atgaaggccttgcgcgttcccttcctcctgttgctgatattcaacgtgatcgcggcactgttcgtcgccctgaatctgttggggcgacgcatgccctgggatgaaccgggcgaaagcgcacgcctcgggcgacagctggcccccgaacagatccgtctggtcacgacacctgctgtacccgcgtcatcccccagggccgctgcaagcgcccctgtagccggcctactgtgcagtatcgtcagcggtctgacccaggatgaagcgcagcaactcgagggacaggcccaagagtatgcacaacgtctggaaatgagcatcagtgctcgcgtcagcggcatctccgcgccctcttactgggtgcacattcctccttccggcggcaaggaaggtgcgacccgg…	MKALRVPFLLLLIFNVIAALFVALNLLGRRMPWDEPGESARLGRQLAPEQIRLVTTPAVPASSPRAAASAPVAGLLCSIVSGLTQDEAQQLEGQAQEYAQRLEMSISARVSGISAPSYWVHIPPSGGKEGATRRAEILTRAGLTDLIIIRDPGPNQFAISLGLFRSEEAARRLFDQLRKRNVINVRLTVRDNTGNNARVELKGPDQILDAMVSDFISTHSHARRSDSCHAA
NODE_11_length_137584_cov_6.95087_ID_19	fig|857335.5.peg.188	NODE_11_length_137584_cov_6.95087_ID_19_10414_9701	10414	9701	-	Pantothenate kinase type III, CoaX-like (EC 2.7.1.33)	FIG00000695	atgtatctgctcatcgatgctggcaacagccggatcaaatacgcctggcacgacagccagcactggcttggccacgacagttgcagcacggaccggccacagctgatgctgccacccaacctgtcggtcacccggatcgtagcctccaatgtcgcaggctcagccgtggcagaagcactgcaaactgagctcacgcctctggcggcccccattgaatggctgaaggcctctgccgaacgctgcggtgtacgctgcgcgtatccggaccccgctcgcctgggggcagatcgctgggcagccgtaattgcggcctggcaccgaacgcgcagcgattgtctggtggtctgtgctggcacggcaaccaccgtggatctcgtacgcgcggatgggcaacacctt…	MYLLIDAGNSRIKYAWHDSQHWLGHDSCSTDRPQLMLPPNLSVTRIVASNVAGSAVAEALQTELTPLAAPIEWLKASAERCGVRCAYPDPARLGADRWAAVIAAWHRTRSDCLVVCAGTATTVDLVRADGQHLGGCILPGLGLMRESLAQSTASLPETGGEFRLPAINTADAIATGCLLAQLGAINAQHQQLSGAAPILLTGGHAPALLPLCGTQASHQPTLILDGLLQVATSELPC
NODE_11_length_137584_cov_6.95087_ID_19	fig|857335.5.peg.189	NODE_11_length_137584_cov_6.95087_ID_19_11212_10418	11212	10418	-	Biotin--protein ligase (EC 6.3.4.9, EC 6.3.4.10, EC 6.3.4.11, EC 6.3.4.15)		atgcccgccccagcagttccccctttcgactatctgctcctgcgcgaaaccttggggagtttcgctccgcgcttcgatgtcgaacatcgccagcaatgtgactccaccaatgcgcagttgctggcgtcccctcgagctgcgggcagtgtattagtctgtgacgagcaactggccggacgggggcgtcggggacgtcgctgggtttccgcgcctggcagcagccttacattttcgctcctctggcgtctaccgcgcgggcgctccgccaccggactcagcctcgccgtcggcgttggcatcgtaagcgcactggaaacgctgggcattgaagggactggcctgaaatggcccaacgacatctggctcaagggacgtaagctgggcggcgtactcatcgaa…	MPAPAVPPFDYLLLRETLGSFAPRFDVEHRQQCDSTNAQLLASPRAAGSVLVCDEQLAGRGRRGRRWVSAPGSSLTFSLLWRLPRGRSATGLSLAVGVGIVSALETLGIEGTGLKWPNDIWLKGRKLGGVLIEALPERSNPGLVIGIGLNLRSSPGWQTEIGRTPASLDETGPVPPRETVLAHLLKTLHVTLETFGLQGFDATQDIWNSHNALRGQQVLISQENTEWQAECGNVDSEGALTLHLPDGSSRHITAGDISLIPLEP
NODE_11_length_137584_cov_6.95087_ID_19	fig|857335.5.peg.190	NODE_11_length_137584_cov_6.95087_ID_19_12718_11297	12718	11297	-	Nitrogen regulation protein NtrC		atgaatgctgtctggatcgtcgacgatgatcgctccatccgctgggtcctggaaaaggcgctcgcccgtgaaaacatcgcccaccgcagcttttcatcggccacagaagccgttgccgtgcttgacgccaatggcgcccctccccaagtcctgatctcggatatccacatgcccggcgaatccgggctggtgctgctacagcgcgtcaaggccaagcaccccagcctgcccgtcatcatcatgacggcctattccgatctggacagtgcggtctcagcattccaggggggcgctttcgagtatctgcccaagcctttcgacgtcgaccaggcgctgaacctgctcaagcgggcactcaaggaaagcgcgccccatgatggtgcagacgaagagtccact…	MNAVWIVDDDRSIRWVLEKALARENIAHRSFSSATEAVAVLDANGAPPQVLISDIHMPGESGLVLLQRVKAKHPSLPVIIMTAYSDLDSAVSAFQGGAFEYLPKPFDVDQALNLLKRALKESAPHDGADEESTSVPEILGHAAAMQEVFRAIGRLSQSIATVMINGESGTGKELVARALHRHSPRREGPFIAINTAAIPRDLLESELFGHERGAFTGAAAQRRGRFEQAEGGTLFLDEIGDMPAELQTRLLRVLSDGHFYRVGGHTPVKANVRVIAATHQNLEQRVRDGLFREDLFHRLNVIRLRLPPLRERREDVPLLAKHFLSHSSQELGVETKRLTEAALKHLQSFDFPGNVRQLENLCHWLTVMAPGQTVDVADLPAELRDAPNQGQNTGAGNSD…
NODE_11_length_137584_cov_6.95087_ID_19	fig|857335.5.peg.191	NODE_11_length_137584_cov_6.95087_ID_19_13775_12762	13775	12762	-	Nitrogen regulation protein NtrB (EC 2.7.13.3)	FIG00002702	ttgctttcatccgccgtggtgatggtcagcgcggaccgctcggtctgctacgtcaacccttcagccgagcacctgttcgccgccagtgcgcgacaatgcctgggccagcatctctcggcactactgggcgatctgccaggcctctgggccgcactggacaatgccctggccaacaactggagctattccggccagaatctcgcggtcaaacgccctggcatccaggcgctgcatctggactgcacggccacgccggtcgatctccctccggcccgtctgctgctggaattccgcccgctggatgcccagctcaaggtggcacgtgaagaacggctggccgagcagcagcaggcgaaccgcgaactggtccgcagtctggctcacgagatcaagaatccg…	MLSSAVVMVSADRSVCYVNPSAEHLFAASARQCLGQHLSALLGDLPGLWAALDNALANNWSYSGQNLAVKRPGIQALHLDCTATPVDLPPARLLLEFRPLDAQLKVAREERLAEQQQANRELVRSLAHEIKNPLGGIRGSAQLLERELDDPQWREYTQVIIAEADRLQDLMNRLLNSHRMMHPSIVNVHDVLERVLRLIQAEFPKIGIRRDYDISLPQLTADREQLIQAVLNIARNAAQALDGAGDIVLRTRAARQVTLAKRRHKLALELQVLDNGPGIPEDIRDKIFYPLISGREGGSGLGLSIAQSFVEQHQGTIELESEPGRTCFTILLPITQA
NODE_11_length_137584_cov_6.95087_ID_19	fig|857335.5.peg.192	NODE_11_length_137584_cov_6.95087_ID_19_14192_13869	14192	13869	-	FIG00538108: hypothetical protein	FIG00974691	atgacccgcgaacagccggtctccacggtatctcccatacgctccagcagcacgccaacgccagccaacttcccgcgggtcgaccagagcacccagaaacgacgcgatgacgatcgcctccgtatcctggaaacggaactcgacagcgaaagcaaacagcttgagaccgcacgcaaggagctgaccgaacaggaaagcgtgcgccttggggacgagcgcaactatcagcgctacctggatcgcatcaagacctacaaggacaaggttgagctgcacgaacgcaacatcgaagccatcaaccgggaaatcagcaagctcagataa	MTREQPVSTVSPIRSSSTPTPANFPRVDQSTQKRRDDDRLRILETELDSESKQLETARKELTEQESVRLGDERNYQRYLDRIKTYKDKVELHERNIEAINREISKLR
NODE_11_length_137584_cov_6.95087_ID_19	fig|857335.5.peg.193	NODE_11_length_137584_cov_6.95087_ID_19_14253_14390	14253	14390	+	hypothetical protein		ttggtcatcgacgcatttgtagatgtctgcgtgagcaatgcccggggcaaggaggccggcgcacgccaacagcagcgatgcgtgaaggaagcggggcatggtgtggatcctgaaggcttcaagcgtggggcagtttag	MVIDAFVDVCVSNARGKEAGARQQQRCVKEAGHGVDPEGFKRGAV
NODE_11_length_137584_cov_6.95087_ID_19	fig|857335.5.peg.194	NODE_11_length_137584_cov_6.95087_ID_19_15907_14498	15907	14498	-	Glutamine synthetase type I (EC 6.3.1.2)	FIG00134889	atgacccctcaagacgtaatcaagctgatcaaggaaagcgacgcgaagttcgtggacctgcgcttcaccgatacccgtggcaaggaacagcacgtgaccgtgccctcgcacgtggtcgacgaagagtggttcgagcgtggtcacgcctttgacggctcctccatcgcaggctggaagggtatccaggcctccgacatgctgctcgctccggacgccagcaccgccaaggttgatcctttcttcgacgaaaccaccgtcttcatcacctgtgacgtcatcgagccgtccgacggcaagggttacgaccgcgacccgcgctccatcgccaagcgcgccgaagcctatctgaagtcctccggcctgggcgacaccgccttctttggcccggaacccgaattc…	MTPQDVIKLIKESDAKFVDLRFTDTRGKEQHVTVPSHVVDEEWFERGHAFDGSSIAGWKGIQASDMLLAPDASTAKVDPFFDETTVFITCDVIEPSDGKGYDRDPRSIAKRAEAYLKSSGLGDTAFFGPEPEFFIFDGVSWSADISGCFVKIKSDEGAWATAEDQDGNNIGHRPTVKGGYFPVPPVDSHQDIRASMVLILEELGIPVEVFHHEVATAGQNEIGTKFSTLVQRADWTQTLKYVVHNVAHQYGKTATFMPKPIVGDNGSGMHVHQSVWKDGKNLFAGNGYAGLSEFALYYIGGIIKHAKALNAITNPGTNSYKRLVPHFEAPVKLAYSARNRSASIRIPHVSSDKARRIETRFPDPLANPYLAFSALLMAGLDGVQNKIHPGEAADKNLYD…
NODE_11_length_137584_cov_6.95087_ID_19	fig|857335.5.peg.195	NODE_11_length_137584_cov_6.95087_ID_19_16397_16855	16397	16855	+	Rhodanese-related sulfurtransferase	FIG00432062	atggaatccgtatccctgagcgatctgcttggccttgctgccgcacgggcggaaaagatggatctgacctacgctggcgccctgactccaaaggaggctgccgccgtgctgaagcttgcgccctcggcgcgcctggtggatatccgtacgcgcgccgaactggattgggtcgggcgtattccagggtctgtcgagatcgaatggaacagctatccgggcagcattcccaatcctcatttcctgacccagctgaagcgggaaatcgatccggaagccttgttgctgttcatctgtcgctcaggggcgcgttcgcacaatgccgcgatggccgccgccgctgccgggctgggcaacagctataacgtgctggagggcttcgaaggcgacaaggatgccagt…	MESVSLSDLLGLAAARAEKMDLTYAGALTPKEAAAVLKLAPSARLVDIRTRAELDWVGRIPGSVEIEWNSYPGSIPNPHFLTQLKREIDPEALLLFICRSGARSHNAAMAAAAAGLGNSYNVLEGFEGDKDASGQRGKVGGWRHAGLPWSQS
NODE_11_length_137584_cov_6.95087_ID_19	fig|857335.5.peg.196	NODE_11_length_137584_cov_6.95087_ID_19_16937_18037	16937	18037	+	Quinolinate synthetase (EC 2.5.1.72)	FIG00000463	atgcagacttccccgatcgccttcgaccctttcaacgccctcaaggatgccgaggcgcatgagcgcatccgcgccgccaaggaaaagctgggcaagcgtgtcgtgctgctggtgcaccactatcagcgtgccgatgtctaccagcatcgcgatctcaccggcgactcgttgaagctttcgcgcctggctggcgagaccgatgccgaattcatcgtgttctgcggtgtgcatttcatggccgaggtggcagacatcctctccaagccggagcagatatccatcctgcccgatctggctgcgggctgttcgatggccgatatggccaacctggccaaggtcgagcgctgctggcgcgaactgcgcgaagtgctgggcacaccggatgagcttgtgacgccg…	MQTSPIAFDPFNALKDAEAHERIRAAKEKLGKRVVLLVHHYQRADVYQHRDLTGDSLKLSRLAGETDAEFIVFCGVHFMAEVADILSKPEQISILPDLAAGCSMADMANLAKVERCWRELREVLGTPDELVTPVTYINSAADLKAFCGEHGGIVCTSSNAPKILEWSFAQREKILFFPDQHLGRWSGYKMGIPLEDMVVWDPDQPYGGLTPELIRKARMLLWKGHCSVHQMFQPAHISQWRQEHPEGIVISHPESAFEVCLNSDYVGSTEYILKVVKEAAPGTQWLVGTELNLVSRLAEKVKHEGKLVQFMSPMVCMCSTMQRIDPQHLAWTLENLVAGNVVNRITVPAHEAGMARLSLERMLAVS
NODE_11_length_137584_cov_6.95087_ID_19	fig|857335.5.peg.197	NODE_11_length_137584_cov_6.95087_ID_19_18055_18801	18055	18801	+	Endonuclease/Exonuclease/phosphatase family protein	FIG00959676	atggcaaacagcctgcgtatctgcagttacaacattcacaagggtttctcgcagctcaatcgtcgcatgatgatccacgagctgcgcgaatgcctgcgccagctcgaccccgacatcacgctgctgcaggaggtgcagggtctgcatctgcatcacgcgcagcgccatagcgactggccggactctccgcagcatgagtttctcgccggcgagcggctgcatgcggcctatggcgtcaatgccgcctacgaccatgggcaccatggcaacgccgtgttgtcgcgttatccgatccagcgcgcgcgcaatcaggatgtcagccagtcccggctggagcagcggggcattctgcattgcgaactggccatggcgggcggacgagaggtgcattgcctgtgc…	MANSLRICSYNIHKGFSQLNRRMMIHELRECLRQLDPDITLLQEVQGLHLHHAQRHSDWPDSPQHEFLAGERLHAAYGVNAAYDHGHHGNAVLSRYPIQRARNQDVSQSRLEQRGILHCELAMAGGREVHCLCVHLSLTEAQRRRQLVMLADYVQTHVPARAPLVIAGDFNDWRTRANDWLARQLGLVEAFSALHGQSARSFPSSLPVLRLDRIYVRGMRPISARVLWGRPWASISDHAPLLTELRLT
NODE_11_length_137584_cov_6.95087_ID_19	fig|857335.5.peg.198	NODE_11_length_137584_cov_6.95087_ID_19_18798_19958	18798	19958	+	Cardiolipin synthetase (EC 2.7.8.-)	FIG00052605	atgagcgggccgcgtccgggcaaccagatccagctgcttcacagcggcggcgagtatttcccggccttgctggcggccattgcgggcgcgcgggaggaaatcctgcttgaaacctacatcttcaagccggatgcggttggccgggaggtggcggctgcgcttagtgccgccgtgctgcgcggagtacgagtgcgcctgatagtggatggcttcggcgggcgtgatttcgtgcaggaactgatggacgatctggccgcggacggagtcgaggtgatgatcttccggcgtgaactcaagcccttgctggcccgtcgttaccgactgcgccgcctgcatcgcaagctggccgtggtggatgcgcgcatcgccttcgtgggtggcatcaatatcatcgatgat…	MSGPRPGNQIQLLHSGGEYFPALLAAIAGAREEILLETYIFKPDAVGREVAAALSAAVLRGVRVRLIVDGFGGRDFVQELMDDLAADGVEVMIFRRELKPLLARRYRLRRLHRKLAVVDARIAFVGGINIIDDFEPVGPRHPRFDFAVRIEGPVVTDVHRAMARLWRLVLWASLKRRFVPLRWALPEGVRSGSMRARLVLRDNLRHRRDIEEAYLDAIEHAQTRILLANAYFFPGRVFRQALMAAAGRGVQVTLLLQGRVEYWLLHHACRALYPPLLTAGVRIVEYRKSFLHAKVAVVDTGWATVGSSNIDPFSLLLAREANVVILDETFATGLAAALQAACTDGGVEVSLADWQRQRWWHRATAWLAYGILRLLLGVAGYASRLK
NODE_11_length_137584_cov_6.95087_ID_19	fig|857335.5.peg.199	NODE_11_length_137584_cov_6.95087_ID_19_20043_21161	20043	21161	+	3,4-dihydroxy-2-butanone 4-phosphate synthase (EC 4.1.99.12) / GTP cyclohydrolase II (EC 3.5.4.25)	FIG00036306	atgaaaacacccgaagacagctgtctgtcacccatccgcgacatcattgaggatatccgtgccggccgtatggtcatcctcatcgacgatgaggaccgcgagaacgaaggtgacgtcgtcatcgccgcgcagcacatcacgcctgaagccatcaatttcatggccaggcacgcacgtgggctgatctgtctcaccctgaccgaggatcgttgccgtcagctgggcctgaatcccatggcgcgcgacaaccgcagccagttcaccaccgccttcacggtctccatcgaggctgccgaaggtgtcaccaccggcatttccgccgccgatcgcgcacgcaccgtgcaggccgccgtggcacgcaacgccaccccggccgacatcgtgcagcccgggcacatc…	MKTPEDSCLSPIRDIIEDIRAGRMVILIDDEDRENEGDVVIAAQHITPEAINFMARHARGLICLTLTEDRCRQLGLNPMARDNRSQFTTAFTVSIEAAEGVTTGISAADRARTVQAAVARNATPADIVQPGHIFPIQARSGGVLVRAGHTEAGCDLAGLAGLEPAAVICEVMNEDGSMSRLPDLIPFAQQHGLKIGAIRDLIHYRAAVETLIERVADKAVQTAHGEFQLAAFTDRTSGELHLAMYLGEIKPEVETLVRVHEPVSVLDFLDPDSSRHSFSIDQSLSRIAKNGHGVLILLRRPESSNEMLSALGVRKDPLPPAAKWDPRLFGIGAQILRDLGVGKMRVMAPARRIPSMTGFGLEVTGHEKPGTA
NODE_11_length_137584_cov_6.95087_ID_19	fig|857335.5.peg.200	NODE_11_length_137584_cov_6.95087_ID_19_21304_21777	21304	21777	+	6,7-dimethyl-8-ribityllumazine synthase (EC 2.5.1.78)	FIG00000231	atgtcccgattcgaaaacatcatcgagatccatcaggatctgcgcggcaaggatctgcgcatcgccatcgtcgtcggccgcttcaatgccgtcgttggcgaaggtctgcttggcgcaagcatcgccgagctgctcaagcgtgaagtcgctcccgagaacatcctcgtcgccaaggtgccgggggcgttggaaatgccgttgacgctgcgcacgctggccgaaagtggccgctacgatgccttgatcgcactgggggccgtgatccgtggtgacacttatcatttcgaggtggtctccaacgaaatggcgtccggcatcacgcgtgtgcaactggataccggtgtgcctatcgccaatggcgttttgaccaccaataccgatgaacaggccgaagtgcgc…	MSRFENIIEIHQDLRGKDLRIAIVVGRFNAVVGEGLLGASIAELLKREVAPENILVAKVPGALEMPLTLRTLAESGRYDALIALGAVIRGDTYHFEVVSNEMASGITRVQLDTGVPIANGVLTTNTDEQAEVRMGVKGRECAECAIEMANLLRTLRA
NODE_11_length_137584_cov_6.95087_ID_19	fig|857335.5.peg.201	NODE_11_length_137584_cov_6.95087_ID_19_21774_22238	21774	22238	+	Transcription termination protein NusB	FIG00016836	atgagcgaagccaagaagagtgcccgccgcctggcacgcgaagtcgcgttgcaaggcttgtacgaatggcgcatgagcggcaactcgctgcccatgatcgaggaccacctggcgcaggaatgcgaggcctgggggcgtgcggatcgaccattggcactggtgctgctgcgtggcgccagtggcaatgccgatacgctggaggctgcgctgtccggttgtctggaccggccggccgaggaactctccccggtcgagcgcgcgatcctgctgctgggcgcctatgaactcacgcatcgtatcgaaacgccctaccgagtcgtgatcaacgaggccatcgaactggccaaggattttggcggtaccgatgggcatcgctacatcaatggcgtgctcgacaag…	MSEAKKSARRLAREVALQGLYEWRMSGNSLPMIEDHLAQECEAWGRADRPLALVLLRGASGNADTLEAALSGCLDRPAEELSPVERAILLLGAYELTHRIETPYRVVINEAIELAKDFGGTDGHRYINGVLDKFAPQVRAAEVEHAAKQRKTRD
NODE_11_length_137584_cov_6.95087_ID_19	fig|857335.5.peg.202	NODE_11_length_137584_cov_6.95087_ID_19_22246_23205	22246	23205	+	Thiamine-monophosphate kinase (EC 2.7.4.16)	FIG00000570	atggccggcgaattcgatctgatccggcgttatttcaactaccccaccagccacaccgagctgggcgtgggggacgatggcgcgctgtgcgtgccgcgtccagggatgcagcttgtggtgtcgaccgacatgctggtggccggcacgcatttcctgcccgaagccgatccgggcctgctgggctggaaggctgccgccgtgaacgtatcggacatggcggcgatgggtgctgagccgcgctggatcacgctggcgatctcgttgccggctgtcgatgagtcctgggtcgcggcgttcgcacgcggttttcgcgattgctgcgaggcttatggtgttgactggatcggtggcgacaccacgcgtgggccattgaatctcgcgcctaccgttttcggcgaa…	MAGEFDLIRRYFNYPTSHTELGVGDDGALCVPRPGMQLVVSTDMLVAGTHFLPEADPGLLGWKAAAVNVSDMAAMGAEPRWITLAISLPAVDESWVAAFARGFRDCCEAYGVDWIGGDTTRGPLNLAPTVFGEVPAGRAIRRDGARHGDDVWISGWPGMAALGLAQVLGELQLVGAWGESCLERLHRPMPRVALGCALRGTASAMLDVSDGLLGDLAHILERSAVGAVLDEPALPLECLLAACRRTERATAALLSGGDDYELLFTAPRERRGQVEAIGRHCELPLHRIGRILDKPGLWLQRGDGVCEALPGRGYEHFRN
NODE_11_length_137584_cov_6.95087_ID_19	fig|857335.5.peg.203	NODE_11_length_137584_cov_6.95087_ID_19_23205_23693	23205	23693	+	Phosphatidylglycerophosphatase A (EC 3.1.3.27)	FIG00000982	atgcgtccgactgtctctctgctcttctcccatccggcccatttcatctcgcttggctttggctcagggctggcacccaaggcgccgggcaccgtgggcagtttcgtggcctggggcatctgggccctggtcttcgcctggctgccttggccctcagaatgggcgctgacggctttcctcgtgctggcattcctgctggggtctgtgtgcatcgcacggactggagccgccttgggcgaggtggatcatggcggtatcgtatgggatgagtttgtcgccgtctggctggtgctggcctgcctgcctgccaccttcgtctggcaactggctggcgtgctggtgttccgcgtcttcgatatcgccaaaccctggcccatccggcaggcggacgctcgtttc…	MRPTVSLLFSHPAHFISLGFGSGLAPKAPGTVGSFVAWGIWALVFAWLPWPSEWALTAFLVLAFLLGSVCIARTGAALGEVDHGGIVWDEFVAVWLVLACLPATFVWQLAGVLVFRVFDIAKPWPIRQADARFKNGLGVMFDDVLAAGYTLLILLPLRNWLA
NODE_11_length_137584_cov_6.95087_ID_19	fig|857335.5.peg.204	NODE_11_length_137584_cov_6.95087_ID_19_23690_24268	23690	24268	+	Hydrolase (HAD superfamily)		atgagcccgcaaggattgctggatttcctgctgacgctggatggcctgaaggccgtggagcggcgcagctatccctccgggatgtcgcggccggagaacagtgccgaacacagttggcactgcgcgttggcggcgttgctgcttgagggtgagtgtgcgttcgtcgtggatgcacgtcatgccgcactgctcatgctgatgcacgatgtgccggagatcgcctgtggtgacaccttcgtctacgccagcgaacgagccgacgctgaagtccgcgagcgtgtcgccctggaggggctgttggcaccgttggcgaatgccgatgcgcagcgcctgcgggcgctgtgggaagaattcaccgccagccagaccccggaagcgcgctatgcgaatgcgctcgat…	MSPQGLLDFLLTLDGLKAVERRSYPSGMSRPENSAEHSWHCALAALLLEGECAFVVDARHAALLMLMHDVPEIACGDTFVYASERADAEVRERVALEGLLAPLANADAQRLRALWEEFTASQTPEARYANALDRLLPVLHNLSHRGRSWRENGVQLSQVLGRLELVAEVFPTIWSILRSSVEQCFQELQHDT
NODE_11_length_137584_cov_6.95087_ID_19	fig|857335.5.peg.205	NODE_11_length_137584_cov_6.95087_ID_19_24258_24746	24258	24746	+	C-terminal domain of CinA type S; Protein Implicated in DNA repair function with RecA and MutS		atgacacctgaccttatttccctggctacccgtgtcggtgaggcattgatgagccgccactggcagttgggaacggcggagtcctgtaccggcggtctggtcagtgccctggtgacggaggttgccggttccagcgcctggttcgaccggggaatcgtgagctattccaatgaagccaaggtggagctgcttggcgtttcgccactgacgctgcatgcgcacggcgccgtcagcgaacagacggtacgcgagatgttgtctggcgttcttgcccgttcatccgcacaggtggccgtggcggtctctggcattgccgggccgggcggtggcacggcggagaaacccgtgggcacggtgtgtttcggctggcagcggcgtggcgtggaagccgtatgcgaa…	MTPDLISLATRVGEALMSRHWQLGTAESCTGGLVSALVTEVAGSSAWFDRGIVSYSNEAKVELLGVSPLTLHAHGAVSEQTVREMLSGVLARSSAQVAVAVSGIAGPGGGTAEKPVGTVCFGWQRRGVEAVCETLLLPGSRAEVRRAAAQIALAGVLRHALD
NODE_11_length_137584_cov_6.95087_ID_19	fig|857335.5.peg.206	NODE_11_length_137584_cov_6.95087_ID_19_25678_24743	25678	24743	-	Metal transporter, ZIP family	FIG01321637	atgaatcagccggcgtccgccaccgctaccttgccctggcgccaggcgtggctggcgcaggcccgccagcacccctggagtgcggcagggctgatcgcggcattgttggtcatcctctggctgctggctcacagcctgcttgccatcgcagacggtacggccgcgcgtggcctgcgcgaaggcctgcttgccggcctggctggctttgccgccacggcactgggcgctctgggcggcctgttcctgcagaagctgagtgcccgcgccgaagacagcatgctcggttttgccgccggcatgatgctggcggccagctctttctcgctgatcctgcctggcatcgaagcagcagaaggcatcaccgggtcaggcgttctgggggcactggtggtgctcggt…	MNQPASATATLPWRQAWLAQARQHPWSAAGLIAALLVILWLLAHSLLAIADGTAARGLREGLLAGLAGFAATALGALGGLFLQKLSARAEDSMLGFAAGMMLAASSFSLILPGIEAAEGITGSGVLGALVVLGGLALGVALMLGMDQFTPHEHENVGPCGPGSERINRVWLFVMAITLHNLPEGMAMGVSFSQGDLSVGLPLSSAIAIQDIPEGLAVVMALRAAGMNTRNAILMAMGSGLMEPLGALLGVGLASGFALAYPIGLGLAAGAMIFVVSHEVIPETHRNGHQTYATLGLMAGFGLMMVLDTALG
NODE_11_length_137584_cov_6.95087_ID_19	fig|857335.5.peg.207	NODE_11_length_137584_cov_6.95087_ID_19_28244_25689	28244	25689	-	DNA topoisomerase III (EC 5.99.1.2)	FIG00000578	atgagcaaacaactgatcattgccgaaaaaccctccgtcgcgcaggacattgcccgcgcgctgggcggctttacccgccagggcgactatttcgagagcgacgactacgtgctctcctcggcggttggccacctgctggagctggcggtcccggacgaattcgaggtcaagcgcggcaaatggagctttgcccacctgcccacgatccctccccacttcaagctcaacccgatcgagaagagcgcggaacgcctgcgcctgctcactcggctcatcaagcgcaaggacgtgaccggcctgatcaacgcctgcgacgcgggacgcgaaggcgaattgatcttcacctatgtggcccagcacgctggcaccagcaagcccattcagcgcttgtggctgcaa…	MSKQLIIAEKPSVAQDIARALGGFTRQGDYFESDDYVLSSAVGHLLELAVPDEFEVKRGKWSFAHLPTIPPHFKLNPIEKSAERLRLLTRLIKRKDVTGLINACDAGREGELIFTYVAQHAGTSKPIQRLWLQSMTPQAIRDGFLRLRSANDMSGLREAAMCRAESDWLIGINGTRAMTAFNSKSGGFHLTTVGRVQTPTLALVVEREERIRKFKSRDYWEVEARFGVSAGEYAGRWFDEAFRKPEDDEHAAAPRIWDKARAEAILAKCAGKPGKVEEESKPSTQLSPLLFDLTSLQREANGRFGFSARTTLQLAQALYEKHKVLTYPRTDSRALPEDYLLTVSGILGALPDEYAGFSAQILKRGWVKPNKRIFNNAKISDHFAIVPTGTVPKSLSEAE…
NODE_11_length_137584_cov_6.95087_ID_19	fig|857335.5.peg.208	NODE_11_length_137584_cov_6.95087_ID_19_28847_28359	28847	28359	-	Protein of unknown function Smg	FIG00001493	atgatcgacatcctggtgtatctgttcgaaacctacggttacgcggatgcctgccctgaagaacccgaacagctcacgcgcaagctgtccgcagccggatttgcgtcggaggatatcgccgaagccatcgactggctgcgcggtctgcgtctcgcagcacgtgcagagggcgtcgaacaacgcgcagacaagcaatccatgcgcatcctcagtgaacatgaagcctcgcgcctggacctcgcgagccgcggattcctttgctttctggagcacaccggcgtgctggaccaacgccgccgcgaactggtgatcgaacgtgcgatggcaatgcccgaaactgaagtggatctttccagtctcaaagtgatcgtgctgatggtgctgtggcaggaacgcgcc…	MIDILVYLFETYGYADACPEEPEQLTRKLSAAGFASEDIAEAIDWLRGLRLAARAEGVEQRADKQSMRILSEHEASRLDLASRGFLCFLEHTGVLDQRRRELVIERAMAMPETEVDLSSLKVIVLMVLWQERASVDSLILEELLSDECEEEDAYDRESITLH
NODE_11_length_137584_cov_6.95087_ID_19	fig|857335.5.peg.209	NODE_11_length_137584_cov_6.95087_ID_19_29968_28886	29968	28886	-	Rossmann fold nucleotide-binding protein Smf possibly involved in DNA uptake	FIG00035268	ttgacgccaggggacgacctccgccactggctgcgcttgtgtctggttccgggaatcggcccggaacgacagtgtgccctgctggccaacttcggactgcccgagcggatcttcgccgccgggcagtttgctttggcaaaagtgatcggtgaccgcctcgcccgaacgctactcgaccatgacaatcaggcggccatcgagcaggcattagcctgggccgccgaacccggcaacaccatcctcacactggctgatgccacctacccaaaaaatctgctgcaaacagctgaccctcccagcctgatctatctcaaggggcgtcttgagttgctggaagcgcccgcactggccattgtcggtgcacgcaacgcaacgccacaggggctcgcaaatgcggaa…	MTPGDDLRHWLRLCLVPGIGPERQCALLANFGLPERIFAAGQFALAKVIGDRLARTLLDHDNQAAIEQALAWAAEPGNTILTLADATYPKNLLQTADPPSLIYLKGRLELLEAPALAIVGARNATPQGLANAEAFAETFANAGLTVISGLALGIDGAAHQGALRGKASSIAVIGTGANRIYPPRNAELARELAGKGLILSEFPLDTPPTTHNFPRRNRLISGLARGVLVVEAAVDSGSLITARLAAEQGREVFAIPGSIHSPLSRGCHRLIKQGAKLVESAADVLEELHWQSTVVPTPPAPSPPAGYNGVLDAMGHDPVNLDALQVRTGLTPDALFAMLTVLELDGRIASLPGGRFQRIN
NODE_11_length_137584_cov_6.95087_ID_19	fig|857335.5.peg.210	NODE_11_length_137584_cov_6.95087_ID_19_31152_29974	31152	29974	-	Uncharacterized protein with LysM domain, COG1652	FIG00054094	atgtctgcagggtcggcgcctggcttgcgccgcgacaggtcgacggatgtgcagtccatcccggaagtggagtctaccgggctttcagacgggcgcaaccgggccgcgatacaaccacgcatggggctcacaatgctcaaacgaactcttgtcgggcttttctgcgccgcagtggcagcttcctccattgcagccgatgaatccaccccggcgcaactggcggacaacgcgccggatacctacgtcgtcaaacgcggagataccctctggggcatctccggcatgttcctcaaacagccttggcgctggccggaagtctggcgcatgaatcaggaacagatccgcaacccgcacttgatctatcccggccagatcgtggtgttggatcgcaatggcccg…	MSAGSAPGLRRDRSTDVQSIPEVESTGLSDGRNRAAIQPRMGLTMLKRTLVGLFCAAVAASSIAADESTPAQLADNAPDTYVVKRGDTLWGISGMFLKQPWRWPEVWRMNQEQIRNPHLIYPGQIVVLDRNGPTLSLGRNLGPNNTIKLSPQVYSTPANSPITSVPLDAIRSFLVEPLVTEDEDLPGQPTVIAIQEERVLAGTGDIIYGQNLLPESPAWDIYRRGKPIVDPVGQQVLGYEAQFVATAQVSQPERDGKAAELKVIAAKQEIISGDRMMPAAKSELLAAPPHSPAKGLQTAVASIYGGVGVGGRNSVIVLAGGHNIGLEPGHVLALSRAGGTTIYRGDGRAQEIALPDTPLGLAYVFRTFNRVSYALVMEANGPVRTGDKAAAP
NODE_11_length_137584_cov_6.95087_ID_19	fig|857335.5.peg.211	NODE_11_length_137584_cov_6.95087_ID_19_31261_31716	31261	31716	+	Peptide deformylase (EC 3.5.1.88)	FIG00000017	gtggccaaatcggtggctgttgtggacgaccgtatccgccagttgatcgatgacatggcggagaccatgtatgccgccccgggcatcggcctggcggccactcaggtcaatatccatgagcgcgtcatcgtcattgacgtcagtgaggacaagagcggtctgctggccctgatcaatcccgaaatcctcgcacgcgacggcgagcaggtttgcgaggaaggctgcctctctgttcctggggtttatgacaaggtcacgcgtgccgaacatgtgaaggtgcgcgcactcgatcgcgacgggaaatccttccaattcgatgccactggtctgctggcggtctgcgtgcagcacgagatcgaccatctggatggcaaggtgttcgtcgaatacctctcgcct…	MAKSVAVVDDRIRQLIDDMAETMYAAPGIGLAATQVNIHERVIVIDVSEDKSGLLALINPEILARDGEQVCEEGCLSVPGVYDKVTRAEHVKVRALDRDGKSFQFDATGLLAVCVQHEIDHLDGKVFVEYLSPLKQNRIKTKLAKKARITA
NODE_11_length_137584_cov_6.95087_ID_19	fig|857335.5.peg.212	NODE_11_length_137584_cov_6.95087_ID_19_31783_32718	31783	32718	+	Methionyl-tRNA formyltransferase (EC 2.1.2.9)	FIG00000112	atgaaagtagccttcgccggaactcccgaatttgctgcagtggctctgcgcgccattctggcggcagggtttgatgtaccgctcgttctgacgcagccggatcgtcctgccgggcgtggcatgcagttgcagccctccgccgtgaaacaggtggctttggcaaatggcattgcggtcgaccagccggatcgtctgcgtacctcagaacaacaggcggttctggctgactgtgcgccggatgtgctggttgtggctgcctatggcctgatcctggcgcaggctgtgctggacctgcctcgctttggctgcctcaatattcacggatcgttattgccgcgttggcgtggggccgcgccgatccaccgcgccatcgaggcgggcgacgaagagacgggcatc…	MKVAFAGTPEFAAVALRAILAAGFDVPLVLTQPDRPAGRGMQLQPSAVKQVALANGIAVDQPDRLRTSEQQAVLADCAPDVLVVAAYGLILAQAVLDLPRFGCLNIHGSLLPRWRGAAPIHRAIEAGDEETGITLMQMEAGLDTGPMLLKRALPILPIDTTGTLQDKLAVLGGEMIVEALHALENGPLPATIQPEQGVTYAHKIDKAESQLDFRQPAAVLARKLRAFDPFPGGAATIGGTTLKLWAGKVGQGEGDAGTVLAADASGVLVACGDAALRLTVLQKPGSKRLPVGEFLRGFPLSPGLCFDLPGD
NODE_11_length_137584_cov_6.95087_ID_19	fig|857335.5.peg.213	NODE_11_length_137584_cov_6.95087_ID_19_32792_33634	32792	33634	+	Peptidase M48, Ste24p precursor	FIG00996554	atgttcaactggctcaagacttcgatactcatggcgggcatcgtggccttgttcggcgcggtcggtggaatgatcggcggccagcagggcatgatcctcgcactggtttttggcggtgcgatgaacgtgttctcgtactggttctccgacaagatggtgctgcgcatgtacaacgcgcgcgaagtcgatgcggccagttcgccctatctgtacaacatggtgcgtgagcttgccgcccgggcgcagatgccgatgccgcgtgtctacatcattgatgaagcccaacccaatgccttcgccaccggccgtaatcccgagaatgccgctgtggccgccaccagtggcatcctgcgcatgctctccgagcgtgagctgcgcggcgtgatggcacacgagctg…	MFNWLKTSILMAGIVALFGAVGGMIGGQQGMILALVFGGAMNVFSYWFSDKMVLRMYNAREVDAASSPYLYNMVRELAARAQMPMPRVYIIDEAQPNAFATGRNPENAAVAATSGILRMLSERELRGVMAHELAHVKHRDILISTISATMAGAISALANFAMFFGGRDSEGRSNPIATIAVAILAPLAAMLIQMAISRAREFEADRGGAEISGDPDALADALQKIDHYARGIPMAAAEAHPETGQMMIMNPLSGRGVAGLFATHPATEERIRRLRAMRRR
NODE_11_length_137584_cov_6.95087_ID_19	fig|857335.5.peg.214	NODE_11_length_137584_cov_6.95087_ID_19_34325_33846	34325	33846	-	Chemotaxis response regulator protein-glutamate methylesterase CheB (EC 3.1.1.61)	FIG00017306	atggtgcagcacatgccgcccggcttttcgcgcagattcgccgagcgcctcaatgaagacctgcgactggaggtacgcgaggccgaaaatggccagcgtgtggagcccggcctggcactgctggcagcagccggccggcagatgcgcctgaagccgcagggggatggctacgcggtggaggtgatcgacgggccgataatcaaccaccataagccctcggtcgattgccttttcagctccgtggcaaaagtggccggcaccaatgccattggcgtaatcatgaccggcatgggtgacgacggagcgctgggcatgaaggagatgttcgacacaggtgccgtgacgatcgccgaagcggaagaaagctgtgtcgtcttcggtatgcccaagatggccatc…	MVQHMPPGFSRRFAERLNEDLRLEVREAENGQRVEPGLALLAAAGRQMRLKPQGDGYAVEVIDGPIINHHKPSVDCLFSSVAKVAGTNAIGVIMTGMGDDGALGMKEMFDTGAVTIAEAEESCVVFGMPKMAIQRGGVREILPLHQIATRILRWVDSGR
NODE_11_length_137584_cov_6.95087_ID_19	fig|857335.5.peg.215	NODE_11_length_137584_cov_6.95087_ID_19_34913_34467	34913	34467	-	Chemotaxis response regulator protein-glutamate methylesterase CheB (EC 3.1.1.61)	FIG00017306	atgagcgcaccgatcaaggttctgatcgtcgatgattcgatcctggtgcgcgaagctgcacgcagcctgctcgagcgccagccgggcatccgcgtcctggataccgccatcgatccgcttcacacgatggaaaagatgcgtcgtgaatggcccgacgtgatcgtgctggacatccagatgccgcgcatggacggtttgagcttcctgcgcaagatcatggccgagcgccccactccgatagtgatctgctcctcgctggtgggcaacggcgcccagacgggcgtggaggcactgacagccggtgccgtgagcctgatttccaaacccagggcaggcgtcgcggcattcttcgagaacgaaagcgacagtatcgtcgcagccgtacgcgcagccgcccag…	MSAPIKVLIVDDSILVREAARSLLERQPGIRVLDTAIDPLHTMEKMRREWPDVIVLDIQMPRMDGLSFLRKIMAERPTPIVICSSLVGNGAQTGVEALTAGAVSLISKPRAGVAAFFENESDSIVAAVRAAAQANMRRLSELANRTPV
NODE_11_length_137584_cov_6.95087_ID_19	fig|857335.5.peg.216	NODE_11_length_137584_cov_6.95087_ID_19_36577_34910	36577	34910	-	Signal transduction histidine kinase CheA (EC 2.7.3.-)	FIG00000571	atgaaccctggcgaatccgcccagcttgaatggttgcccctcttcgtggcggaaagcaagctgctgctggacagtctggaagccagactgctcgaactggaacatcagccgcagacacgcgaaacactggacgcgatcttccgcgcagcccacagcctcaagggcaatgccacagtggcaagacagatcgaaatcgaatggcttgtccacgtgatggaaagcgtcctcacccgcctgcgcaatggcgaattgcgagtggacggcgggctggtatccgcactgctggcctgttgcgaccatctgcgctttctcgtcaaccaggcgcaccagccggacacaggcagcccgatctttgccaatgccgaccggactcaactgatcggtctgctggtcccctat…	MNPGESAQLEWLPLFVAESKLLLDSLEARLLELEHQPQTRETLDAIFRAAHSLKGNATVARQIEIEWLVHVMESVLTRLRNGELRVDGGLVSALLACCDHLRFLVNQAHQPDTGSPIFANADRTQLIGLLVPYLDVPPDPAPLPATGAGQCWQIRVSFGSDALRRGLDPLNFLHHLETLGRICTLRTCTERLPEEDFDPESCYLGFEILLDSKADKQALEDAFAFASEVCELSILPPAQLTGRYRERLESLPDDDLQTGEMLVRVGAITPAELAASLRRQRAGATVPLGGLLVAEGYINADVVEAALARQAQARQIRSRNFELLHLPRSRIESLQQTLTALRTGLAEAVPDLAQLRAMADVLQEQARALQETRYSEHLHRLHRIVRDASYALGKQTELL…
NODE_11_length_137584_cov_6.95087_ID_19	fig|857335.5.peg.217	NODE_11_length_137584_cov_6.95087_ID_19_37738_36965	37738	36965	-	hypothetical protein		gtgatcggcggcacaggccattgcccacaaaccgccgtacagcggcaccggcgtgaaaaagggcgtgacgagggtgaatacctcgcgcaggctggccagcagcgcccgtatctgcgccggctgccccagcggcaatcccagttgcatgcagagcgcgccatcggccctcagcaacgctttgccggcggcgaacgcctcacggcggaacagcgatgccgccgaggtatcaggatcggtcaggtcatacaccagcagatcaaagcgctcatctgccacagccagctgctccagcgtgacagccgcatcgccaagcttcacgctgacacgcggatcgtccagcgccccctgatgcagcgacggcagatactcgcgggtcaagtcgatcacggcagcatccag…	MIGGTGHCPQTAVQRHRREKGRDEGEYLAQAGQQRPYLRRLPQRQSQLHAERAIGPQQRFAGGERLTAEQRCRRGIRIGQVIHQQIKALICHSQLLQRDSRIAKLHADTRIVQRPLMQRRQILAGQVDHGSIQFGDHHLLHPRIPEQFAGRSTIPTAQHQRPPRPRMRQPRHMDQRFVAQKGIRLTGHRTSIQCIQTTKTVALPDLPSLIRAAAPCEAAPVQAQLPAGQMLAEKAGFHRQRRLIHEPHPVRKLRPLG
NODE_11_length_137584_cov_6.95087_ID_19	fig|857335.5.peg.218	NODE_11_length_137584_cov_6.95087_ID_19_38784_37828	38784	37828	-	Permease of the drug/metabolite transporter (DMT) superfamily	FIG00846773	atgcaagaatcccccgcccagttccgtctcggtatcacgctcgccatccttgcggcgaccggcttcgcagccaaggccatctttgtcaagctcgcctaccgccacggtgtagacgccatcagcctgctcaccctgcgccttggctataccctgcccatactcggcatcgtctggctgctgcgcggcggagagcgtggtgcgccgctgacctggcgcgaccggggatggctgatcctgctcggtctgctgggctactacctctccagcctgttcgacttcctcggcttgcagaccgtcagcgccagcctggagcgcatgatcctgtatctctaccccacgctcacagtcctgttctcggccctgctcacacgcaccgcgatctcccggcgcatctggcag…	MQESPAQFRLGITLAILAATGFAAKAIFVKLAYRHGVDAISLLTLRLGYTLPILGIVWLLRGGERGAPLTWRDRGWLILLGLLGYYLSSLFDFLGLQTVSASLERMILYLYPTLTVLFSALLTRTAISRRIWQALPLTYAGIALVMLPEFQAMQADLAGVLLIVASTVCYALYLTWSPAVITRVGAMRFTELALSVSALAMLLHFALTRPISGLAAQPLAVHGWSVLMALLSTVLPIYALAAAMRRIGAGRAAVVGSFGPLLTIMMSMGVLDEHFAPLQWSGVMLVFLGVWLVSRAPRPGVQPLVSPASQGGKASKAG
NODE_11_length_137584_cov_6.95087_ID_19	fig|857335.5.peg.219	NODE_11_length_137584_cov_6.95087_ID_19_39390_39028	39390	39028	-	hypothetical protein		gtgctggccagcctgctccctctgctcgtggcttgcggaggtggcgatccgctggggttgtacacctcggtatggatcaacacgctggatgcgccttccgaacgcaatcgtggcgaaaccatcaccgtcgaagccaccgctggctacttcggcgagatatcgggtggcgacctgcgctgggatctgaaccagatcagcggcaacagcatcagcgacctcaccagtgaggtggacgacaacaatcgccacgtccgcttccgattcaccgcacccgatgggcaaggcggcctgttgctggagatccgcgtgcgcgcccggcatttcgccgacacccggcgcttcaccatccgcatccgggactga	MLASLLPLLVACGGGDPLGLYTSVWINTLDAPSERNRGETITVEATAGYFGEISGGDLRWDLNQISGNSISDLTSEVDDNNRHVRFRFTAPDGQGGLLLEIRVRARHFADTRRFTIRIRD
NODE_11_length_137584_cov_6.95087_ID_19	fig|857335.5.peg.220	NODE_11_length_137584_cov_6.95087_ID_19_40260_39511	40260	39511	-	FIG01059005: hypothetical protein	FIG01059003	atggccgccagcgcagaccgcttcgtcgccctcttcatcgacgccgacaatgccccggcctcgcacatcgacgtgatcctcaacgaactggcaggtttcggcaccgtcagcatccgccgtgcctacggcaactggaagggcgaacgcctcacctcatgggagcgcatcctgcatgaatatgcgatccagccgatccagcagttcgatctcaccaagggcaagaacgccaccgacatggcactcgccattgatgccatggacgccttgtattcccggcgcgtggacgtattcgcactggtctcctcggactccgacttcactccgctggccacccgtctccaggccgatggcaagctggtggtagggtttggcgaacgcaagacgcccgcccccttcgtc…	MAASADRFVALFIDADNAPASHIDVILNELAGFGTVSIRRAYGNWKGERLTSWERILHEYAIQPIQQFDLTKGKNATDMALAIDAMDALYSRRVDVFALVSSDSDFTPLATRLQADGKLVVGFGERKTPAPFVNACSKFLYLDCEEAAPQGENGHLPSASVKKWSAKELKGDTKLVTLLRNAVQAAEGDDGWSPLGRVGSQIANQASFDSRNYGYKKLVDLFRAADLFDLESREDKGVFLRDRRKPRNT
NODE_11_length_137584_cov_6.95087_ID_19	fig|857335.5.peg.221	NODE_11_length_137584_cov_6.95087_ID_19_43485_40402	43485	40402	-	Acriflavin resistance protein	FIG00007059	atgagactttccgagcagagcatccaccggccagtcgcgacaacgcttctctggctggcgatcatgattggcggcattgccgcctggttcaatctgccgattgcggcactgccttccttcaaccagccgatcatccaggtcagtgccagtctgcccggcgccagccctgagactatggcgtcttcggtggcgacgatcctggagcgtcagttctcgacgatctccggcctgaagatgatgacctcgacgagccagctgggcagcacgtcgatcacgctggaattcatcccttcgcgcgacatcgatgccgctgccgtcgacgtacaggcagcgatcatgcgtacccagcgccagttgcccaaagacatgaccaacccgccgagttaccgcaaggtcaac…	MRLSEQSIHRPVATTLLWLAIMIGGIAAWFNLPIAALPSFNQPIIQVSASLPGASPETMASSVATILERQFSTISGLKMMTSTSQLGSTSITLEFIPSRDIDAAAVDVQAAIMRTQRQLPKDMTNPPSYRKVNPADDPVLFITIDSPSISLDQLNDYADNLISPTLSTLDGVAQVTINGQKRYAVRITVDPVKLASRDLSIGELSNALAASNSNTPLGAYDGERQTLVISANDQLMNAADFVRMIVATRNGQPVRLSDVATVADSVENMKSASWVNGKRAINLQVLRQPSANTVAVVDAVRAAIPRLKAQLPASVDIQILNDRSLSIRESIHDVSLTMLLTIGLVMLVILLFLRRLSATLIPSVSLPASLLGTFGLMLWFGYSLDNISLMGLTIAIGLV…
NODE_11_length_137584_cov_6.95087_ID_19	fig|857335.5.peg.222	NODE_11_length_137584_cov_6.95087_ID_19_44780_43482	44780	43482	-	Probable Co/Zn/Cd efflux system membrane fusion protein	FIG01017256	atgccgcgctcatccttcatcgcgtttgccttgtcctgcgtcctgctggcggcctgccagaaaggcgaagcgccggcaggaaacaatgcgcagggagcatcacccaacgcacagcaaggcagcagcggcccgcgcgcccagctggttgccacgacggtcagccgtacggaggatgtcccgctgcgcatcgaggcccagggaaacactctggccctcgatgaagtggatatccgtccccagaagaacggcatgatcacggccatacactttcgcgaggggaatgagctgaaggccgggcagctgatgttcacgctcgatgcccgcgatgacgatgccaacgtgggcaaggcggaagctgccgtcgccagcgcggaagccggcgtgacgatcgcggagcgc…	MPRSSFIAFALSCVLLAACQKGEAPAGNNAQGASPNAQQGSSGPRAQLVATTVSRTEDVPLRIEAQGNTLALDEVDIRPQKNGMITAIHFREGNELKAGQLMFTLDARDDDANVGKAEAAVASAEAGVTIAERDLARSQELYEKQYIAPSALDTSRNRLDTAHANLRQAKAALEQAKVSRSYTRITAPFDGRAGVINVRPGSLVTSTSTATALVRLTRMDPIGVSFSISESDMPPLLDALRKGTVPLTAQTIAQATLKGSVNFVDSNVDRTSGTLLVKGSLDNHDRLVWPGQFVNVLVEAGELKDVVVLPTQAVVNGPDYRFVYAVKDDQTVEQRRVEVLRIVDQKAVIRGLPAGVKVVLEGTQNLRPGAHIRENRSDAAQGSSAAPSGPVEIPDGFKP…
NODE_11_length_137584_cov_6.95087_ID_19	fig|857335.5.peg.223	NODE_11_length_137584_cov_6.95087_ID_19_45053_46075	45053	46075	+	RecA protein	FIG00000234	atggacgagaacaaggccaaggcgcttgccgccgcgctgtcgcaaatcgagaagcagttcggcaagggctccatcatgcgcatgggcgatggcaagctggaagagaacatccagtccgtctccaccggttcgctggggctggacatcgcgctgggcatcggtgggctgccgcgtggccgtgtggtcgagatctacgggccggaatcctccggcaagaccacgctgacgctccaggtgatcgccgaaatgcagaaaatcggcggcacggctgccttcatcgatgccgaacatgcgctggacgtgcagtacgcagccaagctgggcgtcaaggtcgaggatctgctgatttcgcagcccgacaccggtgagcaggcactggagatcgccgacatgctggtg…	MDENKAKALAAALSQIEKQFGKGSIMRMGDGKLEENIQSVSTGSLGLDIALGIGGLPRGRVVEIYGPESSGKTTLTLQVIAEMQKIGGTAAFIDAEHALDVQYAAKLGVKVEDLLISQPDTGEQALEIADMLVRSGGVDILVIDSVAALTPKAEIEGEMGDQLPGLQARLMSQALRKLTANIKRTNTLVIFINQIRMKIGVMFGNPETTTGGNALKFYASVRLDIRRTGTIKKGDEVVGSETKVKIVKNKVSPPFKEAHFDILYGEGISREGEVIDMGVDHKIVDKSGAWYAYNGEKIGQGKDNAREFLRANPALAVEIENRVREAVGVVPVAVVATGEA
NODE_11_length_137584_cov_6.95087_ID_19	fig|857335.5.peg.224	NODE_11_length_137584_cov_6.95087_ID_19_46072_46542	46072	46542	+	Regulatory protein RecX	FIG00004099	ttgagcgacgaccggctggcgccactgcgggcgcgtgcgctgcgcctgctcgccacgcgtgagcattccctgcaggaactgcggcgcaagttgctggacaaggatgccgatgcggaagatgtggatgcagtattggcacgccttcaggaaaccggcctgcagtctgacgcccggtttgccgagagtttcgtgcgcaaccgtgcatcgcgcatgggggttgcacggatacggcgcgaattgggagagcgcggcgtagcaggcgaagaggctgccgaggcgctcggggatgcgctgaaagaggatgagttggcccgcgccagggcagtgtggggccggaagttcggcgagccgccgcgggatcgacaggattgggcgcgccaggcacgctttctgcagtcg…	MSDDRLAPLRARALRLLATREHSLQELRRKLLDKDADAEDVDAVLARLQETGLQSDARFAESFVRNRASRMGVARIRRELGERGVAGEEAAEALGDALKEDELARARAVWGRKFGEPPRDRQDWARQARFLQSRGFATEVIRKLLKEPFDESAQGQ
NODE_11_length_137584_cov_6.95087_ID_19	fig|857335.5.peg.225	NODE_11_length_137584_cov_6.95087_ID_19_46520_47242	46520	47242	+	Lipopolysaccharide ABC transporter, ATP-binding protein LptB	FIG00002720	atgagtctgctcagggtcagtaatctgcagaagcgctacaagtcgcgcaccgtggtgcacgatgtctccttcgaggtcggtagcggcgaggtcgtcggtttgctgggcccgaatggtgcaggcaagaccacctgtttctacatgatcgtcggcctggtgcgcgcggatggcggcagcatccatctggacggcaccgacctcacccattggcccatccatcgtcgagcccatcagggtctgtcctatctgccgcaggaaaattccgtgttccgcaagctcacggtgtcggagaacatcctggctgtactggagctgcagaagctcggcaagacggaacaggcaaaacggctggacgaattgctggacgaactgaacatctcgcacctgcgggatgcgacg…	MSLLRVSNLQKRYKSRTVVHDVSFEVGSGEVVGLLGPNGAGKTTCFYMIVGLVRADGGSIHLDGTDLTHWPIHRRAHQGLSYLPQENSVFRKLTVSENILAVLELQKLGKTEQAKRLDELLDELNISHLRDATAQSLSGGERRRVEIARALATRPRLILLDEPFAGVDPIAVIDIQKIISYLKARDIGVLITDHNVRETLGICDHACIINSGEVLAGGKPDEIVQNDQVRQVYLGEHFRM
NODE_11_length_137584_cov_6.95087_ID_19	fig|857335.5.peg.226	NODE_11_length_137584_cov_6.95087_ID_19_47277_48770	47277	48770	+	RNA polymerase sigma-54 factor RpoN	FIG00006092	atgaaaccatccttacaactccgcatctcccagcacctggcgctgacgccgcagctgcagcaatccatccggctgctgcagctgtccacgcttgaactgaaccaggagatcgaacgcatcctgctcgagaatccgatgctcgagcgcgaagggggtgaggatgacgacggcgctgttgcgcctgtggctgaggcgcctgtggcattggcggaagaattcagtggcgaatctttgccgcgtggtgacgaggagcacgaggcgccgggcgtcaccgagatgccggacaacatcagcgatgcctacgagtcggtgtcggacgatgacatcggcgaagctgccgaatggcgcaacgaaggcagcagcggttcgcgcaacaacgatgatgaagatgcggacttc…	MKPSLQLRISQHLALTPQLQQSIRLLQLSTLELNQEIERILLENPMLEREGGEDDDGAVAPVAEAPVALAEEFSGESLPRGDEEHEAPGVTEMPDNISDAYESVSDDDIGEAAEWRNEGSSGSRNNDDEDADFQEFQAATTSLREHLLSQIALMPLTDRDRALVQLVVEALDDDGWLNQALDELLPLIPAEWDVELEELEIALHHVQNLDPVGIGARNLQECLLLQLRGLPEGEVRQLAMGIVDGNLELLAARDFARLKRRLGCNDDALRAAQELVCSLNPRPAAQFADTDTRYVIPDVVVRKVRGAWSASLNPEAMPRLRIHRVYADILQNNRGVSSSLSSQLQEARWLIKNVQQRFDTILRVSQAIVDRQRQFFDHGEVAMRPLTLREIAEELELHE…
NODE_11_length_137584_cov_6.95087_ID_19	fig|857335.5.peg.227	NODE_11_length_137584_cov_6.95087_ID_19_48802_49125	48802	49125	+	Ribosome hibernation protein YhbH	FIG00001229	atgaatatcaccatcaccggacatcacctggacgtaactcccgcgttgcgtgaatacgtgacgtccaagctcgatcgggtcatccgccatttcgatcatgtgacggcgacccatgtcaccctctcggtgcagaagctgaaacagaaggccgacgtgaccgtgcatgtgcgcggtaaggacatccatgtcgagagcgaagcggatgatctgtatgccgcaatcgatgcgctggccgacaaactcgaccgccaggtcgtcaagcacaaggaaaaggcggcagatcacggctatgactccgtgaagcgtgctgtcggcgcggaatga	MNITITGHHLDVTPALREYVTSKLDRVIRHFDHVTATHVTLSVQKLKQKADVTVHVRGKDIHVESEADDLYAAIDALADKLDRQVVKHKEKAADHGYDSVKRAVGAE
NODE_11_length_137584_cov_6.95087_ID_19	fig|857335.5.peg.228	NODE_11_length_137584_cov_6.95087_ID_19_49340_49825	49340	49825	+	PTS system, fructose-specific IIABC component (EC 2.7.1.69)		atgaatcctgtcgcccagatcctcgcgcccgaacgcatccttgttgacttggaagtcagcagtcgtgaggacctgttcgcagccatcggcgatttgtttgcccgccagcattctctaggcgcgggaaagatcgcggaagccttgcttacacgcgagcgcctcggttccaccggactgggcatggggatcgcgattcctcatcagcgcatcaaggggctcaagacgcctttaggcgcttttgtccgcaccgctgcaccgattgagttcgctgcgctggatggtcagcccgtgcgcctttttttcatcatgctggcacctgagcaagccaccgaaggtcatttgtgcctgttggcggagctggcacagatgttcagtgacaaggtgctgcgcgaggcgcta…	MNPVAQILAPERILVDLEVSSREDLFAAIGDLFARQHSLGAGKIAEALLTRERLGSTGLGMGIAIPHQRIKGLKTPLGAFVRTAAPIEFAALDGQPVRLFFIMLAPEQATEGHLCLLAELAQMFSDKVLREALYVAPDAAAVFALFDDWSLHAAGERSAAV
NODE_11_length_137584_cov_6.95087_ID_19	fig|857335.5.peg.229	NODE_11_length_137584_cov_6.95087_ID_19_49794_50741	49794	50741	+	HPr kinase/phosphorylase (EC 2.7.1.-) (EC 2.7.4.-)	FIG00004170	atgcggcgggcgagcgtagcgcagctgtttgaggccaaccgcggggcgctgcagctgcgccatgtggccgggcgtctcgacacgttcctgagcgcggcagacagcaaggtctggccagccgacatggtcggccacctgaacatgatccacccttcccgcctgcagatcatgggcgaggcagagtttgcctgggcgcgccagcagacgcgcgagcggctggacatgtacatgctggggatgatcacctctccaccgccgggcatcatcgtggccgatgactgcgaagtgcctgagatcgtgcgtcgtgcctgcgatgaagcgggcgtgccggtgatggcttcgccactggagtccgcaagggtgatcgaagtcctgcgcggttatctgtcgcgcaagatg…	MRRASVAQLFEANRGALQLRHVAGRLDTFLSAADSKVWPADMVGHLNMIHPSRLQIMGEAEFAWARQQTRERLDMYMLGMITSPPPGIIVADDCEVPEIVRRACDEAGVPVMASPLESARVIEVLRGYLSRKMAERVSLHGVFMDVLGVGVLITGDSGAGKSELALELISRGHGLVADDVVEISRVAANVLEGRCPEMLKDFLEVRGLGILNIRTIFGETACRRKMRLKLIAHLQRRSFAQDEPLRLPYDGEDAQDVLGVPVRRVVLPVAAGRNLSVLLEAAVRNTILQLRGIDSTQEFVVRQRALLDQDDPYES
NODE_11_length_137584_cov_6.95087_ID_19	fig|857335.5.peg.230	NODE_11_length_137584_cov_6.95087_ID_19_51017_51763	51017	51763	+	Ferric siderophore transport system, periplasmic binding protein TonB		atgtacttcacagcatcgacgcccctgagtttttcgcagcgcacattcagtcttctggccgtgggcggccttcacctgctggctgcgctggggctgatggcgctggtacagccggtggtgcagcatctggcaaagcctttgcgtatcgatttggtggcagctgcccctgcgcctgccggaccgccagagcccgtggtggaggctccgaagcctctgccgatgaagcgccaggagccagtgaagcctgttcgcgagatcaaacctgttccacctgtgccggtgacgccacctgtcatccaggcgccccctgaaccggctgccgtagctccggcggcctataccgcaccgcccccgccgatcgaccctgctcccgccgtagttcctgaaggaggcagtggc…	MYFTASTPLSFSQRTFSLLAVGGLHLLAALGLMALVQPVVQHLAKPLRIDLVAAAPAPAGPPEPVVEAPKPLPMKRQEPVKPVREIKPVPPVPVTPPVIQAPPEPAAVAPAAYTAPPPPIDPAPAVVPEGGSGKVAPVAAGGKGGGGDGGAGEAEQGARHDADYLHNPKPQYPRASRSLGEEGTVWLRVQVSEAGRALQVLVDTSSGFSRLDRAAREAVANWCFEPARRGPQAVTTWVRIPIAFALDR
NODE_11_length_137584_cov_6.95087_ID_19	fig|857335.5.peg.231	NODE_11_length_137584_cov_6.95087_ID_19_51809_52531	51809	52531	+	MotA/TolQ/ExbB proton channel family protein	FIG00002161	atggaaactcaaaccctgggcttcgcccacttcatctctcaggccgatggcttgggcaagacgctgttcgtggtgttgttggcgatgtcgctggcttcctggtatttcattgcgaccaaggccgtgagcaatcttcggcggcggcgcaattcggcgcgtttcgtcgagatgttctggaatgccagttccatcgaggaagtacgcaacgagatcagtacacacggggcagacgagcccttttcgcacctgaccagtcatgcaatcttcgcgcgtgatcatcatcagcgtatcggaggcggcaagctgggcgaagccggctctctgggagagtttctgacccgtggcatgcgcaaggtgatcgatgaggagactgcacggctggagaatggactgactctc…	METQTLGFAHFISQADGLGKTLFVVLLAMSLASWYFIATKAVSNLRRRRNSARFVEMFWNASSIEEVRNEISTHGADEPFSHLTSHAIFARDHHQRIGGGKLGEAGSLGEFLTRGMRKVIDEETARLENGLTLLATVGSTAPFVGLLGTVWGVYGALVSIGMSGAGTLDKVAGPVGEALIMTGLGLAVALPAVVAYNVFTRHNRLTLSGLDAFAHDLFAYLTTGAMNQNGRVVSLNQGVA
NODE_11_length_137584_cov_6.95087_ID_19	fig|857335.5.peg.232	NODE_11_length_137584_cov_6.95087_ID_19_52531_52956	52531	52956	+	Biopolymer transport protein ExbD/TolR	FIG00017761	atggctttcggcggattcaacaaggaaggcggcggcgcgcccatggcggagatcaacatggtgccgttgatcgacgtgatgctggtgctgttggtgatcttcatcctgaccgcccccttgctgacgcatgcagtgaaagtggagttgccaaggacatccagccaggagttgctggcgccaccggagcgcatcgagattgcactgacgccgacctctgaattcttctgggacggtgagcgggtggatgaagccgcactggagacgcggttcaaggccgctggggagcgcgtagcggatgctgccaacgcccccgagattcatctgcgtgccgacaagacgacgccttacgagggcgtggccaaggtgatggcggcggctgcgcgtgccggtctgaccaag…	MAFGGFNKEGGGAPMAEINMVPLIDVMLVLLVIFILTAPLLTHAVKVELPRTSSQELLAPPERIEIALTPTSEFFWDGERVDEAALETRFKAAGERVADAANAPEIHLRADKTTPYEGVAKVMAAAARAGLTKIAFVSQPD
NODE_11_length_137584_cov_6.95087_ID_19	fig|857335.5.peg.233	NODE_11_length_137584_cov_6.95087_ID_19_54012_53086	54012	53086	-	Adenylate cyclase (EC 4.6.1.1)	FIG00001294	gtgactgacacctacatcctcgtcgccgaggtttccggtgaccagccattgcatggcaagctcggctcggtggaaacacaacgcgccgtggaacgttgccgcaaccgcgccgagcgtgcgatcgaggcctacctgggcaaacacatcaaggcagaaggacgccagttgatcgcccatttcccgcgcggagaaaatgcagcgcttgccgcattcgacatgcgcgaccgggtccgccagcttcccccggtttccggcgtagctctggcgatcaatatcgcggtgcatgcacgtaccaccgaggatccagcagacgatgtcgcacaaagtctggccagggtctgccccagcggtcagattcttgtcagcgaggaagccgccgaggggtttccgcccaatatc…	MTDTYILVAEVSGDQPLHGKLGSVETQRAVERCRNRAERAIEAYLGKHIKAEGRQLIAHFPRGENAALAAFDMRDRVRQLPPVSGVALAINIAVHARTTEDPADDVAQSLARVCPSGQILVSEEAAEGFPPNIREQLGTADLDAPPDLYPQPLYVFRTGATLAGTMAKAGEPATAPAASTSPAPAARSDAETVARPVGMRGSLMLRHNKNNLSVSDRQPVVLAGREEGNDLVIADRRASRHHARIEWRQNHFILIDTSTNGTYMVDDEGHEVVLRRGETDLPKRGRIGFGYSPTEVGAEVVFFDLGHR
NODE_11_length_137584_cov_6.95087_ID_19	fig|857335.5.peg.234	NODE_11_length_137584_cov_6.95087_ID_19_54889_54005	54889	54005	-	tRNA(Cytosine32)-2-thiocytidine synthetase	FIG00138938	gtgggccaggcgatcgccgacttcaacatgatcgaagaaggcgatgtggtgatggtctgctgctccggcggcaaggattcctttgcgctgctcagtctgctgacgagcctgcgcgaacgcgcgccggtggacttccgcgtcattgccatgaatctcgatcagcgtcagccaggttttccggccgacgtcctgccgacctacttcgaatccatcggagtcgaatacaggatcgtcaccgaagatacctattcgatcgtcaaggagaagatccctgaaggtaagaccacctgctccctgtgctcccgcctgcgccgcggcatcatttaccgcacggccagcgaactgggcgcaaccaagatcgcgctgggccaccaccgcgaggatctgatcgaaaccctg…	MGQAIADFNMIEEGDVVMVCCSGGKDSFALLSLLTSLRERAPVDFRVIAMNLDQRQPGFPADVLPTYFESIGVEYRIVTEDTYSIVKEKIPEGKTTCSLCSRLRRGIIYRTASELGATKIALGHHREDLIETLFLNMFFGGKLKAMPPKLRSDDGRHTVIRPLAYCAEADVARFARAMEYPIIPCNLCGSQEQAQRKQTKALLADWERQFPGRIESIATALQNVVPSHLADGSLFDFKTLSQHTGDLPPETLFDDPVPEARIPAVAPIAWTMPVNDLRNASDHAPQLHEELARD
NODE_11_length_137584_cov_6.95087_ID_19	fig|857335.5.peg.235	NODE_11_length_137584_cov_6.95087_ID_19_56347_55106	56347	55106	-	Nitrogen assimilation regulatory protein ntrX		atggcaaagatcctggttgtagatgacgaagtcggcatccgcgaattgctgcaggagatcctgcgcgacgagggttacgatgtcgcgcaggccgaaaatgccgccagcgcacgcgaggcacggcaaaatttccagcccgacctcatcctgctcgatatctggatgcccgacaccgacggcatcagtctgctcaaggaatgggcggcaggtggacctctggatgcgccggtgatcatgatgtcggggcatggctccatcgacacggccatcgaagcggtccgcttcggcgcgctggatttcctggaaaagcccatcgccctgcaaaagctgttggcgacggtcaagcgcggcctgcaacgccagaccaacaaacctcgccagcacccactgtccttgtcg…	MAKILVVDDEVGIRELLQEILRDEGYDVAQAENAASAREARQNFQPDLILLDIWMPDTDGISLLKEWAAGGPLDAPVIMMSGHGSIDTAIEAVRFGALDFLEKPIALQKLLATVKRGLQRQTNKPRQHPLSLSAFRSAALRDLRKRLEQMAQKCRQILLRTGPGSLAELCARSLHASGTPWLDLGNLHQPLDLGTLEDAKGGLLFVEELQRLGRAQQKNLAFALERLERYDLHLLMATTSTPEQLLTEGWEPGLIARLFDISLVSPSLLELKDEVPEIVSRLLIHFSESGETPSRRLGSAALHALRNTPWGGGFGELKAAIRSLALGALNEEISADEVVRFVSRNANAALALPLDLPLREARESFERMYFEHHLQLEDGNITRLAEKTGLERTHLYRKL…
NODE_11_length_137584_cov_6.95087_ID_19	fig|857335.5.peg.236	NODE_11_length_137584_cov_6.95087_ID_19_58495_56393	58495	56393	-	Nitrogen regulation protein NtrY (EC 2.7.3.-)	FIG00452769	atgaagcgcctgctcgtcattgtcctcgcgctgggcgcaatcctgctcttcctgctcgcatcggccggcgcgaacacttccctgttcgcccgtcattatccgctgctgctggggttgaactttgcgctggcactcgcgctggccgtgctcgtaggcatccagctgcgggggctgtggcgggaatacaagctgcgccagttcggctcccgcctcaagctcaagctgatgggcatgttcctgctgctggccatcctgcccgggtcgctgatctacctgatctcggtgcagttcgccgtacattcgatcgagtcctggtacaacgtacgcgtggactccgcgctggaatccggcctgaatctgggccgcagcgcactcgatgcactggtcgaccagctggga…	MKRLLVIVLALGAILLFLLASAGANTSLFARHYPLLLGLNFALALALAVLVGIQLRGLWREYKLRQFGSRLKLKLMGMFLLLAILPGSLIYLISVQFAVHSIESWYNVRVDSALESGLNLGRSALDALVDQLGERSRGIALELGDHGTPSLPALIRVREQLDADEVSVISTSGRVIVSTGSTDRTLAPDVLPSQQLRQARQGRGYRAVEAQEDRLIMRVVVPISSRLLQADPLLLQVRSAVPDLLAQSAERVQDLHQDYQELLQSRQGLKRIYLITLTLALLLAMSAAMAVAFMFARSLSAPLSILAEGTQAVAAGDYSPRQALPARDELGILTQSFNRMTRQLQDARAQADKSRAAVDASRAYLESVLANLSAGVLAFSPEGELRAANRGAVTILQDE…
NODE_11_length_137584_cov_6.95087_ID_19	fig|857335.5.peg.237	NODE_11_length_137584_cov_6.95087_ID_19_59019_58492	59019	58492	-	Probable proline rich signal peptide protein	FIG00431601	atgctggcttcgcgccctgcgcaagccaatgacacacgcttccgttcgcacgaactggtgcaggtggatgattccgtcgtcctcaacgccgccgtcaccatgacacctggcgcccgcctgcaggaattggtcgacagtggtctgtcggtacccttccggctggaattcgtgctcacccgcccgcgctggtactggctagatgaaacggtcatctcgcgcaatctggatctgcggctttcctatcacgccctgacacgccaataccgtctcgccgtcggcagcatccatcgcagtttcgcggaattcgacgatgcgctgcgcgccatgcttaccgtccgcaactgggaagtggcggacgggcgaaatctgcgcgaacggcgcgattacaaggcttcgctg…	MLASRPAQANDTRFRSHELVQVDDSVVLNAAVTMTPGARLQELVDSGLSVPFRLEFVLTRPRWYWLDETVISRNLDLRLSYHALTRQYRLAVGSIHRSFAEFDDALRAMLTVRNWEVADGRNLRERRDYKASLRFRLDITQLPKPFQVAAFGDSELDLSTGWVSWQVRIDDTGHE
NODE_11_length_137584_cov_6.95087_ID_19	fig|857335.5.peg.238	NODE_11_length_137584_cov_6.95087_ID_19_60400_59078	60400	59078	-	Ribosomal RNA small subunit methyltransferase B (EC 2.1.1.-)	FIG01958964	atgaaccgaccacgcaatccacgcccactgcctgacctgcccgaagactcactcgccctggcctttctcgtggccagcgacgcactcgccgccgtttcccgtggtcacgcgctgaacgacggcctgcaagggctctggcgcgcctggccggcgttgcctgcgggcacgcgcggcgcagtacaggatctgctctacggctgcctgcgcgatttcggccggggccgccatctgcttgccggcctgatcgatcgcccgctcgatgaagcccgtatcgaagccttgctgctgctggcactgcatcgcctagaggctcgcctggagcaggcgcacaccatcgtcgatcaggccgtcgaagcggcagcccggattgcccgcggccgcctgaagggactcgtcaat…	MNRPRNPRPLPDLPEDSLALAFLVASDALAAVSRGHALNDGLQGLWRAWPALPAGTRGAVQDLLYGCLRDFGRGRHLLAGLIDRPLDEARIEALLLLALHRLEARLEQAHTIVDQAVEAAARIARGRLKGLVNGVLRNALRQWPELLARADGDPQARYRHPLWWQLLVKRAHPNDWETVLTANNTHPPMALRLNRRRTTLAAYSAQLEAAGLRWRALGEHALLLEQPCPVGRLPGFSEGLVSVQDWGAQQAPQLLDLSRGQRVLDACAAPGGKTAHLLETTDISLVALELVEARARRVEENLARLGLTAELRTADCRDLEAWWDGRPFDRILADVPCSASGVARRHPDIKWLRREEDVAGFATQQAEILAALWQVLAPGGKMLYLTCSLFPEENARQMA…
NODE_11_length_137584_cov_6.95087_ID_19	fig|857335.5.peg.239	NODE_11_length_137584_cov_6.95087_ID_19_61031_60408	61031	60408	-	Septum formation protein Maf	FIG00021845	atggcatccactgtcctgcctccgcgcgtctatcttgcttcgcgcagcccgcgaaggcgggagctcctgacccagatcggcatcgaattcgaaaccctgatattccgggcgcccccccgggacgacctcgatgtgagcgaagaagtacttcccggcgaagatgccgcaacctatgtccagcgggtggccctggccaaggccgagggtggcctggcgcgcctgcgctggcggagtctgcattaccagccggtactctccgccgacacaacgctggatcttgatggcgagatcatcggcaagcccgaggatgccgatcacgcccgcgcgatcctgcgtcggctgagcggacgcagtcaccgcgtcttgaccgcggtggcggtggcggaccgggagcgcatg…	MASTVLPPRVYLASRSPRRRELLTQIGIEFETLIFRAPPRDDLDVSEEVLPGEDAATYVQRVALAKAEGGLARLRWRSLHYQPVLSADTTLDLDGEIIGKPEDADHARAILRRLSGRSHRVLTAVAVADRERMAHRLSISTVTFRTLSDMDIDHYIASGEPFDKAGAYAIQGRAGAFVREIHGSYSGIVGLPLFETAELLAEFGLGH
NODE_11_length_137584_cov_6.95087_ID_19	fig|857335.5.peg.240	NODE_11_length_137584_cov_6.95087_ID_19_61472_61035	61472	61035	-	LSU m3Psi1915 methyltransferase RlmH	FIG01280345	atgcctgactgggtgacgatcggctggcaggaatttgcccgacgcctgccgcgcgaatgtccgctggaattgcacgaagtgaaagccgagccgcgaacctccggcaagccgcctgccgcgctgatgacggccgaggctgaacgtctgcgtgccgctctgtctgcacgccgccggctggtggtgctggatgagcgtggcgacgatctgagtacccgccagctcgcccagcgtctggaaaaatggcagggcgaaggcgacgatgtggtgttcctgatcggcggcccggatggtcttgatccgaccctgaaggccgaagcacacgagcgtatccgcctctccagcctgacgctgccacacgcaatggtgcgtccgctgctggctgaagcgctgtatcgtgcc…	MPDWVTIGWQEFARRLPRECPLELHEVKAEPRTSGKPPAALMTAEAERLRAALSARRRLVVLDERGDDLSTRQLAQRLEKWQGEGDDVVFLIGGPDGLDPTLKAEAHERIRLSSLTLPHAMVRPLLAEALYRAWSLSHNHPYHRE
NODE_11_length_137584_cov_6.95087_ID_19	fig|857335.5.peg.241	NODE_11_length_137584_cov_6.95087_ID_19_61873_61502	61873	61502	-	Ribosomal silencing factor RsfA (former Iojap)	FIG00135315	atggatatccacacgctgcagcaaaccgtcgtcgacgcactggaagacatcaaggccagcgacatcgagatcatcgatgtgcgcaagctcacatccctgttcgacctcgtgatcatcgccagcgcaaactcgaaccgccagacccgggcgcttgccggcaacgtgcaggaaaaggtcaaggctgccggtggcgaagtcctcagcatcgaaggcgaggaaaccggcgaatgggtgctggtcgacctcggtgatgccgtggtgcacatcatgcaacctgccgttcgtgcctactacaacctggaagagctctggtctgccaccccggccgcacatcgccgcgtctcgggtgaagcggccgtccggggacgatga	MDIHTLQQTVVDALEDIKASDIEIIDVRKLTSLFDLVIIASANSNRQTRALAGNVQEKVKAAGGEVLSIEGEETGEWVLVDLGDAVVHIMQPAVRAYYNLEELWSATPAAHRRVSGEAAVRGR
NODE_11_length_137584_cov_6.95087_ID_19	fig|857335.5.peg.242	NODE_11_length_137584_cov_6.95087_ID_19_62726_61959	62726	61959	-	FIGfam005179		atgcaggcgcaaaagctgcccgcgctgcgtggctggacctggctggtcgccggcgtgcgcctgtggcgccaatcaccgttggccctgacgggcgcggcgaccttcatgacgctcggactgctcctgctgctgaccttccccctgtttggccagatcgcgttcccgctgctgctgcccgcgctgggggttggcatgttcctgctctgcatggcggttcgcgccggcaggcccgcaccgccagccctgttgttcggcgcgtttggccctcgtctgcctgccttgctcgcactgggtgccctgcgaatggcctacggcatgatcgcggcgatgctcgccatgcaactggcggggctcgatctttcgatggcacaggtggacaccggcagtctgggagatgaa…	MQAQKLPALRGWTWLVAGVRLWRQSPLALTGAATFMTLGLLLLLTFPLFGQIAFPLLLPALGVGMFLLCMAVRAGRPAPPALLFGAFGPRLPALLALGALRMAYGMIAAMLAMQLAGLDLSMAQVDTGSLGDEPGVVVRMPEGTSQFMVWLLVISLPMEMASWFAAPLIALRRQALFKSMFFSFVACLRNLGAFVVYMLSFSLCMMILPITVALQLGQLFPTLGSLLLAPVVMLAVPIFFTGFYCCAEDIFGNWE
NODE_11_length_137584_cov_6.95087_ID_19	fig|857335.5.peg.243	NODE_11_length_137584_cov_6.95087_ID_19_63502_62726	63502	62726	-	Possible transmembrane protein		atgcatcttcgcggcctcccgaccgtccgcaaggtcttgcctctgcgcagcctcttctggctgcaatccggctggagactctttaccgggcatcccgtggaatggctgctgactgcactgctggccttctcgctgctggcgttgagcactttgctggtccccattcccctgctcggcccggtgttcccgcccctgctgctggcactgctgctgggcggcatgctgcatgctgcgatgcgccagcaggctggcgaggcgccgcgcgtggaagacatgttcgccggcatccgtcgccaccccggcaagctcgcgctggcaggtctgttttacgccgtgccgctggtcttgatccatctgctgacctatctcgccatcagtggcagtctgctggtcagcctg…	MHLRGLPTVRKVLPLRSLFWLQSGWRLFTGHPVEWLLTALLAFSLLALSTLLVPIPLLGPVFPPLLLALLLGGMLHAAMRQQAGEAPRVEDMFAGIRRHPGKLALAGLFYAVPLVLIHLLTYLAISGSLLVSLFGMAVGGGLQQLLERMLTHLADFGILLLALLFLWGLMMQALLLAPALIMRHDLSTFDAMRLALTAGLRNLPAIVILGLLLYVLLILALAPLGLGFLVYIPLVAGTVHAATEDLFVVPALPALENP
NODE_11_length_137584_cov_6.95087_ID_19	fig|857335.5.peg.244	NODE_11_length_137584_cov_6.95087_ID_19_63624_65720	63624	65720	+	TonB-dependent receptor; Outer membrane receptor for ferrienterochelin and colicins	FIG00120101	atgaccagcgcttataatccgcgcttctggacagccctgcttgcgcgccggccgcgcgggcgatctcacgcgatgccgacactgcttcgtcacatgatttccgccgttgccctgggggcggcctgtgcggcccaggctggtggctcgggggaaaacagctacttcgccgagctgcccacggtgctgactgtgtcccgcctgccacaggcgcagaacgaagcgccgggggctgtcactgtcattgatcgggccctgatccgtgccttggggtatcaggatctggcgcgcgtattgcgtctggtgcccggcatgcaggtcgggcaggagcgcggcaacagccaatgggtcagttatcacgggttgagcagtacctatccgtcagagatgcaggtgcttata…	MTSAYNPRFWTALLARRPRGRSHAMPTLLRHMISAVALGAACAAQAGGSGENSYFAELPTVLTVSRLPQAQNEAPGAVTVIDRALIRALGYQDLARVLRLVPGMQVGQERGNSQWVSYHGLSSTYPSEMQVLIDGRSVYSPSTFGGVDWSALPLSIDEIDRIEVVRGSNAVTYGANAFLGVINIITRHSAEAPGEQGAVTAGSRGIGGVSAGLSRAEEGLGWRLNADIRRDEGFAGLHDDHRNATLSMRSDYQLDVHDELSLRVAASGGRKQLGYTDSPFGANDAREARYRNYILHGEWRHARAEGGEWALRYYRNQDEVDEAWDATLPPYSPLFPAGASVPLNRNRSAVRDHLEFEQRWQPGGVSQAVWGAELRRDRVDAPFLYAQGAPGDQDLYRLF…
NODE_11_length_137584_cov_6.95087_ID_19	fig|857335.5.peg.245	NODE_11_length_137584_cov_6.95087_ID_19_66567_65788	66567	65788	-	conserved hypothetical protein		atgaaaccgccccgcgaagatccacatatcgaccggcaattgctgagcaaggccgatgccctgatcagacgcaaccgccctgacggcgtcggtctggacgcggaggagctccccctgctgacagacgttctcgacgaagatctgccggagctgaccgacgccatcgagatcgatctcgacgatgctgtcgatgcatcttcattccaaccggtcccgcagcgcctgcaggaagccttcagcctgtcgctggatctggaggaagccccccaaccggccagtcacgaggcttccgcaccgaaggaagatgcggcagacgtggtacaggcggtgaacgaggccatggcgcgcgtacgcgatgaaatggcggccgagcgcgagcacgcgatccaggaggtcagc…	MKPPREDPHIDRQLLSKADALIRRNRPDGVGLDAEELPLLTDVLDEDLPELTDAIEIDLDDAVDASSFQPVPQRLQEAFSLSLDLEEAPQPASHEASAPKEDAADVVQAVNEAMARVRDEMAAEREHAIQEVSARVRADVLQEARLQQQRAVQAALAQGREEAEINHWPALQEARKEAMQTAAMHISERLIELDAQIAQSVNAWLSREMPQLIAGELAGLAERLRVQTAAHMRATLLPEISEQVSMVLESALKDDEATG
NODE_11_length_137584_cov_6.95087_ID_19	fig|857335.5.peg.246	NODE_11_length_137584_cov_6.95087_ID_19_66992_66564	66992	66564	-	DNA polymerase III chi subunit (EC 2.7.7.7)	FIG00023690	gtgaccgaggtcaagttctatcacaacgcgccggaccgcctgcgtgcggcctgcgtgatcacgagcaaggcggtggcgcagggccaccgcctggtggtcttcgcgccggatgacaccaccgcgcgcgcctacgacgagcagctctggaccttccagcccggcagtttcgtaccgcacgtccgtgccaactcgccactggccgcccgaacgccggtactgatcacccggtcgctgacggacctcgcctgcagtgatgccctgttgaatctggcccccgacctgccgccggaattctcaagcttcggcatgctcatcgagatcgtcggccaggcagaagccgaccgtgccatggcgcgacaacgctggcggcagtacaaggcgctcgatctccccgtcacg…	MTEVKFYHNAPDRLRAACVITSKAVAQGHRLVVFAPDDTTARAYDEQLWTFQPGSFVPHVRANSPLAARTPVLITRSLTDLACSDALLNLAPDLPPEFSSFGMLIEIVGQAEADRAMARQRWRQYKALDLPVTAHDLGRSAS
NODE_11_length_137584_cov_6.95087_ID_19	fig|857335.5.peg.247	NODE_11_length_137584_cov_6.95087_ID_19_68473_66989	68473	66989	-	Cytosol aminopeptidase PepA (EC 3.4.11.1)	FIG00000336	atggaatttagcataaaagcctccgcccccgagaagctgcgtaccccctgcctcgtcttgctgcatctggtcggacaaccggctagcgcacaattcactgccgtcgacacggccagcggcggtctgctcgaaaaactcgtcaagcgcgatctggatgacaagactggcagcctgctctccatccctgccctgcccggcgttccggcagagcgcgtactcgtggtgagcctcggtgctgccgaggcgctgcagccgcagctcctgcgcagcagtttggccgccatcggcaaatggatcgccggcaacaaggtgacatctgcctcgatctgctgcggtgcgctgcccgcagccctcacggacgcggccacaggcctgcgtctggccgcgcagagtctggtc…	MEFSIKASAPEKLRTPCLVLLHLVGQPASAQFTAVDTASGGLLEKLVKRDLDDKTGSLLSIPALPGVPAERVLVVSLGAAEALQPQLLRSSLAAIGKWIAGNKVTSASICCGALPAALTDAATGLRLAAQSLVDATYRFDAIRGKVENKPRSPVELNFLFDAKPAAELRTALEQGVAIAAGQALTRDLGNLPANYCTPATLADTAKSLAHEYKLKLKVYDRQGIEELGMGSFLAVAQGTQEEPRFITLEYKGGKAKAAPIVLVGKGVTFDSGGISLKPGEAMDEMKFDMCGAASVLGIFRTVAKLGLPINLVGLIPATENLPSGTAVKPGDVVTSLSGQTIEILNTDAEGRLILCDALTYAERYKPACVIDIATLTGACIIALGHHTSGLLANDDALAA…
NODE_11_length_137584_cov_6.95087_ID_19	fig|857335.5.peg.248	NODE_11_length_137584_cov_6.95087_ID_19_68572_69645	68572	69645	+	FIG000988: Predicted permease	FIG00000988	atgatcttcaaacgcgcagcgctgcgcgaattcacggctacagcggtggcagtgttcgtggcgctctttttcattctggttaccgtgatcctggtgcgtctgctctcgcaggccgccggcgggcgcctgccgcccgatgccgtactggcgctgatcgggttctctaccctcaatcatctgccggtggtcctggcgctgtcttcattcattgcggtgctgctgacgctgtcgcgcagctatcgtgactccgagatggtggtgtggttctcctcggggctctccttgctggcctggatccggccggtgctgcaattcatgttgccgctggttgcgctggtggccgccctgtctctgttcctgtcgccctgggcgcagggcaaggcgcaggagtaccgcaag…	MIFKRAALREFTATAVAVFVALFFILVTVILVRLLSQAAGGRLPPDAVLALIGFSTLNHLPVVLALSSFIAVLLTLSRSYRDSEMVVWFSSGLSLLAWIRPVLQFMLPLVALVAALSLFLSPWAQGKAQEYRKRLEGRDEVSRVAPGSFRESSGGRRVFFVESVDPAQGRVHKVFIHSVAPDKQDVTVASEGFMETKPNGDRFVTLADGRRYEGTPGTASYRVMEFERYSVRIEPREVGAAESTPKTQSTASLLLMPGAASSGELVWRLGLPLATLILALLAIPLAFVNPRGGRTNNLVFAILAFSIYFNFLGISQSWVSKGRLGVWSGGLGIHLVMLLLLLVLFLWRMRPHLRFNR
NODE_11_length_137584_cov_6.95087_ID_19	fig|857335.5.peg.249	NODE_11_length_137584_cov_6.95087_ID_19_69642_70715	69642	70715	+	putative membrane protein		atgaagattgcccgcgcgtatctgcgccgcgagatcctggcggccgtggcgatggtgttgctggccttcctgtgcctgttcgccttctttgatttcctggccgagcttgaggatctcgggcgcggtgactaccgcctgaagcactccctgatcttcgtgctgttgtccattcccagtcgggcttacgaagtcatgcccatcgccgtgctgatcggctcgctgtatgcgctgacgcagtttgcacgcaactccgagctaaccgtgctgcgcgccgccggggtgtcgaccatggggctgatgctgacgctgatgcagatcggtgtgatctttgtggcgagcacttacgtgcttggcgagtatgtggcgccgccactcgagcgtgtggcgcagaaatggcgc…	MKIARAYLRREILAAVAMVLLAFLCLFAFFDFLAELEDLGRGDYRLKHSLIFVLLSIPSRAYEVMPIAVLIGSLYALTQFARNSELTVLRAAGVSTMGLMLTLMQIGVIFVASTYVLGEYVAPPLERVAQKWRLRSLNSTVRNDLSSGVWLRDGRLFVNVQRVSADSGLEGVKIFDFDTDYKLTSINVAERGEYSPQQGWLLSGVTQTRFLGDRTELLQMPELRWASELTPEMISVVMVNPERMSIARLYEYTRFLAANAQRSGRYEVALWKKLAYPFVSLVMMGLALPFALGNQRSVNVGARVLTGVMLGIGFYLLNALFSNLGVINNWPALMSAITPSVFFLLLAVALMWMVDRR
NODE_11_length_137584_cov_6.95087_ID_19	fig|857335.5.peg.250	NODE_11_length_137584_cov_6.95087_ID_19_71285_70728	71285	70728	-	Probable transmembrane protein	FIG01276430	gtggtcgaactcgccagcctgcgccggcgtctggcctgccttctttacgaaagcctgctgctgctcggcatctttgctgccggcttcctgctgccacaggtcatattcggcatgctcgcaaacctggcgctccccggctgggtgctgtggctacatctgttcgtactgttcgggatctatttcgtgtggctctggcgacgcaatggtcagaccctggcaatgcagacctggcaactgcagctagtcacccaggaaggcaaaccacccacactggcgcaatgcttgctccgctacgccctcgcctggcctgccatgctgctgctgggtagcggcctgggcctgatatggacggcattcatcgaccgcgaccgccaattcccgcacgaccgcctggccggc…	MVELASLRRRLACLLYESLLLLGIFAAGFLLPQVIFGMLANLALPGWVLWLHLFVLFGIYFVWLWRRNGQTLAMQTWQLQLVTQEGKPPTLAQCLLRYALAWPAMLLLGSGLGLIWTAFIDRDRQFPHDRLAGTRIVFNPRAPGSRLSVRSKSVAGGVKPAAGRRKQAREPRSRLRGKTINSCQT
NODE_11_length_137584_cov_6.95087_ID_19	fig|857335.5.peg.251	NODE_11_length_137584_cov_6.95087_ID_19_71836_71297	71836	71297	-	Probable transmembrane protein		atggctggcagagtcctcacagtactgatcctctgtttcctggcagcccacgccgccgcgcaggcgcgcacgggcgcatccggccatcagccggactggagcgagctgaacgcgcaacagcgtacggccctcgcccctttgtccaaggagtggaacaatctttccgccgatcgccgccagcgctggctgggcattgcacgccgctatccgaagatgaacgacgtagcccaggcacgcatccaggatcgcatgcgcgaatgggtaatgctctccccgctgcaacgtgacatggcgcgcgagcaattcctgcaactgcagcaacgcctggagttgccggcagacctggatctgaatgccaaatggcaggagtactctgcactcccggccgaagaacgcagc…	MAGRVLTVLILCFLAAHAAAQARTGASGHQPDWSELNAQQRTALAPLSKEWNNLSADRRQRWLGIARRYPKMNDVAQARIQDRMREWVMLSPLQRDMAREQFLQLQQRLELPADLDLNAKWQEYSALPAEERSRLRGKLPRIAALRAINPAAGQRPRLPGQTVPVDSQSRFGLPVLPLP
NODE_11_length_137584_cov_6.95087_ID_19	fig|857335.5.peg.252	NODE_11_length_137584_cov_6.95087_ID_19_72201_71809	72201	71809	-	Probable transmembrane protein		atgaacatgcccgaaacgaacgaacaagcgctcggccagctcgtgcgtcatcacctgaacacaggcaacgccacgctgtcgggcgacaccactgaacgcctttttgccgcccgccaaaccgccctggcgcggcacgccgcgctcggcgccgaattggcgaccgtcagcgctgggcggcacgtgctggtctggtgtgcagaccaggcgcgtcccgtcctgtttgcgctggggctggtcgctgcattggctgtcagcaatctgtggctcgcaccgcaacaaccggcctccgacctggaagccatcgacacggccctgctcaccgacgagctgccgcttgacgcctacctggacagcggcttccgcgcatggctggcagagtcctcacagtactga	MNMPETNEQALGQLVRHHLNTGNATLSGDTTERLFAARQTALARHAALGAELATVSAGRHVLVWCADQARPVLFALGLVAALAVSNLWLAPQQPASDLEAIDTALLTDELPLDAYLDSGFRAWLAESSQY
NODE_11_length_137584_cov_6.95087_ID_19	fig|857335.5.peg.253	NODE_11_length_137584_cov_6.95087_ID_19_72725_72198	72725	72198	-	DNA-directed RNA polymerase specialized sigma subunit, sigma24-like	FIG00003425	gtggagcggcgtgtcttccgccaggccctgttcgcgctgcgcaacgaggaaacggcgctggacgtcgtgcaggactccatgctgcgcctggcagagaaatacagccatcggcctgcagaggagctgccgatgctgttccagcgcatcctgcagaacgccatccgtgaccagatgcgcagggccaaggtacggagtctatggaccacggtgctgtcggccttcggtcataatgaggacggcgaagacgccgatccgctcgatagtctggcagtggaggacacggggcttctccccggcagcccgcatgaacggctcgagcaggcacagatcatgcgggtaattgaggaggaaatcgcacgtctgcccgcgcgtcaacgggaagccttcctgatgcgttac…	MERRVFRQALFALRNEETALDVVQDSMLRLAEKYSHRPAEELPMLFQRILQNAIRDQMRRAKVRSLWTTVLSAFGHNEDGEDADPLDSLAVEDTGLLPGSPHERLEQAQIMRVIEEEIARLPARQREAFLMRYWEELDIAETAAAMGCSEGSVKTHCSRATHALAAALRAKGIQL
NODE_11_length_137584_cov_6.95087_ID_19	fig|857335.5.peg.254	NODE_11_length_137584_cov_6.95087_ID_19_72894_74576	72894	74576	+	Acetolactate synthase large subunit (EC 2.2.1.6)	FIG00136692	gtgaggtgcctgcaggaagaaaaggtcgactatgtgttcggctatcctggcggtgccgtactcttcctgtatgacgagctgttcaagcaggacaaggtccgtcacgtcctggtgcgtcatgagcaggctgccgtgcatgcggcggatggctatgcgcgttcgaccgagaaggttggcgtggcgctcgtgacctccggtccgggggcgaccaatgccgtgaccggcatcgcaacggcctacatggattcgatcccgctggtggtgatcagcggacaggtgcccacggcggccatcggcctcgatgcgttccaggaagtcgatacagtgggaatcacgcgtccgtgtgtgaagcacaacttcctcgtcaaggacgtgcgtgatatcgccagcacgctcaag…	MRCLQEEKVDYVFGYPGGAVLFLYDELFKQDKVRHVLVRHEQAAVHAADGYARSTEKVGVALVTSGPGATNAVTGIATAYMDSIPLVVISGQVPTAAIGLDAFQEVDTVGITRPCVKHNFLVKDVRDIASTLKKAFHIASTGRPGPVLVDIPKDVTAQRCEFEYPASVSMRSYNPVVKGHSGQIRKAVQQLLEARRPMIYAGGGVILSNASEKLTRLARLLNYPVTQTLMGLGATPSSDPQFVGMLGMHGTYEANMGMHYCDVLLAIGARFDDRVIGNTAHFAQEQRKIIHVDIDPSSISKRVKVDVPVVGDVGEVIDEMIACLEQMQARPDAGHLDAWWRQIGEWRSRDSLGYRNSDEIIKPQFVVQKLWEVTAGDAFVATDVGQHQMWAAQYYKFDK…
NODE_11_length_137584_cov_6.95087_ID_19	fig|857335.5.peg.255	NODE_11_length_137584_cov_6.95087_ID_19_74595_75086	74595	75086	+	Acetolactate synthase small subunit (EC 2.2.1.6)	FIG00000433	atgcgacacgtcctctcccttttgctcgaaaacgaagccggcgcgctctcgcgcgtttccgggctgttctcttcccgtggctacaacatcgaatccctgacggtggctccgaccgaggatgcctcgatgtcacgcatgaccatcgtgacctccggatcggatgacgtcatcgagcagatcaccaagcagctcaacaagctcatcgacgtggtcaaggtcgtcgatgtctccgaggcgccgcacatcgagcgcgaactgctgctggttaaggttcgtgcggtgggggctgcgcgtgaggagatgaagcgcatgtccgacatcttccgggggcatatcgtcgatgtttccgagacgagctacgtcatcgagctcaccggcaatcaggacaagctggattcc…	MRHVLSLLLENEAGALSRVSGLFSSRGYNIESLTVAPTEDASMSRMTIVTSGSDDVIEQITKQLNKLIDVVKVVDVSEAPHIERELLLVKVRAVGAAREEMKRMSDIFRGHIVDVSETSYVIELTGNQDKLDSFLAALDADLVLETVRSGVCGIGRGERVLKV
NODE_11_length_137584_cov_6.95087_ID_19	fig|857335.5.peg.256	NODE_11_length_137584_cov_6.95087_ID_19_75167_76183	75167	76183	+	Ketol-acid reductoisomerase (EC 1.1.1.86)	FIG00000244	atgaaggtttattacgacaaggacgccgacctctccctcatcaagggcaagcaggtcaccatcgttggttacggttcgcagggccatgcccatgcgcagaacctgcgtgactccggcgtcaatgtgactgtcggtctgcgcaagggcggtgcatcctgggccaaggctgaagccgctggtctgaaggtcgccgagatcgccgatgccgtgaagggcgcggatgtggtcatgatcctgctgccggatgaaaacatccccgtcgtctataagcacgatgtcgagccgaacctgaagccgggctctgcgctggcctttgcccacggcttcaacgtgcactacaaccaggtcgtgccgcgtgccgatgtggacgtgatcatgattgccccgaagggcccgggc…	MKVYYDKDADLSLIKGKQVTIVGYGSQGHAHAQNLRDSGVNVTVGLRKGGASWAKAEAAGLKVAEIADAVKGADVVMILLPDENIPVVYKHDVEPNLKPGSALAFAHGFNVHYNQVVPRADVDVIMIAPKGPGHTVRSEFLKGGGVPSLIAVYQDNSGRAKDIALSYAAANGGTKGGVIETDFREETETDLFGEQAVLCGGAVELVKAGFETLVEAGYAPEMAYFECLHELKLIVDLMYEGGIANMNYSISNNAEYGEYVTGPEVINAQSKDAMRAALKRIQTGEYAKMFILEGRTNYPSMTARRRLTAAHPIEQVGSQLRAMMPWIAKNKLVDQSKN
NODE_11_length_137584_cov_6.95087_ID_19	fig|857335.5.peg.257	NODE_11_length_137584_cov_6.95087_ID_19_76298_77095	76298	77095	+	CDP-diacylglycerol--serine O-phosphatidyltransferase (EC 2.7.8.8)	FIG00000775	atgagtgagcagcttcccgaagcagtgtccggcgaggacgaatcggtccaccgttcgcgggcgatctacatcctgcctaacctgtttaccagcgcagcgctgttctgcggcttctatgccatcgtgcaggccatgaacgaccgtttcgatctggcggccgtggccattttcattgccatggtgctggatggcctggatggccgtgtggcgcggctcaccaacacgcagagcgcgttcggtgccgaatatgattccttgtccgacatggttgcctttggcgtggcgcctgcgctggtgatctacgagtggtcgatgaaggatctgggcaagctgggctggatggccgctttcctgtattgcgtctgtgccgccctgcgcctggcgcgtttcaacaccaat…	MSEQLPEAVSGEDESVHRSRAIYILPNLFTSAALFCGFYAIVQAMNDRFDLAAVAIFIAMVLDGLDGRVARLTNTQSAFGAEYDSLSDMVAFGVAPALVIYEWSMKDLGKLGWMAAFLYCVCAALRLARFNTNIAVVDKRYFQGLPSPAAAALVTGFIWIMIDNGETGLDHLLGIPVPYLAWFFAVFAGLSMVSNVLFWSGKSINLRRAVPFSVALAFIAVLLAVHYDPPVMLFLLFVTYAMSGYVMSLWRVLRRYRAQRGARPS
NODE_11_length_137584_cov_6.95087_ID_19	fig|857335.5.peg.258	NODE_11_length_137584_cov_6.95087_ID_19_77115_78659	77115	78659	+	2-isopropylmalate synthase (EC 2.3.3.13)	FIG00000157	atgtccgaccatcttgtcattttcgacaccaccctgcgcgacggggagcagagtccgggcgcagcgatgacccgcgatgagaagatccgcatcgcgcgtcagctggaaaagatgcgcgtcgatgtgatcgaggccggttttgccgcagcatcgaacggtgatttcgaatccgtgcgtgcagtagccgaagccgtcagggaatccacggtctgttcattggcccgcgccaacgagaaagacattgcccgtgcgggggaggccatccagcctgccgctgcggggcgtatccatacgttcatcgccaccagcccgatccacatggagaagaagctgcgcatgacgcccgatcaggtcgtcgagcaggcggtgaaagccattggctgggcgcgccaatacacc…	MSDHLVIFDTTLRDGEQSPGAAMTRDEKIRIARQLEKMRVDVIEAGFAAASNGDFESVRAVAEAVRESTVCSLARANEKDIARAGEAIQPAAAGRIHTFIATSPIHMEKKLRMTPDQVVEQAVKAIGWARQYTDDVEFSAEDAGRSELDFLCCVFEQVIKAGAKTINVPDTVGYNLPEQFAGLVRSLLERVPNADKVVWSVHCHNDLGLAVANSLAAVRAGARQVECTVNGLGERAGNASMEEVVMAVRTRGDVFPVTTRIDTTQIVPASKLVSQITGYPVQPNKAIVGANAFAHESGIHQDGVLKHRETYEIMRAEDVGWTTNRLTLGKLSGRNALRSRLQELGFVIESEEQLNAAFARFKELADKKQEIFDEDLQALMSDEVVTPEQERIKLISLRV…
NODE_11_length_137584_cov_6.95087_ID_19	fig|857335.5.peg.259	NODE_11_length_137584_cov_6.95087_ID_19_79016_78660	79016	78660	-	Probable transmembrane protein	FIG01276430	atgtctcctgctgcccgttcggcccaaaaggccacactcgtctgcctgctgttactgatcggcctggtggtggccatggaactctggctggccccgctgcggccgggcggctcctggctggtgctgcgcgtactgccgttgctggcagcattgcgcggcgtattgcatggacggcgctacaccagccaatggttgagtctggcggtctggctgtacttcacgttcggagtgatccgtgcaagtacggacaccggcctgtcggcactcgccggtggcgtggaaaccctggtggcactggcattgttcgtggcctgtgcagcccacgcgcgcctcagtgcgggcacgccaaagccctga	MSPAARSAQKATLVCLLLLIGLVVAMELWLAPLRPGGSWLVLRVLPLLAALRGVLHGRRYTSQWLSLAVWLYFTFGVIRASTDTGLSALAGGVETLVALALFVACAAHARLSAGTPKP
NODE_11_length_137584_cov_6.95087_ID_19	fig|857335.5.peg.260	NODE_11_length_137584_cov_6.95087_ID_19_79101_80345	79101	80345	+	Inner membrane protein YihY, formerly thought to be RNase BN		atgcaattgatccgtcgcctgacccagctgagacctccggccgactctcccctgtaccagctgtcgctgctggtgctgtacaagttccgtagcgtgcgcgtgatgcagaccgccggggccttgacctacaccacactgctgtcactggtgccgatgatcaccgtggtgctggcggtgatgcggcagttctctcccttcatgaaacttggcgaggggctgcggggattcctgctcgcgaatctgctgcccgagcgtgccggcaaggtagtggcaacctatgccctgcagttctccgagaaagcctccagtctaactgtcgtcggagcaggcttcctgttgctgaccgctgtaatgcttctctccaccatcgaccgcaccatcaacagcatctgggccgtg…	MQLIRRLTQLRPPADSPLYQLSLLVLYKFRSVRVMQTAGALTYTTLLSLVPMITVVLAVMRQFSPFMKLGEGLRGFLLANLLPERAGKVVATYALQFSEKASSLTVVGAGFLLLTAVMLLSTIDRTINSIWAVRKPRAWYVRFPVYWVALTLGPVLFAAGVAATSEVVSVSMGVVQQDGWLRSMIDRLATAALLSALCAYMFHVIPNRRLVLWHGVIGGLVAGFGVMLVQRMFGFYISRLPNFTLIYGTFSVLPIFLIWVYLTWLTILLGATVAAVLPEFRARHERLPDTPAGQLLAALYLAQALIAAQQAGRAVSRSRLAQACRRSPEQTEAMLLAMQQAGWVLRSENEAWALSIPGDRLQLGALHDCLVLQLQAGGEHAAGLNAADQLLLQQAREQM…
NODE_11_length_137584_cov_6.95087_ID_19	fig|857335.5.peg.261	NODE_11_length_137584_cov_6.95087_ID_19_81826_80333	81826	80333	-	hypothetical protein		atgcccagccagcccacctcccagtccgacccgacccgtgccatcctggaatggttggccaacgcgcccgcatcggacctgagcgatgagaccggtacgctgctgacacaactggatgcactgcacagcccgacggtcagcgccgggcaattccatagctgcatggagctcttctacggccgggctctcgcgctgggcatcgcgcaccgacacgcggcccgcgaactcacccacccgctgccggatgcagttctggcccgcgcccgcctcctgggggacggtttgcggcgcgtggcgtcagggttcgagcgggtactcaccgacgcggattcccgtgcagggacgccacaaaaacgtttcaacgaagcgacttcagcgcgcgcactgcgcatgcttggc…	MPSQPTSQSDPTRAILEWLANAPASDLSDETGTLLTQLDALHSPTVSAGQFHSCMELFYGRALALGIAHRHAARELTHPLPDAVLARARLLGDGLRRVASGFERVLTDADSRAGTPQKRFNEATSARALRMLGEHFLTMSQAGMEPDPDIWRTAYRLYALSRVDNGSLEPAASPSETALLAYKRLLGMVALEPLSLTPAELEWSADYLTRICAQLHVQEIRPTVMDSSWYWLDPQGNAEPQACVRREAPEGRSLLFFSTTGLARHAGELLARHEDGHESGELARTPEFPGVRPVALLDRLRQHWSLPPRRELPRRRQDYKVEACVGLSTIWNVLRNGVAHDPTLVSHWTVLNESPGGFAIMHLQGHTDGLAAGMAVALRRNPADAWNLCVVRWLRSELA…
NODE_11_length_137584_cov_6.95087_ID_19	fig|857335.5.rna.6	NODE_11_length_137584_cov_6.95087_ID_19_81993_82065	81993	82065	+	tRNA-Lys-TTT		gggtcgttagctcagttggtagagcagcggacttttaatccgttggtcgcaggttcgaatcctgcacggccta
NODE_11_length_137584_cov_6.95087_ID_19	fig|857335.5.rna.7	NODE_11_length_137584_cov_6.95087_ID_19_82099_82171	82099	82171	+	tRNA-Lys-CTT		gggggtatagctcagttggtagagcagttgactcttaatcaattggtcgtaggttcgaatcctactgccccca
NODE_11_length_137584_cov_6.95087_ID_19	fig|857335.5.peg.262	NODE_11_length_137584_cov_6.95087_ID_19_82423_83949	82423	83949	+	diguanylate cyclase/phosphodiesterase (GGDEF & EAL domains) with PAS/PAC sensor(s)		ttgcgtgcaagactggcgctgcttttcgggctcatctccctggctatcggcttgccgacgtacctgtacatcagcggtgtacatcgttctcagctgatttctgatcggcaggcctcgctggatgcgttggccagcgcagcggcgaccgttctggcggaaaatctggtcgaacgacgccgggaggtcgaactgctgacgcagacaccattgttccgtcaggcgccgttttcttcgtcagaattccgacgtagcctggagcgtctcaggctttcatatccccactattcctggatcggtctgaccgatgttgagggcgaggtcaaggttgcgacctccaatcatctggttggcgttgcggtgcagagccgcccctggttcgtgcatgggaaggagcgggtt…	MRARLALLFGLISLAIGLPTYLYISGVHRSQLISDRQASLDALASAAATVLAENLVERRREVELLTQTPLFRQAPFSSSEFRRSLERLRLSYPHYSWIGLTDVEGEVKVATSNHLVGVAVQSRPWFVHGKERVFVGDVHEAVLLAKLLPPENRDQPVRFIDFASPVLDDEGNLRGVLGAHAYWRWAGSVLSVVIPPDAAKSALEVFIVNQDGRVIYPEGGVARSVSSMPAGRARATPVVRHEWNDGVEYLTAAAPVAEPVSHGGLGWKVYIRQPREVVLADVKRLQHTILSATSIAAVLLLLLGWIGAESISRPVRQLIVFARRIERGDENASFATKGGITELRQLARALSSMAATLLARRKALEASNRDLELKVAERTEKLQQLNQTLERLAHTDALT…
NODE_11_length_137584_cov_6.95087_ID_19	fig|857335.5.peg.263	NODE_11_length_137584_cov_6.95087_ID_19_84251_85459	84251	85459	+	Macrolide-specific efflux protein MacA	FIG00001179	atgatgcgaaagacaggctggttgcggccgcgcaatctggtactgaccgttgtgggcgtgcttgtgctggcggcgattgccgtctggcgtctgacgccaccaccaccgccacagatgctgacgacgccggtcacccgggccgatctcgaagatgcagtgctcgccacgggtagcgtagaggcctacaagctggtcagtgtcggtgcgcaggtctccggccaggtcaaatccctcaaggtccagctgggcgatcaggtgaaggcaggccaattgattgccgagatcgattcgttgagccagcagaattccctgcgcgacgccgaggcggcgctcaagagcacgcaggcccaattgctggtcaagaaggcgaccttgaaacaggctgaactggcctatgag…	MMRKTGWLRPRNLVLTVVGVLVLAAIAVWRLTPPPPPQMLTTPVTRADLEDAVLATGSVEAYKLVSVGAQVSGQVKSLKVQLGDQVKAGQLIAEIDSLSQQNSLRDAEAALKSTQAQLLVKKATLKQAELAYERAGDLLAQDAGSRESFETAEATLDATRAEIVALEAQIDQGRISVDTARLNLGYTRIVAPMDGTVVAVVTEEGQTVNANQSTPTIIKLARMDMVTIKAEISEADVTRAAPGQRVYFTILGEPDHRYETTLRAIEPAPESISTDSSTTTTTTTSTTSTAIYYNGLLDVPNPDGKLRISMTTQVRIVLADAKNALSIPATALGERGPQGNYLVQVLGSEGRPEPRRVRIGLNNAVTAQVLEGLAEGERVVLGEAAQGSSGSSSRRPMGP…
NODE_11_length_137584_cov_6.95087_ID_19	fig|857335.5.peg.264	NODE_11_length_137584_cov_6.95087_ID_19_85473_87422	85473	87422	+	Macrolide export ATP-binding/permease protein MacB (EC 3.6.3.-)	FIG00001667	atgagcattccgcttcttcaattgcgcgacctgtgtcgcgactatccggctggtgaagaccgtctgcgtgtgctggatcacgtgaatctggacatccatgcgggcgagatggtcgccatcgtcggcgcttccgggtctggcaaatccacgctgatgaacatcctcggttgcctggatcggcccagcgaaggcagctatcgcgtcggtggtcgtgaaaccggcgcactcgagccggacgagctggcgcaattgcgccgcgagcatttcggtttcatcttccagcgctaccatctgctggcggatcttgatgcccagggcaacgtggaaatccccgcgatctacgccgggcgggatcaccgcgagcgtcatgcgcgtgcgcgccagttgctggagcgcctg…	MSIPLLQLRDLCRDYPAGEDRLRVLDHVNLDIHAGEMVAIVGASGSGKSTLMNILGCLDRPSEGSYRVGGRETGALEPDELAQLRREHFGFIFQRYHLLADLDAQGNVEIPAIYAGRDHRERHARARQLLERLGLSDRLHHKPGQLSGGQQQRVSIARALMNGGQVILADEPTGALDSHSGQEVMAVLKALHAEGHTIILVTHDMEVARHAQRIIEIRDGLIIADRGQVPAREIAGKSVAQAPTRSWLALRDRLGEALRMALVAMVAHRMRTFLTMLGIIIGIASVVSVVALGQGTRARILKDISAMGTNTIDIYPGAGFGDMRSGGVRTLVSADAEALAGQSWVDSVTPSVSSSKTLRYRNVSVTGNVNGVGAQYFRVRGLEFAEGHSFDADSEQRLA…
NODE_11_length_137584_cov_6.95087_ID_19	fig|857335.5.peg.265	NODE_11_length_137584_cov_6.95087_ID_19_87426_88790	87426	88790	+	RND efflux system, outer membrane lipoprotein CmeC	FIG00006235	atgcgcaaccatcacctttccgttttcgccggctgcttgttgttatccgcctgtgccagtctcgtgcgcaccgaatacacgccaccggtcatggatctgcccgccaattggcagaatgccgacgtggccatcgcggggcatgtggaggatgcctggtggcaggccttccaggatccacggctggacgattacgtggcgctggcgctggcgcgcaataccgatctggcctctgcagcggtcagcttgcgccgcgcacgtctgaacgccggactggctgacgacgcgctgcgcccgcagccaggcgccagcgccgggcagtccgtgagccggaatctggacggcggcggcatcagccgcagctactcggccaccgttacgctgagttgggaggccgacttc…	MRNHHLSVFAGCLLLSACASLVRTEYTPPVMDLPANWQNADVAIAGHVEDAWWQAFQDPRLDDYVALALARNTDLASAAVSLRRARLNAGLADDALRPQPGASAGQSVSRNLDGGGISRSYSATVTLSWEADFWGKLASARDAAEWEARASAEDLENTRLTLIGDTARAYWQLGYLNQRVVLSAQSVGYLETTRDLAQRRHAAGAVSRLDLLQAEQSLATQLASHAQLLQQREEARTSFRLLFSGALPAALEEPQVLPESDLPTLPAELPASLLQRRPDLRAAELRLRGTLASGDETRLSYYPGFSLTGSLGSSSDRLRDVLSNPVGALAGELTLPFLRVREMQLKTDVARADYELAELAFRKSLYAALGDVENALSARSQYVLSHRLLARSLVLAREV…
NODE_11_length_137584_cov_6.95087_ID_19	fig|857335.5.peg.266	NODE_11_length_137584_cov_6.95087_ID_19_90336_88804	90336	88804	-	D-alanyl-D-alanine carboxypeptidase (EC 3.4.16.4)	FIG00561498	atgaagaagcctcgcataggggaaaggaagacgggcatcctgccacgcttgtgcaatgccgcacaaaatttgtgtggccgccacgcctacaatgcgccgatgaaaatcctccgccccatgctgctggcgttgctcgccggcgtgtctggcgccggccacgccgcgctgcctgaatctctggctcggcctgctcgggaagctggcctgccgcctggcagcatcgctctgtgggtcgcccccgcaggcagtagccaggccaccctgcagcacaacgccagcctgcccatgaacccggcctcggtgatgaaactattgaccacgcaggctgcactggagcatctgggctccagctacaactggcagacgaccgcctatttgcgtggcgccttgcgcgaggat…	MKKPRIGERKTGILPRLCNAAQNLCGRHAYNAPMKILRPMLLALLAGVSGAGHAALPESLARPAREAGLPPGSIALWVAPAGSSQATLQHNASLPMNPASVMKLLTTQAALEHLGSSYNWQTTAYLRGALREDGILLGDLGIRAGGDPFLTWDRLGQWLRDWRTRGLREIRGDIVLDERLFAPQPATPLPFDDSPHRAYNADPAPFLVNFGALSLRLEPGIPGQGVRATALQPATPLRLINRLQSMAGACPDWRNALRADIAPEGTGLRVTLDGRMPGSCGERIFNLRAGDNLAWAETAIRTQWSELGGRWRGRLVRGEQSPDAAAFSTWASPPLSDVLRDMDKWSNNVVARQVFLSLGAPDGVAWSVEHSRAWLRAWMPSQGLDPAQWVVDNGSGLSR…
NODE_11_length_137584_cov_6.95087_ID_19	fig|857335.5.peg.267	NODE_11_length_137584_cov_6.95087_ID_19_90335_90898	90335	90898	+	Glutathione S-transferase (EC 2.5.1.18)	FIG00004065	atgctgaccttgttccatgcgccaggcacttgctcactggcttccttgatcacgctggagcacgtcggcgcggcattcacgctccgcaagctcgacttctcgcgcaacgaacagcgcagccccgagtatctggcgctcaatcccaacggccgcgtgcctgccttgcagaccccgcgcggcgtgctcacagaaacgccggcgatcctgctttatcttgcgcagacgcatccggccgccagcctggcgccactggataattcgtttgcattggcgcacgcccatcgcttccgcggcagccgctgggcggacgatcccgcagccatcgaggccatgaaacagaaggtgccgcagagcgtgggggcctgcttcgcgctggtcgagggattgctgccggtggat…	MLTLFHAPGTCSLASLITLEHVGAAFTLRKLDFSRNEQRSPEYLALNPNGRVPALQTPRGVLTETPAILLYLAQTHPAASLAPLDNSFALAHAHRFRGSRWADDPAAIEAMKQKVPQSVGACFALVEGLLPVDGWIFGAQPGVSDFYLFTVAQWLEGDGLDPTAYPKVIAHRERVRALPAVQKALAA
NODE_11_length_137584_cov_6.95087_ID_19	fig|857335.5.peg.268	NODE_11_length_137584_cov_6.95087_ID_19_91771_90902	91771	90902	-	LysR family transcriptional regulator YeiE		atgaacctgcatctgctccgcattttcgccgccgtcgtcgaacagaaaagcttctcgcgtgccgccgaggtgcagggtgtgagccagcctgcggtatccaaggcagtgcgtgagctggaggatcagctccaggtggtgctgctggaacgcggtggccgcagcttccgcccctcggaagccgggcagatgctctacaagtacgcacgcggcatcttcgccatggagcgtgccgcggtggaagcggtacaagcctattccgagcttgaacgcggcaacctcaccatcggcgccagcaccactatcgcagcctactggttgccaggtttgattgccgatttcgccaaacgctatcccggcatccgcgtccgcctgctctcgggcaacacgcgccaggttgcc…	MNLHLLRIFAAVVEQKSFSRAAEVQGVSQPAVSKAVRELEDQLQVVLLERGGRSFRPSEAGQMLYKYARGIFAMERAAVEAVQAYSELERGNLTIGASTTIAAYWLPGLIADFAKRYPGIRVRLLSGNTRQVAQWLIDCDVDVALVEGGIEDERVEVRPWRRERMLVIAAPDALPAGRALEAGELAGQLWLLREPGSGSRGVVEHELARLGIQPARTLEAGGNEILVQMAAAGLGVAMVPEAAAADAIALGRVTNIPLRSGEISRELFRLRLPRRPVSQGALAFEAMIG
NODE_11_length_137584_cov_6.95087_ID_19	fig|857335.5.peg.269	NODE_11_length_137584_cov_6.95087_ID_19_91921_92832	91921	92832	+	PfkB		atggcctacgacaccatcatggtgttcaattcccagttcaagaaattcatcctgcccgagcagatccatatcctgaacgtttccttcctggtgcccgagatgcgccggaattttggcggctgcgcgggcaacatcgcctattcgctgaagctgctgggaggcgagccgctgatcatggcgacagtcggggatgatgccgatgcctatctgcggcgcctggaatccttgcagatcagcgcgcggcatgtgcggcgcgtgcccgagacgtttactgcgcaggccttcatcaccaccgatctggacgataaccagatcacggcattccacccgggcgcgatgagtcagtcgcacctgaatcatgtgcgcgatgcccagggcgtgcagctgggcatcgtttcg…	MAYDTIMVFNSQFKKFILPEQIHILNVSFLVPEMRRNFGGCAGNIAYSLKLLGGEPLIMATVGDDADAYLRRLESLQISARHVRRVPETFTAQAFITTDLDDNQITAFHPGAMSQSHLNHVRDAQGVQLGIVSPDGREGMLQHARGFAEAGIPFVFDPGQGLPLFSGEDLLGLLDLATWCTLNDYEARLVCDKTGLPIEALAERVDGLIVTLGAEGSRIHAGGRCVDVSAVPAQNVVDPTGCGDAYRGGLLYGLSQGWSLERAARLASTMGALKIAHRGGQDYTASREDIAAIHAAAYGERPW
NODE_11_length_137584_cov_6.95087_ID_19	fig|857335.5.peg.270	NODE_11_length_137584_cov_6.95087_ID_19_92844_93344	92844	93344	+	Outer membrane lipoprotein		atgatgaagaaaaagctcgtagcgctggccctggtggccggggccctctccttgactggctgcgtgcgcagtctggcgggtgacacctattcacgcgaggaggcgcaacgcccgatctccttccgtgaaggcaccttgctggaggtgcgcaaagtccgcctgcagggcaccaacagcggtgtcggcaccgcgtcgggggctgtcatcggcggcgtggccggcagcggtgtgggtgccggacgcggtgcggtggtcggcgctgtggtcggtgccgtcgtcggcggcctggccggagcagtctccgaagaaggcctgacacgcgaggaggcctgggagctcactgtccgcatgagtggtggcgagtcgatcgtgatggtacaggagatcggcaaggaaaac…	MMKKKLVALALVAGALSLTGCVRSLAGDTYSREEAQRPISFREGTLLEVRKVRLQGTNSGVGTASGAVIGGVAGSGVGAGRGAVVGAVVGAVVGGLAGAVSEEGLTREEAWELTVRMSGGESIVMVQEIGKENFVVGERVRVLQSQGKTRVSPASAQTPSDNRASF
NODE_11_length_137584_cov_6.95087_ID_19	fig|857335.5.peg.271	NODE_11_length_137584_cov_6.95087_ID_19_94425_93613	94425	93613	-	SCP-like extracellular protein domain		gtggccggttgcagtgtcggtgcgctcaacgacagcgaacgcacggcggtgctcgcccgcctcaacggaatccgcgaccggcatggtctgccaagcgtcagttacgacagtagtgatgattcggcagccgcccaggccgcgatgtacatggtggccaaccggagcctgacccacacgccaagcggtaacggcaactgctacaccagtgaagcctcccggctggccggcaccagcaacctctactacagcagcgcctggggcagcagcacgctatcgcaggccagcacggaagccatccgggcctacctgatcgacgagaacgtctcttcgctgggacatcgccgatgggtcctgttcccgttcatgggggccaccgccttcggccgcgtagacgatgtc…	MAGCSVGALNDSERTAVLARLNGIRDRHGLPSVSYDSSDDSAAAQAAMYMVANRSLTHTPSGNGNCYTSEASRLAGTSNLYYSSAWGSSTLSQASTEAIRAYLIDENVSSLGHRRWVLFPFMGATAFGRVDDVSGSTSYMASTLRTIGGERTSVSSMAPDFVAYPHGDYPVSDFAKNWYLSFSAIASKTDRWANGSDHVSFANATIAVSDASGNSLSASDVSHDYSGYGLANSLQWKLDSLQDNVTYTVRIDNVLVNGGTRNYEYSFRLQ
NODE_11_length_137584_cov_6.95087_ID_19	fig|857335.5.peg.272	NODE_11_length_137584_cov_6.95087_ID_19_94382_94498	94382	94498	+	hypothetical protein		gtgcgttcgctgtcgttgagcgcaccgacactgcaaccggccacgctcggcaacgtggcgtatacgctggcactgctgacgctggatgcccgttggctgctgctggacgaggattga	MRSLSLSAPTLQPATLGNVAYTLALLTLDARWLLLDED
NODE_11_length_137584_cov_6.95087_ID_19	fig|857335.5.peg.273	NODE_11_length_137584_cov_6.95087_ID_19_94910_94773	94910	94773	-	hypothetical protein		atgcgtgggcatgggcctgctcagcgacagcgcgaatggtttgaccgcgcctggcgtctggcccgctatgccctggccatcgcactggtgttcttcgccctgctgatcttcgagcgcctgatcgcaccactggtatga	MRGHGPAQRQREWFDRAWRLARYALAIALVFFALLIFERLIAPLV
NODE_11_length_137584_cov_6.95087_ID_19	fig|857335.5.peg.274	NODE_11_length_137584_cov_6.95087_ID_19_95889_94969	95889	94969	-	UDP-3-O-[3-hydroxymyristoyl] N-acetylglucosamine deacetylase (EC 3.5.1.108)	FIG00000615	gtgatcaaacagagaaccctgaaagccatcgtccgcgccaccggggtcgggctacacggcggcaaacgcgtcgaaatggccctgcgacctgccgcgcccgataccggcatcatcttccgccgtgtcgatctcgacccacccgtggatatgcccgccaacgacccctattccgtggtcgacacccgcatgtgctccggcctgcagaaaggcaatgccaagatcggcacggtggagcatctgatgtccgccctggccggcctcggtgtggacaactgctatgtcgatatcgacgcgcccgagatcccgatcttcgatggcagcgcagcgcccttcgtatttctgatccagtccgtcgggctggaattccaggacgcgcccaaacgcttcctgcgcgtaaag…	MIKQRTLKAIVRATGVGLHGGKRVEMALRPAAPDTGIIFRRVDLDPPVDMPANDPYSVVDTRMCSGLQKGNAKIGTVEHLMSALAGLGVDNCYVDIDAPEIPIFDGSAAPFVFLIQSVGLEFQDAPKRFLRVKKAVEYVEGDKTVRLEPHDGFKLTFAIHFNHPAIDGTGTKVTIDFAAQNYVRDVARARTFGFVQDLEALIGMGLAKGGSLDNAIVLDEYRILNPDGLRYSDEFVKHKVLDAIGDLYLCGHPLLAHYVANKSGHALNNQILRVLLEDKEAWEIVSFEDDAQVPVPLRGQLELQAA
NODE_11_length_137584_cov_6.95087_ID_19	fig|857335.5.peg.275	NODE_11_length_137584_cov_6.95087_ID_19_96034_96852	96034	96852	+	COG1355, Predicted dioxygenase	FIG00212443	atggctttccacgctgttcgccccgccatggtggccgggcatttctatcctgtcgatcctcaagcgttgacggcgcagatccagggcttgctggcccatgccgttccgtccgatgcgctggtgccgcccaaggccttgatcgtcccgcatgctgggtatctgtattccggtccgatagcggccagcgcctatgcgcaactgcagccctggcgcgatgtcatccggcgtgtagtgctgctgggccccagtcatcatgagcatttcccgggcgtggccgtggccggcaccggcgccttcgcgacccccttgggcgaggtgcccgtggaccacgatgccgtgttcgcaatggctcaacgcgcgggcgtactggtggatgacaggccgcatgcacgcgaacac…	MAFHAVRPAMVAGHFYPVDPQALTAQIQGLLAHAVPSDALVPPKALIVPHAGYLYSGPIAASAYAQLQPWRDVIRRVVLLGPSHHEHFPGVAVAGTGAFATPLGEVPVDHDAVFAMAQRAGVLVDDRPHAREHALEVQLPFLQTVLGHFRVLPLLTGMVEPGALAGLLDAVWGGPETLIVVSSDLSHYQPYEQAREQDTASVASMLALAPTLQQTDACGVSGVNALLMAARNHGLQATLLDMRNSGDTAGERGSVVGYAAVNFTMQTRHAVH
NODE_11_length_137584_cov_6.95087_ID_19	fig|857335.5.peg.276	NODE_11_length_137584_cov_6.95087_ID_19_96969_97649	96969	97649	+	hypothetical protein		atgagcttccatctccgtcataccgatatccggatccaggccgagcgtgcctggctcgacgcattgctcagtcatgccccggatgtgcgcgggcttgtcgtttgtgcgcagccttacatcaacaacctgcgggagtctcgtgagtaccatgctgccgccatcctgcgccaggctgggttcgccacgctggtgctgagcctgctgacgccacaggaggaacagcgcgaccccgatctgcgtttcgatgtcgcccaactggttcatcgcttgctcgccgtgctgacctgggcagagcagcagccggatctggccgggctgcccgtggggctgctgggggacgatactgcgattgcggctgcggttcgtcttgctgcgcgcgaacccgggcatctggaggct…	MSFHLRHTDIRIQAERAWLDALLSHAPDVRGLVVCAQPYINNLRESREYHAAAILRQAGFATLVLSLLTPQEEQRDPDLRFDVAQLVHRLLAVLTWAEQQPDLAGLPVGLLGDDTAIAAAVRLAAREPGHLEALVSRCGRIDLVGGEPLRRLMTPLLVLAPGEGSVSPQSARTAYDCVGGEKAWQALEGVSDGLAEAGAMEAAARAACTWFQQHLPERDGDDPVAD
NODE_11_length_137584_cov_6.95087_ID_19	fig|857335.5.peg.277	NODE_11_length_137584_cov_6.95087_ID_19_97630_98337	97630	98337	+	Leucyl/phenylalanyl-tRNA--protein transferase (EC 2.3.2.6)	FIG00000748	atgatcccgtggctgactgagcagccggtctttccttcgcccagtcgtgcattgcgcgagcctgcgggcctgctcgccgctgggggcaggctgacgccggaatggttgctgaacgcctatcgtcagggcattttcccctggttcagcgaaggggatcccatcctctggtggagccccgatccgcgtatggtgctgcgacccggtgcggtgcgaatcagccattcgctgcgcaaaaccctgcgtgcaagccattacgaaatacgctgcgacacggcgttcgccgaggtgatggctgcctgcgctgctcctcgggacgggcaggcgggaacctggatactgcccgagatgcgtgcggcctatgtccggctgcacgaactgggctgggcgcatagcgtggaa…	MIPWLTEQPVFPSPSRALREPAGLLAAGGRLTPEWLLNAYRQGIFPWFSEGDPILWWSPDPRMVLRPGAVRISHSLRKTLRASHYEIRCDTAFAEVMAACAAPRDGQAGTWILPEMRAAYVRLHELGWAHSVETWMDGELVGGLYGVAIGRAFFGESMFHRVRDASKIAFAHLAALLQDRNYAILDCQMSTAHLASLGAAEMSRSQFVAELAALCVEGPVPARWPVDHACREWRD
NODE_11_length_137584_cov_6.95087_ID_19	fig|857335.5.peg.278	NODE_11_length_137584_cov_6.95087_ID_19_98338_99084	98338	99084	+	Arginine-tRNA-protein transferase (EC 2.3.2.8)	FIG00443773	gtgtcgcagttgcaggatctgccctactccctgctgcagttctataccacagccccctatgagtgctcctatctggcccagcgtctggcgcgttcgcaggtggccacgccggggcatctggtggatgccctggtatatggcgaacttgtacgccaagggttccggcgcagcggcatttacacctatcggccctggtgcgatcagtgtcaggcctgtattccggtgcggctaccggtggcggatttcacgcccaaccgcagtcaacggcggacctggcaaaagcatgccggcctgagggcagaagaacttccgctgagatacagggaagaccattacgagctgtatcgccgctatcagctggtgcgccacaacggcggcggcatggatcaggatagccgc…	MSQLQDLPYSLLQFYTTAPYECSYLAQRLARSQVATPGHLVDALVYGELVRQGFRRSGIYTYRPWCDQCQACIPVRLPVADFTPNRSQRRTWQKHAGLRAEELPLRYREDHYELYRRYQLVRHNGGGMDQDSREQYGSFLLESQVDTRLIEFREAGVLRMVSIIDRLSDGLSSVYTFFDPEIEHASFGGYGVLWQIEACRQIGGDYVYLGYWIRDCGKMSYKRQYRPLEGLIGGSWRRLEEEDFLHLG
NODE_11_length_137584_cov_6.95087_ID_19	fig|857335.5.peg.279	NODE_11_length_137584_cov_6.95087_ID_19_99168_101039	99168	101039	+	UDP-N-acetylglucosamine 4,6-dehydratase (EC 4.2.1.-)	FIG00003715	atgaatctgtacaaaaccctgctggtattcgtattcgacctcctggccgctgcgctcgcctggtgtggcggtttctggctgcgcttcaactttgaatggccggcagggtttgcaccgaccatctggctggggctggcgttgctgctacctgcacatgcgttcatctgctatgtcgccgggctgtatcgcgggttgtggatattcgccagtctccctgatctcaagcgggtattgaaggccgtcgctggggcgctgattgtgctggtggccttcagccttatctatcagccgcagcctgttgtgccgcgctccctgctggtgctctatccgatgctgctgttgctcgccatggcgggagggcgtgtggcgtaccgcatgtggaaagagcaccggatgttc…	MNLYKTLLVFVFDLLAAALAWCGGFWLRFNFEWPAGFAPTIWLGLALLLPAHAFICYVAGLYRGLWIFASLPDLKRVLKAVAGALIVLVAFSLIYQPQPVVPRSLLVLYPMLLLLAMAGGRVAYRMWKEHRMFGALAAQGKPVIVVGAGRAAAMLLRDIEKSPDWRVVALLDDNVGKRGRDLSGVRVHGAIGALPDLARELKTRHVILAIPSARAELRRRLADLCGEAGLQLLTVPVLEDILSGKLSVNSIRRVEIEDLLGRETVSIETGNVISLLSGKIVLVTGAGGSIGAELCRQIAHFAPARVLLYELNEYALYSIEQWFAHHHPEIEVRPLAGDVKDAVRLQEVFSVWRPQVVFHAAAYKHVPLMEVDNAWQAVRNNVLGTLNVARHAQAYGAER…
NODE_11_length_137584_cov_6.95087_ID_19	fig|857335.5.peg.280	NODE_11_length_137584_cov_6.95087_ID_19_101309_102274	101309	102274	+	Acetyl-coenzyme A carboxyl transferase alpha chain (EC 6.4.1.2)	FIG00000442	gtgaagacaacctttcttgacttcgaacagcctattgccgatctggaaagccggatcgaggagctgcgcttcgtccaggatgattccgccgtcgatatctcagaggaaatcgcccggctggaagtcaagcggcaggcgctgaccaaggatatctacgccaagctcacgccctggcagatcgcgcaggtggcacgtcatccgcagcgcccctatacgttcgactacgtcgggcacattttcaccgacttccaggaattgcacggtgaccgggcctttgccgacgataaggcgatcgtgggcggactggctcgtttcaacgggcagagttgcatggtgatcggccatcagaaggggcgtgacaccaaggaaaagatcctgcgcaatttcggcatgccgcgc…	MKTTFLDFEQPIADLESRIEELRFVQDDSAVDISEEIARLEVKRQALTKDIYAKLTPWQIAQVARHPQRPYTFDYVGHIFTDFQELHGDRAFADDKAIVGGLARFNGQSCMVIGHQKGRDTKEKILRNFGMPRPEGYRKALRLMRLAEKFGIPVFTFVDTPGAYPGIDAEERGQSEAIGHNLYAMSELCVPIVTTVIGEGGSGGALAIAVADQVLMLQFSTYSVISPEGCASILWKSADKAPEAAEIMGITAARLKSLSLIDKVVNEPVGGAHRDHRAMAVTLKRALQESLRQLTDLSPQELTERRFARLLSYGKFKELAA
NODE_11_length_137584_cov_6.95087_ID_19	fig|857335.5.peg.281	NODE_11_length_137584_cov_6.95087_ID_19_102314_103645	102314	103645	+	tRNA(Ile)-lysidine synthetase (EC 6.3.4.19)	FIG00000257	atgcggccgcgtttctttccgggcatcggcgttggggcatcgccctacaatccgcacatgcccgacgttgatctggaaaaccggctgcggcccaccttgcgcgattgcgcagggttgcgcctgtgcgtggcctatagcggcggcctggactcctccgtcctgttgcacctcctggcgcggcttgcacctgaaggcggatacgttctgtctgccatccatgttcatcatggtttgaatgcccgggccgatgcctgggcggtgcattgcgcccgggcttgtgccggtctgggcattccgctgcatatcgaacgtgtcgtcgtcgagcctgccggcaaaggggtcgaggcagctgcgcgtgaggccaggcatgctgcatttgtcgggcaggatgtcgactgg…	MRPRFFPGIGVGASPYNPHMPDVDLENRLRPTLRDCAGLRLCVAYSGGLDSSVLLHLLARLAPEGGYVLSAIHVHHGLNARADAWAVHCARACAGLGIPLHIERVVVEPAGKGVEAAAREARHAAFVGQDVDWILLAHHADDQAETLLHRLMRGTGVAGAGAMRVRDASRRLWRPLLEVSRAELETWARAQGLGWIEDDSNENRRYTRNYLRHAVMPLLRERQPAVVQALGRAAAHFAESEDLLQVLARQDLATIDPGSPDSRAVLQALGGPRMRNVLRHWLAGCGAPIPSASRLALLCDALSGDGPVRQCFGEYAVCAYHRRLWLEPAILPEPMACAWSGEHELPWGVGRLRFESGAPGDHLQIRPRQGGEVMSLGAGRPRRPLKSLCQDAGLPAWWR…
NODE_11_length_137584_cov_6.95087_ID_19	fig|857335.5.peg.282	NODE_11_length_137584_cov_6.95087_ID_19_105655_103685	105655	103685	-	two-component hybrid sensor and regulator		atgtcgtctccccccgggcagctgcccatccgccctccccgcaccggcccctggttctggcgtctgccgttgctgaccattctcgcgctggtgagcttcgtcggcctcgtcacctggttcggtcttgcccaggagcgtgacgaacgccgcgccatgctgatcagcgacacgctgtggatggagcagaacctgcgcttccagttcgaaagcacggggaacgaactcctgcgcgtcggcaaccagttcggcatcggcggcgagattcattcggacgcggcacaggaaaaaatccgtgaactgctacagggagactccggccttatcgccattctctggctggactccaacggactgctgctgagcacgctgccagccagtgccgcaccgatccgcctgagc…	MSSPPGQLPIRPPRTGPWFWRLPLLTILALVSFVGLVTWFGLAQERDERRAMLISDTLWMEQNLRFQFESTGNELLRVGNQFGIGGEIHSDAAQEKIRELLQGDSGLIAILWLDSNGLLLSTLPASAAPIRLSDEHAITVMRARTLNRPVYSPPYAQPDGMGVIELALPVFGTNDFHGYAIGIFSLPKVISRHVPWWFAERYRLSFIDGDGKALAATTDAGSISPEAGFSVRFDHMNSLGIRVDSYRATTRVTPLLVILVLGGLSLVIAWSLWMLRNRVLRLQETESALRAEHAFRIAMENSTQVGLRARNLQGRITYVNAAFCRMVGWPEDQLRGHQPPMPYWPEQDAAMQTIEPLHLADAPTKTAETRYRRQDGQLFDALVFEAPMIDADGVHTGWV…
NODE_11_length_137584_cov_6.95087_ID_19	fig|857335.5.peg.283	NODE_11_length_137584_cov_6.95087_ID_19_105787_106212	105787	106212	+	Nucleoside diphosphate kinase (EC 2.7.4.6)	FIG00000251	atgagcctgcaacgcaccctgtccatcatcaagcccgatgcggttgcgcgtaactgcatcggccgtatctaccagcgtttcgaggacgccggactgaaaatcgtggccgcccgcatgctgcaactttcgtcgcaggaggcgggtcagttctatgcggtacaccgtgagcgtccgttctatggcgagttggtcgagttcatgagttccggcccggtcatggtgcaggtgctcgaaggcgagagtgccatcctgcgtcaccgcgagctgatgggggccacggatccgaagaaggcggcgccaggcaccattcgcgctgattttgccgagtccgtgcagatcaatgccgtccatggctcggatggagaggatactgccgcgcaggaaatcgccttcttcttt…	MSLQRTLSIIKPDAVARNCIGRIYQRFEDAGLKIVAARMLQLSSQEAGQFYAVHRERPFYGELVEFMSSGPVMVQVLEGESAILRHRELMGATDPKKAAPGTIRADFAESVQINAVHGSDGEDTAAQEIAFFFPGLSIHSR
NODE_11_length_137584_cov_6.95087_ID_19	fig|857335.5.peg.284	NODE_11_length_137584_cov_6.95087_ID_19_106246_107343	106246	107343	+	Ribosomal RNA large subunit methyltransferase N (EC 2.1.1.-)	FIG00000293	atgagtaccaccaatcttctcgatcttgatgccgacgcgctggtggcttggttcgccgagcgaggcgagaagccgttccgggcgcgccaggtgctgcgctggatccatcgcttcggggagaccgatttcgatgccatgaccgacgtggccaaaagcctgcgtgcactgctcagggacacggcttgcgtgcgcccgccggtgccggtcagtgacaagctttcggcagatggcacacgcaagtggttgatggatgtcggcaacgacaatgccgtggaaacggtattcatcccggaagccacgcgcggtaccctgtgcatttcctcgcaggcaggttgtgcgctcgactgcgccttctgctccaccggcaagcaaggcttcaaccgcaacttgagcgcggcc…	MSTTNLLDLDADALVAWFAERGEKPFRARQVLRWIHRFGETDFDAMTDVAKSLRALLRDTACVRPPVPVSDKLSADGTRKWLMDVGNDNAVETVFIPEATRGTLCISSQAGCALDCAFCSTGKQGFNRNLSAAEIIGQLWLANRLLGAEPNGERIISNVVMMGMGEPLTNFDSVVSALKLMLDDHAYGLSRRRVTVSTAGVVPGIDRLREECPVALAVSLHAPNDVLRDRLVPINRKYPLKELLAACLRYLDRAPRDFITFEYIMLAGINDQDEHLRQLIEIARQVPCKFNLIPFNPFPQSGLRRSAAPVVRRFSQLLNEAGIVTTTRKTRGDDVDAACGQLAGQVMDKTRRTRKPIIPVHEVNQ
NODE_11_length_137584_cov_6.95087_ID_19	fig|857335.5.peg.285	NODE_11_length_137584_cov_6.95087_ID_19_107340_108182	107340	108182	+	Type IV pilus biogenesis protein PilF		atgagccgttccgtcgccccgaccatgtccgcaattctggctggatgcctgctggcggcctgcactacggagcccgtgcgttccgacagcatggctgtggcagctcctgccgtcagcggttcggcgatcccggtttcgcgtccgatatccgagcagatcccgtcgaatcccacgacacgatcggcaaaggcgcataccgagctgggcatggcctatatgcgtagtgcgcgcaacggcgtggcgatggacgaggccaggattgccatcaaggcggatgctgggtatgcaccagctcatttgttgatgggcatggtgtacgccttgcaggaacaaccggagctggggcgcccctacttcgaagaggccgtgcgtctggcgccgggagacccggagatcaat…	MSRSVAPTMSAILAGCLLAACTTEPVRSDSMAVAAPAVSGSAIPVSRPISEQIPSNPTTRSAKAHTELGMAYMRSARNGVAMDEARIAIKADAGYAPAHLLMGMVYALQEQPELGRPYFEEAVRLAPGDPEINTAYGWFLCSQGKEADGLRRIEAAARNPYFTTPGNAWMSAGMCLLRMRDYPAAEDRFQRAAQSDAKNTEALIALAETLYMQDKLPRAKHWLDQAMKRVARQPPGVLWLAIRIERKLGNQSLMQVFASRLQQDYPNSNEAMLYREGKFE
NODE_11_length_137584_cov_6.95087_ID_19	fig|857335.5.peg.286	NODE_11_length_137584_cov_6.95087_ID_19_108179_109090	108179	109090	+	Cytoskeletal protein RodZ		gtgagtgagcaagaaacggaagccaggacgtctccctggcagactctgcgtgaggcgcgcgaggcgcgcggattgagcctgcaggatgtgagtgcccatctgaagctggctccgcgccagctggaagccattgagcgaggagagtacgaacgcctgcctggcttggccttcgcgcggggcttcgtgcgcaattacgcccgttttctcggtgttgacgccgcggcctgtctgaagatcatggatggtgccgaaaagcctgcgccggccgaggtcgcttcgcagatgaccactcccagtctggggcgtatgcccacgcctggagactcacgctattccgcgttgccggcggcgctggtggttctggcgattctggtcgtacttggcgcgggctggtatttc…	MSEQETEARTSPWQTLREAREARGLSLQDVSAHLKLAPRQLEAIERGEYERLPGLAFARGFVRNYARFLGVDAAACLKIMDGAEKPAPAEVASQMTTPSLGRMPTPGDSRYSALPAALVVLAILVVLGAGWYFRWFEARDTFEALGSESAVVMSEAALVLPKAEDPTPGSISEPLLQAPAASAPEASAVAVSSVSSSHPAPAAAPVVSAPAPALVSASVPTLSAAAPRLVFTFSGESWVEVRDAEGRLLYSRLNQPGSVQEVQGTPPFDLVIGNAPRVKLVWRDKPVDLVSATRGEVARLKLQ
NODE_11_length_137584_cov_6.95087_ID_19	fig|857335.5.peg.287	NODE_11_length_137584_cov_6.95087_ID_19_109102_110346	109102	110346	+	1-hydroxy-2-methyl-2-(E)-butenyl 4-diphosphate synthase (EC 1.17.7.1)	FIG00000449	atgacagcagatatcccaggagccgccgctgccgcgcgccacgccacccgccaggtgcgcatcgggcgggtgctggtcggctccgacgcacccatcgtggtccagtcgatgaccaacaccgacactgcggatcacatagccaccgcgatccagatcgcgcagctggcgcgagccggttccgagctggtacgcatcacggtcaataacgatgagtccgcgcgtgccgtgccgcgtatcttcgagcaactggcaaagatggatgtcgacgtgcccatcattggggacttccattacaacgggcacaagctgctgatcgagaatccagactgtgcgcagttgctagccaaataccgcatcaatccgggcaacgtcggccaggggacaaagcgtgacacgcag…	MTADIPGAAAAARHATRQVRIGRVLVGSDAPIVVQSMTNTDTADHIATAIQIAQLARAGSELVRITVNNDESARAVPRIFEQLAKMDVDVPIIGDFHYNGHKLLIENPDCAQLLAKYRINPGNVGQGTKRDTQFAQIVELACRHDKPVRIGVNWGSFDQSVLARMMDANAQRATPWDIGAVMREALIVSALESAQAAEGVGLAADRIILSCKVSSVQDLIATYRELARRCDYPLHLGLTEAGMGSKGIVASTAALAVLLQEGIGDTIRVSLTPEPGESRTQEVIVAQEILQTMGLRAFTPMVTACPGCGRTTSTFFQELAQNVQSYVREQMPVWRTQYDGVENLTLAVMGCVVNGPGESKHANIGISLPGTGESPAAPVFIDGQKAVTLRGDNIAAEFR…
NODE_11_length_137584_cov_6.95087_ID_19	fig|857335.5.peg.288	NODE_11_length_137584_cov_6.95087_ID_19_110351_111634	110351	111634	+	Histidyl-tRNA synthetase (EC 6.1.1.21)	FIG00000087	atgagtaccaaactgcaaggcgtgcgcggcatgaacgacctgcttcctgatgaggccgagcgctgggaagcctttgaggagatcgtgcgcgactggctcaagagctatggttatcgcccgatccgctcccccatcgtcgagccgactgccctgttccatcgtggcgtgggcgagcataccgacatcgtcgagaaggagatgtacagcttcgaggaccgtctcaatggcgagcagcttacgctgcgtcccgagggaacggcctcctgcgtgcgctccgtgatcgaacacaacctgctgttccagaactcgcagcgtctctactacagtggaccgatgttccgccacgaacgcccccagaagggacggtaccgccagtttcatcaggtcggggtcgaagcg…	MSTKLQGVRGMNDLLPDEAERWEAFEEIVRDWLKSYGYRPIRSPIVEPTALFHRGVGEHTDIVEKEMYSFEDRLNGEQLTLRPEGTASCVRSVIEHNLLFQNSQRLYYSGPMFRHERPQKGRYRQFHQVGVEALGFAGPDIDAEHIVMCRRLWDDLGLEDVELQLNSLGDAAERATHRAELIAYLERHQDQLDEDGKRRLHANPLRVLDTKNPALQDIVDAAPKLLDYLGAESLKHFEAVQAMLREAAVPYRINPRLVRGLDYYNRTVFEWTTTRLGAQATFCAGGRYDSLIEQLGGRASPACGFAMGMERVMLLWQDGLEAGSLVSPDLYVVHQGERAQPFAFRAAELLRSAGFAVVFHCGGGGFKSQMKKADASGAAFAVIVGDDEAAAGMLALKPL…
NODE_11_length_137584_cov_6.95087_ID_19	fig|857335.5.peg.289	NODE_11_length_137584_cov_6.95087_ID_19_111686_112339	111686	112339	+	Mlr7403 protein	FIG00001046	atgcccgcatatgatctggaagaacaggaacaactggcagccatcaaggcatggtgggaaaagtacggcaacctgctgactggcgtcgcactggtggtggcgctggccgtcagtggtgtgcagggctggcgctggtattccgccggccaggccggcaaggctggtgcactgtacgctgcggtatcccaggcagccttggccaaggatgctgacaagacccgcgccctgaccgacgaactgatcgacaagcatggcagtacgctgtccgcggagctggcagcactgcagatggcacaactcgaggttgaagccggcaagccggatgcggcacgtgcctacctcgagcggctggtcgacaagggcagtgatgccctgttgcgtgatctggcacgactgcgt…	MPAYDLEEQEQLAAIKAWWEKYGNLLTGVALVVALAVSGVQGWRWYSAGQAGKAGALYAAVSQAALAKDADKTRALTDELIDKHGSTLSAELAALQMAQLEVEAGKPDAARAYLERLVDKGSDALLRDLARLRLASLQSDAGDLDAAARTLQATPVPALNARFEDLRGDILFAKGSADEARAAYQRALAAINKTPASAQSQGIRFVVQTKLDALGGA
NODE_11_length_137584_cov_6.95087_ID_19	fig|857335.5.peg.290	NODE_11_length_137584_cov_6.95087_ID_19_112336_113475	112336	113475	+	Outer membrane protein YfgL, lipoprotein component of the protein assembly complex (forms a complex with YaeT, YfiO, and NlpB)	FIG00055556	atgatgaaactgcgctcaccgctgttgctgtgcctgttgtcggcgcttgttcttgccgcttgttcttcttcctccacgcggccacagccttcaccgctgccggtgttttcctctgccgccgaattgcgcgagcagtggtctcatggaccggggaaattgcgcgatgccctgctgcggcccgggttggcgggtggcagtgtctatgccgcaggcgaacagggggaggtgatccgcatcgatgccgccgggcgacgcgtgtggcgtgccgatacggatatccgcctgagtggtggcgttgccagcgatggtggcgtggtattggtcggtggcagtgaaggcgagctggtcgcactggatgccgattccggcaagctgcgttggcggactgctgttggtggc…	MMKLRSPLLLCLLSALVLAACSSSSTRPQPSPLPVFSSAAELREQWSHGPGKLRDALLRPGLAGGSVYAAGEQGEVIRIDAAGRRVWRADTDIRLSGGVASDGGVVLVGGSEGELVALDADSGKLRWRTAVGGEILSLPLIADDLALVRVGDYQIAAYGLTDGKRRWVYQRTQSPLALRSHNGFVRSGDVVLAGFSGGKLVALSLAGGLQRWEATIAQPRGANELERMADVVGEPVLVGEMVCAASFQGRVTCVDRTSGQLRWARDIPSTTGLAADGDSLYVVDSLDAVYSLDVATGSTRWKQEKLGYRQLVRPLVVGTRLVVADAQGYIHVLDRSNGTFVARARADSSGVFAPMLALPNDGFATQTRDGEVIAWSFKR
NODE_11_length_137584_cov_6.95087_ID_19	fig|857335.5.peg.291	NODE_11_length_137584_cov_6.95087_ID_19_113488_114822	113488	114822	+	GTP-binding protein EngA	FIG00129616	gtgaaacctacgctggtgctggtgggccgacccaatgtcggtaaatccactctattcaaccgattgacccggacccgcgatgcgctcgtggcggacatgccggggctgacgcgggaccgccactatggcatcggccgtgtcggttcgcgtgattacttcgtcgtcgataccggaggcttcgagccactggcaaaagagggcgtggtggctgagatggctcgccaggccgaagccgccattgcggaaggcgatgcgttgctgttcattgtcgatgggcgtgtcggtctgacaccgcacgacaagcagattgccgataccttgcgtcgtgctggccgaccagtgtttctggtggtcaacaagggtgaaggcgtcaatcgcgacaccttctcggcggaattt…	MKPTLVLVGRPNVGKSTLFNRLTRTRDALVADMPGLTRDRHYGIGRVGSRDYFVVDTGGFEPLAKEGVVAEMARQAEAAIAEGDALLFIVDGRVGLTPHDKQIADTLRRAGRPVFLVVNKGEGVNRDTFSAEFHELGFGTPYVISAAHGEGVRQLVDLVLESFPAAAEEDEGAERGPRVAIVGRPNVGKSTLINALLGEDRVIAFDMPGTTRDAIAIPFERNGRAYTLIDTAGLRRRGKVFEAIEKFSVIKTLQAVEEANVVVMVLDASQDISDQDAHIAGFVLDAGRALVLAINKWDSVDDYRRERVRAEIERKLYFLGFARHHYISALKSVGVGALLKSVDLAYAAAMAKLPTPRLTRALQLAVSKQAPPRHGVFRPKMRYAHQGGQNPPVVVVHGN…
NODE_11_length_137584_cov_6.95087_ID_19	fig|857335.5.peg.292	NODE_11_length_137584_cov_6.95087_ID_19_114915_115172	114915	115172	+	RNA-binding protein Hfq	FIG00000583	atgagcaacaaaggccagatgctgcaggacccttttttgaacaccctgcgtcgcgaacacatcccggtttccatctacttggtcaatggcatcaagctgcaaggccatgtcgaatctttcgatcagtacgtcgtactgctgaagaatactgtcacccagatggtgtacaagcacgccatctccactgtcgtgcctgcgcgtgcggtttccatcccgcatgaaaatccggcagagcctgccgctgctcccaaggactga	MSNKGQMLQDPFLNTLRREHIPVSIYLVNGIKLQGHVESFDQYVVLLKNTVTQMVYKHAISTVVPARAVSIPHENPAEPAAAPKD
NODE_11_length_137584_cov_6.95087_ID_19	fig|857335.5.peg.293	NODE_11_length_137584_cov_6.95087_ID_19_115304_116434	115304	116434	+	GTP-binding protein HflX	FIG00000304	atgtttgatcgccctagcgcggaagccaatcgcgccatcctcgttcagcttgatttcggtcagccgggattgtcggagcggctgtcggaactgcgtcttctggcagagtctgcgggggccgagatcgtgggcgaagtctacgggccgcggcgagcgccggatcctgccttgttcgcaggttcgggcaaggttgccgaaatcggcgagctggctggtctgcaacaggccgacatcatcatcttcaatcatgaactgagcgcggctcagcagcggaatctcgagcgcgcgctggctcgccgggtgatagactgtacggcgctgatcctggatatcttcgcgcttcgagcgaaaagccacgaaggcaagctgcaggtggagctggctcagcttgagcatcta…	MFDRPSAEANRAILVQLDFGQPGLSERLSELRLLAESAGAEIVGEVYGPRRAPDPALFAGSGKVAEIGELAGLQQADIIIFNHELSAAQQRNLERALARRVIDCTALILDIFALRAKSHEGKLQVELAQLEHLSTRLIRGWTHLERQKGGIGLRGPGETQLETDRRLLGKRVKLLKERLRLLERQRQVRRRGRERRDVPTVSLVGYTNAGKSTLFNAVTKAGAYAADQLFATLDTTSRRVYLGEAGAGVVLSDTVGFIRELPHSLVEAFHATLEETAQADLLLHVVDAASPDREAQIEVVNAVLAEIGAGDVSQILVWNKLDLTHGEPAIELDAYGKIERVLLSARTGAGLGLLRQALANTLYPASAANAEPPSDV
NODE_11_length_137584_cov_6.95087_ID_19	fig|857335.5.peg.294	NODE_11_length_137584_cov_6.95087_ID_19_116468_117745	116468	117745	+	HflK protein	FIG00002847	atgtcaatcaatgatccacgctggggcaacaaggacccagacgatcgccccaacgacgatcgccgcaatccagagcaggggccacctgatctcgacgatatctggcgggatttcaacagccggcttggcggcatgttcggcaagcgtggcggtggcaatggtggcggtaacggcaacaacgttggcggccagccgccggtgtcctcgcgccaactcggcggtgggctggcgctgatcgtagtcgctgtgctcgtgctgtggctggccagcggtttctacattgtcgacgccagtcagcgtggcgtggtgatgcgttttggcaagttccaggaagtgacgggtgaaggcttgcgctggcgtctgccttatcccttcgagagccacgaagtggtggatacc…	MSINDPRWGNKDPDDRPNDDRRNPEQGPPDLDDIWRDFNSRLGGMFGKRGGGNGGGNGNNVGGQPPVSSRQLGGGLALIVVAVLVLWLASGFYIVDASQRGVVMRFGKFQEVTGEGLRWRLPYPFESHEVVDTTRVRNVEVGFRSGDRATNLHESLMLTDDENIVNIQFAVQYNLNSPEAFLFTNKDPDVMVKQVAESAMREVVGKSKMDFVLYEGRETVATDVQVLIQRILDSYKINGFENSGILVNRVTLQNAQPPQQVQAAFEDAVKASQDRERLKNEGQAYFNEVVPKAEGTAARLREEAQAYSASLIARADGDASRFKQLFTEYAKAPEVTRNRLYIDAMEQVFASTTKLMVDTCGNGNLLYLPLDKLLQGGQAASGQPTAVAQTPSAPAAPVA…
NODE_11_length_137584_cov_6.95087_ID_19	fig|857335.5.peg.295	NODE_11_length_137584_cov_6.95087_ID_19_117742_118617	117742	118617	+	HflC protein	FIG01961575	atgatgaatgcacgcctgcccgtatttttcggtgggatcctgctcgccgtggcggtgttgtcgatgtcgctgttcacggtcgatcagcgccgttatgcgctggttttccagttgggcgagatcaagcgtccggtgactgaagccggtctctattttaagttgccgatgatccagaacgtgcagtattacgatgcacgcatccttacgctggattcgccggattccgagcttttccagaccgcagagaagaagaacgtgctggtggactccttcacccgttggcgcatcggggatccgtccgtgtattaccgtgccttcggcatggatgagccgcgtgcccgtaaccgtctgagccagacggtgaacgcggtgatgcgtgaagagtttggtaagcgtcag…	MMNARLPVFFGGILLAVAVLSMSLFTVDQRRYALVFQLGEIKRPVTEAGLYFKLPMIQNVQYYDARILTLDSPDSELFQTAEKKNVLVDSFTRWRIGDPSVYYRAFGMDEPRARNRLSQTVNAVMREEFGKRQMHEVISGERQRMMEVVRERSAQDAVRYGVQIVDVRVKRVELPSAVSDSVYGRMEAERKRVANELRATGGAEAEQIRAEADRRREVIVAEAYRDAQVIKGEGDAKAAAIYAEAFGRSPEFFRFWRSMEAYKQTFNSKSDMLVVDPSSDFFKYLKNSGNK
NODE_11_length_137584_cov_6.95087_ID_19	fig|857335.5.peg.296	NODE_11_length_137584_cov_6.95087_ID_19_118619_118804	118619	118804	+	Putative inner membrane protein YjeT (clustered with HflC)	FIG00001273	atgctgcaggacttccttgccgcactggcgctgatgctggtgcttgaaggcattcttccgcttgtcgcgccaggattctggcgcgacacctttacccgcatcacccgctttacggatggtcaactgcgctttgtcgggctgacctccctgctgctgggctgcgtgctgttcattctgttcaagtga	MLQDFLAALALMLVLEGILPLVAPGFWRDTFTRITRFTDGQLRFVGLTSLLLGCVLFILFK
NODE_11_length_137584_cov_6.95087_ID_19	fig|857335.5.peg.297	NODE_11_length_137584_cov_6.95087_ID_19_118815_119975	118815	119975	+	ATP phosphoribosyltransferase regulatory subunit (EC 2.4.2.17)	FIG00000865	atggcattgccacgctgggccctgcccgaacatttcgaagatgtgttgccacagtctgcggcccgcatcgagcgcttgcgtcgtcttctgctggacgagttccggctgcacggctaccaactggtgattccgcccagcgtggagttcctggattcgctggcttccggcactggcgcggacatggcggatgccatgtacaagttcgtcgatcagtacagcgggcgcaccatggccttgcgtgcagatacaacgcctcaggtcacacgcatcgatgctcaccttctcaatcgcagtggcgtgacgcgtctgtgctattgcgggcctgtggttcacgtcgagccgcgcagcatgagcgcatcgcgcgagcctttgcaggttggcgccgagctctacgggcat…	MALPRWALPEHFEDVLPQSAARIERLRRLLLDEFRLHGYQLVIPPSVEFLDSLASGTGADMADAMYKFVDQYSGRTMALRADTTPQVTRIDAHLLNRSGVTRLCYCGPVVHVEPRSMSASREPLQVGAELYGHAGIEADVEVLRLLARTLQLAGTRSSRIDVGHVGIFRALSAMAGLGGEAERTLFRILQAKDVPALKDFVAGLAEPARSALMILPELYGNANVLVRARSLLPDVAGVREALDQMLHLAKHLGEQPLSFDLADLRGYHYHSGLMFAAYCGNSPTALALGGRYDAVGAAFGRPRPATGFSLDLRELAALSVTAGEAGAILAPQEEDPALQDCIAALRAAGEVVMLALPGHRGCWREAGCDRQIIKQDNAWGVVPLQD
NODE_11_length_137584_cov_6.95087_ID_19	fig|857335.5.peg.298	NODE_11_length_137584_cov_6.95087_ID_19_119987_121297	119987	121297	+	Adenylosuccinate synthetase (EC 6.3.4.4)	FIG00000107	atggcaaagaatgtggtggtggtcggaacccagtggggtgacgaaggcaaaggcaagatcgtcgactggctgaccgatcacgcgcagggcgtggtgcgtttccagggcgggcataatgccgggcatacgctagtcatcggcgaaaaggaatacaagctcaatctggtgccttccggcatcgtgcgcgaaggtgtgcagtgctacatcggcaatggcgtggtgctggacattcatcacctccttggcgagatcgccacgctggaagcggatggcatcgaggtccgctcccgtctgaaggtgagcccggggtgccccctgatcctgccgttccattccgcgctggacaaggcgcgcgaggcgaagaaggccgcctgcgacaagatcggcaccaccggcaaa…	MAKNVVVVGTQWGDEGKGKIVDWLTDHAQGVVRFQGGHNAGHTLVIGEKEYKLNLVPSGIVREGVQCYIGNGVVLDIHHLLGEIATLEADGIEVRSRLKVSPGCPLILPFHSALDKAREAKKAACDKIGTTGKGIGPSYADKVARRALRVYDLFNPERFAVKLREVLDYHNFVLTEYLGAEAVDFQTVFDQAMKDAEAIRPLVSDISDDLYAANAAGQNLLFEGAQGTLLDIDHGTYPFVTSSNCVAGQAAAGSGVGPGMLHYVLGITKAYCTRVGGGPFPSELDIETKGTPGEQMSTVGREFGTVTGRKRRCGWFDAAALRRSARINGLTGLCITKLDVLDGLAELNICTGYTLHGKHVDLLPIGADEVAACEPVYETLPGWTETTFRVKRWEDLPAA…
NODE_11_length_137584_cov_6.95087_ID_19	fig|857335.5.rna.8	NODE_11_length_137584_cov_6.95087_ID_19_121536_121455	121536	121455	-	tRNA-Leu-CAG		gcccaggtggcgaaattggtagacgcgctagtttcaggtactagtgccgcaaggtgtggaggttcgagtcctctcctgggca
NODE_11_length_137584_cov_6.95087_ID_19	fig|857335.5.peg.299	NODE_11_length_137584_cov_6.95087_ID_19_121611_124166	121611	124166	+	3'-to-5' exoribonuclease RNase R	FIG00000308	atgaaaacgaacaagaaaccccgcctggcgcgcattcgcgccgcagatcccttctacgcccgagaggcagagagatacgaatttcccctgccttcgcgtgaatacattcagcagttgctgggtgacgctcgtgcgccgatgcctgtagaggctttggctgaactgctagccatccgggctgatgaacaggaagcttttacgcggcgcctgggcgccatggagcgcgcgggccagctgatgcgcaaccggcggggggcctacatcctgccggacaaggcagacctgatccgtggtcgggttgaagggcaccccgatggttttggttttctcgtgccggacgatggtggtgaggatctctttctggggccacgtgccatgcgtgaggtgttgcatggtgat…	MKTNKKPRLARIRAADPFYAREAERYEFPLPSREYIQQLLGDARAPMPVEALAELLAIRADEQEAFTRRLGAMERAGQLMRNRRGAYILPDKADLIRGRVEGHPDGFGFLVPDDGGEDLFLGPRAMREVLHGDRVLVRVIGADQRGRREAKIIEVLERANERVVGRVAVEAGVAYVIAENRRISQGILLAPGGKQKPRAGQVVSVDLLQQPSQYSQPIGQIVETLGNYADDGMEIEIALRKHDLPFEFSDEVKAEAKKLPAAVRKKDWQWEGGAREDIRHLPLVTIDGETAKDFDDAVYCEKQGRGYRLLVAIADVSHYVTPGSALDVEGLARGNSVYFPRRVIPMLPEKLSNGLCSLNPEVERLCMVCDMSINASGVIKAYRFYPAVMFSHARLTYTK…
NODE_11_length_137584_cov_6.95087_ID_19	fig|857335.5.peg.300	NODE_11_length_137584_cov_6.95087_ID_19_124159_124899	124159	124899	+	23S rRNA (guanosine-2'-O-) -methyltransferase rlmB (EC 2.1.1.-)	FIG00001049	gtggctgaatcacgtttcatccatggttttcatgccgtggccgccaaattgcggcacgacccggaggccatccttgaaatccacgttgccgcgcagcgtagcgatgcgcgcgcgcgcgatctgctcgccagggccgaagctgcgggcgcgcgcatcatcgccacggagtccacgcgcctggatggcatggcgggcacgcatcgtcatcagggggtggtggcgaagatcgatgcgcgccagaaggtgttgcacctgtccgacattctggaagacctcaccgagaacgcattgctgctggtgctcgacggcatcactgatccgcacaacctgggcgcctgtctgcgcgtggcggatgctgccggtgtacatgccgtgatcgcgcccaaggatcgtgccgtg…	MAESRFIHGFHAVAAKLRHDPEAILEIHVAAQRSDARARDLLARAEAAGARIIATESTRLDGMAGTHRHQGVVAKIDARQKVLHLSDILEDLTENALLLVLDGITDPHNLGACLRVADAAGVHAVIAPKDRAVGLNATAVKVASGAADTVPYIVVTNLARTLRELKDAGVWCIGAAGEATKSIYEVDQKGPTAWVLGAEGDGLRRLTRDTCDELAKIPMHGSVESLNVSVASGICLFEARRQRLAK
NODE_11_length_137584_cov_6.95087_ID_19	fig|857335.5.peg.301	NODE_11_length_137584_cov_6.95087_ID_19_125306_124983	125306	124983	-	hypothetical protein		ttgctcgacaccgcccagctcgaagccgtactggccgagttcgcccgcgttcgtgactgggatcgccaccataccccgcgcaacctgctgctggcactgaccggcgaggtaggcgagctggtggagatctttcagtggaagcccgatgcacaagcggaaggcatcatgaatacggacgaagcagagcatgtccgtcaggaagtcgctgacgtctttctctacctgatgcgccttgtgatggttctgggcattgatctggacgacgcggtgcgcaagaaaatcgcgctcaacgccatcaagtaccctccgaaaactgagtgctaa	MLDTAQLEAVLAEFARVRDWDRHHTPRNLLLALTGEVGELVEIFQWKPDAQAEGIMNTDEAEHVRQEVADVFLYLMRLVMVLGIDLDDAVRKKIALNAIKYPPKTEC
NODE_11_length_137584_cov_6.95087_ID_19	fig|857335.5.peg.302	NODE_11_length_137584_cov_6.95087_ID_19_126309_125314	126309	125314	-	COG3178: Predicted phosphotransferase related to Ser/Thr protein kinases	FIG00012552	ttgcaacgtctgcaacaaattcacgcctggctggaaaagcagcttcccgaccagaacttcacgcttgcgcccgcttcggcagacgccagcttccgccgctatttccgcgccacgcttgccgatggcagtacacgcatcatcatggatgcaccacccacgcatgaagactgccgcccttatctcaaggtggcacacctgttcggcgaggcaggagcgcatgttccgcaggtcttcgcggaagatctggaacaaggcttcctattgctctcggatctggggcatcagacctatctttccgcgctgacccaggacaatgccgatgccctgtatgcagacgcactgggcgctctagcagtgatccaacgtgccagtcgccctgacgtactccccgaatatgac…	MQRLQQIHAWLEKQLPDQNFTLAPASADASFRRYFRATLADGSTRIIMDAPPTHEDCRPYLKVAHLFGEAGAHVPQVFAEDLEQGFLLLSDLGHQTYLSALTQDNADALYADALGALAVIQRASRPDVLPEYDRALLLRELMLFPEWYVTRHKGIALNDGETAELMQVFERILAVNLAEPRVFVHRDYHSRNLMISSPNPGVLDFQDAVYGPITYDLTSLFKDAYIHWDEERTLDWLVRYWEIGRQIGLPVRADFAEFHRDYEFMAAQRHIKVLGIFARLYHRDGKDGYLKDMPLVMRYLKAACRRYSELRPLLRLLDRLDPEEQQVGYTF
NODE_11_length_137584_cov_6.95087_ID_19	fig|857335.5.peg.303	NODE_11_length_137584_cov_6.95087_ID_19_126504_128708	126504	128708	+	Outer membrane protein Imp, required for envelope biogenesis / Organic solvent tolerance protein precursor	FIG00019192	ttgcctgctctggcgcaggcgcaggtagaaggcgcagtacagcaatccacggtgcagggaaccgtgatccaagcccagcgaatcgaagggcgcaatcaagtcgatatcgtcgcgcaggatgaagtgcgtctgcagcgcggcggattgatcctcaacagcgatcgcctgttcttcgaccagatcagcaacgaggctctggcgcaagggaatgtccggttgcgacgcgggccggacaccattgaggggccgcgcgcgcggatcaatctggacacgtggttcggcgaggtcgagtcacccacgtatctgttgcaacgcgagcgtcgggtcagcagcgaggtctgggtcagctcccgtccctggatggagcggcgtaccctgggagagaccgtcaccgggtcc…	MPALAQAQVEGAVQQSTVQGTVIQAQRIEGRNQVDIVAQDEVRLQRGGLILNSDRLFFDQISNEALAQGNVRLRRGPDTIEGPRARINLDTWFGEVESPTYLLQRERRVSSEVWVSSRPWMERRTLGETVTGSGQADLLYLEGENHYRLSNSTFTTCPAPDPSWYLRMRDLQLDFDQDKGRATDTSLVFQGVPILYTPWAEFPLSGGRQSGFLPPTLGTTSLTGVDLSLPYYFNLAPNYDATLAPRWMTKRGVQLGGETRYLTSDSHGVLRGEYMNQDCVTGRSRDLWRWQHDQDFGYGLTASVDATRVSDKTYFSDLSSKITSTSQSTLNQQATLNYNNGTWLSGGLTMQRYQVLSGTAPYDRLPQLSLLARNTDFHGLSLQLPMEYTAFSHPTSVEG…
NODE_11_length_137584_cov_6.95087_ID_19	fig|857335.5.peg.304	NODE_11_length_137584_cov_6.95087_ID_19_128711_130024	128711	130024	+	Survival protein SurA precursor (Peptidyl-prolyl cis-trans isomerase SurA) (EC 5.2.1.8)	FIG00036406	atgggtggtcttcaattcaattgggaaagcatgatttttatgatgaagcgcttgctccagatcatttgcgccattgggctgacactccccgttttcgggcaggctgcggaacttgatcgcgtggcggcagtggtcaattctgacgtgctgacggcctccgatctcagctcgcgattggcccaggccgaacgccaactgtcggcacaggggacgaaggtgccgcccgctcagctgcgcagccaggtgctggaacacatggtgctggaacgcatccagctgcagaaagccaaggagcttggcatcaaggtagatgactccacactggatcgagcattggcacgcattgccgagcagaaccagactaccgtggcggagctgccccgcctggtcgccagtgaa…	MGGLQFNWESMIFMMKRLLQIICAIGLTLPVFGQAAELDRVAAVVNSDVLTASDLSSRLAQAERQLSAQGTKVPPAQLRSQVLEHMVLERIQLQKAKELGIKVDDSTLDRALARIAEQNQTTVAELPRLVASEGLAWAQFRESIRTEILLARLREREVDARITVSDAELEATLAAQPQLSGREYRVAHILLRAPEGASPEQLLALGQRAEELQRRIRAGEDFAALAAAYSASPDAMNGGLLDWRPLERLPSIFAERLPQMQKGDVSNILRSAAGLHVFKFVDVRDLAPSKIEITQTHARHILIRTTDVRDPAEGRRRLADIANRIRNGVDFAEMARVHSSDATAAKGGDLGWLSPGETVPEFERAMDALKPGEVSDVVESPFGWHVIQVLERKQVDVTQ…
NODE_11_length_137584_cov_6.95087_ID_19	fig|857335.5.peg.305	NODE_11_length_137584_cov_6.95087_ID_19_130021_131049	130021	131049	+	4-hydroxythreonine-4-phosphate dehydrogenase (EC 1.1.1.262)	FIG00000520	atgaaacctcccgctctggcgatcaccaccggcgagccggcgggtgttggccctgagttgtgcgcgaaactggcaagccgtccgtggcctgccaggctggtgctgatcggagatcgcggcttgcttgcggagcgggcaagaatgaccggcacggcgatctccctgcggcattatttaccgggagatgctgcgcaggtcggtgtgctggacgttctgcatgtaccgctggctcactcctgtcagcccggccagctgtccgtcgccaatgcgggctatgttctgaaaacgctggatctggccattgatggttgcctctccggtgagttcgcggcgatggtgaccgctccggtgcagaagagcgtgatcaacgatgccgggattgtcttctccggccatacc…	MKPPALAITTGEPAGVGPELCAKLASRPWPARLVLIGDRGLLAERARMTGTAISLRHYLPGDAAQVGVLDVLHVPLAHSCQPGQLSVANAGYVLKTLDLAIDGCLSGEFAAMVTAPVQKSVINDAGIVFSGHTEYLAERTGTPRVVMMLAGEYGMGDAHPWMRVALATTHLPLKSVSAVLTAEALTRTIRILHADLRDKFGLPLPRILVAGLNPHAGEAGHMGREEIEVIEPVLAELRREGMDLIGPLPADTLFTPRQLARGDAVLAMYHDQGLPVLKFATFGGGINVTLGLPIIRTSVDHGTALDLAGTGRADGGSLEAAIHCALGMSATRANPNLDSSLS
NODE_11_length_137584_cov_6.95087_ID_19	fig|857335.5.peg.306	NODE_11_length_137584_cov_6.95087_ID_19_131046_131711	131046	131711	+	UPF0028 protein YchK	FIG00613342	atgaagtctttgtcgctttggctgggcgcgctggtcctgctcgcggcctgtgcagcccagccccctcagccctctcccgttcccgtattcacacagccggaagcagaattgcccaagcctgtcgtgccagtgccacgtccggctccgaaaatcggtctggcattgggcggtggtgccgcgcgcggattcgcccatatcggggtgatcaaggcgctggagacacagggcatcgtgcccgacatcgtggtggggactagtgcgggcagcgtggtcggcgcgctctatgccgctggcaatgatgctttcgccctgcagaagctggccttccagctcgacgaaaccgcgctgaccgactgggtcgtcttcgatcgtggcttcctcaagggcgaagcgctggag…	MKSLSLWLGALVLLAACAAQPPQPSPVPVFTQPEAELPKPVVPVPRPAPKIGLALGGGAARGFAHIGVIKALETQGIVPDIVVGTSAGSVVGALYAAGNDAFALQKLAFQLDETALTDWVVFDRGFLKGEALERFINQQTGNRPIEALKRKFGVVATDLAEGQPAVFVTGNTGTAVRASSSIPGVFSPVLIRGQGICGWRSGQPDSGTCCPPDGRRHRDCR
NODE_11_length_137584_cov_6.95087_ID_19	fig|857335.5.peg.307	NODE_11_length_137584_cov_6.95087_ID_19_131683_131961	131683	131961	+	UPF0028 protein YchK		atgggcgccgacatcgtgattgccgttgatatttccggcaagccttccggcaaacgcaatcagggcagcgtcgacctgctgcttgataccgtctccatcatgggggccacacttggcaactacgaactgcgcgatgccgacgtggtgatccggccggagatcaacggattgcccgcagccaactttcagcagcgccacgaagccatcctgcggggcgagaaggcgggctttgctgccatcgcgcagattcgtgaagtgatcaaggcgcacagccagtaa	MGADIVIAVDISGKPSGKRNQGSVDLLLDTVSIMGATLGNYELRDADVVIRPEINGLPAANFQQRHEAILRGEKAGFAAIAQIREVIKAHSQ
NODE_11_length_137584_cov_6.95087_ID_19	fig|857335.5.peg.308	NODE_11_length_137584_cov_6.95087_ID_19_131970_132764	131970	132764	+	SSU rRNA (adenine(1518)-N(6)/adenine(1519)-N(6))-dimethyltransferase (EC 2.1.1.182)	FIG00000225	atgccccaaggccatatcgcccgcaaacgtttcgggcagaattttctttccgatgccaacatcatccgcaaaatcgtggcagcgatcgcgccgcgcccgggggatctgctggtcgagatcggtcccgggctgggggcgctgaccgagcctttgctggcagccagcgagcatctgcacgtggtcgagatcgaccgcgatctgattgcccggctgaaggaaaaacatgacccagcgcatctgaccatccatgagggggacgcgctgaagttcgatttcggcacgttgggttcgccactgcgcgtggtcggcaacctgccctacaacatctccacccccatccttttccaccttgccggctatgccgaccaggttcgcgacatgaccttcatgctgcagaag…	MPQGHIARKRFGQNFLSDANIIRKIVAAIAPRPGDLLVEIGPGLGALTEPLLAASEHLHVVEIDRDLIARLKEKHDPAHLTIHEGDALKFDFGTLGSPLRVVGNLPYNISTPILFHLAGYADQVRDMTFMLQKEVVDRMVAEPDTEAYGRLSVMLQYRFNMASLFDVPPGAFRPAPKVTSAIVYLQPKPAAECVCTDEALLGRIVTAAFGQRRKTLRNTLREWLKEEDFVALGIDPQARGETLGVADYVRMVSHLSSHTHSGAM
NODE_11_length_137584_cov_6.95087_ID_19	fig|857335.5.peg.309	NODE_11_length_137584_cov_6.95087_ID_19_132828_133931	132828	133931	+	Mannose-1-phosphate guanylyltransferase (EC 2.7.7.13 )	FIG00913434	atggccaaggcaatgattctcgcagcggggcagggcacccgcgtccgaccgctgaccaaggacatccccaaaccgatgatccccattctgggcaagccggtactcgaatacatcatcgagcacctggcacgtcacggcgtgcgcgagatcatgatcaacgtggctttcatgcaccgcaagatcgaggagtatttcggtgacggccatcgctggggcgtggaaatcggttattcctacgagggcgcctacgaacatggcgagatcgtgcccaaacccatcggctcggccggtggcatgaagcacattcaggacaactccggcttcttcgatgacaccaccctggtgctgtgcggggatgcgatcatcgatctggacatcggagccgccctgtacgaacac…	MAKAMILAAGQGTRVRPLTKDIPKPMIPILGKPVLEYIIEHLARHGVREIMINVAFMHRKIEEYFGDGHRWGVEIGYSYEGAYEHGEIVPKPIGSAGGMKHIQDNSGFFDDTTLVLCGDAIIDLDIGAALYEHRNKGAIASVVTLDVPLSEVKNYGIVVADEQGKIISFQEKPCPEEAKSTLASTGIYIFEPAALDLVPSGQVYDIGSQLFPLLVEKQLPFFAQNRFFNWIDIGRVTDYWTVLQRVLRGEVAQMDMPGKEVRPGVWVGLNTRIDWDKVTVEGPVYIGSSVKIEEGATIVGPTWIGHGSHLRKGATVERSVLFEYTRIGEGMKFSEMIVSARYCVDRHGNTVYVGDDRCVLRWGDARG
NODE_11_length_137584_cov_6.95087_ID_19	fig|857335.5.peg.310	NODE_11_length_137584_cov_6.95087_ID_19_133982_134179	133982	134179	+	hypothetical protein		atgcgtaccactgtcacccttgatgatgaattgctgactagagccgagcagctcagcggtctgagcgaacgcagcgcgctgctgcgtgaggcattacttgcgctggtgcagcgcgagagcgcccggcgcctggcggcccttggcgcctccgagccggaggcggcctacgtggtacggcggcaaggggacccggcatga	MRTTVTLDDELLTRAEQLSGLSERSALLREALLALVQRESARRLAALGASEPEAAYVVRRQGDPA
NODE_11_length_137584_cov_6.95087_ID_19	fig|857335.5.peg.311	NODE_11_length_137584_cov_6.95087_ID_19_134176_134547	134176	134547	+	PIN domain protein	FIG01310754	atgatcctggtcgatacttcggtttggatcgatcatttacgcaacggcgaacctcgccttgccgcgctgctcgaagccgggcaggtgctggttcatgatttcgtgatcggcgaactggcctgcggcaacctgagcacgcggacccgcgtgctcggcctgctgggcaccatgccgcgtgccacgcgggcacaggaaaccgaaaccctggggctgatcgagcgttaccggctcatggggcgtggcatcggctacgtggatgcgcacctgctcgcggcgaccttgatcgcccgagggcgtctctggagcagggatcggcgcctggccacaattgcggccgaactcggggttgcctgcgaagagattgcacattga	MILVDTSVWIDHLRNGEPRLAALLEAGQVLVHDFVIGELACGNLSTRTRVLGLLGTMPRATRAQETETLGLIERYRLMGRGIGYVDAHLLAATLIARGRLWSRDRRLATIAAELGVACEEIAH
NODE_11_length_137584_cov_6.95087_ID_19	fig|857335.5.peg.312	NODE_11_length_137584_cov_6.95087_ID_19_134544_135527	134544	135527	+	YihE protein, required for LPS synthesis	FIG01345359	ttgagcgacgctccgcacccattcgccacactcacgccggatcgcgtgctggacgccatcgacgcaaccggattgcgtaccgacggccgcctgctggcgctcaacagctatgagaatcgtgtctaccaggccgggctcgaagagggcggcttcatcgtcgccaagttctaccgcccggatcgctggagcgatgcggcaatccgtgaggagcatgccttcacgcgtgcgctggccgaggccgagatcccggccgtgccgccgctgttacgtgctgacggtgacagtctgacccatgccgaaggtttccgcgtggcggtgtttccgcgccggggcgggcgaagcctggagctgaatgatcccgaggttctggaatggctgggccgtttcatcgggcgcata…	MSDAPHPFATLTPDRVLDAIDATGLRTDGRLLALNSYENRVYQAGLEEGGFIVAKFYRPDRWSDAAIREEHAFTRALAEAEIPAVPPLLRADGDSLTHAEGFRVAVFPRRGGRSLELNDPEVLEWLGRFIGRIHAVGATAAFRERLTLDVATWGEAPSAFVLASPHLPSDLCEAYRGAVSAALEGVHACFERAGDITRLRLHGDCHPGNVMWTDAGPHFVDFDDACTGPAVQDLWMLLSGERGEMTRQLADLVAGYEDFREFNPREVDLIEALRTLRLIHHAAWLARRWDDPAFPTAFPWFNTRGWWEEHIGNLRDQLPRMAEPWRF
NODE_11_length_137584_cov_6.95087_ID_19	fig|857335.5.peg.313	NODE_11_length_137584_cov_6.95087_ID_19_135600_136148	135600	136148	+	dTDP-4-dehydrorhamnose 3,5-epimerase (EC 5.1.3.13)	FIG00000408	atgaacatcatcaagggagaactcgaaggtttgctgatcctggagccgaaggtgttcggtgacgcgcgcggtttcttcatggaaagctacaacgagaagaccttccgcgaggccacgggcctgcagctcgatttcgtgcaggacaaccactcccgttctgcacggggcgtgctgcgcggtctgcactatcaactgcagcaagcccagggcaagctcgtccgcgtggtcagtgggcgggtgtgggacgtggcggtggacatgcggcgctcatcgcccactttcggccaatggcagggtgtcgagctctccgctgaaaacaatcgtcagttctgggtccccgccggcttcgcacacggtttcgtggtgctctccgagtcggcggatttcctttacaagacc…	MNIIKGELEGLLILEPKVFGDARGFFMESYNEKTFREATGLQLDFVQDNHSRSARGVLRGLHYQLQQAQGKLVRVVSGRVWDVAVDMRRSSPTFGQWQGVELSAENNRQFWVPAGFAHGFVVLSESADFLYKTTDYYAPAHERCLAWNDSTVGVAWPLDDSVPQLSAKDRQGLALADCETYA
NODE_11_length_137584_cov_6.95087_ID_19	fig|857335.5.peg.314	NODE_11_length_137584_cov_6.95087_ID_19_136159_137178	136159	137178	+	UDP-glucose 4-epimerase (EC 5.1.3.2)	FIG00022300	atgccctgcgtgctcgtgaccggcggtgctggctacatcggctcccacacctgcatcgagctgctggccagcggcttcgaggtggtggtggtcgacaacctctgcaacagcaaggccgaggccctgcggcgcgtcgaggcactggccggccgcaggctggccggcttccaccaggcggacgtgcgggaccgcgccgccatgcgcgaggtgttcagggcgtacgccatcgatgcggtgatccacttcgctgcattgaaggctgtgggcgaatccgtcgccaagcccctgatgtactacgagaacaacattgccggcacggtcgccctggccgaggtgatgagcgaggccggcgtgaaaacgctggtcttcagctcctcggctacagtgtatggcgacccg…	MPCVLVTGGAGYIGSHTCIELLASGFEVVVVDNLCNSKAEALRRVEALAGRRLAGFHQADVRDRAAMREVFRAYAIDAVIHFAALKAVGESVAKPLMYYENNIAGTVALAEVMSEAGVKTLVFSSSATVYGDPASVPIREDFPTGPTNPYGRTKWMMEFVLSDLAAADPAWRVALLRYFNPVGAHPSGRIGEDPNGIPNNLMPFVSQVAVGKRAKLSVFGGDYPTPDGTGVRDYIHVVDLAIGHVKALNYLAGKTGVLTVNLGTGIGYSVLDVVRAFEKASGRSIPYEIVARRAGDIAQCYADPAMAVELLGWQAARGIEEMCADAWHWQRGNPEGYPG
NODE_11_length_137584_cov_6.95087_ID_19	fig|857335.5.peg.315	NODE_11_length_137584_cov_6.95087_ID_19_137546_137313	137546	137313	-	Deacetylases, including yeast histone deacetylase and acetoin utilization protein	FIG00001794	ttggccgtgatcctgaaaagcggggcggaaaccatggtcgtgtcgctgggcgtggatgctttcgcaggcgacccgatcagcaagttccagctgcaaatgtcggactacgcccggctggggcagcgcctgcgccaaaccggcctgcccacgctattcgtgctggaaggcggctatgccgtggccgagatcggccacaacgtgctggccacgctgcaggggttcgaaggctgctga	MAVILKSGAETMVVSLGVDAFAGDPISKFQLQMSDYARLGQRLRQTGLPTLFVLEGGYAVAEIGHNVLATLQGFEGC
NODE_12031_length_7781_cov_11.857_ID_17	fig|857335.5.peg.316	NODE_12031_length_7781_cov_11.857_ID_17_42_404	42	404	+	Mobile element protein	FIG01306568	gtgccgggcatcggtgcggccagcgtggcggtattgctggccgaactgcctgaattgggcaagctcgaccgacgccgtatcgccgcgctggtgggcgtggcgcccctgaaccgcgactctggccagatgcgtggccagcgctgcatctggggcgggcgcgcagatgtgcggcgaacgctgtacatggctacgttgacggcagtccggcataacctggcgctcaaggcctgctacgagcgcctgctggcggcgggcaagcgcaagaaggtggccctggttgcctgcatgcgcaagctgctgacgatgctcaacgccattgcgaaacatggctcgatgtgggattcgactatgcatagcgcttga	MPGIGAASVAVLLAELPELGKLDRRRIAALVGVAPLNRDSGQMRGQRCIWGGRADVRRTLYMATLTAVRHNLALKACYERLLAAGKRKKVALVACMRKLLTMLNAIAKHGSMWDSTMHSA
NODE_12031_length_7781_cov_11.857_ID_17	fig|857335.5.peg.317	NODE_12031_length_7781_cov_11.857_ID_17_1485_421	1485	421	-	Nicotinate-nucleotide--dimethylbenzimidazole phosphoribosyltransferase (EC 2.4.2.21)	FIG00000824	atgaccatcgcattcgacatccagcctctctcccgcgaactcgctgccgcgttacagcaccgcctcgatacccgcacaaaaccgctgggcagcctgggccggctggaagcgctggccttgcagaccggcctgatccagcaaagcctgactccccggatccagtctccacgcatcgcagtctttgccggcgaccatggcgcggccaaagcgggcgtgggcgcctacccgcaggaggtcacgatgcagatggtggccaactttctcgcaggcggcgctgccatcaacgtgatggcgcgcgagaccgggctgacgctggccgtgatcgactgcggcgtggccaacgaagtgcccggtcagtcgcaagccggcgtggaataccacctcgcccgccagggccgg…	MTIAFDIQPLSRELAAALQHRLDTRTKPLGSLGRLEALALQTGLIQQSLTPRIQSPRIAVFAGDHGAAKAGVGAYPQEVTMQMVANFLAGGAAINVMARETGLTLAVIDCGVANEVPGQSQAGVEYHLARQGRGTANYIEQPAMTAAQRDAAIAAGAGLVRRWHAEGCNAIGFGEMGIGNTSSASLLTHLITGTPLAEVIGRGAGLDDAGLARKQALLAQAAARTAAHPLTASEALTEFGGFEIATITGAFLAAAEARMLIVVDGFIVTSALLVAHAIAPAVLDYCVFAHDSAEPGHAAQLRHLDATALLQLGMRLGEGAGAALAFPLIRAALACMNEMAGFEDAGVSTASAED
NODE_12031_length_7781_cov_11.857_ID_17	fig|857335.5.peg.318	NODE_12031_length_7781_cov_11.857_ID_17_1952_1563	1952	1563	-	Transglutaminase-like enzyme, putative cysteine protease		gtgctgcttgcgggcttcggctactgctatgcgaaaagccatctgctcgcagccctgctgcgggccaacggcattgccgccgggctctgctatcaacgcctttcctgtggcgagtccggccctccgtactgcctgcatgcgctcaacgccgtcctactgcccggttcaggctggtaccggatcgacgcacgcggcaacaagcctggtgtccaggcggatttcactccgccgcaagaacgactggctttcgacctgcgggatgaacacgaagccgattttcccctgatacacgctgcgccgctgccagtagtcgtggcagccctgcgtgccgcgccggacatcttctggctgtacgagcacctgccggatctcatgcctccacctgcgtaa	MLLAGFGYCYAKSHLLAALLRANGIAAGLCYQRLSCGESGPPYCLHALNAVLLPGSGWYRIDARGNKPGVQADFTPPQERLAFDLRDEHEADFPLIHAAPLPVVVAALRAAPDIFWLYEHLPDLMPPPA
NODE_12031_length_7781_cov_11.857_ID_17	fig|857335.5.peg.319	NODE_12031_length_7781_cov_11.857_ID_17_2168_1953	2168	1953	-	hypothetical protein		atgaaactgaaccccgtagccgcgctggccgactatctcgcgccctgcgccatcatcgatgcggatcatcccgccatcgtcgccaaggccgctgaactgcacgccgcccagaccgggccgctcgaactggcacgcgccagtttcgaattcgtgcgtgacgggatacgccacagttgggacgcacagcaagggccgatcacgctcaaggcgtcctaa	MKLNPVAALADYLAPCAIIDADHPAIVAKAAELHAAQTGPLELARASFEFVRDGIRHSWDAQQGPITLKAS
NODE_12031_length_7781_cov_11.857_ID_17	fig|857335.5.peg.320	NODE_12031_length_7781_cov_11.857_ID_17_2743_2165	2743	2165	-	Adenosylcobinamide-phosphate guanylyltransferase (EC 2.7.7.62)	FIG00000764	gtgagccgccatctcgtgatcggcggcgcgcgctcgggcaagagccgcttcgcgcaggcactcgccgaggcccacgccggcgacgtggcgctgatcgtgacggcagagattctcgacgaggaaatgcgcgaacgcatcgccagacaccaggccgaacgccccgcacactggcatgccaccgaggcaccgctcgatctgcccggcgccatcgagcgcctggccgtagggtgcgccgtgcgcaccaattccaccgacatacccgacaatccggtgcgcacggcgcaccctacatccttcgtactcgtggattgcctcacgctgtggctctccaacatcttgtgcacgcaacccgaacggctggatgaatacgccgacgcgctatgcattgccatcggcaac…	MSRHLVIGGARSGKSRFAQALAEAHAGDVALIVTAEILDEEMRERIARHQAERPAHWHATEAPLDLPGAIERLAVGCAVRTNSTDIPDNPVRTAHPTSFVLVDCLTLWLSNILCTQPERLDEYADALCIAIGNARGELVLVSNEVGWSIVPENSLARRFRDEQGRLNQRVAALCDEVTLVAAGLPLRLKTPS
NODE_12031_length_7781_cov_11.857_ID_17	fig|857335.5.peg.321	NODE_12031_length_7781_cov_11.857_ID_17_3657_2740	3657	2740	-	Vitamin B12 ABC transporter, B12-binding component BtuF	FIG00016684	atgaaccgcctcaccgcctttgcccgccgcctgctcccccttctgacgctgatccccgcctgcgcgatggctgcgccgatcaccgtgcgcgatgacaacggcagcacgctgaccctcaagacacccgcacaacgtgtgatcgcgctggcccccagcctggccgaactggtcttcgaagtcggcggcggcgagaggctgatcggtgccgtggaatacagcgactacccgccgcaggccagcaagctgccacgcatcggcagcaaccaaaagctggatctggagcgcgtcgtcaaactcaagccggatctgatcctggtctggtatcacggcaacgcccatcgcgagatcgaacgactggccgcgctgaagatcccgatgttccacctcgagccgaaaaac…	MNRLTAFARRLLPLLTLIPACAMAAPITVRDDNGSTLTLKTPAQRVIALAPSLAELVFEVGGGERLIGAVEYSDYPPQASKLPRIGSNQKLDLERVVKLKPDLILVWYHGNAHREIERLAALKIPMFHLEPKNISDIPGAMERIGRLLDTRTIADAAILRFRDQHARLLREYGGRAPVRTFYQVYERPLLTINDHQLISDVIRLCGGVNVFGKEPMLVPQLSTESVVAANPEVILTANMGGGGGTAQRAMDEPRLAEWLKFGNMAAVKSQQLWLIPGDLISRHGPRILDGAEAVCTALDDARKRR
NODE_12031_length_7781_cov_11.857_ID_17	fig|857335.5.peg.322	NODE_12031_length_7781_cov_11.857_ID_17_4448_3654	4448	3654	-	ABC-type hemin transport system, ATPase component		atgagcgcccgcatcagcctgcaactggaaaacctgcaattgcgcgccggcggcctgccggaggggcgcatgctgatcgaatcgctgaacgtcagcatccagtctggcgaacgctgggtgctgctgggccccaatggcgcgggcaagtccaccctgctgatggtgctggcggggctggtgcaacccaacgcgggcgaagcacggctgaacggccaccggctcgccgactgggcacccgccgatctcgcccgccagcgcgcctggtgtccgcaattctggttcgaccccttcccggtcagcgcctgggaaaccgtggccagcgcgcaactggcgctctcgccgcaggcggatgccgcccaggtggaaaccacggcgcgccggtggctgagcgagttcggc…	MSARISLQLENLQLRAGGLPEGRMLIESLNVSIQSGERWVLLGPNGAGKSTLLMVLAGLVQPNAGEARLNGHRLADWAPADLARQRAWCPQFWFDPFPVSAWETVASAQLALSPQADAAQVETTARRWLSEFGVGHLADNDVRLLSGGERQRVALATACAQDAPLLLLDEPSAHLDWSHQALLQARLKRWSSSGGTVLAAVHDLNLAWTLASHALLLDGRGGALAGTREEVLGAGTLSHAYGVPVSQREEDGRRWFRIDLEHSA
NODE_12031_length_7781_cov_11.857_ID_17	fig|857335.5.peg.323	NODE_12031_length_7781_cov_11.857_ID_17_5335_4445	5335	4445	-	transport system permease protein		atggccggctcggccggctggggctggccttcgcacgagatcttctggctgatccgcgtaccgcgcgtgctggcagccttcggcaccggtgccgcgctggcgctggcaggcgcgctgatccagctcgtcagccgcaatccgctggccgacccccacgtgctgggcgtgaccagcggcgcctcgctcggcgcggtgttgatgctggccttcgccgccggcctgccgctggcgcccgagatcggcgccgtctgcggtgcgctgggctccatgacactggtgttcggcctcgcctggggcggcatgaaccggggcttgtcacccagcgctgcgccgggcacggtactcgtactgctggtcggtgtaatggtcggcacggtatgcggggcgggcgtctccttc…	MAGSAGWGWPSHEIFWLIRVPRVLAAFGTGAALALAGALIQLVSRNPLADPHVLGVTSGASLGAVLMLAFAAGLPLAPEIGAVCGALGSMTLVFGLAWGGMNRGLSPSAAPGTVLVLLVGVMVGTVCGAGVSFTLSVANDSQLRNIVFWLLGDLNGASLWWPIWAAAGIALLLVWPRARELDWIARGDAWAWTLGVPVARRRRTAIFAACLVTGAAVATAGSIGFVGLVAPHIVRLTGLRHARLLIPFSAVFGGVFLVLADTAARTLIAPVQLPVGVISAAVGAPLFLALLLRRHA
NODE_12031_length_7781_cov_11.857_ID_17	fig|857335.5.peg.324	NODE_12031_length_7781_cov_11.857_ID_17_7198_5585	7198	5585	-	Cobyric acid synthase (EC 6.3.5.10)	FIG00000530	atgagcacccgcaccctgatggtgcagggctgcactttggatgccggcaaaagcgccgtggtcgccgcgctctgtcgctggctggtgcgccagggcgtgcgcgtcgcccccttcaagccgcagaacatggcgctgaattccgccgtcaccgccgatggcggcgaaatcggtcgcgcccaggctgctcaagccatggcctgccgcatcgcgccgaccactgacatgaacccggtgctgctcaaaccgaacaccgacgtcggcgcgcaggtgatcgtgcagggacatgccatcggcaacatggacgcgctcgactatcacgcctacaaagccactgccaaagcagcggtgatcgaatccttcagtcgcctgtgcacgcaatacgaagcagtgatcgtcgaa…	MSTRTLMVQGCTLDAGKSAVVAALCRWLVRQGVRVAPFKPQNMALNSAVTADGGEIGRAQAAQAMACRIAPTTDMNPVLLKPNTDVGAQVIVQGHAIGNMDALDYHAYKATAKAAVIESFSRLCTQYEAVIVEGAGSPAEINLRANDIANMGFAEAVDCPVILVADIDRGGVFAHLVGTLELLSPSEQARVKGFVINRFRGDIALLQRGLDWLTQRTGKPVLGVLPYLHGLQLEAEDAISRDQPSPGAARIPGEKPAEPLSPWEIGVGERARLRVIVPVTPRISNHTDFDALRLHPQIDFRFIGPDDPIPHADLIILPGSKAVRADLAFLRQQGWDAAITRHLRYGGKLIGICGGFQMLGTEITDPHGLEGPPETADGLGWLRMRTTLESAKQLRNERG…
NODE_12031_length_7781_cov_11.857_ID_17	fig|857335.5.peg.325	NODE_12031_length_7781_cov_11.857_ID_17_7767_7195	7767	7195	-	L-threonine 3-O-phosphate decarboxylase (EC 4.1.1.81)	FIG00000863	gtggtcgacgaagccttcatcgatgccacacccgaggccagcgtgatcgatcaagcccatctacccggcctgatcgtgttgcgctcgctgggcaagttctggggcctggccggtatccgctgcggcttcgccgccgcagaggatgcgctgctggacacgctggacgcctgcctgggcccgtgggccgtcagccatcccgcgcgctggattgcccagcgcgcactggccgactgtggctggcagcaggccacggcaagccgcctgctggccgccagcgaacgccttgccagcctgctcgacgcgcacgggctggccttgcgcgctgtttcgctgggtgccgacgccgcaggccgaggcgctccacacggctttcgcgcggcacgccgtgctcgtgcgcgc…	MVDEAFIDATPEASVIDQAHLPGLIVLRSLGKFWGLAGIRCGFAAAEDALLDTLDACLGPWAVSHPARWIAQRALADCGWQQATASRLLAASERLASLLDAHGLALRAVSLGADAAGRGAPHGFRAARRARARARRRPALRPARRGSRMAETRNRAARGHAMSPVISVGCAMRTDPAHTHGNPVRPQVSP
NODE_12070_length_7740_cov_17.5866_ID_24943	fig|857335.5.peg.326	NODE_12070_length_7740_cov_17.5866_ID_24943_266_15	266	15	-	High potential iron-sulfur protein		atggatagccgccgccgttccatcctcattgcagccccggctctggcattgggtctgggtgtcatgcgcaacgctgtcgcgcaggcaaaagtgaccgagagcgatcccatggcgatggctctgggttacaaggaagatgctgccaaggtcgatacagtcaaattcaagaactacgccaaaggtcagacttgtgccaattgccggttctatgtgaatcgccccgggtttcctagacagccccgagcttcatga	MDSRRRSILIAAPALALGLGVMRNAVAQAKVTESDPMAMALGYKEDAAKVDTVKFKNYAKGQTCANCRFYVNRPGFPRQPRAS
NODE_12070_length_7740_cov_17.5866_ID_24943	fig|857335.5.peg.327	NODE_12070_length_7740_cov_17.5866_ID_24943_1897_377	1897	377	-	Ubiquinone biosynthesis monooxygenase UbiB	FIG00000320	gtgcgactgctccgcctctcccgcatcatcaacgtcggcctgcgtttcgggctggaccagatgatcttcgaccaagcgtccgccacccgtttcggcggatgggtgcagcgcgcattgccggcacgcaggtttgctgcgccgcgcgcgcaacgcttgcgcgaggcgctcgaaaccctggggccgatctttgtcaaattcggccagttgctgtctacgcggcgcgatctgttggcgcccgacgtcgccgatgaactggcccgcctgcaggatcgcgtaccgccgtttccttccgagcaggcattggccgtgctggccgaggaatatggtcggccggccgacgaggtattcgcgcaattcaatgcacagcccgtggcgtccgcctcggtggcgcaggtgcat…	MRLLRLSRIINVGLRFGLDQMIFDQASATRFGGWVQRALPARRFAAPRAQRLREALETLGPIFVKFGQLLSTRRDLLAPDVADELARLQDRVPPFPSEQALAVLAEEYGRPADEVFAQFNAQPVASASVAQVHFAVLPDGTEVAVKILRPGIAPVITHDIGLLDAAAWLLEKLWRDGRRLKPRALVAEYARHLDDELDMMREAANCSQLRRNFADSPLLAVPAVHWDYCTRNVMVMQRMSGTPVSQIAALRAQGVDLKALSRAGVEIFFTQVFRDGYFHADMHPGNILVTPRGQYVALDFGIMGPLNERDKSYLAQNFLAFFKRDYKRVAQAHIDAGWVPAHTRPDEFEAAIRAVCEPIFDRPLKDISFGKTLLRLFQTARRFEMEVQPQLAMLQKTLL…
NODE_12070_length_7740_cov_17.5866_ID_24943	fig|857335.5.peg.328	NODE_12070_length_7740_cov_17.5866_ID_24943_2931_1954	2931	1954	-	TsaC protein (YrdC-Sua5 domains) required for threonylcarbamoyladenosine t(6)A37 modification in tRNA		atgatctgtagcgatactcccgaagacatcgcccgcgctgccgagctgctgcgcgcaggcaagctggtggcgttccccaccgaaacggtttatggcctgggcgcagatgcgtccaaccccgaggcttcgcgtggcatcttcgcggccaagggccgacccgccgaccatccgctgatcgtgcatctggcggatgccgaacaactccctggctgggcgcgtgaaatcccgaaagaagccatcgcactggcacgtgccttctggcccggcccgctgaccctgatcctgaagaaggaggcggacgttcccgacgtggtcacaggcggccaggatacggtcggcctgcgtgtgccggatcatccggtggcgcttgccctgctgcgtgttttcggtggtggcgtg…	MICSDTPEDIARAAELLRAGKLVAFPTETVYGLGADASNPEASRGIFAAKGRPADHPLIVHLADAEQLPGWAREIPKEAIALARAFWPGPLTLILKKEADVPDVVTGGQDTVGLRVPDHPVALALLRVFGGGVAGPSANRFGRISPTTAQHVQEELGDAVAMILEGGACEVGIESTILDLSRGELVLLRPGMIGRTAIEAVIGRPVRLKGEGEAAPRVSGALAAHYAPRTPMRMASSAEIAVAAGDCAVLTRAGESAPGRYVMAIDAPFDAHGYAHELYANLRALDASGAREILVQTLPDDSAWDAVHDRLGRAVVGSGTGRDET
NODE_12070_length_7740_cov_17.5866_ID_24943	fig|857335.5.peg.329	NODE_12070_length_7740_cov_17.5866_ID_24943_3794_2928	3794	2928	-	dienelactone hydrolase		atgcgctggcgccagaggcttgtagagctgtgctgggcgctggccgtagtctgtgtgccggcctgggctgcacccttgccggcggaagtctcgatccccgcagcgggatcatcttcttcgccggagcctctgcgggctcatctgttcgcgccggaaggtcccgggccgcatccggctgtcgtcatgctgcatggatgtggtggcgcctatgctcgcgatggcagcctgaatgcccgccaccggatgtggggagaatttctggccgagcacggttatgtggccttgatgctcgatagccttagcgcacggggcatcagggagctctgtacgcagaaatttgccgagcgcagcctcaaggaagccgaccggcgtggcgatgcctacgctgcgctgacctgg…	MRWRQRLVELCWALAVVCVPAWAAPLPAEVSIPAAGSSSSPEPLRAHLFAPEGPGPHPAVVMLHGCGGAYARDGSLNARHRMWGEFLAEHGYVALMLDSLSARGIRELCTQKFAERSLKEADRRGDAYAALTWLRERPDVDGLRIGLLGWSHGGGVTLDAITHPPKAGDGFAAAVAFYPGCTSKAARASRFHPYAPLLLLIGEADDWTPAAPCQQLAQAVVARGEPMQIVVYPGTFHDFDNPALTRKRVRRDVPNGVNPGQGVTTAPNPEAREDAKLRVLGFFSEHLQ
NODE_12070_length_7740_cov_17.5866_ID_24943	fig|857335.5.peg.330	NODE_12070_length_7740_cov_17.5866_ID_24943_4959_3796	4959	3796	-	Phosphoribosylaminoimidazole carboxylase ATPase subunit (EC 4.1.1.21)	FIG00000375	atgatccagatagcttctcccatactgcctcctgccacgctcggcatgctgggaggcggccagcttggccgtttcttcgtgctggccgcccatgaaatgggctaccaggtctgggtgctggatccggatccagccagtccggccggcaaggcggcggaccgccatctgtgcgtggcctatgacgaccaggcggcactggacgaaatcgcctcgcagtgcgcggcggtgacgaccgagttcgagaacgtgccggccgccacgctgaagtatctggccaggtccgttcccgtgcgcccgaatgccgatgccgtggcgatctgccagaaccgcgtcgcggagaaaacctttctgcgcgataacggcattccgcatgcggcattcgcgtcgatcgaacgtctt…	MIQIASPILPPATLGMLGGGQLGRFFVLAAHEMGYQVWVLDPDPASPAGKAADRHLCVAYDDQAALDEIASQCAAVTTEFENVPAATLKYLARSVPVRPNADAVAICQNRVAEKTFLRDNGIPHAAFASIERLEDLRTVEAALFPGILKVARFGYDGKGQARVANREEAMAAFQAFNNEACVLEQMLKLDYEVSVVLARDEHGACKCFPVAENQHARGILDISVAPARASVCQRDSAQEIAERLAEKLGYIGTLGVEFFVSRGELYVNEMAPRPHNSGHYTVDACVTSQYEQQVRALCGLPLGDARAHSAAVMVNLLGDAWFDEAGNCREPDWARLFAVPGLKLHLYGKHEARPGRKMGHYTVIDADPQKAFDAAMAVRAALGIKDE
NODE_12070_length_7740_cov_17.5866_ID_24943	fig|857335.5.peg.331	NODE_12070_length_7740_cov_17.5866_ID_24943_5303_4959	5303	4959	-	Ethidium bromide-methyl viologen resistance protein EmrE	FIG01312131	gtgaatcttcagcaacaggcctggtgggcgctggccgtggccattgtctgtgaggtgatcgccacatcggccctcaaggcttcggcgggtttcagccgtccactgccgagcgtgctggtcgtgctgggctatggtgccgctttttatttgctgaccatcgtactgcgcagcatccctgtgggggttgcctatgccatctggtctggcgccggcatcgtgctggtcagtctggtgggctggctgctgtaccggcagtcgctggacacgccggcgattcttggcatcggcctgattctggccggagttctcgttctcaacctgttttcccgttctgcggcgcactga	MNLQQQAWWALAVAIVCEVIATSALKASAGFSRPLPSVLVVLGYGAAFYLLTIVLRSIPVGVAYAIWSGAGIVLVSLVGWLLYRQSLDTPAILGIGLILAGVLVLNLFSRSAAH
NODE_12070_length_7740_cov_17.5866_ID_24943	fig|857335.5.peg.332	NODE_12070_length_7740_cov_17.5866_ID_24943_5800_5300	5800	5300	-	Phosphoribosylaminoimidazole carboxylase catalytic subunit (EC 4.1.1.21)	FIG00000227	atgagcacgccgaatcctgtcatcggcatcgtcatggggtcgaattccgactggccgacgatgcaggccgctgcccgtatcctcaaggatttcggagtgccttacgaggcgcgcgtggtttccgcgcatcgcacgccggatctgatgttcgagtatgccgagcaggcgcgggagcgcggcctcaaggcgatcatcgctggagccggcggtgcggcacatctgccgggcatgctggcggcaaagactatcgtgccggtgctgggcgtgccggtgcagagccgtgccctgtccggggtcgattccctgcattccatcgtccagatgcccaagggcattccagtagcgaccttcgcgattggcgaggcgggagctgcgaatgccgcgctgttcgcggtggcg…	MSTPNPVIGIVMGSNSDWPTMQAAARILKDFGVPYEARVVSAHRTPDLMFEYAEQARERGLKAIIAGAGGAAHLPGMLAAKTIVPVLGVPVQSRALSGVDSLHSIVQMPKGIPVATFAIGEAGAANAALFAVALLANGETRLALMLQAFRERQTQSVLDMTLDDPL
NODE_12070_length_7740_cov_17.5866_ID_24943	fig|857335.5.peg.333	NODE_12070_length_7740_cov_17.5866_ID_24943_6660_5797	6660	5797	-	Methylenetetrahydrofolate dehydrogenase (NADP+) (EC 1.5.1.5) / Methenyltetrahydrofolate cyclohydrolase (EC 3.5.4.9)	FIG00000105	atgactgcccgcatcatcgacggcaaggcactcgccgaaaaagtacgcgaagagatcgctcaacgcgcagccgaactcaccgcccagggcgtgcagccctgcctcgccgtgatcctggtcggcgaagaccctgcttctgccgtatacgtccgcaacaaggtggcgggctgcgagaaggcaggctttcgctcattgaagttcacctatccggtggatgtcgcgccggaagtggtgttcgccaagatcgccgaactgaacgccgatgcgacggtgcatggcattctggtgcaattgccgctgccgaagcagttcgatgccgacaaggtgctcgaagccatttcgccggagaaggacgtcgatggttttcatgctgagaacttcggcttgctgctgcagggg…	MTARIIDGKALAEKVREEIAQRAAELTAQGVQPCLAVILVGEDPASAVYVRNKVAGCEKAGFRSLKFTYPVDVAPEVVFAKIAELNADATVHGILVQLPLPKQFDADKVLEAISPEKDVDGFHAENFGLLLQGRKSFYPCTPWGVMKMLDSEGVQLKRMEAVVIGRSNIVGKPMAVMLLSRGATVTVCHSQTKDLAFHTKRADLVVAAVGRAKFLTGDMIKPGAVVVDVGINRDADGKLCGDVDFDTARDVASLLTPVPGGVGPMTITMLLANTVESAQRVLEAKQQ
NODE_12070_length_7740_cov_17.5866_ID_24943	fig|857335.5.peg.334	NODE_12070_length_7740_cov_17.5866_ID_24943_7589_6783	7589	6783	-	Pectate lyase precursor (EC 4.2.2.2)	FIG00905834	gtgaaccgggggcgattcaagttcgactatctggagacaaacaaatcttcgatgacggtgtacaactatctgcgtcagttcatgacgcaggaccagatcatggaagttgccagttaccagaaaaagggccatctgatcggcgccaacggattgaaagagccgagtacctataccgtcacgctgcaccacaattactacaacgggttgatggaccggatgccacgtctgcgttcgggtgacgtgcaggtgttcaatatctatgccgattccggcgatgcccgcgttaccaaaaaatggtatgacgatctgttcaatgcgaccagttcgtcgctgaccgcgaaactgacttcaggttcttaccatttcggtgtgacttccaatggttcgatcttgacggaa…	MNRGRFKFDYLETNKSSMTVYNYLRQFMTQDQIMEVASYQKKGHLIGANGLKEPSTYTVTLHHNYYNGLMDRMPRLRSGDVQVFNIYADSGDARVTKKWYDDLFNATSSSLTAKLTSGSYHFGVTSNGSILTEGGMVEVTNSFYKGVLTPLRNNQTDVTNSSYTGAIRAYGTRHELLSGTDSSYMASPQSSYTDSSSVTWMVWAGDSSATDSSLGPTQATPIDFAWHNGEPPTPKNLHTATELPDLLTKYAGAGKVSLTAAQWMNANN
NODE_1208_length_43622_cov_19.6961_ID_2773	fig|857335.5.peg.335	NODE_1208_length_43622_cov_19.6961_ID_2773_65_802	65	802	+	transcriptional regulator, Crp/Fnr family	FIG00007339	gtggaccagaaagtaaatttccccctgacttcgaacaacatgcgcgttgcctgcagccagtgcaacctgcgcgagctttgtctcgccgtgggtctggatgaaggggatctgcacaaactcgacgacctggtgaccaagcggaagctcaagcgtggtcagcaactctatcgggccggcgatccgttcgaggccatgtacgccatccgtactggtttcttcaagacggacatcctgaccgaagagggtctggaacaggtgaccggcttccagatggcgggggagatcattggcatggatggcatcagcaatgatcgccatgtctgcaatgccacggcgctggaagacagcgaggtctgtgtgatgccctacgatcagctcgaagagctctcgcgcaagata…	MDQKVNFPLTSNNMRVACSQCNLRELCLAVGLDEGDLHKLDDLVTKRKLKRGQQLYRAGDPFEAMYAIRTGFFKTDILTEEGLEQVTGFQMAGEIIGMDGISNDRHVCNATALEDSEVCVMPYDQLEELSRKIQTLQQQFHKLMSREIVRDQSLMILLGSMRAEKRIAAFLLNLSQRMRMRGYSASEFHLRMTREEIGSYLGLKLETVSRAFSKFHDEGLIGVQQKYIRILNADGLKALLNHSTP
NODE_1208_length_43622_cov_19.6961_ID_2773	fig|857335.5.peg.336	NODE_1208_length_43622_cov_19.6961_ID_2773_1045_1488	1045	1488	+	Universal stress protein		atgtatacccatctgctggttcccaccgatggctccgagctttctaccaaggccctgacccaagccatcaactttgccaagagtctgggggcaaagataacgttcctgtatgtacaaccagagttcccactgctcatagccggagaaggcgcattgcttctacctgaaaatcgggaggagtttgcgcgtgatacggcagctcaggcggaacagattctctctgaagcgcgctcccgggcagcggctcaaggggtggaagccagttcatgcacggcagtcagtgacgtgccttatcaggtcatcatcaatacagccgacgcggagggctgcgacttggttttcatggcctcacatgcccgcaaggggctggtcggcattattctgggatcggaaaccaag…	MYTHLLVPTDGSELSTKALTQAINFAKSLGAKITFLYVQPEFPLLIAGEGALLLPENREEFARDTAAQAEQILSEARSRAAAQGVEASSCTAVSDVPYQVIINTADAEGCDLVFMASHARKGLVGIILGSETKKVLSHSKIPVLVYR
NODE_1208_length_43622_cov_19.6961_ID_2773	fig|857335.5.peg.337	NODE_1208_length_43622_cov_19.6961_ID_2773_2034_1543	2034	1543	-	Putative analog of CcoH, COG3198		gtgcaaagcgttcagtgtccctggtatcgccatgcctgggtttggttcatcatctcttttccgctggctgcggtattgggaggttttgcaacctggtatctggcttggcaatcagacgatggcctggttgtcactgactattacaagcgcggtctcgaaatcaatcaatccctggcgacccgcgataccgcgcgcatgctcggtctgcaggcggagatgctctggaaggatgggcgtttgagcctacagatgcagtcgtcgcgcgagttgagttggcccgatgaactgaccttggatgtcatgaatgccacccgggccagcgcagaccaacatgtacgcatgttcaggaatggcggactctatctggccgagctgggtgaaacccttccagccgggcgc…	MQSVQCPWYRHAWVWFIISFPLAAVLGGFATWYLAWQSDDGLVVTDYYKRGLEINQSLATRDTARMLGLQAEMLWKDGRLSLQMQSSRELSWPDELTLDVMNATRASADQHVRMFRNGGLYLAELGETLPAGRWNLLLSDFGQTWQLHARVVLPSEAEIRFEP
NODE_1208_length_43622_cov_19.6961_ID_2773	fig|857335.5.peg.338	NODE_1208_length_43622_cov_19.6961_ID_2773_3442_2051	3442	2051	-	Type cbb3 cytochrome oxidase biogenesis protein CcoG, involved in Cu oxidation	FIG00138562	atgaccagtgcgccgcgcagcgcggaaaccgatacgctttacgaggtccgccacaaggtctatcccagggctgtgagtggaatgtttgcgcgctggcgctgggccatggtgtggatcacccagctagtgttctacggtctgtgctggttgccttggaatgggcgacaggcggtgctttttcacctggctgaacggaagttctatctatttggctgggtgttttggccgcaagatgtcttctatctgtcggtactgctgatcatcagcgctttttccttgttcctgttcaccgcagcggcggggcggctgtggtgtggttatgcctgtccccaaacggtctacaccgagatttttttgtggatcgagcgtgtatgcgaaggagatcgtgcaaagcggatc…	MTSAPRSAETDTLYEVRHKVYPRAVSGMFARWRWAMVWITQLVFYGLCWLPWNGRQAVLFHLAERKFYLFGWVFWPQDVFYLSVLLIISAFSLFLFTAAAGRLWCGYACPQTVYTEIFLWIERVCEGDRAKRIKLDNAAASLNKLSRKGAKYSFWILLSLWAGISFVGYFTPIRELISELFSLQVAGWSLFWVLFYGGFTYLMAGVMREQVCKYMCPYARFQGVMFDPDTLTITYDSSRGEPRGVRRKGVEPQGQGDCVDCGICVQVCPTGIDIRNGLQYECIGCAACIDACDQVMDKVGLPRGLVRYSTENAIRQHWGANDILRHVLRPRIMIYSAILLVLCVGFLWALLARQPVHLDVHKDRSVMAREVEGELLENVYVLQLINMSEQDHVFSVSVQ…
NODE_1208_length_43622_cov_19.6961_ID_2773	fig|857335.5.peg.339	NODE_1208_length_43622_cov_19.6961_ID_2773_4353_3439	4353	3439	-	Cytochrome c oxidase subunit CcoP (EC 1.9.3.1)	FIG00001139	atgagtgatttcgtcagtgacagctggcattactatgtggcgggactggtagtcctgagcctgatcttctgcgcctggatcctgatttccaacatgacccgacgcaagccggggccggtggaactgcaggaccacgtatgggacgagacgctacaggagtacaacaatcccttgccgcgctggtggctctatctcttctggctcacgctggcttttgccgtggcttattttgttctgtatccagggttggggcgttggcaaggcaagcttggctggtcctcctctgggcagtacaaagccgaggttgccacggtcaacgagcagatcggtccgatttaccgcaaattcctatcgcaggatgtgcgtgcagtttctctcgatccggaagcccgcgccatg…	MSDFVSDSWHYYVAGLVVLSLIFCAWILISNMTRRKPGPVELQDHVWDETLQEYNNPLPRWWLYLFWLTLAFAVAYFVLYPGLGRWQGKLGWSSSGQYKAEVATVNEQIGPIYRKFLSQDVRAVSLDPEARAMGQRLFLTYCAQCHGSDAGGNKGFPNLTDSDWLHGGEPENIRTTIENGRIGVMAPFGEALGSENVKDVANYVRSLSGLAHDALRAQRGRQVFADNCVACHGPEGKGNQTVGAPNLTDRTWLWGSTEATIIETVTYGRVNQMPSFKTLLGDEKIHLLTAYVLSLSAGKDAQTR
NODE_1208_length_43622_cov_19.6961_ID_2773	fig|857335.5.peg.340	NODE_1208_length_43622_cov_19.6961_ID_2773_4538_4350	4538	4350	-	Cytochrome c oxidase subunit CcoQ (EC 1.9.3.1)		atggacgtcaatgatctgcgttccttcctgacactggccggcttcgtgtgtttcatcgcaattgctgtctgggcgtacagccgcggtgcacgcaagggattcgatgaagcagccatgctaccgtttgcagacgaagagggtgagcgcgccactatggcgcagccgactatcaggggtgaggcatcatga	MDVNDLRSFLTLAGFVCFIAIAVWAYSRGARKGFDEAAMLPFADEEGERATMAQPTIRGEAS
NODE_1208_length_43622_cov_19.6961_ID_2773	fig|857335.5.peg.341	NODE_1208_length_43622_cov_19.6961_ID_2773_5172_4525	5172	4525	-	Cytochrome c oxidase subunit CcoO (EC 1.9.3.1)	FIG00001108	atgaaactcaacaatgaactgatcgaaaagagtgtgccgttgctggtcgtgctgacctttctggttatcagcgttggcggtctggtggaaatcgtaccgctgttcttccagcactccacaacccaaccggtatcgggtgtgaagccgtacgacccggtccggttggccggacgggatatctacgttcgcgagggctgctatgtctgtcattcgcagatgattcgcccattccgagcggaaaccgagcgttacgggcattactccgtagcaggggagttcgtgtatgaccgccccttccagtgggggtcgcggcggattggcccggatctcgctagggttggcgggcgctattcagactcttggcagaaggcgcacctgctgaatccgcgtagtgtcgta…	MKLNNELIEKSVPLLVVLTFLVISVGGLVEIVPLFFQHSTTQPVSGVKPYDPVRLAGRDIYVREGCYVCHSQMIRPFRAETERYGHYSVAGEFVYDRPFQWGSRRIGPDLARVGGRYSDSWQKAHLLNPRSVVPESNMPAFSWLDRPVKADGIETRMEVLRTLGSPYTDEEIAGAGAALTGKTELDVLVAYLQGLGTAIPGSEPPLAGGAGDGRQ
NODE_1208_length_43622_cov_19.6961_ID_2773	fig|857335.5.peg.342	NODE_1208_length_43622_cov_19.6961_ID_2773_6644_5184	6644	5184	-	Cytochrome c oxidase subunit CcoN (EC 1.9.3.1)	FIG00103126	atggcgctggcgatcgaaatccaacatgaggtggcaggtatgcaaacccaggcaacttacgactacaaggtcgtgaggcagttcacggtcatgacgatcgtgtgggggatcgtaggcatgctggtcggcgtgatcatcgctgcccagctcgtctggcccgaactcaatgttcttgaatggctgcatttcggacgattgcgtccgttgcacaccaatgcagtgatcttcgcattcggtggctgtgcgctgatcggatcctcttatttcgtcgttcagcgtacgtcacatacatcgcttttcgctccctggttggcaagttttaccttctgggggtggcaagccgtgatcgtactggcggcgattactctgccgctgggcattacctcgggcaaggaatac…	MALAIEIQHEVAGMQTQATYDYKVVRQFTVMTIVWGIVGMLVGVIIAAQLVWPELNVLEWLHFGRLRPLHTNAVIFAFGGCALIGSSYFVVQRTSHTSLFAPWLASFTFWGWQAVIVLAAITLPLGITSGKEYAELEWPIDILIAVVWVAYAVVFFGTIVKRKTQHIYVANWFYGAFILAVALLHIVNSAALPVSLLKSYSAYAGVQDAMIQWWYGHNAVGFFLTAGFLGMMYYFVPKQAQRPVYSYRLSVVHFWALIFTYMWAGPHHLHYTALPDWTQSLGMVFSLILLAPSWGGMINGIMTLSGAWDKLRTDPILKFLITSLSFYGMSTFEGPMMSIKTVNALSHYTDWTIGHVHSGALGWVGMITIGTVYYLLPRMYGKTEMYSVRLINWHFWVAT…
NODE_1208_length_43622_cov_19.6961_ID_2773	fig|857335.5.peg.343	NODE_1208_length_43622_cov_19.6961_ID_2773_7193_7008	7193	7008	-	Type cbb3 cytochrome oxidase biogenesis protein CcoS, involved in heme b insertion	FIG00014915	atggaagcaagcctctatatcctgattccgttgtccgttgcgctggtgatcgtgatcgcagcgctgttctggtggtctctgcgaagtgggcagttcgacgacctggaagggccagcctttcgggtgctaatggaagatgacagcaagcccgagattgacacggcaaaagaacaactcaaggagtag	MEASLYILIPLSVALVIVIAALFWWSLRSGQFDDLEGPAFRVLMEDDSKPEIDTAKEQLKE
NODE_1208_length_43622_cov_19.6961_ID_2773	fig|857335.5.peg.344	NODE_1208_length_43622_cov_19.6961_ID_2773_9529_7169	9529	7169	-	Type cbb3 cytochrome oxidase biogenesis protein CcoI; Copper-translocating P-type ATPase (EC 3.6.3.4)	FIG00001370	gtgtgctgtggtggctgccaggcggtttgtgaggcgatcctgtccaacggactgggagactactaccagcatcgggaagggtttcctgaacgtcctgttgacgtgctgcccgaggctctgcgcgagttggccttgtttgaccaacctgctttccagcagggtttcgtgcgcccgttggaggggggggagcgagaggcagatctcatcctggaagggatcagctgttcggcttgtgtatggctcaacgagcggcacctgatgcagttggttggagtcagtgcggtacaggtgaattatgcaacgcaccgggccagggtgcgctggcacgaggcgcaggtcacattgtccgggatcatgctggccgtgcagagcatcggctatcgggcgcatccgttcgat…	MCCGGCQAVCEAILSNGLGDYYQHREGFPERPVDVLPEALRELALFDQPAFQQGFVRPLEGGEREADLILEGISCSACVWLNERHLMQLVGVSAVQVNYATHRARVRWHEAQVTLSGIMLAVQSIGYRAHPFDPQRSEELAHRERRAALWRLFVAGFGMMQVMMYAYPEYIAGEGEMSTGASALMRWASLILTLPVILYSAAPFFQRAWRDLRLRRLGMDVPVALGLGVAFLASLQATLSGQGSVYFDSVTMFVFFLLSGRYFEMLARQRAARGVERLVRMMPTFARRLLPGGGVEERVPVSALQIGDRLLVRPGELIAADGVVTAGQSEVNEAWLTGESAPVPKWIGSEVLGGSTNGSGALEFIAHRVGATTRLATIRQLMERAVTERPRLVAQADKV…
NODE_1208_length_43622_cov_19.6961_ID_2773	fig|857335.5.rna.9	NODE_1208_length_43622_cov_19.6961_ID_2773_9811_9739	9811	9739	-	tRNA-Thr-CGT		gctgctgtagctcagtcggtagagcaactgattcgtaatcagtaggtcaccagttcgattccggtcagcagca
NODE_1208_length_43622_cov_19.6961_ID_2773	fig|857335.5.peg.345	NODE_1208_length_43622_cov_19.6961_ID_2773_10465_11052	10465	11052	+	Type IV fimbrial biogenesis protein FimT		atgctgaggcgctcctacatcgcaggtttcactctgattgagttgatgatcgtgttggcaatcatggccattctgaccatgttaaccattcccagcctggctacctggatggccaacagccgcgtgcgaagcgtcgccgaagcgatgcaaaatgccatccgacaggcacaggcagaagcgctgacgcgcaatcgccaggtcgttttcgccctgaccaataccaccccggcactcaacgcagccgccagcgccaatgggaaacactggtacatgcaggtcttgccgctagtggacgcgggtgaaaacgcgagcaccttcatcagaggagagaaagtcgcctcgaccaactccgtcacgatcacgggtaacgccgtcacctgtttcaattcccaaggacgc…	MLRRSYIAGFTLIELMIVLAIMAILTMLTIPSLATWMANSRVRSVAEAMQNAIRQAQAEALTRNRQVVFALTNTTPALNAAASANGKHWYMQVLPLVDAGENASTFIRGEKVASTNSVTITGNAVTCFNSQGRLASNTSTGLGNDCTLPGNLVSFGLTATGADRPLRVEVYLGGKVRLCDPAKTLSSTQPEGCSA
NODE_1208_length_43622_cov_19.6961_ID_2773	fig|857335.5.peg.346	NODE_1208_length_43622_cov_19.6961_ID_2773_11067_11450	11067	11450	+	Type IV fimbrial biogenesis protein PilV		gtgctcgtcgagcagcgcggcgcagcactactggaagcgctcatcgccatcctgatattttcccttggcgtcttgggcctgattggcctgctggccacgtcgacccagttttcgatcgatgcagaggaccgtacccgtgcctcgatgctagccaacgatctggtagcacagatgtgggaaaagcaaactgtttcgctcgacagcgacaccctctccgcttgggaatcgcgagttcaggatcccagcaacggccttccttccgccaacgcgaacagcactgtcgatgccagtggcgtagccaacgtcaccatcacctggaaggccccatggcgcccttccgctgagcagagcaacatctacagcacgcaggttcagatcccatga	MLVEQRGAALLEALIAILIFSLGVLGLIGLLATSTQFSIDAEDRTRASMLANDLVAQMWEKQTVSLDSDTLSAWESRVQDPSNGLPSANANSTVDASGVANVTITWKAPWRPSAEQSNIYSTQVQIP
NODE_1208_length_43622_cov_19.6961_ID_2773	fig|857335.5.peg.347	NODE_1208_length_43622_cov_19.6961_ID_2773_11447_12643	11447	12643	+	Type IV fimbrial biogenesis protein PilW		atgacaaagccaccccagcctcaacgtggcataacgctcatcgagctgatggtcgcgctcgtgattgcgtccttgcttgccattgcggtggccagcgttctggcaagctatgaagggcacaaacgcacaaccacttcggtaaacgatattaatcaaagcggaaactacgctgcatggacgctggatagcctgttacgcagcgccggatccggctttgctctgaatgccccaacgattgaagacaacagcacccaactcgccaatttgatctacggttgcaagatattggcaagcaagaatggcagcacagtcttgccgcgcagcagcgccctacctgcacctttcgccgatattgatcagacattcaggctcgctcccgtccttatcctgcaagacggt…	MTKPPQPQRGITLIELMVALVIASLLAIAVASVLASYEGHKRTTTSVNDINQSGNYAAWTLDSLLRSAGSGFALNAPTIEDNSTQLANLIYGCKILASKNGSTVLPRSSALPAPFADIDQTFRLAPVLILQDGSTPTDSGNDSDILIIMGGTSGKAEAPAYLDDYPASDSLELKNTLSFSASDLALLTKSELGSSGVQPCFLTQVSTSFVESGSGSLTLGGDYYAATISGQEVSGYAKHDIALNIGNIANGNTPVIAALGVGDNSTLFSYDLLQSTAAPLQAIASGVFELHALYGLDTNGDGKVDSWSKPENDFAYAALTTGSSAAASNISQIKAIRVGLILRTSLLEKEAPNSPSLTLFSDLGSDLAYSPALSTDNTLYRYRTMEFNVPLRNPMLLE
NODE_1208_length_43622_cov_19.6961_ID_2773	fig|857335.5.peg.348	NODE_1208_length_43622_cov_19.6961_ID_2773_13265_17137	13265	17137	+	Type IV fimbrial biogenesis protein PilY1	FIG00007479	atgacaaatagaatgcatctccacccaatttcgttgatcgtcatcatgctatatggatgcactctgcattctgcggcatcggcaagcgaaatttccttggctgactcaccgctattttcttctgtctcagtcccgggcaatcttgccttggctctttctgtcgaatacccaacggccacaacgccggcctatacgaccagttatagcagcaacacaacctatcttgggtattttgattcgaataaatgctacacctatcaatacaacagcacaaacgcagaagcaagttattttaagccgaacagagcagctaccaaccgcacctgccccgctgcaaccacaacactccaactatggagcggaaactatctaaattgggcctcaatgcaaacgctggac…	MTNRMHLHPISLIVIMLYGCTLHSAASASEISLADSPLFSSVSVPGNLALALSVEYPTATTPAYTTSYSSNTTYLGYFDSNKCYTYQYNSTNAEASYFKPNRAATNRTCPAATTTLQLWSGNYLNWASMQTLDTFRWILTGGYRSVDNTTQTILTKTYAWYNGLNDNKSISSGVSTATPFNWSSSHTRVRSLGTAMYIAATSGTLGGSTIVNYNGHNNAVSNTNTKWAKSNSIYRVYINIEVCASSTLKESNCVAYGSNFKPEGLMQQYSKQLRYAAFGYYNQDGNDRDGGVLRAPMKFIGPTSTIPGSAAIANPNSEWDPSTGIMHINPNPEDVAATINAAAAEGFTVTVENSGVMNYLNKFGYYSQRYKSNDPVSELYYAVSRYLRNKGNVPAYTSL…
NODE_1208_length_43622_cov_19.6961_ID_2773	fig|857335.5.peg.349	NODE_1208_length_43622_cov_19.6961_ID_2773_17255_17533	17255	17533	+	Mobile element protein	FIG01306568	atgagtagcaagcgatacacggaagagttcaagattgaagcggtcaagcaagtgaccgatcgtggacatagcgttgcggacgttgccgggcgactggatgtgagcatccacagtctgtacgcatggatcaagcgctacagcctgacgccgcaggagcgtcaaacgcaggatagccaagaggacgagttacgtcggctacgagccgagctcaagcgggtaaccgaggagcgcgacatcctaaaaaaggccacagcgtactttgccaagcagtccgggtaa	MSSKRYTEEFKIEAVKQVTDRGHSVADVAGRLDVSIHSLYAWIKRYSLTPQERQTQDSQEDELRRLRAELKRVTEERDILKKATAYFAKQSG
NODE_1208_length_43622_cov_19.6961_ID_2773	fig|857335.5.peg.350	NODE_1208_length_43622_cov_19.6961_ID_2773_17514_18410	17514	18410	+	Mobile element protein	FIG01306568	ttgccaagcagtccgggtaaggtacgccttcatcgaagcgcatcagaacgtctggccaatccgacgcatgtgcaaggtcatgcgggtccatccgagtgggtactacgcctggcacaagcccagccgctgtctgcacctgccctggaagatcagcgcattgaaggcctgatcaagcagtgctggctggaaagtggtgccgtgtatggttaccgtaagatcacgcatgacctgcgcgatctgggcgaatcctgcggcaagcatcgtgttgctcggctgatgcgccagatcggcctcaagtccctgacgggctatgggcgtcggccgggccgctacggggggggctgtcctgccaacgtgtcaccgaaccatcttcagcgcgagttcgacgtgagcgaaccg…	MPSSPGKVRLHRSASERLANPTHVQGHAGPSEWVLRLAQAQPLSAPALEDQRIEGLIKQCWLESGAVYGYRKITHDLRDLGESCGKHRVARLMRQIGLKSLTGYGRRPGRYGGGCPANVSPNHLQREFDVSEPNKVWVTDITYIRTHEGWLFLAAVLDLFSRQVVGWSMSAQMTADLALNALLMAVWHRKPTQEVMVHSDQGSQFSSDDWQSFLRANKLKGSMSRRGNCHDNAVAESFFQLLKRERIKRKIYPTREDARRDVFDYIEMFYNPKRRHSHANGMSPIDYEKQYFMKLGAV
NODE_1208_length_43622_cov_19.6961_ID_2773	fig|857335.5.peg.351	NODE_1208_length_43622_cov_19.6961_ID_2773_18554_19315	18554	19315	+	Spermidine synthase (EC 2.5.1.16)	FIG00000642	atgcgacatgactccatcgacatcagtgaagaagctggcgtgcgttatctgcatttcggctcggaatggatccagggcgccatgcgtatccgccgtccggtggatctggagctcgaatacacccgcgagatgatgttcggcctgctgttgcgcgaaggtttcaccgccgacgcgcgctggccgcgcaacatcctgcagatcggactgggcgctggctcactgacgaagttcgcctactggaagctgcctcagacacgcgtcgcagtggtcgaaatcgatcctgccgtacatgcagcagcctgtttccacttcaagctgccggccgaggatctgcgcctgcacatcgaaatcggcgacggtgtggactatgtattgaatgggcaacgcgagttcgattac…	MRHDSIDISEEAGVRYLHFGSEWIQGAMRIRRPVDLELEYTREMMFGLLLREGFTADARWPRNILQIGLGAGSLTKFAYWKLPQTRVAVVEIDPAVHAAACFHFKLPAEDLRLHIEIGDGVDYVLNGQREFDYIQIDGFDADAGVGALDSLPFYQACRARLSDQGLLATNFFGSDNQYEPALQRLYKAFDGRCLALPPCTSGNVIALAASGAPITISDGALQAAARTLKTSTGLDLLPSVKRLQLAFPGNMQM
NODE_1208_length_43622_cov_19.6961_ID_2773	fig|857335.5.peg.352	NODE_1208_length_43622_cov_19.6961_ID_2773_19864_20268	19864	20268	+	hypothetical protein		ttgactttccaggggcgctttgacgagagcatcgaaccttttgaaaaactacgtgcccacgccttgctggcaggcatcgcacgtgaacgacgcaaaggctggtgcatccacctggatgggcttgcagacaaacaacacatccaggcagcactattggcggaaccattaggaacccggattctcggcctcggccagggccatcttcccgccggtgagtatgcggtgttgcgtatagagggtaaccatagcggcccactacccgaggatctcgaagaacgaatacaggaatccaccgggcgccacatgggggaaggtcacgttctgcgccgcttcctcaatacggagtatctgcctgcagccttcgagaagcgattcgatctctacgtgccgctcgcacca…	MTFQGRFDESIEPFEKLRAHALLAGIARERRKGWCIHLDGLADKQHIQAALLAEPLGTRILGLGQGHLPAGEYAVLRIEGNHSGPLPEDLEERIQESTGRHMGEGHVLRRFLNTEYLPAAFEKRFDLYVPLAPA
NODE_1208_length_43622_cov_19.6961_ID_2773	fig|857335.5.peg.353	NODE_1208_length_43622_cov_19.6961_ID_2773_20320_21354	20320	21354	+	Ferrochelatase, protoheme ferro-lyase (EC 4.99.1.1)	FIG00000345	atgcccagctttctgccagaacctcagcattcacaagacaatccggcacgcatcggtgtcctgctggtcaatctgggaacacctgaagcccccacgcctgcagcggtacgacgctatctgcgccagttcctctcggatccgcgtgtgatcgaaatcccgcgcctgctctggtggcccatcctcaacggaatcatcctgcccttccgcagtcgtgcctcagccgcaaagtacgcctcgatctggctcaaggaaggctcgccgctgcgccattacacggaattgcagacaaagctgctacggggttatttcacggccgccggccaagccgacatccaggttgaatacgccatgcgctacggagagccggcggtgcaatccgcgctgatgcgtctgaaggcc…	MPSFLPEPQHSQDNPARIGVLLVNLGTPEAPTPAAVRRYLRQFLSDPRVIEIPRLLWWPILNGIILPFRSRASAAKYASIWLKEGSPLRHYTELQTKLLRGYFTAAGQADIQVEYAMRYGEPAVQSALMRLKAAHCTRVLVLPLYPQYAGSTTGSVCDAVAQAMLCIRNLPELRIVRSFPGHPAYIQALAASVRRAWAQDGEPERLVMSFHGLPRATIERGDPYHRECLQTGRLLAEALGLDETRYLVTFQSRFGRTEWLQPYTEPSLVALARQGVSRVDVICPGFVSDCIETLEEIALEAKTAFLNAGGKSFHYLPCLNGDDGFIRLLRELANSHMQDWLVSP
NODE_1208_length_43622_cov_19.6961_ID_2773	fig|857335.5.peg.354	NODE_1208_length_43622_cov_19.6961_ID_2773_21539_21889	21539	21889	+	Mycobacterial phage holin, superfamily IV		atgatgttgctgttgcgctgggccctgaacgccgtagccctgatgctgatcccggagatcatcactgccatccaggtcagcagctataccgccgcactggccgcagcactgctgataggcctgctcaacgcgttgatccgccccctgttgctgttgctgacactgccgatcacggtgctgacgctgggatttttcgccctggtgatcaacgcgttgctgttctgggccgcctccgaactggtcgccggtttccatgtgaacggcttctggcctgccctgggtggggcactgctctacagcctgctgacgggactggtcagccttgcgctgggcgatcgccgtaaaggctaa	MMLLLRWALNAVALMLIPEIITAIQVSSYTAALAAALLIGLLNALIRPLLLLLTLPITVLTLGFFALVINALLFWAASELVAGFHVNGFWPALGGALLYSLLTGLVSLALGDRRKG
NODE_1208_length_43622_cov_19.6961_ID_2773	fig|857335.5.peg.355	NODE_1208_length_43622_cov_19.6961_ID_2773_21962_22627	21962	22627	+	hypothetical protein		gtggcacgtgacgtgacaagctttggcggccggctgctggcctatctggacatgctgttcgtggatcacggcatcttccgcgtgatctacaacaacctgcatgccctacccggcggcctctatcgctgcagccagcccagccctggccagatccgcaagtatcagcgccgtcatggcatcaagaccatcgtcaacttgcgcggcgccgacgacacgcgccgctatgcgctcgaagcgcaggcctgtgccgagcttggcatcaagctgatcgacttcaagggcatcctctcgcgcagcgcaccggaagtcgacgccgtgctgcgcgcgcaggcaatgttcgaccagatcgaatatccggcactgatccattgcaagagcggcgccgaccgtgccggcttt…	MARDVTSFGGRLLAYLDMLFVDHGIFRVIYNNLHALPGGLYRCSQPSPGQIRKYQRRHGIKTIVNLRGADDTRRYALEAQACAELGIKLIDFKGILSRSAPEVDAVLRAQAMFDQIEYPALIHCKSGADRAGFASALYRIFRRNEPVSQAKQELSWRYGHLRKSKTGILDFFFERSQADGAESPEEFLAWLTEHYEREALKQDFHAQGWADVLVDRILRRE
NODE_1208_length_43622_cov_19.6961_ID_2773	fig|857335.5.peg.356	NODE_1208_length_43622_cov_19.6961_ID_2773_23532_22681	23532	22681	-	Quinolinate phosphoribosyltransferase [decarboxylating] (EC 2.4.2.19)	FIG00000413	atgattgatttttccgaacaactgaatatcgagatccagcgtgcggtggccaatgcgctggccgaggacgtgggcaccggtgacctgaccgcgcgcctgatctcgccggagaccaaggcccatggtcgcgtgatcacgcgcgaggatgctgtgctgtgcggcacgcgctggttcgacgcagtattccgtacgctggatccgcaattcactgtggtgtggcatgcgcaggatggcgagcgcgtgagcgcgggccagagcctgtgtgacatcctggcgccagcgcgcaccttgctgaccgccgagcgcactgcgctgaatttcctgcaattgctctcgggcactgcaaccacggtggccgattacgtgactgccgtggcaggcaccaatgctgctgtggtg…	MIDFSEQLNIEIQRAVANALAEDVGTGDLTARLISPETKAHGRVITREDAVLCGTRWFDAVFRTLDPQFTVVWHAQDGERVSAGQSLCDILAPARTLLTAERTALNFLQLLSGTATTVADYVTAVAGTNAAVVDTRKTLPGLRLAQKYAVKKGGGLNHRIGLYDGVLIKENHIIAAGGVSAALMHARKLAPSNVFVEIEVETLAQLEEALAAGATMVLLDNMSLETMHEAVRINAGRPKLEASGGVSLQRVREIAETGVDRISIGALTKDVQAVDLSLRHIED
NODE_1208_length_43622_cov_19.6961_ID_2773	fig|857335.5.peg.357	NODE_1208_length_43622_cov_19.6961_ID_2773_24468_23623	24468	23623	-	Permeases of the drug/metabolite transporter (DMT) superfamily		ttgcgcggggtgttgctctttctttgcgcattgctgctgtttgcctgcctggatacgacgaccaagtatctgtcgcagcgttaccccgtcaccatgatcgtgtggatgcgctatgtggtgcatgcgctcctgatggcagtcgtgttgctgcccagcaaggggatgactctgatgcgcacgcatcgcaccggtctggtctgggtgcgcgccctgagccttgcggccatgtccctgttgatggggcttggcctgcagcgtctgcccgtggccgaagctaccagcatcggcttcacggcaccgatgctggtcgtgctgctggcgcggccggtgctgggcgagcggatcggatggctgcgtggtggtgcggtggcgctcggattcatcggcgtgttgctggtg…	MRGVLLFLCALLLFACLDTTTKYLSQRYPVTMIVWMRYVVHALLMAVVLLPSKGMTLMRTHRTGLVWVRALSLAAMSLLMGLGLQRLPVAEATSIGFTAPMLVVLLARPVLGERIGWLRGGAVALGFIGVLLVARPGGSLDLFGVAVVLCAAVCGAAYQLLSRVLSSSERAVTMLFYTALAGCAIFGPLMPWLWGGPPPSWLDVLLFASLGFYGGLGHLFFTQAYRYAPASLLAPVSYLQLLWAALTGFIVLGHVPEPMALLGMLVIMVSGALVAVGASRG
NODE_1208_length_43622_cov_19.6961_ID_2773	fig|857335.5.peg.358	NODE_1208_length_43622_cov_19.6961_ID_2773_25362_24646	25362	24646	-	LrgA-associated membrane protein LrgB	FIG00000822	atgattgagcgtctgggcggtttgtgggggcatctgcaggggctgccggtgttttggttgttgctgacgctgggcgtgttccagctggcgacgatgattgccaggcgtagcggcggctttccgctggccaatccggtcggcatgagcattctggcgctggtgctgttgctgcatttcacgggcacgccgtatgagcgttactgggcgggtgcacagtggctgcatctggtgctggcgccggccaccgtggctctggcggttcccttgtatctgcaacgtgcgcgcatcctgcgttttgcgaagccgctgctgctgacgctggtgctgggctcgctgctggcgatcttctcggcggtggcaatcggctgggcgctcggcgcgagcgagggcagcctgctg…	MIERLGGLWGHLQGLPVFWLLLTLGVFQLATMIARRSGGFPLANPVGMSILALVLLLHFTGTPYERYWAGAQWLHLVLAPATVALAVPLYLQRARILRFAKPLLLTLVLGSLLAIFSAVAIGWALGASEGSLLALAPKSATAPVAMGIVEKLGGIVSLTAALVILTGVTGAMLGLWLLDRLGVKDPAVRGFALGLASHGIGTARAFQESEETGAFAGLGMGLNALMTSVLVPVLYGLV
NODE_1208_length_43622_cov_19.6961_ID_2773	fig|857335.5.peg.359	NODE_1208_length_43622_cov_19.6961_ID_2773_25711_25355	25711	25355	-	Antiholin-like protein LrgA		atgctgaaaggatgcattgccttgctggcctgtctcgtggtgggcgagatcgtggtctatctgctgacgctgccgctacctggcgcggtggtcggtatggcactggcgttaggcttgctggtctggcgtggcggtgagccgccggccgaactgcgcgaggcctcgcaagggctgctgcagtatctgtcgttgcttttcgtgccggctggcgtcggcctgatcctgcatctggaccggctgcgtagcgaatggcttgccctgtcggtcgcggtggtgggtggcgcgctgcttacgattgccctgagtgccttgctgttgcagcgcctggtacgtaggggagggcgtacggatgattga	MLKGCIALLACLVVGEIVVYLLTLPLPGAVVGMALALGLLVWRGGEPPAELREASQGLLQYLSLLFVPAGVGLILHLDRLRSEWLALSVAVVGGALLTIALSALLLQRLVRRGGRTDD
NODE_1208_length_43622_cov_19.6961_ID_2773	fig|857335.5.peg.360	NODE_1208_length_43622_cov_19.6961_ID_2773_26217_25705	26217	25705	-	Ureidoglycolate hydrolase (EC 3.5.3.19)	FIG00001394	atgagtgcagcgcgcgtacccttgcgcgtcgagccgctgagtcgcgaggctttcgtgccctttggcgaggtgatcgaagcgggcaccacggcggatcagttcgccatcaacggcggcacctcgcagcgttttcacgatctggcgacactggagccgggtactgaaggccgcctgatcgtctcgattttccgtgcccagccgcgcgcgctgccgtttcctgtgcgtatgctggaacggcatccgaaggcttcgcaggctttcatgccgctttccggccggcctttcctggtggtggtggcgcctgccggggcgctcgatcccggtgcgatccgtgcctttctggcgcagggcacgcagggcgtgaatttcgcgccgggcacctggcatcacccgctgctg…	MSAARVPLRVEPLSREAFVPFGEVIEAGTTADQFAINGGTSQRFHDLATLEPGTEGRLIVSIFRAQPRALPFPVRMLERHPKASQAFMPLSGRPFLVVVAPAGALDPGAIRAFLAQGTQGVNFAPGTWHHPLLALESVSDFLVIDRDRPEENCDEQVLPQEFSLALEPAC
NODE_1208_length_43622_cov_19.6961_ID_2773	fig|857335.5.peg.361	NODE_1208_length_43622_cov_19.6961_ID_2773_27215_26214	27215	26214	-	Allantoicase (EC 3.5.3.4)	FIG00001876	atggccattgtcgaaaccgatccccaggcgcctgatttcgtgcgccgtcttcccaatcttgccgatccgcgcctgggcgcgcgtgccgtggcggccagcgacgagttctttgcgccgcgcgaccgcatgctgtcaccggagccagcggtgttcatcccgggcaagtacgatgaccatggcaagtggatggatggctgggaaacgcgtcgcaagcgcggccaggggcatgactggtgcatcgtgcggctggcacgccgtgcccgcatcctcggtgtggatatcgataccagccacttcaccggcaactacccgccgggggcttcgctggatgtctgccagagcgccgatgaagttccatccgagaatacggtgtggacgccgctactgcctgtgcaatcg…	MAIVETDPQAPDFVRRLPNLADPRLGARAVAASDEFFAPRDRMLSPEPAVFIPGKYDDHGKWMDGWETRRKRGQGHDWCIVRLARRARILGVDIDTSHFTGNYPPGASLDVCQSADEVPSENTVWTPLLPVQSLAGNSHHYRAIDNDGLWTHVRISIYPDGGIARLRVHGQPVLEAGADEIIDLAAAINGASVVAANNEHFGRASALLLPGRGVNMGDGWETRRRREPGNDWSIIALAQPGVIERIEVDTAHFKGNFPDACSLQAAFMPAATEQTLVTQSMFWSELLAPQKLKADAVHVFELPAGARISHVRFNIFPDGGVSRLRLFGRRSQA
NODE_1208_length_43622_cov_19.6961_ID_2773	fig|857335.5.peg.362	NODE_1208_length_43622_cov_19.6961_ID_2773_27910_27233	27910	27233	-	Transcriptional regulator, GntR family		atgccaagactttccagcgtcgccgcccagaccctgcaacgccagatccacgacggcgtgtatccgcacggccagccgctgcccgggcagcgcgagctggctgccagcctgggcatcagccgggctgcgctgcgcgaagccgtctccacactggaagcgttggggctggtgcgttcgcaggccggcaagggggtgtttgtcacccgaggcagctcccgtgctaccagtgagctgcctgccgggccgctggccctgccgccgcagcaggtgttccagttccgggcggtagtgaagccggccgctgccgcgctggccgcgcgccaggcggatgaggcggcccgtgctgtcctgcacgatgcgcaggcacgcatggaagccgcgctgcatgggctggatctg…	MPRLSSVAAQTLQRQIHDGVYPHGQPLPGQRELAASLGISRAALREAVSTLEALGLVRSQAGKGVFVTRGSSRATSELPAGPLALPPQQVFQFRAVVKPAAAALAARQADEAARAVLHDAQARMEAALHGLDLVSASKADLDFHLALAAQSANPLLNAAIHSLEAPIAYSLRLPFADPAGLWAPADEHRAVLLAIDAHDAQAAHAAMLTHLVRAAARVGISFELP
NODE_1208_length_43622_cov_19.6961_ID_2773	fig|857335.5.peg.363	NODE_1208_length_43622_cov_19.6961_ID_2773_28679_30145	28679	30145	+	GGDEF family protein	FIG01956123	atgacgtcaaccgcacttccgccggacgccttgccggcccttttcgaacacgctccaatcagcctctggctggaggatttcagtgccgtgcatgcgctgttcgaatcctggcgcgaacagggcgtggaggatctgcaggctcacttcgccgaggatctcgggcatgtggatgcctgcgcctcagccatccgagtattgcgggtcaactaccgaacgctggaaatgttcggcgcgcccgatttcacgactctcaatgaccggctcggcgacgtgtttcgtgacgacatgcgcacccagcacgcacgcgacatggtggccctgtggaatggcagccacggctttgccagccagagcgtgaactacgccctggatggccggcgtatcgacgtgctggtcaac…	MTSTALPPDALPALFEHAPISLWLEDFSAVHALFESWREQGVEDLQAHFAEDLGHVDACASAIRVLRVNYRTLEMFGAPDFTTLNDRLGDVFRDDMRTQHARDMVALWNGSHGFASQSVNYALDGRRIDVLVNVRILPGHEHDWSRVIVALEDITPRVRAQKQLERSERYALGLFEHSPVSLWVEDFSRIKQLLDELRRMGIEDFHTFLDVHPEFVTRCMQEIVVLDVNVQTLKTFGAENKEDILANLGRIFRDDMHQHFAEQLLDLWQDKLFTQRETINYSLNGQAVHVHMQFSVLPGHEQDWSLVLVSLTDITARKKAEAYLEFLGRHDALTKLSNRAYYEEELKRLTRKGSYPVSVVIADLNGLKIANDELGHSVGDDLLRRAGEALRKTVGEEIC…
NODE_1208_length_43622_cov_19.6961_ID_2773	fig|857335.5.peg.364	NODE_1208_length_43622_cov_19.6961_ID_2773_30149_30490	30149	30490	+	Membrane protein glpM		atgccttcactcctgctcaaggcggccatcggcgcggccgccgtcctcatcatcgccgtgctctcgcgcagcaaggtcttcttcatcgcggggctggtgccgctcttccccagcttcgcgctgatcgcccactacatcgtgggcagcgagcggagcggcgcggatctgcgcaccacggccatcttcggtctgtggtcgctgatcccgtatgccatctacctgcttacggtgatccagctcagcacccgcgcgccgctgtggctgacgctgctcgccgccacgctggcctggtgcctggccgccgccgtactgctcgcggcctggatgcgctggcacggctga	MPSLLLKAAIGAAAVLIIAVLSRSKVFFIAGLVPLFPSFALIAHYIVGSERSGADLRTTAIFGLWSLIPYAIYLLTVIQLSTRAPLWLTLLAATLAWCLAAAVLLAAWMRWHG
NODE_1208_length_43622_cov_19.6961_ID_2773	fig|857335.5.peg.365	NODE_1208_length_43622_cov_19.6961_ID_2773_31849_30500	31849	30500	-	sensor histidine kinase		ttgggtggcatcgcgctggcgatgctgctggtggggctcgcgctcacggccctgttccgcgagcatgtggtgaaccagttccaggcggcactggcgcgccagctggaccaactggtgatcgagctcgaattcgatgacgggcggccccatatcgatcccgaagtcatgctcgatccgcggctgtcgaagccgtattccgggctgtactggcagatcgacgtgctggggccgggcacggcgacgatctccggtgcgcagcgttcccgctccctgtgggatgccgatctcgtgttgcccgagcctctgccaccttccgtcacgggcatggtgatcggccgtgcggaggggcccgcgcacgaatccctgctgctgctgcagcgggtggtccgcatggaggaa…	MGGIALAMLLVGLALTALFREHVVNQFQAALARQLDQLVIELEFDDGRPHIDPEVMLDPRLSKPYSGLYWQIDVLGPGTATISGAQRSRSLWDADLVLPEPLPPSVTGMVIGRAEGPAHESLLLLQRVVRMEEWPDRAFRLIVAGDLRFNLDATKRFGLALTFALGILFVLLGLSAWAQVSIGLRPLREMQSALKAVREGRAERMAGRFPQEVSPLVEDFNLVLERNAEVMQRARALAGNLAHALKTPLAVLENEVDGLEGRQQPADVLLLKEQLAQIRRQIDWHLSHARVGAARGLPGWRTDAREVLAGLLRVFERVFAERALTFHVTTTEGMPLFAGEEQDLQEILGNLLENACKWANANVWITLTPDETPVGLRIRIEDDGPGIAPDRLDSVRQRG…
NODE_1208_length_43622_cov_19.6961_ID_2773	fig|857335.5.peg.366	NODE_1208_length_43622_cov_19.6961_ID_2773_32585_31923	32585	31923	-	Two-component response regulator	FIG01962128	atgaagatcctggtcgtggaagatgaaccggccctgcagcggcaactgacacgcctgctggaggagagcggctatgtggtggaaaccagtggcgaggggcgggacgcgcagtatcgtggcgagagcgaggcgttcgatgccatcgtgctggatctgggactgcctggtcgcgatggcctgagcatcctgcgtgcctggcgtgaggctggcaaggctgtgccggtgctggtgctgaccgcgcgcggcgcctggcacgagaaggtggaaggcatggatgccggtgccgacgattacctctccaaaccattccacgggccggagctgctggcgcgcgtgcgcgccctgatccgccgcagcatcgggatcgcctcgccggtattgcgctgtggcgacgtggag…	MKILVVEDEPALQRQLTRLLEESGYVVETSGEGRDAQYRGESEAFDAIVLDLGLPGRDGLSILRAWREAGKAVPVLVLTARGAWHEKVEGMDAGADDYLSKPFHGPELLARVRALIRRSIGIASPVLRCGDVELDTRNSQVSLGGQPVALTSQEFRLLQYLMHHPGSVVSRAELTEHLYAQDYERDSNTLEVFVGRLRKKLGADLIQTVRGMGYRLSGHV
NODE_1208_length_43622_cov_19.6961_ID_2773	fig|857335.5.peg.367	NODE_1208_length_43622_cov_19.6961_ID_2773_32811_32617	32811	32617	-	hypothetical protein		gtgcaggcctgggtgagcggcttctgcggatgcgagatactggaagccaaactgcatgacgagaaggaagacggacagcgttttctggtctacgagatcaaggccctgaggccggacggacagatactcaagctggagatgcatgcccgcacgggagcgctgctgaaggtcaagcgcaagggatttgcgcattga	MQAWVSGFCGCEILEAKLHDEKEDGQRFLVYEIKALRPDGQILKLEMHARTGALLKVKRKGFAH
NODE_1208_length_43622_cov_19.6961_ID_2773	fig|857335.5.peg.368	NODE_1208_length_43622_cov_19.6961_ID_2773_32884_33024	32884	33024	+	hypothetical protein		gtgcccgcatggagcagcccccagcagcaaaggcagatcatcaatgaggacgtgatgcgtgcggaaagcatggcgatgccggcaagccgtgtcgatggcgaaaaacggaaggatgcctgcgcctgcctgaacgcaggctga	MPAWSSPQQQRQIINEDVMRAESMAMPASRVDGEKRKDACACLNAG
NODE_1208_length_43622_cov_19.6961_ID_2773	fig|857335.5.peg.369	NODE_1208_length_43622_cov_19.6961_ID_2773_33164_33496	33164	33496	+	hypothetical protein		ttgtctgcgctgctcatcggcagcctgccggccatggcgcagtatgtcggtccccatgccgcctccagcaccgtccagcagctcggtggcttgatcggcaaggatcgcttcgtcacgctcaagggcaacatcacccggcatgtcggcaaggatctttacgaattcagcgatggcaccggcagcgtctatctggacatcgaccgcaagcactggcgctggccggcggatacgtccatcgatcacaccacgccggtagagatccgtggcaaatacatcagccaggctttcggcccggacaaggtcaaggtcagcgacgtcaggctcgtcaagtga	MSALLIGSLPAMAQYVGPHAASSTVQQLGGLIGKDRFVTLKGNITRHVGKDLYEFSDGTGSVYLDIDRKHWRWPADTSIDHTTPVEIRGKYISQAFGPDKVKVSDVRLVK
NODE_1208_length_43622_cov_19.6961_ID_2773	fig|857335.5.peg.370	NODE_1208_length_43622_cov_19.6961_ID_2773_37093_33515	37093	33515	-	putative exported protein		atgctgtctgaactcatttgggccagcgtgtcgcgtggccgtctgaagtggcccgcacggatcctggcagtgctggccgtgctggtgggcgtgctgggatttttcgtggcgccgtcggtgctgaaaccgatcatcgagcgcgaggccagccaggcgctgggccggcaggtatcgctgggccggctggcgctgaacccctttgccctgagcgtgaccctggatgacctgaaaatcgccgaggctgacgggcaaggcgatttcatcgcactgggcaaagcctacgtcgatttttctgccaactcgctgttcgagcgtgcgccggtgatccgcgaactgcgcgtggccggcctgcgcctgaacgtggcgcgcctggctgacgatcgttacaacttcagcgat…	MLSELIWASVSRGRLKWPARILAVLAVLVGVLGFFVAPSVLKPIIEREASQALGRQVSLGRLALNPFALSVTLDDLKIAEADGQGDFIALGKAYVDFSANSLFERAPVIRELRVAGLRLNVARLADDRYNFSDLIERFKPAPDAPETPPARFALYNIQLQDGDLRFDDRVTGQQHSIAALQFGLPFVSNLPSRIDTFVVPHLSADIDGSPLVLDGEVKPFADRREAHLALQLQPLDLTRYLAYLPQMPLALKQGELGADLRLLWSEDDKGAQTLALEGALTLDKLDLKSATGEEFFKLEHLKLALKRVEPLAQPMRIELASLALEQPQLNLARDARGRLNLPQATADTEASVASKQAPTGSAPAPVFSLDELSLRGGVVHWADAAVPGGYRGGARDIEL…
NODE_1208_length_43622_cov_19.6961_ID_2773	fig|857335.5.peg.371	NODE_1208_length_43622_cov_19.6961_ID_2773_38260_37220	38260	37220	-	PUTATIVE ZINC PROTEASE PROTEIN	FIG01339007	gtggccggcaaggcgccgatgaagcgcgcctgcgcggggctgctgctcctgttgctcggtggctgcgccaacctgggttactacggccagtccgtgcgcgggcagctgtatctgtggtggcgtgccgcgccggtggagcaggtgctggccgatccggaggtttccgcccccttgcgtgcccgcctgcaaagcagccaggcgatacgcgattttgccgtgagccacctcgatctgccggacaaccgcagctaccggcgctatgccgatttgcagcgcccctttgcggtgtggaacgtgatcgccacgccgccagacagcctgaccccgcatccgttctgcccgcctctggtcggctgtttgccttaccagggttttttcagcgaagccgaagcactgcgc…	MAGKAPMKRACAGLLLLLLGGCANLGYYGQSVRGQLYLWWRAAPVEQVLADPEVSAPLRARLQSSQAIRDFAVSHLDLPDNRSYRRYADLQRPFAVWNVIATPPDSLTPHPFCPPLVGCLPYQGFFSEAEALRRADALRAEGLETITYGVAAYSTLGWFADPLLNTFMGLPEPELAGLIFHELTHQQVFVKDDVAFNESLASFVEAQGIREWLGTRPEELAAWQTRRARGDRLRGLVLAARDELAALYAAHPADWAARKAMRLARLREDLAALWREAGAEPRGLWFDTPLGNPQLTLVATYHAWEPAWQRLFVASKQDWPAFWQAVREIAQRSSAGREACLRGESC
NODE_1208_length_43622_cov_19.6961_ID_2773	fig|857335.5.peg.372	NODE_1208_length_43622_cov_19.6961_ID_2773_39524_38268	39524	38268	-	Small-conductance mechanosensitive channel	FIG01341998	atgtacgctgcaatggaacaactggctgcccagctggcagagaacccgctgctctacacgctgattgcgctcagcctgttgttgtcgctttcctggctgggaaactggatcgtcaaacgaattctgctggtcgccctgttccgtgccctgcgggccagtccgttgggcgaggtgcggcagggcgacgatctggattttattgcgcgcctggcgaatgtggtgccggcactgatcatctccgaaggcatcctttacgtgccgggcctgccggaagcgctggtgacggtggtcagcaacgtctcgcgcgccttcacggtggtcaccgtcgccatggcgatcagccatgtgctgacattggtgaatcagctctacgagcgccgcccggacgcacagaacaag…	MYAAMEQLAAQLAENPLLYTLIALSLLLSLSWLGNWIVKRILLVALFRALRASPLGEVRQGDDLDFIARLANVVPALIISEGILYVPGLPEALVTVVSNVSRAFTVVTVAMAISHVLTLVNQLYERRPDAQNKPIKGYLQLLKLVVYVVATILMVALLLDRSPLILLSGLGAMAAVLMLIFQDTLLSLVASVQISSNDIIRVGDWVEMPQLNADGSVIDVALHTVKVQNWDKTITTIPTRRFITDPFKNWRGMQESGGRRIKRSLMIDQQSVRFLDEGEKTSLRRFRLLQDYLEQKQQEIEGWNARLQEQGRETVNTRRITNLGTFRAYVERYLRHHTQIHQDMTLIVRQMAPTPEGLPLEIYCFTATTAWVAYEGIQADIFDHLLAIIPEFGLRLFQQ…
NODE_1208_length_43622_cov_19.6961_ID_2773	fig|857335.5.peg.373	NODE_1208_length_43622_cov_19.6961_ID_2773_40379_39681	40379	39681	-	Pectinesterase (EC 3.1.1.11)		atgtgggcacaggccgatggattccagttgaagaacctgacggtgaccaacacgctgctggacaccatcaaggatgaaggccaccaggccgtggccctgcgtacggatggcgacaggacccagctggagaacgtgcgcctgataggccgtcaggacaccttcctggtcaacgtgggcgaggcgccgacgccgaccaacaaggtcggcacctatccgttggacaagatcgcacgtgcccacatcaaggattcatacatcgagggggatgtcgacttcgtcttcggccgcgccaatgcggtgttcgacaactgcgagtttcatgtcgtctcctcgcgtcgcagtgtgccggcgatcgtgttcgcgccggataccgtgccggcatcctcgctgggtttcctg…	MWAQADGFQLKNLTVTNTLLDTIKDEGHQAVALRTDGDRTQLENVRLIGRQDTFLVNVGEAPTPTNKVGTYPLDKIARAHIKDSYIEGDVDFVFGRANAVFDNCEFHVVSSRRSVPAIVFAPDTVPASSLGFLVINSRITGDAGHQALKKSKLGRSWDQGAGGTGYLVGQSPNGQLLIRDSYIDASFDVDAPWDKAATTGRPHKGNIAAERKLDDPAYNRLWEFGNYGPGVK
NODE_1208_length_43622_cov_19.6961_ID_2773	fig|857335.5.peg.374	NODE_1208_length_43622_cov_19.6961_ID_2773_40973_40389	40973	40389	-	Pectinesterase (EC 3.1.1.11)		atgaaaaagttggcggcgcccgcactggcggtggttttcctgttgtccctgaatgcctgtagcttgatgaattccagaccttcctcaccgcaagtcgcaccgggttctgccagtcggccggtgctgtccgccaccgaggccgcccgtttcatgccggcacgctatttcgcccagcgtggcagcctgtccgcgccggtgactgatccctgggcgccggctgcgatcgatcttgccggcgtgaagccggatttcaccgtcggcaaaggcggcacgcatgccacggtacagcaggcggtgaacgccgcaatcgccggtggcaagcgcacccggcaatacatccgcatcctgccgggcatccataccggtgcggtgtatgtgccgatcgatgcaccgccgttc…	MKKLAAPALAVVFLLSLNACSLMNSRPSSPQVAPGSASRPVLSATEAARFMPARYFAQRGSLSAPVTDPWAPAAIDLAGVKPDFTVGKGGTHATVQQAVNAAIAGGKRTRQYIRILPGIHTGAVYVPIDAPPFTLFGTGKPEEVDIQLTLDARTPPRAYIAAVSPAGQFKAGEPAWEMYKVCAEQNPDKPMDTP
NODE_1208_length_43622_cov_19.6961_ID_2773	fig|857335.5.peg.375	NODE_1208_length_43622_cov_19.6961_ID_2773_42267_41236	42267	41236	-	FIG00758123: hypothetical protein	FIG00758121	atgaagatcacgcatgcgtcgctggaggaggctgctcgccaggggctgatcggggtcgggcaggtggcgccgctgtgggatttcctgcaggcgcagacggcggatcagccctcgttccgcttcacgcacatcctctactacttcggtggcctgatcgccatcggggcgatgacgctgttcatgaatctgggatgggaacgctttggcggctgggggctgttctggatcgcgctggcctatgcgggagccgggctgtggctgacggagcatttcctgcatcgcctgaaactggcgattcctgcaggcatcgcggcagctttcgtggtggcgctcgcgccgctggcgatctacggcttgcaggtagccttcggctggtgggcggacgggcgcgtctaccgt…	MKITHASLEEAARQGLIGVGQVAPLWDFLQAQTADQPSFRFTHILYYFGGLIAIGAMTLFMNLGWERFGGWGLFWIALAYAGAGLWLTEHFLHRLKLAIPAGIAAAFVVALAPLAIYGLQVAFGWWADGRVYRDYHAYIDWRWLIMELGTLAVGAVMLWRYRLPFLVMPVAATLWYMSMDLAPFLFGATVDWEMRKFVSLWFGLLMILFAFWVDVRSRQARDYPFWLYLFGVLAFWGGLSMLRSDSELGKFLYLCVNLLMIGVGATLARRVFVVCGGLGAAGYVGHLAYEVFRDSMLFPFLLTLIGLGVIWLGILWQRREEAIAARLRAFLPAPLRALVARRH
NODE_1208_length_43622_cov_19.6961_ID_2773	fig|857335.5.peg.376	NODE_1208_length_43622_cov_19.6961_ID_2773_42489_42373	42489	42373	-	hypothetical protein		atgatgtcggtctgtgcctgcgtcatggcggccctggtcgcggcgcaggatcaggtcgtcgtggggccgcaaggagccagcaggcatgcaccacccctgccgtttttctgtctttga	MMSVCACVMAALVAAQDQVVVGPQGASRHAPPLPFFCL
NODE_1208_length_43622_cov_19.6961_ID_2773	fig|857335.5.peg.377	NODE_1208_length_43622_cov_19.6961_ID_2773_42510_43571	42510	43571	+	Myo-inositol 2-dehydrogenase (EC 1.1.1.18)	FIG01583289	atgcatactcaaggttccggcaagacgatcggcttcggcctcatcggcgccggcatgatcgccaactatcacgcggcagccatccaggcgctcgccgcacaccacaacgtgcgtctggtcggcatcgcgtgcaggacggccgccaccgctgagcagttcgccctcaagcacgggctgccgttccataccagcgatacggccgcgctcgtggcccatccggacatcgacgtcgtctgcatcgtcacgcccagcggcgcgcacctcgaaccggcactgcaggccatcgctgccggcaagcacgtggtcgtcgagaagccgctggaaatcagcgtggcgcgcgtcgacgccatgctggcggcggccgaccgcgccggcctgatggtcgccgccatcttccag…	MHTQGSGKTIGFGLIGAGMIANYHAAAIQALAAHHNVRLVGIACRTAATAEQFALKHGLPFHTSDTAALVAHPDIDVVCIVTPSGAHLEPALQAIAAGKHVVVEKPLEISVARVDAMLAAADRAGLMVAAIFQARFSEGARALKAALDRGRFGRLSLCSAYVKWYRSKEYYKGWKGTLALDGGGALMNQAIHAVDLLQWLAGMPSEVFAWTTRRVHTGIEAEDTACASLRFAHGALGSIEATTAAWPGWERRIDICGEFGSASIEDDRIVRWDFREAEPGDAALLAANGGQAQSGAGAPDQISFHGHLRQLEEVVLALEGQAPLSVSGRDARNTVSLVCGIYESAKRGVPVQL
NODE_12094_length_7718_cov_6.98238_ID_24991	fig|857335.5.peg.378	NODE_12094_length_7718_cov_6.98238_ID_24991_721_116	721	116	-	Small-conductance mechanosensitive channel	FIG01341998	atgaacaaataccttcagacaatccaggcaaacctgccacagtgggccatcgaatggttcgacgttttctccgtcgtcctgcaggtcgtggccatcatgctggctgcatggatcacgacacgcatcgcccggcacttcatcaagcgcctgaccaccacctattccttccctcctcgtgtcgtccagctctcgcgtcgcgtcgtcagcctgctgatcttcagtggtgccctgctctggtcgctggagcgcatgggcgtttccggttcggtgttatggacagccttcacgggcttcgcagccgttggcgccgtagccttctttgcagcctggagtgtgctttccaatcttttctgcgccctgttgatctacaccacccgcgccttccgtgcaggagatctg…	MNKYLQTIQANLPQWAIEWFDVFSVVLQVVAIMLAAWITTRIARHFIKRLTTTYSFPPRVVQLSRRVVSLLIFSGALLWSLERMGVSGSVLWTAFTGFAAVGAVAFFAAWSVLSNLFCALLIYTTRAFRAGDLVELVEKGNEPGIKGRVLDINLVYTTLLESGDHTHGVTLQLPNSMFFQRALRRWHGEAAENARPEGPAS
NODE_12094_length_7718_cov_6.98238_ID_24991	fig|857335.5.peg.379	NODE_12094_length_7718_cov_6.98238_ID_24991_1378_971	1378	971	-	TolA protein		atgaaccgacagaccctctccaccctgttcgcgtgccttctcgcactctctatcaccgcatgcggcaagcaggagtccgccgctgaagccagcaaggaagctgccaccgaagcaatggaaaaagccggcgaagccatcgacaaggccggcgaagcagcggccgaggccaccgcttctggcgttgaagccgcgaaggatgcggcggcagatgccaagtccgctgcaggcgaagcctgggatgccaccaaggatgcagcatccgccgctgccgacaagaccaaggaagtcgccggagagatcagggatgcaaccggcaacgccatcgacaagacaaaggaagcagcaggaaatgccaaggatgcagccggcaatgctctggacaaggccaaggaagccgtc…	MNRQTLSTLFACLLALSITACGKQESAAEASKEAATEAMEKAGEAIDKAGEAAAEATASGVEAAKDAAADAKSAAGEAWDATKDAASAAADKTKEVAGEIRDATGNAIDKTKEAAGNAKDAAGNALDKAKEAVGK
NODE_12094_length_7718_cov_6.98238_ID_24991	fig|857335.5.peg.380	NODE_12094_length_7718_cov_6.98238_ID_24991_1621_1962	1621	1962	+	Alkylphosphonate utilization operon protein PhnA	FIG00000968	atgagcgcactgcctgcctgcccccaatgcaattccgcctatacctacgaggatggagcgatgctggtctgtccggaatgtgggcacgagtggcagccgggtggcgaggccgctggtgcaggcgacgaactggtggtcaaagatgccaatggcaatctgctggccgatggcgacagtgtcaccgtgatcaaggatctgaaggtcaagggatcctcttcggtggtgaaggtgggtaccaaggtgaagggaatccgcttggttgagggcgatcacaacatcgattgcaggatcgatggtatcggcgcgatgaagctcaagtcggaattcgtgaagaaggcctga	MSALPACPQCNSAYTYEDGAMLVCPECGHEWQPGGEAAGAGDELVVKDANGNLLADGDSVTVIKDLKVKGSSSVVKVGTKVKGIRLVEGDHNIDCRIDGIGAMKLKSEFVKKA
NODE_12094_length_7718_cov_6.98238_ID_24991	fig|857335.5.peg.381	NODE_12094_length_7718_cov_6.98238_ID_24991_2274_1972	2274	1972	-	hypothetical protein		atgcgcacccacaagattcttcacggctgggatctcgtacgcatcggcgtggtcgacgagttcgaactagacgaagatccgcgccagatagccaaacgcctgcagagggccggcgtggtcgagcacttcaaccaccgctatgcgctgttcacacttgcgcgtcgtgccagcggcgattgccattatctgaatgccaagacccgccgctgcaccgtttacgaacgacggcccgacacctgtcgcaaacacccggagacgctggggccgcgccccgggcactgcgcctacagacaaaaggcctga	MRTHKILHGWDLVRIGVVDEFELDEDPRQIAKRLQRAGVVEHFNHRYALFTLARRASGDCHYLNAKTRRCTVYERRPDTCRKHPETLGPRPGHCAYRQKA
NODE_12094_length_7718_cov_6.98238_ID_24991	fig|857335.5.peg.382	NODE_12094_length_7718_cov_6.98238_ID_24991_2675_2274	2675	2274	-	Hypothetical protein		atgagtactcaagacgaataccaggaacgacgcaaacaccagcgttttgcagcccaacgcgatggcaagccctgtatcgacatcctggtcgcaggaaaacggatcacgctgaacgatctctccatcgatgggttcagcctcccgcccgacgaagccctcgtggaaggcgaaaccttcgatttcgagatgcgcctgatcgacggttttggtgaccgcatccgtgggcaagccattgccgtaaacgaagtcaacggcctcatcggctgtcagttcgtagacctggatcccgcccaacagcgagttcttgaagaatggctcatcgtgatcgtgatctgtggagcttcggtacggctcacgccggccgacgcggaagccatcgtcaagggcccctcgctgatc…	MSTQDEYQERRKHQRFAAQRDGKPCIDILVAGKRITLNDLSIDGFSLPPDEALVEGETFDFEMRLIDGFGDRIRGQAIAVNEVNGLIGCQFVDLDPAQQRVLEEWLIVIVICGASVRLTPADAEAIVKGPSLI
NODE_12094_length_7718_cov_6.98238_ID_24991	fig|857335.5.peg.383	NODE_12094_length_7718_cov_6.98238_ID_24991_3062_2688	3062	2688	-	acyltransferase family protein		ttggcactcatcaccctgggggcactgctattcgaacaacgcccgcgcctggccctggcgttcggctgtgccatgttgcttgcattcgctgcgcgccatcctgcgcatcgccctacctgggcaccgatcgccctgctcggccggatttcctattccgtattcctggtgcactacccggtctgcctgctggtgaatgccgcctttgcacactgggtggcacccgagccctggctgcaactcggcggcatgttgctggcctggtggctcagcctcacggccggctggttgttccaccactacgtggaaacctggctgacccgccacacgacttccgctaccattgcccggccgcatcaggcgcacttcaacacctag	MALITLGALLFEQRPRLALAFGCAMLLAFAARHPAHRPTWAPIALLGRISYSVFLVHYPVCLLVNAAFAHWVAPEPWLQLGGMLLAWWLSLTAGWLFHHYVETWLTRHTTSATIARPHQAHFNT
NODE_12094_length_7718_cov_6.98238_ID_24991	fig|857335.5.peg.384	NODE_12094_length_7718_cov_6.98238_ID_24991_3752_3105	3752	3105	-	Acyltransferase 3	FIG01307861	atgcgcaccgcgcccaatcctctgatcgacacgctcaaggctcttgcctcgcaactcatcgtcctgcatcacttggcgttctacggcccgatgtcggaccacgcctacgccccggatctgatcgactggctgtacgactacgcacgcatggccgtgcaatgtttcctggtcatcggcggctatctggccgcacaatcccttgcaccctcaggacatatcaccaaacccaagttcacgctgcccgggctgctctggaaacgctatctgcgtctggctctgccgctgttcgccgccctgggactggccattgcggcagcggccctcgtacggacaatccatcccctgccagacacccccactgcgcctgcgctggggcaactggtggcgcatcttctcctg…	MRTAPNPLIDTLKALASQLIVLHHLAFYGPMSDHAYAPDLIDWLYDYARMAVQCFLVIGGYLAAQSLAPSGHITKPKFTLPGLLWKRYLRLALPLFAALGLAIAAAALVRTIHPLPDTPTAPALGQLVAHLLLAQQILGHESLSAGVWYVAIDFQLFALFAALMWLGRHAGRFANFAPLLVLSLTLASLYGFNRQPELDIWAPYFFGAYGLGITV
NODE_12094_length_7718_cov_6.98238_ID_24991	fig|857335.5.peg.385	NODE_12094_length_7718_cov_6.98238_ID_24991_5399_3801	5399	3801	-	CONSERVED MEMBRANE PROTEIN		atggccaagccaaagaaccgggaaaaacaacccgaaaccacggaacagacctcgccgatttccccaagccgtatcggcgcgcagttcgacgccgtttccgcgcgcatcgaaaccgtgcccgcctggctgcgcacaacgctgtgcatggcgctcgtgctgatcatcggcctgatgatgtatttcgcgggccatgacaagccgccccacgccttctgggacgagaactatcacgtcacctcggcacagcgctacatcgacggcatcgcccacatggaaacccacccgccgctgggcaagctgctgattgccgccggcgaggcactcaccggggccaatgccgatatcgacaagagcgccctggtacgggacaagtacatttccggcgacaacctgccggaa…	MAKPKNREKQPETTEQTSPISPSRIGAQFDAVSARIETVPAWLRTTLCMALVLIIGLMMYFAGHDKPPHAFWDENYHVTSAQRYIDGIAHMETHPPLGKLLIAAGEALTGANADIDKSALVRDKYISGDNLPEGFSFAGMRFMPSLFGAFAAVMFFGLMFALTDNRFIALLLSSLYLFENAFIVHFRAVHLDSFQMFFCLGALWLFVRLWKREGAIPWQQYAALGALCGLGIMVKVNAALLLALFPVLYFKDAGARAGLSLAGHARHFLTKSGAATAALAIVALVVFGLHGLIADQSPSPRDPAGQKDLAHMSATYKDYVNLHQSMTPSVLFAISRDYFNFMQVDNKGVPKLDVCKPGENGSHPMNWPAMNKTINYRWDSANGMTRYVQLVGNQFSWYL…
NODE_12094_length_7718_cov_6.98238_ID_24991	fig|857335.5.peg.386	NODE_12094_length_7718_cov_6.98238_ID_24991_5570_7342	5570	7342	+	Lipoprotein releasing system ATP-binding protein LolD	FIG00000771	atgtcgccttccgggtccgaacatttcagttttcgggacttgccgcgtgctctgtggtttttcctcgccgaagagcgctggacctaccttttcttcttcttcgtgctgctcctggtgatgttctacaccctggtgccgccgctgctgatcggcatgatcgccaacttcctgatcggcttcatgcaagcggaagagagcgtacgccctagtgcgacgacgctgttctggctggtggcgttgctggcgggctcgtacgcggtggtggcgctggtgcgtctgtccagcaagcgcatgctgggcaagatcagtttgaatgcgcgctaccgcgccaaggtctggggattcgagcggctgttgagctattcactatcctggcaccagcaggaaagcaccggcaac…	MSPSGSEHFSFRDLPRALWFFLAEERWTYLFFFFVLLLVMFYTLVPPLLIGMIANFLIGFMQAEESVRPSATTLFWLVALLAGSYAVVALVRLSSKRMLGKISLNARYRAKVWGFERLLSYSLSWHQQESTGNKAQRILTGAEAVREWTSEVINSLTGAFAAFVGSLVACMLLHPAFILFFVYYLGVLIAIEGYFDHRISRLSDRINKSLENASGSFVESASNILAVKAMGAANNMTGSIAQREELARQLSYERLRLSNTKWMCFQIHNSVSWGFYLLVIGFMVMKGHLLPGFFLTYAAYFDRLRDSSVEFTDRIQMMIERKSNLGRMMSIFWGKNPLARGEKPFPAQWDAITLQDAVFRYGDKPAVGPLSLTIPRGEIIGVAGHSGSGKSTLIKLLLG…
NODE_12111_length_7697_cov_6.65598_ID_25023	fig|857335.5.peg.387	NODE_12111_length_7697_cov_6.65598_ID_25023_474_34	474	34	-	partial Cytosol aminopeptidase family		atgatgtatcgcattgagtatcacgggaaactccttgaagggtttaatcccgagatcgtgcgcatggaggtcgccgtacgtttgcgtgaggatcaggtgcttcgcctgttctccggtgaacgcgtggtgctcaagaaggccgtcagcgaaggtgcctgtgagcgttacattgccgagcttcggcgtatgggtatggacgcggccctggtgccgctggatgtttcgccgccgcctgcagccatgctgacttatgcagtggttttctggggcaatctactgaccggtttcgagcgtcctgcagtgatgggtgccgcagcgcgtcgtttcaagttggcccctgcgcaattgatgcagatcttttccggcgtgaaggtcgtactcaagcggggcgtcagtacg…	MMYRIEYHGKLLEGFNPEIVRMEVAVRLREDQVLRLFSGERVVLKKAVSEGACERYIAELRRMGMDAALVPLDVSPPPAAMLTYAVVFWGNLLTGFERPAVMGAAARRFKLAPAQLMQIFSGVKVVLKRGVSTETGARWIESPRVS
NODE_12111_length_7697_cov_6.65598_ID_25023	fig|857335.5.peg.388	NODE_12111_length_7697_cov_6.65598_ID_25023_2208_724	2208	724	-	Glutamate synthase [NADPH] small chain (EC 1.4.1.13)	FIG00007957	atgggaaaagttaccggttttctcgagtttgagcgtcaggacgaaggctatgaagcgcccgaagctcgcaagaggcattacaaggaattcgtactcgcgctgagcgacgaccaggccaaggttcagggcgctcgctgcatggattgtggcattccgttctgcaacaacggttgccccgtcaacaacatcattcctgactggaatgatctggtttacaagggcaactgggagcaggccatcggtgtgctgcattccaccaacaacttcccggagttcaccggccgtatctgtccggcaccctgtgaagccgcctgcacgctagggatcaatgccgcacccgtgggcatcaagtccatcgagcatgcgatcatcgacaaggcttgggagcacgattgggtt…	MGKVTGFLEFERQDEGYEAPEARKRHYKEFVLALSDDQAKVQGARCMDCGIPFCNNGCPVNNIIPDWNDLVYKGNWEQAIGVLHSTNNFPEFTGRICPAPCEAACTLGINAAPVGIKSIEHAIIDKAWEHDWVQPQPAPIKTGKKVAIVGSGPAGLAAAQQLARVGHDVTVFEKSSRIGGLLRYGIPDFKLDKAIIDRRAKQLEAEGVVFKTSVYVGDADLPKGINTDAKEKVSPKKLLKEFDAVLITAGSEVPRDLPVPGRELEGVHFALEFLIPQNKANAGDKLKEQIKVAGKNVVVIGGGDTGSDCVGTSSRQEAASILQIELMPKPPVQENKPLTWPYWPNKLRTSSSHDEGCQREWGVTTKEFKGENGKLKSMVIAQVEWKRDEKIGQMKMSEV…
NODE_12111_length_7697_cov_6.65598_ID_25023	fig|857335.5.peg.389	NODE_12111_length_7697_cov_6.65598_ID_25023_6906_2230	6906	2230	-	Glutamate synthase [NADPH] large chain (EC 1.4.1.13)	FIG00000539	atgcaagagcgccagggactttacgacccagccaacgaacacgatgcctgtggtgtcggctttgtggcccatatcaagggacacaagagtcacgacatcattcagggcggcctgaagatcctcgagaacatcgatcaccgcggtgcagtcggggccgatccgctgatgggcgatggcgccggcatcctgatccagattccggatcagctttatcgcgacgagatggcggtgcagggcgtcaagctgcctccggcgggcgagtatggcgtgggcatggtattcctgccgaaggaagaggcttcccgcctggcctgcgagcaagaactggaacgggcagtgcgtgccgaggggcaggtgctgctgggctggcgtgatgtgcctgttgatcacgagatgccg…	MQERQGLYDPANEHDACGVGFVAHIKGHKSHDIIQGGLKILENIDHRGAVGADPLMGDGAGILIQIPDQLYRDEMAVQGVKLPPAGEYGVGMVFLPKEEASRLACEQELERAVRAEGQVLLGWRDVPVDHEMPMSPRVRAKEPVIRQIFVGRGPDVMVTEALERKLYVIRKMASHAIQQLGLKYGKEYYVPSMSARTVIYKGLLLANQVGEYYKDLTDPRCVSALSLVHQRFSTNTFPEWPLAHPYRMVAHNGEINTVKGNFNWLRAREGVMKSAVLGDDLAKLFPVVYEGQSDTATFDNCIELLVMAGYPLAQAAMMMIPEAWEQHELMDENRRAFYEYHAAMMEPWDGPAAIAFTDGRQIGATLDRNGLRPARYIVTDDDIVIMASEAGVLPVPESK…
NODE_12111_length_7697_cov_6.65598_ID_25023	fig|857335.5.peg.390	NODE_12111_length_7697_cov_6.65598_ID_25023_6865_6984	6865	6984	+	hypothetical protein		gtgttcgttggctgggtcgtaaagtccctggcgctcttgcatgctcggtctccggaagtcactaaccacaagccctgcgcaaggacgcacgacccacagttatcaaagcaaaggtgctga	MFVGWVVKSLALLHARSPEVTNHKPCARTHDPQLSKQRC
NODE_12111_length_7697_cov_6.65598_ID_25023	fig|857335.5.peg.391	NODE_12111_length_7697_cov_6.65598_ID_25023_7530_7213	7530	7213	-	Sensor histidine kinase		atgttatcccgagcgctgggctgcctgctttcgcatgctgtggaggtcacgccttccggaggcgtgttgctgggctgccgtgcgcgaggcgggcatgtcgtgatcgaggtctgggattcccgtccagggattcctcaggcgcagcgtgccgatctgttcacgccggggactgcatatggacagaatctgacggatcgtggcctggggctggtgcttgcacatcgtttgtccagcgccatggcggggcagctttctgtgtactgttccgcggcagggggttgtgtgatgcggcttgtattgccgcaagctccaaagtga	MLSRALGCLLSHAVEVTPSGGVLLGCRARGGHVVIEVWDSRPGIPQAQRADLFTPGTAYGQNLTDRGLGLVLAHRLSSAMAGQLSVYCSAAGGCVMRLVLPQAPK
NODE_12540_length_7240_cov_6.47599_ID_25851	fig|857335.5.peg.392	NODE_12540_length_7240_cov_6.47599_ID_25851_654_932	654	932	+	HigB toxin protein	FIG00044564	atgatcactgacttccgatgtgcagacaccaaagcactgttcgatggcaagcgcatcgcgcgtttcgccaatatcgaaaaggtcgccatgcgcaagctggttcagctgcatgcggctacagcactgagttttctggccgttccgccgggtaaccgcctagagccgctgtcaggcaaccgggccgggcagtacagcatccgcatcaacgagcagtggcgtgtgtgctttgtatgggctgacggcaatgccagccaggttgaaatcgtcgattaccactaa	MITDFRCADTKALFDGKRIARFANIEKVAMRKLVQLHAATALSFLAVPPGNRLEPLSGNRAGQYSIRINEQWRVCFVWADGNASQVEIVDYH
NODE_12540_length_7240_cov_6.47599_ID_25851	fig|857335.5.peg.393	NODE_12540_length_7240_cov_6.47599_ID_25851_943_1239	943	1239	+	HigA protein (antitoxin to HigB)	FIG00010902	atgacccgacaagttgcatggcctcatccgggcgaaatcctcctggaggaatggctcacccccttgagcatcacccagtacgccctggccaaggcaatcgacgttccccctcgccgcatcaacgagatcgtcaagggcgagcgcgccctctcggctgataccgcactgcgcctggcccgcttcttcggcacggacgcgcaaagctggctgaacctgcaaaccgcttacgacctggtcgtgaccgaggggcaaatgggcgacaagctcagccatatcaagcaacgggcagcggcctga	MTRQVAWPHPGEILLEEWLTPLSITQYALAKAIDVPPRRINEIVKGERALSADTALRLARFFGTDAQSWLNLQTAYDLVVTEGQMGDKLSHIKQRAAA
NODE_12540_length_7240_cov_6.47599_ID_25851	fig|857335.5.peg.394	NODE_12540_length_7240_cov_6.47599_ID_25851_2271_1285	2271	1285	-	Phage Rha protein		atggcaacaatcgttcaaggcgcgcccgcgcccgtcctgtctttccattccaccacctttcacccggttgttcgtgaaggccagctctggctgactgcggcagagatagcccaggcactgggctatgccagaggtacgttcgtcaatcgtctgtatgaccgcaacgccgacgaattcacggatgcgatgcaaggggtcgtcaatttgacgactaatggtggcgagcagaaaacgcgcgttttctctttgcgcggtgcgcacctcgtggccatgttcgcccgcacgccacgcgcagcggagtttcgccgctggctgttggatgtcctggatcgggaagtggcctcgatgccggtggtggtcacgccggtggagcctgaaaaactcggcccgccgatgggc…	MATIVQGAPAPVLSFHSTTFHPVVREGQLWLTAAEIAQALGYARGTFVNRLYDRNADEFTDAMQGVVNLTTNGGEQKTRVFSLRGAHLVAMFARTPRAAEFRRWLLDVLDREVASMPVVVTPVEPEKLGPPMGDRTLRLCHHLIDRLEPLFREDIAAVHGAVMQGVLTRFGCDAVADIPASQEPRLRKYLQSAFETFSYFVCAQRELLLNYLRHIDGQMDFEWSVDCNTRRRMERAMDVVEVEDVFADFGKHAPRLPSPAKAPPAGRTRYLTTVDPDEGGSVVMKPVPDGAFVRTPEQIVDLIEARDGFPHELLVPVIQAATRRLSQR
NODE_12540_length_7240_cov_6.47599_ID_25851	fig|857335.5.peg.395	NODE_12540_length_7240_cov_6.47599_ID_25851_2224_3222	2224	3222	+	hypothetical protein		atggaaagacaggacgggcgcgggcgcgccttgaacgattgttgccatgatagtgaacctccgcttgcggtttttaaccgcctacccttccgccaagaagggtgggcgaccggaacgggagttggcggaccggcagcggctaccggcgagccttgcggctcctcccgcccggccgcccatagaggcacgccaagcgacaaaaaagccgcactgcgaatgcatttgcggcttatcgccgccactgatcaggccgccaagcccggtcgctgctgtttcagcgacacggtgatggtagcccagcgtctgccggcgaatcaaggcggagtaatatttccctttttcatcaatgggatgctcatggatgcaaagatgcttgaggcgttgcaggcggcgacggag…	MERQDGRGRALNDCCHDSEPPLAVFNRLPFRQEGWATGTGVGGPAAATGEPCGSSRPAAHRGTPSDKKAALRMHLRLIAATDQAAKPGRCCFSDTVMVAQRLPANQGGVIFPFFINGMLMDAKMLEALQAATESGEMVLVCYNGGSRPGEAREMLLLQIDEQYVGARVMGEKRKRYRLDRIGWVEFQDGRRFVNADAAPAGHGSAPKATPPLNDATEAQRQRLEDAISKGQTLYIEMDDALDEEMKEVQWRGFIAPVGFVNHARGLRVICDLEPEGEYMVISECQGEGRRHLLIGSFTILSEFTRKVRRNEGGGLIISLEDVLLEIGKKADC
NODE_12540_length_7240_cov_6.47599_ID_25851	fig|857335.5.peg.396	NODE_12540_length_7240_cov_6.47599_ID_25851_3698_3240	3698	3240	-	hypothetical protein		atggcagacctgacaaaacccaacggcctggccgaagacctcggcgccatcctcggctttgaagccaccagccggctgctagccgtctatggcggcggcaccctctacatccccaacgaagccagcgaaaagcaccccatcgccgccgtgatcggccttccggccatgcggcacctgtgcgaggaattcggcgggcagatcctgagagtcccggagcatgacgaattccggcgcctgcgcctcgtccgcagcgtggctcgcctcctgtccctgggcctgtcgtattcggcggtggcggattcgctcggcgtcgcccccaggcaggtgcagcgataccgccagcaagccgaagagatcggcctactgccctacgtcatgcagggcagggcgggcgcaggc…	MADLTKPNGLAEDLGAILGFEATSRLLAVYGGGTLYIPNEASEKHPIAAVIGLPAMRHLCEEFGGQILRVPEHDEFRRLRLVRSVARLLSLGLSYSAVADSLGVAPRQVQRYRQQAEEIGLLPYVMQGRAGAGGGQSDLFAAGEGGQSGEKP
NODE_12540_length_7240_cov_6.47599_ID_25851	fig|857335.5.peg.397	NODE_12540_length_7240_cov_6.47599_ID_25851_5691_3703	5691	3703	-	Phage terminase, large subunit	FIG00017949	atgcgctctatctccgcgccgttcgccagcgcccacaagaagctcttcggtcgcctcgcgcgcagcatcgccccgcgccgccctacacttgtcagcgaatgggccgagcagcacctgcgcctctccagcaaagccagcgccatcccgggtgaattccgtctcgcgcgcaacccgctgctgcgcgaaatcatggatacccaatccgtgcgctcacgggtggaggaagtcgtcgcccgcctgcccattcagttcggcaagtccaccatcgagcaggccgtgatcggctacgccatgtgcgaggatcccggcccgatcatggtctgcctgcccggcgaggtcagcctggataaattcgtcaatcagaagctcaacccgctgatcgaagaaaccgacgccgtg…	MRSISAPFASAHKKLFGRLARSIAPRRPTLVSEWAEQHLRLSSKASAIPGEFRLARNPLLREIMDTQSVRSRVEEVVARLPIQFGKSTIEQAVIGYAMCEDPGPIMVCLPGEVSLDKFVNQKLNPLIEETDAVREVLGSLSSRDAANTKYFKEFHGGQLYMEHAGNPKRLKSTSVKRLLLDEWSSFASSLTSGDDPGELVRGRTSAFPHLAKTIKVGTPEIAGACRITADFDESDQRWPHVPCPHCGNYQPLQWKGLHWDLHPITGRVARAYYVCGGEDGCGAIIEEHHKTDMIARHRWVPHNPGGIRRGYHANCLYYSRGLGPDWATLAQMWLDAQGDLAKLKTFINDRLAEPWEDPTLRNVKHNILQDRAEAYPLRVAPMPICFVTAGVDTQDSRLE…
NODE_12540_length_7240_cov_6.47599_ID_25851	fig|857335.5.peg.398	NODE_12540_length_7240_cov_6.47599_ID_25851_5897_5691	5897	5691	-	hypothetical protein		gtggaagtcgcccaggtagaggccgcgctggcggatgccgtcatcacgctgcgcgcctccctcgaaggcatgggcgccatcctcgcgccgcagctcgccgcggagagcgatccgcacgaagtccgcctgctcgtcgatgaccacgtgcatcaggcgctgaccagcgtgtcggccaggttcgccaagatggcgcagggggtggcctga	MEVAQVEAALADAVITLRASLEGMGAILAPQLAAESDPHEVRLLVDDHVHQALTSVSARFAKMAQGVA
NODE_12540_length_7240_cov_6.47599_ID_25851	fig|857335.5.peg.399	NODE_12540_length_7240_cov_6.47599_ID_25851_6252_5929	6252	5929	-	hypothetical protein		atgagccagagcgagttcctcacccaggcagaatttgcccgccggcaggggtgggcgcgcagctacgtcaccgaactcaagcgcgccggccggctggtgatggatgccgacggcaagcgcgtcgatctgaccgcctcgctggcgctgatccggcagaccgccagcccggacaaggccgcagtggcggcccgccacgccgaagagcggggcgagtcccgcggagaatcgcgccccgacgatggcgagcaggacgccgaccccggcaagccggaataccaggccgcccgcgcccggcgcgaagaggcaaatgccggcctggcctga	MSQSEFLTQAEFARRQGWARSYVTELKRAGRLVMDADGKRVDLTASLALIRQTASPDKAAVAARHAEERGESRGESRPDDGEQDADPGKPEYQAARARREEANAGLA
NODE_12540_length_7240_cov_6.47599_ID_25851	fig|857335.5.peg.400	NODE_12540_length_7240_cov_6.47599_ID_25851_6509_6249	6509	6249	-	hypothetical protein		gtggatcatccgatcacccccgaagaatcccgccgcgcccgcgaaatctgggcacagatggaccaggacatgcgcgaattcgtcactgcactggtggatctggggttggtggaaggccggcgcggtctcgcccaggcgcgcatcgccatccatcctgatcggctcgatacgagcgacggcgtcaccccaaacatcccgacccgagaagagcgggaagccatcgaggccgcccgcgggcgcaacaaaggaggtagagcatga	MDHPITPEESRRAREIWAQMDQDMREFVTALVDLGLVEGRRGLAQARIAIHPDRLDTSDGVTPNIPTREEREAIEAARGRNKGGRA
NODE_12540_length_7240_cov_6.47599_ID_25851	fig|857335.5.peg.401	NODE_12540_length_7240_cov_6.47599_ID_25851_6708_6830	6708	6830	+	hypothetical protein		atgtgttccatacgtttcattgccctttccgcaagggttttcaatggcgctgtggtgttccatggtgtgttccatatgttccatcacgcggcgacctcttcccgggcattcatcgcaccctga	MCSIRFIALSARVFNGAVVFHGVFHMFHHAATSSRAFIAP
NODE_12540_length_7240_cov_6.47599_ID_25851	fig|857335.5.peg.402	NODE_12540_length_7240_cov_6.47599_ID_25851_7066_6791	7066	6791	-	hypothetical protein		gtgcgcaaccctcgcgaatcgaaccagttcctgggcaaggtcgcccgcatacctgggtgggccaatgacaacacctgggtctatgacagcctctacttcagcggccagccgcgcaagcagcgcatggtgattccggatcgcgccgaactcgaaaagtctggctactcgcccactgattcaaacaagcagcctgtcgccacaaaaagccagtggctcaccgtcgggtacttcaaatttcagggtgcgatgaatgcccgggaagaggtcgccgcgtga	MRNPRESNQFLGKVARIPGWANDNTWVYDSLYFSGQPRKQRMVIPDRAELEKSGYSPTDSNKQPVATKSQWLTVGYFKFQGAMNAREEVAA
NODE_1261_length_42786_cov_7.23685_ID_2897	fig|857335.5.peg.403	NODE_1261_length_42786_cov_7.23685_ID_2897_1190_294	1190	294	-	GTP-binding protein Era	FIG01304818	atgagtgaagaacaagcattccgcacgggcatggttgccatcgtcgggcggccgaacgtcggcaaatccacgctgctcaaccggctggtggggcagaaggtcagcatcgtctcgcgcaaggcgcagaccacgcgtcaccgcatcactggcgtgctgaccgagaatcgttgccagttcatctttgtcgacacgccaggcttccagacccgtcaccgcaatgcgctgaatgccaccatgaaccgcacggtggggcaggtgctgcaagaggtggatgtggtgatgttcctcatcggggccggacgttacggcccggatgaccagaaggtgctgaaactattgccaccagagggccgggtggtgctggtgatcaacaaggtcgacctcgaagaggacaaaagc…	MSEEQAFRTGMVAIVGRPNVGKSTLLNRLVGQKVSIVSRKAQTTRHRITGVLTENRCQFIFVDTPGFQTRHRNALNATMNRTVGQVLQEVDVVMFLIGAGRYGPDDQKVLKLLPPEGRVVLVINKVDLEEDKSRLLPCMEKMAAEFPFAEIVPVSAERGSNVPELLATLGRYLPEGEPLFDEDDITDRSERFLAAEFLREKLFRLLGEELPYGMTVEIEKFEVEGNLRRIFAAIIVDKAGHKGIVIGRGGVTLKRISSEARVELERLFDGKVYLETWVKVKSGWADDERALKSLGYDG
NODE_1261_length_42786_cov_7.23685_ID_2897	fig|857335.5.peg.404	NODE_1261_length_42786_cov_7.23685_ID_2897_1867_1187	1867	1187	-	Ribonuclease III (EC 3.1.26.3)	FIG00000208	gtgagtcaggctgtttccaggaccgaggctctagagcaagcactggcctatcgatttgcaacgccagcgctgctgcggcaggcgctcactcaccgcagctatgctgccgaccacaacgaacgcttggaatttctgggcgatagcctgctcaacatggtcatagcgatggcgttgttcgagcgcttcccgcaggccagggagggcgaactttcccgtctgcgcgctcgcttggtctgtcaggacagtctgcatggcgttgcgctggagttgagcctgggtgaatacctgctcctgggtgagggcgaagtacgtaacggtggtcagcagcgcccctcaatgctcgcagatgccgtggaggccattttcggcgccatctatcgtgacggtggtttcgaaccc…	MSQAVSRTEALEQALAYRFATPALLRQALTHRSYAADHNERLEFLGDSLLNMVIAMALFERFPQAREGELSRLRARLVCQDSLHGVALELSLGEYLLLGEGEVRNGGQQRPSMLADAVEAIFGAIYRDGGFEPARRTIERLLATALAAASLDSLKDPKTALQEELQGRRLPLPRYELCATHGAAHAQEFEVACVVEALSLRSTGRGSSRRIAEQQAAAAVLAEIKA
NODE_1261_length_42786_cov_7.23685_ID_2897	fig|857335.5.peg.405	NODE_1261_length_42786_cov_7.23685_ID_2897_2214_1864	2214	1864	-	hypothetical protein		atgcacagccaacgaggtctctcgctgatttccacactcattgtcggcgtcgtgctgatgagcctgctgatcctggccttcaagctggtgccggtgtattccgagtattttggcgtcaagaaggcttttgccggagttaccactgcactggatccctccctgccgccggcgaccttccgcaatgaattctggaagtacgcctacgccaacgacatcacttcggtggacaaggattcgattctcgtgaccaaggaaggcggccgagtgatcctggagaccagctatcggcgcgaggtgcccttgttcggcaatgccggattgtatttcgattttcacgtggtttccgagtga	MHSQRGLSLISTLIVGVVLMSLLILAFKLVPVYSEYFGVKKAFAGVTTALDPSLPPATFRNEFWKYAYANDITSVDKDSILVTKEGGRVILETSYRREVPLFGNAGLYFDFHVVSE
NODE_1261_length_42786_cov_7.23685_ID_2897	fig|857335.5.peg.406	NODE_1261_length_42786_cov_7.23685_ID_2897_3050_2232	3050	2232	-	Signal peptidase I (EC 3.4.21.89)	FIG00000015	gtggattttgccctgatcctgttcgtcctcagcgtgctcagcggtgtgctgtggttctacgatgtattcaaggcgcgcaagcgccgtaccaagggaacgccggacccctggtgggtggagtacggggcgagtttcttcccggtgatcctgcccatcttcatgctgcgttccttctggatcgagcctttccgcatcccgtcgggctcaatgtatccgaccctgcaggtcggcgatttcatcctggtgaacaagtacgcctacggcgtgcgcctgccggtgctgaacaagaaggtgattgaggtcggtcagccgcagcgtggtgacgtgatggtgttccgctatcctctcgacccgtcgcaggattacatcaagcgcgtgatcggcctgcccggagatcgc…	MDFALILFVLSVLSGVLWFYDVFKARKRRTKGTPDPWWVEYGASFFPVILPIFMLRSFWIEPFRIPSGSMYPTLQVGDFILVNKYAYGVRLPVLNKKVIEVGQPQRGDVMVFRYPLDPSQDYIKRVIGLPGDRVEYINKRLTINGQVVPVKQEADYLIPNTLDVFQRFEEQIGDKPHSVLNHRDAQAFIPEYQLLRHAYSGNCNYSGSGVSCTVPEGHYFVMGDNRDASADSRVWGFVPDQNIVGRAFFIWCHADSMIPPAGISFSRIGRFN
NODE_1261_length_42786_cov_7.23685_ID_2897	fig|857335.5.peg.407	NODE_1261_length_42786_cov_7.23685_ID_2897_4865_3072	4865	3072	-	Translation elongation factor LepA	FIG00000165	atgcagcacattcgcaatttctcgatcatcgcccacattgaccatggcaagtccacgctcgcggaccgtctcatccagatctgcggtgggctgtccgaccgtgagatggaagagcaggtgctcgactccatggatctggagcgcgagcgcggcatcaccatcaaggcacagactgcggcattgagttaccgggccagggatgggcaggtctacaacctgaacctgattgacacaccggggcacgtcgacttttcctatgaggtcagtcgctccttgtccgcttgcgaaggcgcgctgctggtggtggatgccacccagggcgtggaggcgcagacggtggccaactgctatacggcgatcgagctgggtgtggaagtgctgcccgtactcaacaagatg…	MQHIRNFSIIAHIDHGKSTLADRLIQICGGLSDREMEEQVLDSMDLERERGITIKAQTAALSYRARDGQVYNLNLIDTPGHVDFSYEVSRSLSACEGALLVVDATQGVEAQTVANCYTAIELGVEVLPVLNKMDLPSADPDGARQEVEDVIGIDATEAIPCSAKTGMGVEDILEMIVAKVPAPRGNPTGPLKALIIDSWFDNYVGVVMLVRVVDGEMRPKDKLLFMSTGAQHLCEQVGVFSPKSVQRDALRAGEVGFVIAGIKELGSAKVGDTITLASSPATQPLEGFKEIKPQVFAGLYPVESSEYDQLRDSLEKLKLNDASLQYEPEVSQALGFGFRCGFLGLLHMEIVQERLEREFDMDLITTAPTVVYEVVLNDGSVIKVENPAKLPEVSKYQEI…
NODE_1261_length_42786_cov_7.23685_ID_2897	fig|857335.5.peg.408	NODE_1261_length_42786_cov_7.23685_ID_2897_6381_4969	6381	4969	-	HtrA protease/chaperone protein	FIG00003002	atgctgcgcgtcctgttgctgtgttgctgcctgctgggcggcacgatgtccgcgtctgcgcggaatcttcctgaattcgcgacgctggcggcagcacaggctggcgtggttgtcaacatcagtgccgtgcgtgctccggcgcagacttcagcgcctttcctacaacccgaggccaaacccgatctgccttcctggttacgcaagctgttgccttccagaccggataccgatgatggcgagggtgtcgaagacgatggtcgctccgtaggatcgggcttcgtgattgcaccggatggttacatcttgaccaatgcacatgttgtggaggatgcgaccgagatcctggtgcgtctggcggacaaacgcgaatatctggcccggctggtgggcgcggatacg…	MLRVLLLCCCLLGGTMSASARNLPEFATLAAAQAGVVVNISAVRAPAQTSAPFLQPEAKPDLPSWLRKLLPSRPDTDDGEGVEDDGRSVGSGFVIAPDGYILTNAHVVEDATEILVRLADKREYLARLVGADTRSDVALLKVDAERLPVARLGDPARLRVGDWVLAIGSPFGFESSVTAGIVSAKGRALPDESLVPFIQTDVAINPGNSGGPLFNLAGEVVGINSQIYSRTGGFMGMSFSIPIDVAMDVQAQLRESGKVNRGRIGVLIQEVTQDLAESFALPAARGALVSEVEAGGPAARAGILVGDVLLAFNGRRIESSVELPRVVSATRPGTRSHLEYWRDGRMQSAVLEVTSFPDEQKAVVQRSDKLPPGANRLGLLLAEPTREQRQTLELPAGGV…
NODE_1261_length_42786_cov_7.23685_ID_2897	fig|857335.5.peg.409	NODE_1261_length_42786_cov_7.23685_ID_2897_6791_6381	6791	6381	-	Positive regulator of sigma(E), RseC/MucC		gtgcgggtggaaggggttgtcgtcagggtcgaggccgcgcaggccgtggtacaggtccgtcgccagggtggctgcgggcgctgcactgaaccgggtggttgcggtggcggtagcgaaggcggctgcagtgaatattggctggataacccggctcgtgcccgcgcaggccagcgggtgctcgtcgatctgccggaagggcaggcagcacgtgcggctctgttggcgtacgcgacccctttgctggtgctgctgctggcggccggcggagccactttgtccggctggccggatcctgtcgtggccatggttgcgctggccggtctggtactgagtctgctaggcttgcgattggcccgtcatatggggtggctgcgtctggcgcgcccctgtatcgcacaa…	MRVEGVVVRVEAAQAVVQVRRQGGCGRCTEPGGCGGGSEGGCSEYWLDNPARARAGQRVLVDLPEGQAARAALLAYATPLLVLLLAAGGATLSGWPDPVVAMVALAGLVLSLLGLRLARHMGWLRLARPCIAQVIS
NODE_1261_length_42786_cov_7.23685_ID_2897	fig|857335.5.peg.410	NODE_1261_length_42786_cov_7.23685_ID_2897_7772_6804	7772	6804	-	Sigma factor RpoE negative regulatory protein RseB precursor	FIG00001202	atgaagtttttgtgtgcaggtatgctgagcctgctggccggcctgtcctcaacacaggcgctggcaggatatgaagtcgagcagtggttgcagaagatgaaccaagcttcgcgcagcctgaacttcgaaggcgtgttcgtctatcagagccaggggcggtcagaaacttcccgcattgcgcggttggtcgatgcttccggcgaacgcgagcgtctggagactctggatggtgcgccacgcgaggtcgtgcgccacaatgaggacgtccactgctatctgcccgaagacaaggtactggtgttggaccgagttcccttcgggcgccagcctggtcgcctgagtatcaacccgagtcagttgcgcgagcattatcagatccgtgaactgggggcagggcgc…	MKFLCAGMLSLLAGLSSTQALAGYEVEQWLQKMNQASRSLNFEGVFVYQSQGRSETSRIARLVDASGERERLETLDGAPREVVRHNEDVHCYLPEDKVLVLDRVPFGRQPGRLSINPSQLREHYQIRELGAGRVAGRKAKVLELEPRDELRYGHTLWIDIASGLLLKARMQGPHSSMVEQFTFTEIRPGGNIDADLLRTRTTQSADWRVVDARGEELRPEDVPWTFKALPAGFREVSLVKRVVRRDGVQAVHAVFSDGLVNLSVFVERAMGNSPLVLQDSTLHAGSTSIYRRASGDYVITVMGEVPEAALRLVAYGVERRKP
NODE_1261_length_42786_cov_7.23685_ID_2897	fig|857335.5.peg.411	NODE_1261_length_42786_cov_7.23685_ID_2897_8299_7772	8299	7772	-	anti sigma-E protein, RseA		atgaaagagcagatatctggctggatcgatggcgaactggctccacaagaggcagaacgtttggtggcaagtgttccacgggatgctgcgcagcgggcttgctgcagcacctactggctgatcggcgatgcattgcgcgaagaggctcagccttgcctcggcgaagacttcactgcgcgggtcatggttgggctggagcaggagcctacggtacttgcgcccgtcgctgcgaagccgcgattccggcatccgccctggtatgcgatggctgcagcagtttccggggtcgtgatggcagtctggatggggctgagtctttggcctgccgcgtcggtcgacgctggcatggctacggttgcggtacagcctgtcactgcgcccggtgttgctgagatcgtt…	MKEQISGWIDGELAPQEAERLVASVPRDAAQRACCSTYWLIGDALREEAQPCLGEDFTARVMVGLEQEPTVLAPVAAKPRFRHPPWYAMAAAVSGVVMAVWMGLSLWPAASVDAGMATVAVQPVTAPGVAEIVPVSDQDIDDRAYLMAHRASVMGSPVGVAASIRTVSDERMGTR
NODE_1261_length_42786_cov_7.23685_ID_2897	fig|857335.5.peg.412	NODE_1261_length_42786_cov_7.23685_ID_2897_8900_8301	8900	8301	-	RNA polymerase sigma factor RpoE	FIG00000973	atgagtgacagagagattgatcagcaactggtcgagcgagtgcagcgcggcgacaagcaggcctttggcctgcttgtgagcaagtatcagcgcaagctgggacggttgctgtcacggatgattcgtgatccggcagaggtcgaggatgtgacccaggaagccttcatcaaggcctaccgggcgctgtcctctttcaggggtgaaagtgccttctacacctggctctaccggatcgggatcaacaccgcgaagaactacattgtttccaaggggcgccgtgcgcccacgagtacggagatcgagctggatgatgctgaacagtatgccgagggcgacctgctgcgagatgcagatacccccgagcgcctgctgcacaccaagcagatcggccagaccgtg…	MSDREIDQQLVERVQRGDKQAFGLLVSKYQRKLGRLLSRMIRDPAEVEDVTQEAFIKAYRALSSFRGESAFYTWLYRIGINTAKNYIVSKGRRAPTSTEIELDDAEQYAEGDLLRDADTPERLLHTKQIGQTVELALADLPDDLRTAITLREIEGLSYEEIATVMDCPIGTVRSRIFRAREAISERLRPLLDVAPDKRW
NODE_1261_length_42786_cov_7.23685_ID_2897	fig|857335.5.peg.413	NODE_1261_length_42786_cov_7.23685_ID_2897_9214_10578	9214	10578	+	L-aspartate oxidase (EC 1.4.3.16)	FIG00000575	atggcgccagttcgcatgctcagggtggggatcgcggcagtgatcgatcccagcgactcaacctcctcgcactacgaagacacccagatcgccggcgctcatctgtgcgatccggcagccacccgtttcgtggtcgacaacggctcacaagccattgcctggctgcgggaacagggcgtgcccttcacgccggaccctgagacttcctggggcatgcatctgacacgcgagggtggccacagccatcgacgcatcgtgcatgtggccgacgccacgggggctgcggtacaggaaacgctgactgaacgcgtcaagcgccatccgaatatccacatcctggaagaccatgtggccatcgacctcatcgtcggccataagctgggcacaccggaagccggc…	MAPVRMLRVGIAAVIDPSDSTSSHYEDTQIAGAHLCDPAATRFVVDNGSQAIAWLREQGVPFTPDPETSWGMHLTREGGHSHRRIVHVADATGAAVQETLTERVKRHPNIHILEDHVAIDLIVGHKLGTPEAGCLGAYLLDCNTNHVRAVGAAHTVLATGGAGKVYLYTTNPDTSTGDGIAMAWRAGCRISNMEFIQFHPTCLYHPQAKSFLISEAVRGEGGVLRLPDGTRFMPRHDPRGELAPRDIVARAIDFEMKKRGIDSVFLDISHKSPEFLHEHFPNITARCLELGIDITREPIPVVPAAHYTCGGVQIDLRARTDLPGLYAIGETTCSGLHGANRLASNSLLECVVFSQAAARDIRANKRPIPEDLPAWDESRVSDADEEVVIAHNWDELRRF…
NODE_1261_length_42786_cov_7.23685_ID_2897	fig|857335.5.peg.414	NODE_1261_length_42786_cov_7.23685_ID_2897_10977_10543	10977	10543	-	hypothetical protein		atgtcggcgcctttgttgcatctgtcactgcccctgaagcgttcccgtttgttgctgatcactttgtccgtgatgcatgggttgccattgctggcgatactgccatcgcaagtggctgtgccgatcaaactgccggtattgctgggcatcgtcctgtcggtgctgtggcaatggcgggaatggaaacgcctgcgcggagaatgcctgcagcaagggccggagtcatggctgctggagacagcgcaaggcaggtttgaagtcgatctgcaggcgggctgcttcgaatccagtcacctggtcgtgttgagctggcgcgagcgcgccagcggccggcgcggcaaggtcgccctgatgcgtgatgccttgtctgcggacgattggcgccgcctgcgacggacg…	MSAPLLHLSLPLKRSRLLLITLSVMHGLPLLAILPSQVAVPIKLPVLLGIVLSVLWQWREWKRLRGECLQQGPESWLLETAQGRFEVDLQAGCFESSHLVVLSWRERASGRRGKVALMRDALSADDWRRLRRTLRLLLSPAPQA
NODE_1261_length_42786_cov_7.23685_ID_2897	fig|857335.5.peg.415	NODE_1261_length_42786_cov_7.23685_ID_2897_12255_11038	12255	11038	-	3-oxoacyl-[acyl-carrier-protein] synthase, KASII (EC 2.3.1.179)	FIG00002246	gtgaccggcctcggcatcatttcgccggtcggtaataccgttgcttccgcttgggacagtatcgtcaatggtcgttccggcatcggaccggtgacccggttcgatgccagctcgctgaccacccgtatcgccggtgaggtgaaggatttcgatgttgcggcctatctttcttcgaaagaagcacgccgtttcgataccttcatccattatggccttgccgcagcgatcgatgccatcaaggatgccggcatcagtgagcatccggacaatgccgagcgtatcggtgtctgtatcgggtctggaatcggtggcctgccgctgatcgaagacaccatgcatgccatcgccgcaggcggtgcgcgcaagatttccccgttctttgtgccgggttcgatcatc…	MTGLGIISPVGNTVASAWDSIVNGRSGIGPVTRFDASSLTTRIAGEVKDFDVAAYLSSKEARRFDTFIHYGLAAAIDAIKDAGISEHPDNAERIGVCIGSGIGGLPLIEDTMHAIAAGGARKISPFFVPGSIINMVSGLLSINYGFKGPNFATVSACASGAHSVGEAQRLIEYGDADIMIAGGAESTVSLLGLGGFCSAKALSTRNDDPQGASRPWDKDRDGFVLGEGAGVLVLEEYEHAKARGAKIYAEVAGYGMSSDAYHITAPAEGGEGAARSMINALRNSRVAPDEVQYVNAHGTSTPLGDVGETLAAKRCFGAHASKLAMSSTKSMTGHLLGAAAGIEAVFSVLAIRDQIAPPTINLVDPSPECDLDYVPNEARKMAINVVVSNSFGFGGTNST…
NODE_1261_length_42786_cov_7.23685_ID_2897	fig|857335.5.peg.416	NODE_1261_length_42786_cov_7.23685_ID_2897_12554_12315	12554	12315	-	Acyl carrier protein	FIG00002328	atggagaacatcgaacagcgcgtccgcaagatcgttgctgagcaactgggtgcgaacgaagccgacatcaaaaacgagtcttcgttcgtcgacgatctgggtgctgattcgctcgataccgttgagctggtcatggcgctggaagaggaattcgagtgcgagattcctgacgaagaagccgagaagatcaccagtgtgcagcaggcgatcgactacgtctccgctcatctgaaggcctga	MENIEQRVRKIVAEQLGANEADIKNESSFVDDLGADSLDTVELVMALEEEFECEIPDEEAEKITSVQQAIDYVSAHLKA
NODE_1261_length_42786_cov_7.23685_ID_2897	fig|857335.5.peg.417	NODE_1261_length_42786_cov_7.23685_ID_2897_13407_12661	13407	12661	-	3-oxoacyl-[acyl-carrier protein] reductase (EC 1.1.1.100)	FIG00621114	ttgaaagcactggaaggccagtttgccctcgtcacgggtgcgacacgtggtatcggtcgtgccattgccctggacctggcgcaagccggcgcaacggtggttggcacggccacttctgcagaaggcgcggctacgatttccgcgtttctggaagaaggtggtttcaaagggcgtggcatcgccctgaatgtgaccgatgccgcagcctgcgaagcagcggtcagtgcctgtgaggctgagttcggtgccctggggatccttgtcaacaatgcaggcatcacacgcgacaacatcgccatgcgcatgaaggacgaggagtgggaggccgtgatcgataccaacctcaaggcggtattccgcatgtcgaggctggtgatgcgcggcatgatgaaagcccgc…	MKALEGQFALVTGATRGIGRAIALDLAQAGATVVGTATSAEGAATISAFLEEGGFKGRGIALNVTDAAACEAAVSACEAEFGALGILVNNAGITRDNIAMRMKDEEWEAVIDTNLKAVFRMSRLVMRGMMKARAGRIINITSVVGASGNAGQANYAAAKAGVAGMTRALARELGSRNITVNCVAPGFIDTDMTRDLPDAQRDMLQSQIALGRLGRPEEISAVVGFLASPAASYITGATIHVNGGMYMA
NODE_1261_length_42786_cov_7.23685_ID_2897	fig|857335.5.peg.418	NODE_1261_length_42786_cov_7.23685_ID_2897_14370_13420	14370	13420	-	Malonyl CoA-acyl carrier protein transacylase (EC 2.3.1.39)	FIG00000319	atgagcaatacattggaacaattcgctgtcgtctttcccggccagggctcccagtcggtcggcatgatgacctcctttggcgacgatgccgccgtgcgcgagacgtttgccgaggcttccgaggtactggggcaggatctgtggcaactggtggctgatggccctgtcgagttgctggggcagactatcaatacccagcctgtaatgctcacagcgggtatcgccgtctggcgtgcctggttggcccgtggcggtgtgcgtcctgccttggtggccggccattctctgggtgaatacgctgcgctggtggctgccggagccatcgaattcgcggaggccgtcaagctggtgcgttttcgtgctcaggtgatgcaggaagctgtgccggtgggtgagggc…	MSNTLEQFAVVFPGQGSQSVGMMTSFGDDAAVRETFAEASEVLGQDLWQLVADGPVELLGQTINTQPVMLTAGIAVWRAWLARGGVRPALVAGHSLGEYAALVAAGAIEFAEAVKLVRFRAQVMQEAVPVGEGGMAAILNLAPELVIEACAEAAQGQIVAPANMNSPVQIVIAGHAAAVERAMEACKARGAKRAVSLPVSAPFHSALMKPAAERLAERLAAVTITEPEIAVLNNVDVKTETSPAAIRDALVRQAYSPVRWIESVEAMGARGIRTVCEFGPGKVLAGLVKRINGELAVEAVTDAEALLRVREQISSV
NODE_1261_length_42786_cov_7.23685_ID_2897	fig|857335.5.peg.419	NODE_1261_length_42786_cov_7.23685_ID_2897_15347_14382	15347	14382	-	3-oxoacyl-[acyl-carrier-protein] synthase, KASIII (EC 2.3.1.180)	FIG00015100	atgattttttcccgtgtgatcggtactggcagcatcgttccgggcgcgcctgtcagtaatgacgatctcgttgcgcgtggtgtggaaacctccgatgcgtgggtttcagagcgtaccggaatccgcttccgccatctggccgacaagggtgtaagcaccagcgatttggcaaccgaagccgcacgccgtgcgctggaggccgctgggttgcggccggccgatatcgatctggtgatcgtggcgactacgacaccggacatggtgttccccagtacggcctgtctcgtgcagagcgcgctgggtgttcctgcgggtgcaccggcgtttgatgtgcaggcagtgtgcagcgggtttgtatatgcgctgacgatcgctgacaaatttctgcgttccggtagc…	MIFSRVIGTGSIVPGAPVSNDDLVARGVETSDAWVSERTGIRFRHLADKGVSTSDLATEAARRALEAAGLRPADIDLVIVATTTPDMVFPSTACLVQSALGVPAGAPAFDVQAVCSGFVYALTIADKFLRSGSHKRALIIGAETLSRILDWSDRSTCVLFGDGAGAVVLEAGDTPGILASALHADGTQHGILSVPSHPEGGSLVGCPFIRMDGQAVFKFAVRVLADVAREVLEQAALPLEQLDWLLPHQANVRILQGTAKRLGLSEENVIVTVDRHGNTSAASVPLALDVAVREGRILPGQTVLLEGVGGGFTWGAVLLRI
NODE_1261_length_42786_cov_7.23685_ID_2897	fig|857335.5.peg.420	NODE_1261_length_42786_cov_7.23685_ID_2897_16400_15360	16400	15360	-	Phosphate:acyl-ACP acyltransferase PlsX	FIG00000446	atgtccatcaccctcgcgattgactgcatgggcggcgatcacggcccgtccgtgacgatccccgccgcgttcgaattcctccgggaagacaaggatgtgcgggtggtgcttgttggccgccccgaagtattcgaccccgcctttaaggctcgtgccgcacaattcggcgagcgtctgcgcgtgaagcatgccagtgaggttgtcggtatggacgatgcacctgccatcgctatgcgcagcaagaaggattcttcgatgcgcgtggccattgacctggtcaaggctggcgaggccaatgccgcggtgtccgccggcaataccggcgccctgatggcgatttcgcgtttcgtgctcaagaccttgccgggcatcgacagacctgccatcgcgacgatcatc…	MSITLAIDCMGGDHGPSVTIPAAFEFLREDKDVRVVLVGRPEVFDPAFKARAAQFGERLRVKHASEVVGMDDAPAIAMRSKKDSSMRVAIDLVKAGEANAAVSAGNTGALMAISRFVLKTLPGIDRPAIATIIPSMRGQTYMLDLGANVDCTAEHLLQFAIMGSKLLEAVEHSDAPSVGLLNIGEEDIKGNEVVKQAAELLRNSGLNFYGNVEGNDIFKGTTDVVVCDGFVGNVALKSAEGVAHMVTTYLREEFRRGLLSKLIALLAMPVLRRFKKRFDPRRYNGASLLGLRGVVVKSHGSADVFGYVWAMRRAAEAARNNLIERISASVGGFTNAAAGAERLGAE
NODE_1261_length_42786_cov_7.23685_ID_2897	fig|857335.5.peg.421	NODE_1261_length_42786_cov_7.23685_ID_2897_16760_16581	16760	16581	-	LSU ribosomal protein L32p		atggccgttcaacagaacaagaagtcgccttccaagcgcggcatgcatcgtgcgcacgattttctgactgcccccgccctggcggtggagcccaccaccggcgaagcgcatctgcgccaccacatttcgccgaacggtttctaccgtggcaagaaggtcctgaaggtcaagggcgagtaa	MAVQQNKKSPSKRGMHRAHDFLTAPALAVEPTTGEAHLRHHISPNGFYRGKKVLKVKGE
NODE_1261_length_42786_cov_7.23685_ID_2897	fig|857335.5.peg.422	NODE_1261_length_42786_cov_7.23685_ID_2897_17332_16817	17332	16817	-	COG1399 protein, clustered with ribosomal protein L32p		atgtcgcaccagcaaccgttacggcagcgtttcattgccgacccttttgagtttgcccgtcgtggcgatgagctggctggtgagcttgatgcgcgcgagttgtcgcgtgtggcggagatgctgtggtcggtacaggcggcacagccggtgcggtatgtgctgagcggcactcatgtcgatggcaagggttatctatccatcgatatcgatgctgtactggtgatgcagtgtcagcgttgtctgggtgatgtcgaatgtcggccgcaggcccattcccgcctgatgctggtacggcgcggggaaccgctgcctgatgaggatctcgagcatgacgatttcgatccggtgcatgccggccgggatttcgacgtgctcgaagctgtggaagaagagttgctg…	MSHQQPLRQRFIADPFEFARRGDELAGELDARELSRVAEMLWSVQAAQPVRYVLSGTHVDGKGYLSIDIDAVLVMQCQRCLGDVECRPQAHSRLMLVRRGEPLPDEDLEHDDFDPVHAGRDFDVLEAVEEELLLALPLAPAHDACSLPGAGNDGAEGSPFAVLKGLKLKGA
NODE_1261_length_42786_cov_7.23685_ID_2897	fig|857335.5.peg.423	NODE_1261_length_42786_cov_7.23685_ID_2897_17381_17977	17381	17977	+	FIG146278: Maf/YceF/YhdE family protein	FIG00146278	atgccagccgccatacccacacaagtcctggtactcgcctcgacatcaatctatcgccgccagttgctggaacgccttggtctgcccttcatcacggaccgacccgaagtagacgaaacgcctcgggcgggggaaaccccggtcggcacggcggagcggcttgcccaggaaaaagcgcgtgctgttgctgcacgccaccccggcgcattgatcatcggtagcgaccaggtcgcccatcgcggcacgcagcgcttcgacaaacccggtacagccgaacgtgcaatcgcccaattgcgcaatatgagtggtcagagcatcgttttccacaccgctgtatgcttgctcgacgccgatagcggccagtccgaatgcatcggtgttcccacggaggcacgtttc…	MPAAIPTQVLVLASTSIYRRQLLERLGLPFITDRPEVDETPRAGETPVGTAERLAQEKARAVAARHPGALIIGSDQVAHRGTQRFDKPGTAERAIAQLRNMSGQSIVFHTAVCLLDADSGQSECIGVPTEARFRTLSEAEIVRYVEREAPLDCAGSAKSEGLGISLLEYMRGDDPTALIGLPLIALSRLLRSHGISVP
NODE_1261_length_42786_cov_7.23685_ID_2897	fig|857335.5.peg.424	NODE_1261_length_42786_cov_7.23685_ID_2897_17974_18684	17974	18684	+	Tetrapyrrole methylase family protein	FIG00931175	atgagtacaggctgtctgcacctgctgccggtcgggcttggcctggccgacccaacactcacacatccagcaggcgtgctgcaacgtttcgacgctttggattatttcattgccgaacgtgccaagaccgcgcgtgccgaactcaagcgcctgggctatagccgccctatccaggaggcagaaatccacgaactgccagaaaggccggacagcaaggggctcgccctgcttctggaaccgttgttccagggacgcaacggcggccttgtctcggaagcaggctgcccggccgtggcagaccccggcgccctggtcgtacgcgaagcccaccgactgggaatccgtgtgattccacacataggaccatcatcactgctgctggccctgatggcatcaggc…	MSTGCLHLLPVGLGLADPTLTHPAGVLQRFDALDYFIAERAKTARAELKRLGYSRPIQEAEIHELPERPDSKGLALLLEPLFQGRNGGLVSEAGCPAVADPGALVVREAHRLGIRVIPHIGPSSLLLALMASGLNGQSFAFHGYLPQKTDERLRAINQLERESAKLRRTQLFIETPYRNAAMFASLLDACSPQTLVCVARGLSTASEWIMTRSAADWKRQPAPDLERQPTVFLLLA
NODE_1261_length_42786_cov_7.23685_ID_2897	fig|857335.5.peg.425	NODE_1261_length_42786_cov_7.23685_ID_2897_19747_18800	19747	18800	-	Periplasmic serine proteases (ClpP class)	FIG00452687	atgagtgaggacaccagtcagccggggtgggaacgcaaggtcatcgagcaactggcgttcgaaagcctgcgtgaaacgaggcgtaagcgtcgctgggggttgttctttcgcttcctcgggtttggatatgtgggcgtgctgatctttctggtgtggaatgcgcagagcgggcagcgcatcgtcgatggagcggcgcataccgccgtgatttcgatcgagggggctatcggcccgcaatccgaagtcaaggcccaggacaccattgcagcgcttcaggccgcttttgaggcgccgggcgcgcagggtgtgatcctgcgcatcaatagtccgggcggtagtccggtacaggccggcatgatcaacgatgagatccgccgcctgcgcgggcagcatccggac…	MSEDTSQPGWERKVIEQLAFESLRETRRKRRWGLFFRFLGFGYVGVLIFLVWNAQSGQRIVDGAAHTAVISIEGAIGPQSEVKAQDTIAALQAAFEAPGAQGVILRINSPGGSPVQAGMINDEIRRLRGQHPDKPVYAVVEDVCASGAYYVAVAADKIFVDKASLVGSIGVRMDGFGFTGTMEKIGVERRSITAGENKNFLDPFSPQNPAHVTFARAMLAEIHQQFIDVVRKGRGERLKETPELYSGLVWSGERSVEMGLSDGLGSVASVARDLTKAEKLRDYTRRENIAERFAKRLGAEIGSSLRSSVEQLDWR
NODE_1261_length_42786_cov_7.23685_ID_2897	fig|857335.5.peg.426	NODE_1261_length_42786_cov_7.23685_ID_2897_20087_19740	20087	19740	-	Ferredoxin, 2Fe-2S	FIG00000664	atgcgccacctgatctgcaccgtggctgagctgactgatggaggagaggcccggcggttcgagctggatctggcgggcgagcgtgtgccggcattcgctcagcgttggcagggacaggtctatgcctatgtgaatcgttgcgctcacatacccatcgagctggattggaatccgggcaagctgctggatgattccggtcagtatctgatttgcgccactcatggtgcgctttacgcgcctgatagcggcgaatgtctggccggcccttgtgcaggtcagcgcctgcgggcgttggcagtgtgcgaggatggcggcaatgtctatctggagatcgaaagcaatgagtga	MRHLICTVAELTDGGEARRFELDLAGERVPAFAQRWQGQVYAYVNRCAHIPIELDWNPGKLLDDSGQYLICATHGALYAPDSGECLAGPCAGQRLRALAVCEDGGNVYLEIESNE
NODE_1261_length_42786_cov_7.23685_ID_2897	fig|857335.5.peg.427	NODE_1261_length_42786_cov_7.23685_ID_2897_20734_20075	20734	20075	-	Similar to phosphoglycolate phosphatase, clustered with ribosomal large subunit pseudouridine synthase C	FIG00133087	atggctgaaaagaagtttgatctgattgtcttcgattgggatggcaccctgatggattccacggctttgatcgtggattcgatccgcgcagcctgtatggatatgggggtggctgtgccctcgcgtgcgcaggcagcccatgtgatcggactgagtctggttggtgcgatgcgcgaagtggctcctggcctggatgaggccgaggtgcaggaactggcccgccgctaccgtgcgcattacttggcccgggacaatgaaaccgtgcttttcgaaggtacccgggagctgcttgagctgttgtgcgccgagggctacaccctggcgatcgcgaccggcaaggcgcgtgcggggctggatcgggtgcttgccagcagtgggttggcgccattgttccaggcc…	MAEKKFDLIVFDWDGTLMDSTALIVDSIRAACMDMGVAVPSRAQAAHVIGLSLVGAMREVAPGLDEAEVQELARRYRAHYLARDNETVLFEGTRELLELLCAEGYTLAIATGKARAGLDRVLASSGLAPLFQATRCADESFSKPHPGMLLDLMDRLVVDPERTLMVGDTTHDLLMARSAGVSAVAVTCGAHPEGVLRAESPAAVLPSVASLGDWLACAT
NODE_1261_length_42786_cov_7.23685_ID_2897	fig|857335.5.peg.428	NODE_1261_length_42786_cov_7.23685_ID_2897_22100_20727	22100	20727	-	Ribosomal large subunit pseudouridine synthase C (EC 4.2.1.70)	FIG00696679	ttgtatcgcgactccaaggccatatccagcctggagcccttcaattctgtttcgcgttcgcgcgcaaaatgggtcgatcaatcaattggtttgggctaccatcggccgtttttcccggccgacttgttttcgcgtggcagtgtcactccggcacaacgtgtgcacgcagccttgccgttcagtgcgcggaacctcgtctttccgggccggatcactctacggccttgtgcgctgcggaaggggcacgcggggcacttcggcccggggtgcctgttcggttccggagggaatgcaacaggaaagcaggtattccgccaggcagggccggccgatgctgctggccggggcgtaggagcccgcaagaaccaatgcagtatatgggatgcaatgactttaggc…	MYRDSKAISSLEPFNSVSRSRAKWVDQSIGLGYHRPFFPADLFSRGSVTPAQRVHAALPFSARNLVFPGRITLRPCALRKGHAGHFGPGCLFGSGGNATGKQVFRQAGPADAAGRGVGARKNQCSIWDAMTLGKTLTDQAAGTPAVRRVRIDEAVAGQRIDNFLLTFCKGVPRSHIYRILRSGEVRVNGGRVTQTYRLKEGDEVRVPPVRVAEREAPVVPARAVRQVLDVVFEDEALLVIDKPAGLAVHGGSGVSFGVIELLREQRPEAHFLELAHRLDRETSGLLIICKKRSALRVVQDAMRHGQMEKRYLTMVRGRWMNPLEHLRQPLFKYLTPEGERRVMVSPEGKPSHSIARLVKRWERYSLLEVELKTGRTHQIRVHLQSRGFPLLGDDKYGDF…
NODE_1261_length_42786_cov_7.23685_ID_2897	fig|857335.5.peg.429	NODE_1261_length_42786_cov_7.23685_ID_2897_22234_25131	22234	25131	+	Ribonuclease E (EC 3.1.26.12)	FIG00000913	atgaagcgcatgcttttcaatgcaacgcaggccgaggaactccgcgttgcgatcgttgatggtcaaaaaatcattgacctcgacatcgaattggcatcaaaggaacagcgcaagagcaacatctataaaggtgtgatcacgcgcatcgagcccagcctcgaagccgcctttgtcaattacggtgcagagcgccacggattcctgcccttcaaggaaatttcccgtagctacttcaaggaaggtgtggacgcatcccgtgccaccatcaaggaagcgttgcgcgaaggccaggaaatcatcgtccaggttgaaaaggaagaacgtggcaacaagggcgcggccctcaccacctacgtttccctggctggccgctatctggtcctgatgcccaacaacccg…	MKRMLFNATQAEELRVAIVDGQKIIDLDIELASKEQRKSNIYKGVITRIEPSLEAAFVNYGAERHGFLPFKEISRSYFKEGVDASRATIKEALREGQEIIVQVEKEERGNKGAALTTYVSLAGRYLVLMPNNPRGGGVSRRVEGDERTELREVMDSLDVPAGMSLIARTAAIGRSAEELQWDMNYLLQLWTAIDDAATPDFDAESKKRQNPAPFLIYQESSLVIRAIRDYFQPDIGEILIDTDDIFEQATQFMAHVMPSAVNRVKRYHDDVPLFSRFQIEHQIESAYGRQVNLPSGGAVVIDHTEALVAIDVNSGRATKGSDIEETALRTNLEAADEVARQLRLRDLGGLIVIDFIDMENQRNQREVENRLRDALRYDRARVQTGKISRFGLLELSRQR…
NODE_1261_length_42786_cov_7.23685_ID_2897	fig|857335.5.peg.430	NODE_1261_length_42786_cov_7.23685_ID_2897_26552_25188	26552	25188	-	Tryptophan synthase beta chain like (EC 4.2.1.20)	FIG00011422	atgcccgatcgcaatcgctacctgctcgaagagtcccggatgccacgtcagtggtacaacatcgtggcggatctgccggcaccgccggctccaccgttgcatccgggaacgggccagcccatcgggccggatgatctggctccgctgttccccaaggcgatcatcgcgcaggaggtgagtaccgaacgctggatcgacatccccgagccggtatgtgaagtctttcgtatgtggcgtcccagcccgctgttccgtgcccgtcgcctggagaaattgctgggcacgccggccaagatctatttcaagtacgaaggcgtttcgcccgcaggcagtcacaagcccaactccgccgtgccacaggcctggtacaacgctcaggaaggcgtgaagaagctgagt…	MPDRNRYLLEESRMPRQWYNIVADLPAPPAPPLHPGTGQPIGPDDLAPLFPKAIIAQEVSTERWIDIPEPVCEVFRMWRPSPLFRARRLEKLLGTPAKIYFKYEGVSPAGSHKPNSAVPQAWYNAQEGVKKLSTETGAGQWGSSLAFAGGLFGLDVTVYQVRVSYDQKPYRRAMMETWGAKCLPSPSDTTEAGRAALAKNPDFMGSLGLAISEAVEVAAKNEDTKYALGSVLNHVLLHQTIVGQEAILQMEMTGDDPDVIVGCTGGGSNFAGIAFPFIGQQLRGEHGKRRFVAVEPAACPSLTRGKFAYDFGDTSHLTPLVNMHTLGSTFTPPGFHAGGLRYHGMAPMISHVAELGLIEAQAYHQKACFEAGVMFARTEGIVPAPEATHAIKGAIEEAL…
NODE_1261_length_42786_cov_7.23685_ID_2897	fig|857335.5.peg.431	NODE_1261_length_42786_cov_7.23685_ID_2897_27073_34569	27073	34569	+	Capsular polysaccharide biosynthesis fatty acid synthase WcbR	FIG00007379	ttgcaacaagaaaagtctgttccacgtcgtgtcgctatcatcggcagcgcctatcgattcccctccacttgtagcgcccggctatggcaagatctgctcgcaggcaaggatctcgtcacaaaagttgcatcagagcgctggagtaaacccagttttctgcaccccgacaaaacacaccctggtacggcctatacctttgcggctggttcgatcggcgatgtctcaggctttgatgcagagtttttcggtatttcgcctcgcgaagctgcccagatggatcctcagcaacgcctgttgctggaaatggcctgggaagcgctggaaagtgcaggcatccccccctcaagcctgcgtggtagccgctgcggcgtattcatcggtctggccagcgcggactac…	MQQEKSVPRRVAIIGSAYRFPSTCSARLWQDLLAGKDLVTKVASERWSKPSFLHPDKTHPGTAYTFAAGSIGDVSGFDAEFFGISPREAAQMDPQQRLLLEMAWEALESAGIPPSSLRGSRCGVFIGLASADYSYRYADDLAAIDASTATGNTASVAANRLSYFFDWHGPSMAIDTACSSSLVAFHQACRAIASGEVPYAITGGISLHLHPYGFIIFSKASMLSPNGRCNTFDADGDGYVRSEGGGLFLLKDYEQAIADGDHILAVVAHSAVNTDGRKSGLTVPNPDAQAALLRSAYTEAGIHPAEIDYLEAHGTGTAVGDPLETSALGVALGSQRPKDSPLPIGSVKSNLGHMETASGVAGLAKALHAIQYRMVPATIGIKTLNPKIRLDEWNLDVIT…
NODE_1261_length_42786_cov_7.23685_ID_2897	fig|857335.5.peg.432	NODE_1261_length_42786_cov_7.23685_ID_2897_34566_35912	34566	35912	+	8-amino-7-oxononanoate synthase (EC 2.3.1.47)	FIG00051001	atgaacaagcgcatcagcgggctaggggcacagctcaaggaaaagctcatccagcaaagcctggagcgacgcctgcgcagcgcagggcaaaccactcagcccccccaggcgccacgcgctggcgccaaggcccagcaggttcccgaacagttcaggcgcttcgaccagcatccgggctaccagcaactgcgcatcatcagcgagggcggcacgcgcctgggcatcgccaaccccttcttcaagctgcacgaaggccgcgccggcgcgcataccaccatcgccggcaaggatctgctgaacttcgccaactacaactacctgggcttctctggcgacccgcgcgtcaacgccgccgccgtggcggccatcgagcgctatggcacatcggtatcagcaagc…	MNKRISGLGAQLKEKLIQQSLERRLRSAGQTTQPPQAPRAGAKAQQVPEQFRRFDQHPGYQQLRIISEGGTRLGIANPFFKLHEGRAGAHTTIAGKDLLNFANYNYLGFSGDPRVNAAAVAAIERYGTSVSASRVVSGERPIHRELERSLAALYGTDDAVVMVSGHAANVTTIGHLFGPRDLIVHDELVHNSILQGIKLSGAKRLPFAHNDWAALDSLLERQRNDFERVLIVVKGIYSMDGDYPDLPRFVEIRNRHQCFLMVDEAHSLGVMGKRGYGIREHFGLQGSDVDIWMGTLSKTLAGCGGYIAGEHALIEHLKFLAPGFLYSVGMAPPLAAASLAALECLHAEPARVEKLQHNGQLLLESLQRKGIDTGHSTGLAVVPAIVGSSVKATRLSASL…
NODE_1261_length_42786_cov_7.23685_ID_2897	fig|857335.5.peg.433	NODE_1261_length_42786_cov_7.23685_ID_2897_36360_35920	36360	35920	-	Acetyltransferase (GNAT) family		ttgctgatcgtcagcgaatctggggagaccggcggtttcgtgaccttcaagcagcaggggcgtggtccgtacaccccggcgttgcgtactttccagaaagtgttcgggttgtggtcaggcctgtggcgttttctcgcgttttggctgctggaggcacgcgatctgggcaacgggttttacatatacggcctgaaggtgtctgtacatcatcgtcgtgagggcctggccagactgctggtcgccgccgtggagcaagaagcctggcgccgtggtgcatgccacgtgacgcttgaggtgggcgaggaaaacattcccgcccgtaccctctatgaaagccttggctacgctcgctatcgcacgatatccctgcgcgggctatcccgcttctttcctttttcc…	MLIVSESGETGGFVTFKQQGRGPYTPALRTFQKVFGLWSGLWRFLAFWLLEARDLGNGFYIYGLKVSVHHRREGLARLLVAAVEQEAWRRGACHVTLEVGEENIPARTLYESLGYARYRTISLRGLSRFFPFSRLHRLRKLRPSTL
NODE_1261_length_42786_cov_7.23685_ID_2897	fig|857335.5.peg.434	NODE_1261_length_42786_cov_7.23685_ID_2897_38012_36531	38012	36531	-	Capsular polysaccharide biosynthesis protein WcbQ	FIG00009623	gtgttgtggccgatgctgctggcgtttgtgctgactgcgttggcggaggcctgcctcatgcaacctcggccgttcctgcggcggcctgcctggacctgtgcactgcatgcgggttccgtcggggtattgttcgtgctcgggctgctggtatttcgccgaccttggtttgcagcctgtcagccgttggcctggcactttctgctgctcgcggtgaattgggtgaagcgggatgcgttgcgcgaaccctttgtgttccaggatttcgagtatttcgtcgatttgctgcgtcatccgcgtctgtatctgcctttcttcggctattgcaacgcgttgctgggcattgccgcggcggtgattttcatcaccactggcatgctgttggagcctgggctggatgcc…	MLWPMLLAFVLTALAEACLMQPRPFLRRPAWTCALHAGSVGVLFVLGLLVFRRPWFAACQPLAWHFLLLAVNWVKRDALREPFVFQDFEYFVDLLRHPRLYLPFFGYCNALLGIAAAVIFITTGMLLEPGLDAKLFRQGVLLSALLTVLALLVGWWHGRRIVASFDADADLRCFGLAANLWLYALAERRKPQLPSRFVGQLSLLAAENTPHLVVVQSESFFDARRVYEGVAPSVYAWLDAAKADAVLHGLLEVPAWGANTVRSEFAFLSGLRNEALGVHRFNPYRRLREVDTVAWALRRAGYRTVCVHPYSANFYQRDRQFPLFGFDEFVDIRAFSAEDRVGAYIGDIAVADRVAELLQAADAPLFVFVITMENHGPLHLETVGAGDEAMLYSGQPPSG…
NODE_1261_length_42786_cov_7.23685_ID_2897	fig|857335.5.peg.435	NODE_1261_length_42786_cov_7.23685_ID_2897_38706_38026	38706	38026	-	Oxidoreductase, short-chain dehydrogenase/reductase family (EC 1.1.1.-)	FIG01955289	gtgggagtgcatctggtattgcaggggcgggatgaagccaggctttccgacttgatggatcgttgcaaggcgcgcggtgcagaggtgtctttatggctggtggatctgtgtgaccttgttgcgatgaggcgatggctggcagaggcggatacgccggatctgctgatagccaatgccggacgcaatacgcatgtggggccgaacggcgagcccgagccttggagtaaggtcgaggctttgctggatgtgaacctgcgtgcggtgatggcgttggtgcatggcgtacttccggggatgcgtaaacggggtagcggccagattgcactggtgagttcgctcgcagggtatttcggcctgccgatgacgcctgcctattcggccagcaaggctgcggtcaag…	MGVHLVLQGRDEARLSDLMDRCKARGAEVSLWLVDLCDLVAMRRWLAEADTPDLLIANAGRNTHVGPNGEPEPWSKVEALLDVNLRAVMALVHGVLPGMRKRGSGQIALVSSLAGYFGLPMTPAYSASKAAVKAYGEALRGWLAPEGVRVSVIMPGYVASPMCHAMPGPKPFLWPPERAAQVILRGLARNRARIVFPRLLAWGCWWLAVLPPALSCRILRWLDYRA
NODE_1261_length_42786_cov_7.23685_ID_2897	fig|857335.5.peg.436	NODE_1261_length_42786_cov_7.23685_ID_2897_40147_38879	40147	38879	-	Capsular polysaccharide export system protein KpsS	FIG00008893	atggaaagacgtgtctttctgttcctgcagggtgtgtgttcgccattcttcgcgcgtttggccgatcgcctcgtggcggatgggcatcaggttctgaaggtgaatttcaacgtgggtgactggatgtattgggcgccccgtccggcggtgagtttccgtcagccgctctccatgctttccgctttcttgggcgacctgtatgcgcgctatggcgtgacggaccagatcctgttcggagattgccggccagtgcaccggccagcagtcgagaaggcgcgtggcctgggcatcaggacgcatgtcttcgaggaaggttatttccgtccgttctgggtaacactcgaacgggaaggcgttaatagctattcgcgattgccgcgtgatccagattggtaccgg…	MERRVFLFLQGVCSPFFARLADRLVADGHQVLKVNFNVGDWMYWAPRPAVSFRQPLSMLSAFLGDLYARYGVTDQILFGDCRPVHRPAVEKARGLGIRTHVFEEGYFRPFWVTLEREGVNSYSRLPRDPDWYRALGPTLPEYGRGKSFVLPFRVRAGHDVAYHLAGALNPLLFPNYRTHHPDNAALQYLGYMHRLPMLRLHAPRDTNRIYDLIQRGKPFYVLPLQMNGDAQIRDHSRFRDMEEVMWFVMDSFAPRAPGDAHLVIKNHPLDYGLVPHARTAAHLSRHFGLQGRVHYLETGNLRHLLQRAHGTVTVNSTVGSVALGHVCPTICLASPIYDLPGLTFQGELDDFWRERQEPDMKLFRYFRSAVIHTTQVNGGFYSRAGIEQLVENCLPRLLA…
NODE_1261_length_42786_cov_7.23685_ID_2897	fig|857335.5.peg.437	NODE_1261_length_42786_cov_7.23685_ID_2897_40905_40198	40905	40198	-	Capsular polysaccharide export system protein KpsC	FIG00143405	gtgcgggccttgatcgtcgagcaggggttgagcaagtacaacgtggcgagccggaatgctgcacggtggcctgcccaggggcggcgcgtggtgttggtgccgggccaggtggaggacgatgcctccatccgtttcggctgtgcgggtatccgcagtaatcgtgagctgctggaagccgcgcgcagtgcttgcccggaagcgttcatcgtctacaaaccacatccggatgtgctttctgggcgccgggcaggcgcggtttctgctaaggatcttgcacgctgggcggaccacgtggaaacggaactctccgtggtgagctgtatcgaggccagtgacgaagtacatacgctgacttcgttgacggggtttgatgccttgctgcgcggcaagcatgtcgtg…	MRALIVEQGLSKYNVASRNAARWPAQGRRVVLVPGQVEDDASIRFGCAGIRSNRELLEAARSACPEAFIVYKPHPDVLSGRRAGAVSAKDLARWADHVETELSVVSCIEASDEVHTLTSLTGFDALLRGKHVVTYGMPFYAGWGLTQDCGPEGPAHRRRLRRLHLDELVAGALLRYPLYWDSRFRGYASCRGIIHRMVSLREKLEQTGELERLRLGWIFRLGRRLRLLVDSWRML
NODE_1261_length_42786_cov_7.23685_ID_2897	fig|857335.5.peg.438	NODE_1261_length_42786_cov_7.23685_ID_2897_42320_40893	42320	40893	-	Capsular polysaccharide export system protein KpsC	FIG00143405	atgcatgccttgcttggcgtgctttctgagcttactgactggatatctgtggatcgcttcctggcttacggctggttcctgcaagggactacgtcgctggactcattgttcgatggcgctgaggtgctgcgtggccgggctgcccgcaggcgtgccgatctgacgggggttctggcttgggggcgcaagcccagtgcccggcgtgcggaggcgttcgcggcccggcgcgggttgcgtgtgatccgggctgaggatggcttcctgcgttcctacggcaccggggatcgcttcccaccgctggtcgtgaccatcgatgaggaagggatctattacgacagtacggctccgagtgtgctggaatccctgctcaactcttccaccgatgtgcttgccggaatc…	MHALLGVLSELTDWISVDRFLAYGWFLQGTTSLDSLFDGAEVLRGRAARRRADLTGVLAWGRKPSARRAEAFAARRGLRVIRAEDGFLRSYGTGDRFPPLVVTIDEEGIYYDSTAPSVLESLLNSSTDVLAGIQEDVIRAKALILGNRLSKYNHAPPFDPALLRPGDRQRVLVIDQTAGDLAIVCGGAGPESFARMLQAALDENPDATVYVKTHPEVTAGRKGGYLTDVRDGDRVVVLRGFVNPLSLIEHMDRVYAVTSTMGFEALLAGKQVSCFGMPWYAGWGATEDRLTCARRVRRRSVDEIFAAAYFHYSRYVNPDTDERGTIFDVIDWLIRQCAMEARQGGRSIWVGMQRWKFAYVLPMLSLHQGRAFLVQDAAAAARLMPTSADRLIVWGAEVQ…
NODE_12_length_136487_cov_12.6804_ID_29	fig|857335.5.rna.10	NODE_12_length_136487_cov_12.6804_ID_29_744_672	744	672	-	tRNA-His-GTG		gcggcattagctcagttggtagagcactggattgtgattccagtggtcaccggttcgaacccggtatgtcgcc
NODE_12_length_136487_cov_12.6804_ID_29	fig|857335.5.rna.11	NODE_12_length_136487_cov_12.6804_ID_29_890_817	890	817	-	tRNA-Arg-TCT		ctgcccgtagctcaactggatagagcaacggccttctaagccgtaggttaggggttcgattcccttcgggcagg
NODE_12_length_136487_cov_12.6804_ID_29	fig|857335.5.rna.12	NODE_12_length_136487_cov_12.6804_ID_29_1023_950	1023	950	-	tRNA-Pro-TGG		cggggcgtagcgcagcccggtagcgcgcttgctttgggagcaagatgtcggaggttcgaatcctctcgccccga
NODE_12_length_136487_cov_12.6804_ID_29	fig|857335.5.peg.439	NODE_12_length_136487_cov_12.6804_ID_29_1410_1084	1410	1084	-	hypothetical protein		atgtcgtacaagatcaccggattggaccagctggagcaattggcctccatcctcaaaggctttcgcaaggggcagcgtctgacgcagaaggccatggccgaacggctgggcatgacgcagcaagcctatgcgcagcttgaggccgacccctccgtagtgagtctggcccgcttgctgcgggtgttgcgtgcaatggaagccgagctggtgctggtggcgccttccggcgtcagcatggaacaacctgcgcaacggccgctgccgtctgccgcgcatgccccggtgctgaaccgcaggccgatgcccgaggcatgtgccgcggcctga	MSYKITGLDQLEQLASILKGFRKGQRLTQKAMAERLGMTQQAYAQLEADPSVVSLARLLRVLRAMEAELVLVAPSGVSMEQPAQRPLPSAAHAPVLNRRPMPEACAAA
NODE_12_length_136487_cov_12.6804_ID_29	fig|857335.5.peg.440	NODE_12_length_136487_cov_12.6804_ID_29_2086_1493	2086	1493	-	FIG000605: protein co-occurring with transport systems (COG1739)	FIG00000605	atgccctacagcattgccacgcccgtggattgcgaactcgtgatcaagaagagccgctttcttggctgcgtgcagcccgtggcggatcgggccacggcgcagaagatcgtggcggctctgtgggcccagcacccgggcgctgcgcacgtatgctgggctttgctcgctggcggagactccgctgccgtggacgatggcgaacccggtggcaccgcggggcggcccatgctggaggtgctgcggttgcaggaactggagggcgtgctggccaccgtggtgcgctactacggtggcgtgaagctgggagcgggcgggttggtgcgcgcctacaccgatgctgtcgcccagccgctgcgtaccgcgcagaaggtgccgctcatccgcttgtgcacgctgtgc…	MPYSIATPVDCELVIKKSRFLGCVQPVADRATAQKIVAALWAQHPGAAHVCWALLAGGDSAAVDDGEPGGTAGRPMLEVLRLQELEGVLATVVRYYGGVKLGAGGLVRAYTDAVAQPLRTAQKVPLIRLCTLCCEAPYSLEGMIRRGIDAAGATLAEVRHGQAVTFSITLPEVQAAPFMAQLSASGQGRIQWLETAE
NODE_12_length_136487_cov_12.6804_ID_29	fig|857335.5.peg.441	NODE_12_length_136487_cov_12.6804_ID_29_3025_2123	3025	2123	-	Regulatory protein, LysR:LysR, substrate-binding		atgcgtgaagtcagcctggatcgcctgcgcaccctggtggcggtggccgaactggggtccttcgcccgtgctgccgatctgctgcatctggctccgcccacggtgagcctgcacgtggccgaactggagacgcgtgttggcgcacgcctgttgtcccgcaagcgtggcgaggtgaggcccacacctgtgggtgaattcctcatcgagcgggcccggcgattgttgctggaggccgaacaggctctgctctccgcgcagcgtcaggctcaagggctggctgggcgcgtgcgcctgggggcatctaccggcgccgtggcgcatctgctgcccggggcgttgaagctgctccacgtgcggcatcccggcatcgaggtacaggtggagatcctgacgtcgcgg…	MREVSLDRLRTLVAVAELGSFARAADLLHLAPPTVSLHVAELETRVGARLLSRKRGEVRPTPVGEFLIERARRLLLEAEQALLSAQRQAQGLAGRVRLGASTGAVAHLLPGALKLLHVRHPGIEVQVEILTSRESIARLAAGTLEIGLVALPQAPVRQVCVEPWRRDPVMAFLPAGWDIPDTASPAWLATQPLILNDASTHLHRLCTEWFAAAGEFPQARIQLNFNDAIRSFVGAGFGATLLPQEGDSRWRIHTWLCGHCNRPCGVSLAWLIRQRMPKWLRATCWTSCARAPGKGDWRQA
NODE_12_length_136487_cov_12.6804_ID_29	fig|857335.5.peg.442	NODE_12_length_136487_cov_12.6804_ID_29_3024_4079	3024	4079	+	N-acetyl-gamma-glutamyl-phosphate reductase (EC 1.2.1.38)	FIG00000358	atgggttttcccgattcagaaaattcgaattatgcgctcatgaaattcaacttttcatcatcacaccaggatcgcaagatcagccctccacactacaacgcgaggatttccgcgatgaccagccccatcatcttcatcgatggcgaccagggcaccaccggcctgcagatacacgcccacctcgacggtcgcccggacctgcacctgctcacgctgccggagacccggcgcaaggatcccgccgcgcgtgccgaagcgctcaatgcctgcgatatcgccatcctctgcctgccggacgacgctgcccgcgaagcggtctccttcatcaccgcaccgcatgtccgggtgatcgatgccagcagcgcccatcgcacctgcacaggctgggtctatggcttt…	MGFPDSENSNYALMKFNFSSSHQDRKISPPHYNARISAMTSPIIFIDGDQGTTGLQIHAHLDGRPDLHLLTLPETRRKDPAARAEALNACDIAILCLPDDAAREAVSFITAPHVRVIDASSAHRTCTGWVYGFPEMATEQAARIAQATRVSNPGCYPTGAIGLLRPLREAGLLSADHPLSIHAVSGYSGGGRPAVEAFEGTSGGQPPGLRLYGLQLAHKHPPEIRHYCGLSRLPLFVPAYAAYRQGIVLSIPLHRDLLPAVSDAARLHDCLATHYANAGAVAHGRPPAVPSRSAGLQWQQPHATGGLRKCRCRPDPAHGRVRQPRQGSRQRSRAEPATDAGWRCFLGAGGP
NODE_12_length_136487_cov_12.6804_ID_29	fig|857335.5.peg.443	NODE_12_length_136487_cov_12.6804_ID_29_5128_4076	5128	4076	-	Dibenzothiophene desulfurization enzyme B		atgagcacaccgctctggttcactcgttgccccttgcccaccgctttttcgctggccgtgcactcgggcatcctggcccgccacctggccgccttcggcgtggcgccgcaatccctgcgccacgtcgcggacgcgtccttccggctcgcgcatttcacgcatgccctgcctgacatgacgcgccagggcggccacattccaccgctgtggtcgcgtgccgccgggcgcgatgtgcgcctgctcgggctgagctggacggatgagcgccagttgctgctggtggagcgcgacgacatccaggacgtggcggatctcaagggcaagcgcctggccttgccggtacgcccgaactatccgatcgatttctggcgcgccacggtgctcaagggctatcacgat…	MSTPLWFTRCPLPTAFSLAVHSGILARHLAAFGVAPQSLRHVADASFRLAHFTHALPDMTRQGGHIPPLWSRAAGRDVRLLGLSWTDERQLLLVERDDIQDVADLKGKRLALPVRPNYPIDFWRATVLKGYHDLLATVGLSLDDVTLVEIPIDAAAFAERASRPDLLSPPGAARQTLSSQTREGRALLAGSVDAIYSPAHYGIALQQVLGLRVLADLTRSHPPEARINNSSLLALTVSGEFLRDHSDAVTALLTALLEAAELARTTREMAIRITAAESGNAEELVPDIFGEHFHQVLAPSLAPALLQALAGQNEFLHRHGFIDRVVPLEEWLAPEPLATAQSRLAEVRAA
NODE_12_length_136487_cov_12.6804_ID_29	fig|857335.5.peg.444	NODE_12_length_136487_cov_12.6804_ID_29_5880_5140	5880	5140	-	Alkanesulfonates ABC transporter ATP-binding protein / Sulfonate ABC transporter, ATP-binding subunit SsuB	FIG00061912	atgatccaggtatccggtctgaggaaatccttcggtgacttcgcggctctggggccggtgagtttcagcagcggcgctgagcggatcctctcggtgatcggccccagcggctgcggtaaaagtaccttgctgcgtttgatcgctggcctggagcaggccagtgccggcagcatcacgctggacgggcaggccatcaccgggccggacccgagggtcagtgtcgccttccaggagccgcgcctgatgccctggctggatgtggcacagaacatcgcgctggccgtgtgggactggccggccgagcggcgtgagcaggcggtgcaggcaacgctcgccaaggttggtctgagtcaattcgcgcatgccttgcccaagcagctctccggcggcatggcacag…	MIQVSGLRKSFGDFAALGPVSFSSGAERILSVIGPSGCGKSTLLRLIAGLEQASAGSITLDGQAITGPDPRVSVAFQEPRLMPWLDVAQNIALAVWDWPAERREQAVQATLAKVGLSQFAHALPKQLSGGMAQRVGLARALVGEPALLLLDEPFGALDPLTRIRMQEHLLEIVGDEGPAILLITHDIEEALVLSDRILVFRGPPASLQRDLAVDLPRPRDRSSTRFAALKALLLEDLLPSSRRQAA
NODE_12_length_136487_cov_12.6804_ID_29	fig|857335.5.peg.445	NODE_12_length_136487_cov_12.6804_ID_29_6641_5886	6641	5886	-	Alkanesulfonates transport system permease protein	FIG00138354	atgtccgaactgttgctcagatggtttcgcccggaaggtagcgtgggccgcgcggcaggcgccggagccggtatcggctggcgcgctgcgctgccctgggtagtacccgcgctgatcctgctggtgtggcagttcatcagccggcaggcgctggtcgaccccaccttgctgcccgcaccgacgcaggtactgggtgagctggcggacatggccgcatccggaaaactggccgacaaccttggcgtttccgcgcagcgcgcattgctggaccccatcctgcaagcgctacgcacgatcccggggctggcctgggtgccgctgttcattctctggctgggtatcgacgaaggttcgaaggtcgcattgatcgccaaggcggcgttctttccgacctatctg…	MSELLLRWFRPEGSVGRAAGAGAGIGWRAALPWVVPALILLVWQFISRQALVDPTLLPAPTQVLGELADMAASGKLADNLGVSAQRALLDPILQALRTIPGLAWVPLFILWLGIDEGSKVALIAKAAFFPTYLNFMSGIVRADRKLIEVGQVYRLKGRLLVQRVLLPQALPFLFVGLRQSMGVAWLVVVAAELLGASSGVGYVLLDGEMTGRPHVVMACMIIFALAGKSTDWLIARIANRTLRWQDTLPQE
NODE_12_length_136487_cov_12.6804_ID_29	fig|857335.5.peg.446	NODE_12_length_136487_cov_12.6804_ID_29_7623_6655	7623	6655	-	Alkanesulfonates-binding protein		atgaagaattttcgcagtttcgttttcgccgctcttgccctcggtggtctgagccttgccgcgcagggcgccgagccactcaaggaagtacgcgtcggtttcaccaagatcgttcccgagacgttggtcgccaaggagaagggctggatcgaggaagcgctggcgccgcagggtatcagcgtgaaatgggtggagtcgctgggtagcaacaagaccatcgaattcctgcgcggcaagagcctggatatcggcccttctagcgctgcttcggcattcctggcacgcgccaacggcacgccgatcaagtacgtctactggacttcgcgcaacgataccggctcgcccatcctggtccgcaaggatgccacctatcgcagcgtcaccgatctgaagggcaag…	MKNFRSFVFAALALGGLSLAAQGAEPLKEVRVGFTKIVPETLVAKEKGWIEEALAPQGISVKWVESLGSNKTIEFLRGKSLDIGPSSAASAFLARANGTPIKYVYWTSRNDTGSPILVRKDATYRSVTDLKGKKIAATPGTGPYISLIAALDKHGLSEKDVEIVSLQHPQGRLVLVTGKVEAWAGLDPDWAIAEVQSGARVLFADPDLAGGGGIDVREEFLANYPDVVKAVLAGFDRARRFSLQNEADSVKVFAEQSKIELAAAQRAFERSRLEHPELLPKDAKTLAAWGEFYRKNGSIPANTDVAAVVKATLDPGVFTPAR
NODE_12_length_136487_cov_12.6804_ID_29	fig|857335.5.peg.447	NODE_12_length_136487_cov_12.6804_ID_29_8733_7657	8733	7657	-	Dibenzothiophene desulfurization enzyme B		atgggtaatcaagccgaccagcaaatcctcgccccctcatcaggcacgctgatcgaggcctactacaccatctgcccggttttcgtggcatccaacatcgcagtcgagctgggctggctggatgaggaattccgccgggcaggcgcgagtgccgtgtatctgcgcagcctgccagacaacgccggctggctgccgcattaccgccactcgctgccccgcttgttccgcgacggcggagcgattccgaccatccatgcccgtgctgatctcgccaacacctacctgattgcttccaccttcacgcagaccggcggcaagatcatcgtgcgggccgatgcaggcatccgtcgcgtggccgacctcaaggggcggcgcatcgggctgagccacagcctgaat…	MGNQADQQILAPSSGTLIEAYYTICPVFVASNIAVELGWLDEEFRRAGASAVYLRSLPDNAGWLPHYRHSLPRLFRDGGAIPTIHARADLANTYLIASTFTQTGGKIIVRADAGIRRVADLKGRRIGLSHSLNTEKIDFTRITAQRGILLALQLAGLGEQDVEIVDTDEADTPVFQPAVRPFEFWQQFPSTPQTAGADLQALREGRVDAVYGHETRAASLVASGEFTVIEDLSRHPDWTLNVANAPFTTAVNADFAEAHPEVVIAFLRAAIRAGRWINANRAAAAEIFARVTIHRDPALIASLIAGYDFVPTLSAQNLAGLEIQKRFLLERGYIRNDFSIREWARPGYLEQALASLAA
NODE_12_length_136487_cov_12.6804_ID_29	fig|857335.5.peg.448	NODE_12_length_136487_cov_12.6804_ID_29_9131_10753	9131	10753	+	Methyl-accepting chemotaxis protein I (serine chemoreceptor protein)	FIG00005728	atgtctttgaaaaaatggacagtagcaggccggcttggcctgctggtagccggcctgctactggccactttgctggttgggctggcgagctttatcgaaggccgcaggatgcaggccggcttcgcttcgatctacaacgacagcatcgtcccggtggatcagctcaagcatgtctccgatgcctacgccgtaaacatcgtcgatgcgacccacaaggtgctggacggcatgatcggctcttccgtggccgttgaaggcatcgaagaagcgcgcaaggtcatcagcacggaatggactgcttacacgggcaccaacctcaccgaagaagaaaatgtgctggtcgccaaggccgaggagctgatgcccaaggccgacaacgccgccaaccgggcgctgatg…	MSLKKWTVAGRLGLLVAGLLLATLLVGLASFIEGRRMQAGFASIYNDSIVPVDQLKHVSDAYAVNIVDATHKVLDGMIGSSVAVEGIEEARKVISTEWTAYTGTNLTEEENVLVAKAEELMPKADNAANRALMLIQSNDSEGLRMFAAQELYAAIDPISAVIAELVDLQLKEAQRDFQQAEAAHARSTLVNLTLLGLAVVLGTLAGYAIIRQLTQELGDEPAAVAQLAARVAKGDLSGDIRVRRGLEGSVMGSMAAMHRNLRELAQELRANANEVTSSAQALTGVAQQVAHSSASQADASSAIAAAVEEMAVSIDTIADHSAQAKDTSGTSTDSAIAILDGVRADVTRIASTVTASSTTIGDLTAKSSQIAAVVSVIKEVAEQTNLLALNAAIEAARAG…
NODE_12_length_136487_cov_12.6804_ID_29	fig|857335.5.peg.449	NODE_12_length_136487_cov_12.6804_ID_29_12222_11263	12222	11263	-	Zinc ABC transporter, periplasmic-binding protein ZnuA	FIG00021555	atgcgtcatgtttcgttgaaaacggtgccggccgcactgttcgcgtcctgcctcatcctgtctggatcggtggcgcaggcccaggagaaactgaagactgtggctaccttcagcatcctgggggatctggtcaggcaggtcggcgggaagcgggtcgaggtggccgtgctggctggcccgggcgccgatgcgcatgtcttccagcccacgccggcgcatgcccgcaccgtggcgcaggcccgtgtgctgttcgccaatggcgcaggtttcgagggctggatggagcggctgctgaagtcgtccggcttcaaggggcgtcaggtggtggcgagccagggcgtgaagctgctgggggaggcggaggaggacgggaagcacgcccatgggcacgaggatcac…	MRHVSLKTVPAALFASCLILSGSVAQAQEKLKTVATFSILGDLVRQVGGKRVEVAVLAGPGADAHVFQPTPAHARTVAQARVLFANGAGFEGWMERLLKSSGFKGRQVVASQGVKLLGEAEEDGKHAHGHEDHKHGHDHDHEHGGQDSHAWQSVPNAILYVKNIAAGLCAADAAGCPSYERNAAAYTAKLQTLDGEIRAAWARIPQAQRKLITSHDAFGYYAQTYGVRFLAPQGVSTEAEASAKGVAQLVRQIRQEGIKALFVENISDPRLIEQIARETGLKPAGALYSDALSAGAPAATYADMMRHNTRLLTEAITAR
NODE_12_length_136487_cov_12.6804_ID_29	fig|857335.5.peg.450	NODE_12_length_136487_cov_12.6804_ID_29_13096_12227	13096	12227	-	Zinc ABC transporter, inner membrane permease protein ZnuB	FIG00005113	atggcactgctgagcatcctttcgcccctgttcgagttcggcttcatgcagcgcgcgctggtcggcagtctggcgctgtcgctgagcgcggcgccgttgggtgtgttcctgatgttgcgccgcatgagcctcacgggggatgcaatggcgcatggcatcctgccgggggctgcgctgggctacctgatcgcggggctctcggtcggcgccatgaccatcggcggcatcatcgccgggctggccgtggcggtggcttccggtctggtagcccgcagcacggtgctgcgcgaggacaccagcctggcctcgttctatctgatctcgcttgcgctgggcgtgctgctggtctccacgcgtggcagcaatgtggatctgctgcacgtgttgttcggtacggtg…	MALLSILSPLFEFGFMQRALVGSLALSLSAAPLGVFLMLRRMSLTGDAMAHGILPGAALGYLIAGLSVGAMTIGGIIAGLAVAVASGLVARSTVLREDTSLASFYLISLALGVLLVSTRGSNVDLLHVLFGTVLALNDEALWLLGGVASVTLLGLAMLFRPLVLECLDPGFLRSVSRWSPVAHYGFLALLVLNLVAGFHALGTLMAVGYMVLPAAASRFWVREITPLLSLSALLAFAGSLGGLLLSYHADLPTGPAIVLCLGLIYLVSLVLGRQGLLCARLRQTKHLRA
NODE_12_length_136487_cov_12.6804_ID_29	fig|857335.5.peg.451	NODE_12_length_136487_cov_12.6804_ID_29_13923_13099	13923	13099	-	Zinc ABC transporter, ATP-binding protein ZnuC	FIG00059280	atgagcgtcgtttgcgggccggcgatccggctggaaaacctgacgctgggctacgagcgtcatcccgtggtgcatcacgtttcgctggaaattccagcgggcggactggtggcggtggtggggccgaatggcgccggcaagtccacgctggtgaaggcgctggcggggctcaagaagccattgcaggggcaggtgcacgggctgaggggacagcgcgtggcctatctgccgcagcacgccgagatggatcgcagctttccgatcaatgtgctggacatggtggccttcggcctgtggcatgagacgggggcactgggagggctcgaccgcgcgcagcgcgagcgctgccatcatgcgctggagtccgtgggcctgcagggcttcgcgggccgcaccatc…	MSVVCGPAIRLENLTLGYERHPVVHHVSLEIPAGGLVAVVGPNGAGKSTLVKALAGLKKPLQGQVHGLRGQRVAYLPQHAEMDRSFPINVLDMVAFGLWHETGALGGLDRAQRERCHHALESVGLQGFAGRTIDTLSGGQFQRALFARLLLQDAPVILLDEPFTAIDARTTEDLLKLLHRWHAEGRTVLAVLHDLAQARAHFSHAMLLARELIAWGAPAEVLGPGNLARSMGMHEAFDDEAPPCEVPEGPAATVQAHDHRHGHAHGHVHAGEEV
NODE_12_length_136487_cov_12.6804_ID_29	fig|857335.5.peg.452	NODE_12_length_136487_cov_12.6804_ID_29_14036_13920	14036	13920	-	hypothetical protein		atgaagcctgatccttcccgttccagcgccttgcagcgctcagccctgttgcgtgtggtgctcgtgcttggcgcctgcctcctgctctggcttgccttgctgggggccatggcatga	MKPDPSRSSALQRSALLRVVLVLGACLLLWLALLGAMA
NODE_12_length_136487_cov_12.6804_ID_29	fig|857335.5.peg.453	NODE_12_length_136487_cov_12.6804_ID_29_15614_14199	15614	14199	-	Transcriptional regulator, GntR family domain / Aspartate aminotransferase (EC 2.6.1.1)	FIG00005520	atgttgcagatcagcctcgcgcccgacagcaccgtacctctcgttgaccagatcgtgcaggccgtgcgcggccagatcgaggatcgggtgttgcgcccgggcgcccggctgtcagccatccgccaattcgcggaggcccatcgtgtcagccgttttaccgtggtcgaggcctatgaccgtctggtggcccagggctacgtgcagtcacgccggggctcaggtttctatgtggcgaatcgcagtcttcccgccgcagcctcggccgcggcggcacccgaagtgcctgaggcagcgctggatgccgcctggttgatgcggcaggcactggatgccggtgccgagggcctgcgcgccagtgcgggctggctgccgcacagctggatggacgaggatggcttg…	MLQISLAPDSTVPLVDQIVQAVRGQIEDRVLRPGARLSAIRQFAEAHRVSRFTVVEAYDRLVAQGYVQSRRGSGFYVANRSLPAAASAAAAPEVPEAALDAAWLMRQALDAGAEGLRASAGWLPHSWMDEDGLRRQMRAMLRDEGSKFADYGSPQGYLPLRQHLPFRLGELGIAAQPTQIVLTLGATQALDMAIHHYVRRGDAVLVDDPGYFSLFGLLRLHGARLIGVPWTPEGPDPVELERLAAEHKPKVYFTQSVLHNPTGACLSPANAYRILQCAARHDFHIVEDDTYCDLHPGVTTRLAALDQLDRVIYISSFSKTLSGDLRVGYIAARPDIAEALTNIKVLISMTTPATAEALIYRMLTEGHYRKYVERLRNRLSEAGARALRLADKTGLSPFI…
NODE_12_length_136487_cov_12.6804_ID_29	fig|857335.5.peg.454	NODE_12_length_136487_cov_12.6804_ID_29_15753_16001	15753	16001	+	hypothetical protein		atgtcgccacaggaaacttcgccctccatcccctcgggaatccgcctgcttcaacgtgcagcctgcatcctggccttggtgctcaccccctttctgctcgccctggcaggcaaggccatgcaggcctggcaaccggatctgccgcagcacttcgatgctcagcgtcaggtgttgttcactgcccagaccgatggcagcgtacggccaggagctgcacgtgcagggagacgacgcactctaccggtatga	MSPQETSPSIPSGIRLLQRAACILALVLTPFLLALAGKAMQAWQPDLPQHFDAQRQVLFTAQTDGSVRPGAARAGRRRTLPV
NODE_12_length_136487_cov_12.6804_ID_29	fig|857335.5.peg.455	NODE_12_length_136487_cov_12.6804_ID_29_17009_16134	17009	16134	-	Transcriptional regulator, LysR family	FIG01304134	atggaacgcctgatcaacatggcgagcttcgccgaagtggtggaagcgggcagcttctcggcggcggccgagcgtctgggatgctcgcgggccgtgctcagcaagcgcatccgcgtgctggaacaggattttggtgtcaccctgctgcatcgcacgacgcggcggcagagcctgaccgaggccggagaggcgctgtatgcccattgccggcgtgtgctcgatgaaatgaacagcgccgaagcgcgcctgcaggcgctcaccagtacgccttcgggcaccttgcgcatctcggcgccgcattcctgggggaatcgtgtactggcgccacggctggcggcctttctgctccagcatccacaggtccgcgtggaacttggcttgtcggatcacatggtcgat…	MERLINMASFAEVVEAGSFSAAAERLGCSRAVLSKRIRVLEQDFGVTLLHRTTRRQSLTEAGEALYAHCRRVLDEMNSAEARLQALTSTPSGTLRISAPHSWGNRVLAPRLAAFLLQHPQVRVELGLSDHMVDLAGSAVDVALRLTSTPAPGLVARHLADLPYVICAAPAYLALHGEPAHPRELAQHRCVHFVGETVQNPWRISDAQGVLHEVAVRGPLVANSTEVLRTMARAGLGIIMLSRYLIEDELASGQLQPILRDCTPPVQQLHLVTLPDRLLAAKTRAFIDFMRA
NODE_12_length_136487_cov_12.6804_ID_29	fig|857335.5.peg.456	NODE_12_length_136487_cov_12.6804_ID_29_19500_18091	19500	18091	-	polyguluronate lyase precursor		atgaagaaaccgatcctgtcgggggcgctgtcggcgctcctgttggttgcctgtgcgacgccgcctgcagacagggctgcgcctttgtcgcgtgtcatcgtggaggcggagtcattcacggcgcagagtggcgggcagctagtgcggcgaacgggccgccccggtacctcggggaatgtctcgatctcggcctgggatcatcgtgaccatgtcgtcgaatggcaggccgaggtgccgcgtgacggtaaatatgccgtcgtgcttcgttatgccggtggccggagctgggccgtctatcgcgatctgcagattgagggggcgcagctgccaccggccttctcacgcatcgcctggacacccaccggcggcttcggaaccgaggccgggcagtggcgtgat…	MKKPILSGALSALLLVACATPPADRAAPLSRVIVEAESFTAQSGGQLVRRTGRPGTSGNVSISAWDHRDHVVEWQAEVPRDGKYAVVLRYAGGRSWAVYRDLQIEGAQLPPAFSRIAWTPTGGFGTEAGQWRDLVVSDAQGRPVWVTLKAGSVSLRMRNLGGDGADGSGNLDLIALIPECAEFTPPLAPAQQPVMSRAAPKTQPPQADGQRAHATLNPGDLAALEHLRDWKLTLPVQGAGKAWAEEVQQPALGKLSRQPWFFVDEAGTGVVFRANAGGARTSNNTRFARSELLQMDTAYDGDRQIRYERRGWDLADGVARRMFIDQTITAVPLQKPQVVVGQIHNARDDVLMLKFEGDSPGRRSVRGALQVRLNNAKDVYVIDPAYVLGTRFTVEIIAH…
NODE_12_length_136487_cov_12.6804_ID_29	fig|857335.5.peg.457	NODE_12_length_136487_cov_12.6804_ID_29_20365_19592	20365	19592	-	Short-chain dehydrogenase/reductase SDR	FIG00440067	atgttcaatgatctcaagggcaagcgcgtcctcatcaccggctccaccgcaggcatggggctggcaaccgcccgcctcttcgcccggtatggcgcccgtatcggtctcaacagccatgtcgcggagggcgcggccgaagccgttgccgaacttcaggctctcgggggcgaagccgaatttttccaggccgatctgatgcagacccgtgagtgcgccaaactcatcgaagcctttgtggcccgtttcggcgggctggatgtgctgatcaacaatgcgggcggtctcggtggccgggccgggctggagtcggtcgatgatgcgttctacgaccgggtgatgaacctcaacgtgcgttcggtactgatgaccacgcgcttcgcgattccgcatctgcgggcg…	MFNDLKGKRVLITGSTAGMGLATARLFARYGARIGLNSHVAEGAAEAVAELQALGGEAEFFQADLMQTRECAKLIEAFVARFGGLDVLINNAGGLGGRAGLESVDDAFYDRVMNLNVRSVLMTTRFAIPHLRASAAASGQTASVISTGSIAAREGGGVGAGIYAGAKAWVHDVHRNWVKEFTSAGIRFNVVSPGTIDTAFHDGKSDELRAKIAASIPMGRFGRIEEVAPTFLFFASHACSGYITGQILDVNGGQIAP
NODE_12_length_136487_cov_12.6804_ID_29	fig|857335.5.peg.458	NODE_12_length_136487_cov_12.6804_ID_29_22625_20457	22625	20457	-	poly(beta-D-mannuronate) lyase (EC 4.2.2.3)	FIG00103367	atggaaacccccgaataccaaccgctgctgatcagcttcgccgaggccgaagcgctgcgccacgaactcgggcgcgacagcctgatggggcgctcgctgcaggccgagcgcgccgtgctggagcgctatatggcagcgcccatcgagatccccggccacggcgaggccggcggctacgaacacaaccgccacaagcagaactacatccacctgaacctggccgggcgcctgttcctgatcacgcgtgagccgcgcttcctggattacgcccgcgacatgctgctggcctatgccgaggcctacctcgacatcccgctcaacaccagccgcgacagcaacaagcccggccgcctgttccaccagacgctcaacgagaacatgtggctgctctacgccgcc…	METPEYQPLLISFAEAEALRHELGRDSLMGRSLQAERAVLERYMAAPIEIPGHGEAGGYEHNRHKQNYIHLNLAGRLFLITREPRFLDYARDMLLAYAEAYLDIPLNTSRDSNKPGRLFHQTLNENMWLLYAAEAYSCIRYRLSDAQRALVEQRLFRPMVALFSETYAHDFDIVHNHGLWSVASVGMCGYAIGDQSIVDRALYGLRGDSSSGGFLAQLAQLFSPDGYYIEGPYYHRFAIRPLLLFAEAIERRQPGLAIYQFKQQVIRRTTEALMSLAFPDGTFPALNDASKTMGIRDEGLMIATSLCFWRYGADTKLIAMARLQDRVWVGGAGLALSDAALTQPPAQLNWGSVQLSDGPDGQRGGVGILRQADAEGDLDMALMWYGQHGSDHTLHDALD…
NODE_12_length_136487_cov_12.6804_ID_29	fig|857335.5.peg.459	NODE_12_length_136487_cov_12.6804_ID_29_24762_22630	24762	22630	-	poly(beta-D-mannuronate) lyase (EC 4.2.2.3)	FIG00103367	atgaagcagcctgattccatttcccccgccctgtttcctctgtactccgcggtacagctggaggccttgcgtgccgctgtcattgagccggggcctgtcggccagagcctcgcggccttgcggcaacggttcgagccctggctcgcagttccccccgaggtgcccgggcagggcgaggccggcagcgatgcccacaaccgtcaccagctcaactaccagctcatcgaggctgccggcagcctgtatctgctcagcggcgagcagcgatatgcggattggatcgaaacggcgctgacacgctacgccaacgtctacctgtcgatggatttccatccccagcgcaacaccaatccgccggggcggctgttccaccagatgctcaacgagacgatgtggctg…	MKQPDSISPALFPLYSAVQLEALRAAVIEPGPVGQSLAALRQRFEPWLAVPPEVPGQGEAGSDAHNRHQLNYQLIEAAGSLYLLSGEQRYADWIETALTRYANVYLSMDFHPQRNTNPPGRLFHQMLNETMWLLYASLGYGCVRHTFDAARRAHIEGWLLRPMVELFTVRYAHDFDHIHNHGLWAVAAVGLCGIAIGEPRFVDMAVDGLAGDRRTGGFLAQISQLFSPDGYYIEGPYYHRFAIRPLCLFAEALQLHRPELEIYQFKDRVIRTTIRALLATAYPDGRFPALNDASRSMSIRDEGVLIAVAIHAARYGCDATLLATAQQQGQVWVHPAALALADTAPEGAGHWPSTELREGPDGTRGAQGFLRSANAAGEISQVLMNYGQHGMGHGHFDTL…
NODE_12_length_136487_cov_12.6804_ID_29	fig|857335.5.peg.460	NODE_12_length_136487_cov_12.6804_ID_29_26420_24870	26420	24870	-	ABC transporter, substrate-binding protein	FIG01315481	atgaaaaagacgatagtgccgctgatgctcgcgacgctgctggcgggaactgtacccgcccaggcgaaggagccgacctggatcaccgacaagccgctgacgctgaagatccacctgcatgcgcgcgacaaatacgtgtgggacgaaaacctgccgatgagtaaggaactcttccgcctcaccaacctgcaactggtgggcaccgccagcaagacggccaccaacagccaggaacagttcaacctgatgatggccaccggcaagctgccggacatcgtgggcggcgacagcctcaaggacaatttcatccgttacggcatggaaggcgccttccagccgctcaacaagctgatcgatcagcatgcccccaacctcaaggccttcttcgacagccatccc…	MKKTIVPLMLATLLAGTVPAQAKEPTWITDKPLTLKIHLHARDKYVWDENLPMSKELFRLTNLQLVGTASKTATNSQEQFNLMMATGKLPDIVGGDSLKDNFIRYGMEGAFQPLNKLIDQHAPNLKAFFDSHPQVKRAITAPDGNIYFIPYVPDGKVSRGWWIRKDWLDKLGLKEPQTINELYTVLKAFREKDPNGNGKKNEVPFFDKEPERLYNLVNFYGCRATGSDASMDFYVDDNGKIRHPFAEPCFKDAIRNLAKWYAEGLIDAEIYTRKNRAREQLFSANQGGMTFDWFASTAGFNDSISKTVPGFKLVSIAPPADINGRRWLENSRADMRPDGWAMTITNKNPVETIKLFDFFFSRAGRNLQNFGVEGLTYDMKDGKPQFKESVLKNAKPVNN…
NODE_12_length_136487_cov_12.6804_ID_29	fig|857335.5.peg.461	NODE_12_length_136487_cov_12.6804_ID_29_26457_26576	26457	26576	+	hypothetical protein		atggccgcgcgatctctggtgcttcagtgccagtgcggcgcaccggccatcggacagctttctgcctgcgcacggcccggacacggagccccggccagcggcatcttcctcactccttga	MAARSLVLQCQCGAPAIGQLSACARPGHGAPASGIFLTP
NODE_12_length_136487_cov_12.6804_ID_29	fig|857335.5.peg.462	NODE_12_length_136487_cov_12.6804_ID_29_27447_26566	27447	26566	-	Xylose ABC transporter, permease component		atgcttgcaacaccgttctactcgcggggcgaccggatcttcggccgcgtcaacgcgatcctgctggcgctgtgcgccatcatggcgatctaccctgtcatctacgtggcctcggtgtcgatgagtaccggtgcagcggtcacggccggcaaggtcttcctgctgccggtggacatcgacttctcggcctatgcgcgggtgtttcaagacaagctgttctggacgtcctatgccaacaccttcttctatacggtgttcggcaccattgccagtctcttcttcatcattccgagcgcctacgcgctttccaagcaccgcctgcgcgggcgccgcatcatcggtttctttatcgccttcacgatgtggttccacgccgggatgattccgttctatctgaac…	MLATPFYSRGDRIFGRVNAILLALCAIMAIYPVIYVASVSMSTGAAVTAGKVFLLPVDIDFSAYARVFQDKLFWTSYANTFFYTVFGTIASLFFIIPSAYALSKHRLRGRRIIGFFIAFTMWFHAGMIPFYLNISNLGMMDSRWGIIIAFACNAFNIILMRNYFESISQSFEEAARMDGANDLQILWKVYIPLSKPAIATVTLLCVIARWNGYFWSMVLLRSEDKIPLQVYLKKMIVEVNLSEEFSAAALAHSYSVETIVGAIIVMSIIPVLLIYPVVQKYFTKGVMLGGVKE
NODE_12_length_136487_cov_12.6804_ID_29	fig|857335.5.peg.463	NODE_12_length_136487_cov_12.6804_ID_29_28470_27508	28470	27508	-	Xylose ABC transporter, permease component	FIG01276112	atggcagacatccaaacttccgtacgcgagcccctgggcacgcgcctgcgccagggttggcaggccgcgctgaaggatctgaggcgtgactggctgctctacgccatgctcgcacccacactgatctggttcctggtcttcctctacatgccgctggacggcctgcaactggcattcaagcagtacagcgcctggaaaggcatcgatggcagcccgtgggtcggcttcgcacacttcgtcacgctgttccagagcgaacagttcctgcgggcggtcggcaacacgctgatcatcagcgcctattccatcgtgctggccttcccggtacccatcctgctggcgctgatgatcaacgaggtgcagtcacagcgctatcgcaaggccgtgcagaccatcgtt…	MADIQTSVREPLGTRLRQGWQAALKDLRRDWLLYAMLAPTLIWFLVFLYMPLDGLQLAFKQYSAWKGIDGSPWVGFAHFVTLFQSEQFLRAVGNTLIISAYSIVLAFPVPILLALMINEVQSQRYRKAVQTIVYLPHFISVVIVAGIVVAFLSPTTGVVNNALEFLGLDRIYFLTRPEWFRSIFIGSNIWKEAGFDSIVFLAAIMSINPALYESAQVDGASRWQMMTRITLPCIVPTIAVLLVIRLGRVLEVGFEYIILLYQPSTFETADVISTYIYRQGLQGARYDLATAAGVFNAVVALVLVLVANRLSRRITRTGVF
NODE_12_length_136487_cov_12.6804_ID_29	fig|857335.5.peg.464	NODE_12_length_136487_cov_12.6804_ID_29_29542_28481	29542	28481	-	Glycerol-3-phosphate ABC transporter, ATP-binding protein UgpC (TC 3.A.1.1.3)		gtgaagcgctatgaccgcacgacggtggttcatggcgtcagcatcgacatccagcccggagagttcatggtgctggtggggccgtccggttgtggcaagtccaccacgctgcgcatggtggccgggctggaggaaatctcgggcggcgagatccggatcgatggccgtgtcatcaacgatctggcgcccaaggatcgcgatgtggccatggtgttccagaactatgccctgtatccgcacctctccgtgcgcgacaacatttcctttggcttgcgcctcaacggtgcaaagaaggatgagattgccagcaaggtgaaaaccgcggcggacatcctggggctggattccctgctcgagcgcaagccttccgacctctccggcggccagcgccagcgcgtg…	MKRYDRTTVVHGVSIDIQPGEFMVLVGPSGCGKSTTLRMVAGLEEISGGEIRIDGRVINDLAPKDRDVAMVFQNYALYPHLSVRDNISFGLRLNGAKKDEIASKVKTAADILGLDSLLERKPSDLSGGQRQRVAMGRAIVRNPKVFLFDEPLSNLDAKLRTQMRAEIKRLHARPGTTVIYVTHDQVEAMTLADRIVVMRDGYIEQIGAPMELFNHPVNTFVAGFIGSPPMNLLPARLEAQGSGLGVRLADSCAIGIQPRGSSSVAAGQEVTFGIRPEDVSLTPKFAQGAQITGTVEIVEPLGSEAILHVQIGEHNLIVRVEGRRTVEVGTVVTLFVDLERVHLFDAQSSVSIY
NODE_12_length_136487_cov_12.6804_ID_29	fig|857335.5.peg.465	NODE_12_length_136487_cov_12.6804_ID_29_29510_29656	29510	29656	+	hypothetical protein		atgaaccaccgtcgtgcggtcatagcgcttcacgacattgcgaatattcactcctgctgccacacgctcctcctatgtctcatgagtgagggccaatccgctccgcaggcagtaccccctgcacaaatgctccggcccttcttgtaa	MNHRRAVIALHDIANIHSCCHTLLLCLMSEGQSAPQAVPPAQMLRPFL
NODE_12_length_136487_cov_12.6804_ID_29	fig|857335.5.peg.466	NODE_12_length_136487_cov_12.6804_ID_29_29907_30977	29907	30977	+	Transcriptional regulator, LacI family		atggaaatgcccgggaacgaagacaacggcagcggacgcccgcgccaggcggatgtcgccaaaaaagcgggggtttcgcccagcacggtatccaaggtcatcagcggcagcccgggaatcagccaggaattgcgcaaccgcgtgctcaacgccatgcgggaactcggttatgacgtaggcaatacccgtgacacagttgccgccagcaaacgtatcaagctggtgaccttcttccagttcctgacccgcgaaaacagttacttccactccgaagtcatctgcgccgtgctggccgaatgcgagcgcctgggcatcgagatcgacaccgtgctgctcaatcgcgacagcgacaacgatctggaacagtacgtcaccaggctggaggctggccgcgccgat…	MEMPGNEDNGSGRPRQADVAKKAGVSPSTVSKVISGSPGISQELRNRVLNAMRELGYDVGNTRDTVAASKRIKLVTFFQFLTRENSYFHSEVICAVLAECERLGIEIDTVLLNRDSDNDLEQYVTRLEAGRADGVLFVGLDMPEILQPVRDLGLPAVIINGTDPQSEFDCLAPALREGSRMATRHLIELGHREIVHVTHLYRNIIHRRMEGFKEALEEAGLPFSPERNVIDIDHDSHFSSDKAADLICSLIQAGKLTATAIFCVSDYTAFGVIQGIQRAGKRVPEDFSVVSFDDLPLAQLCSPTLTSVGVDRVALGRLAVQRLIDRWQNPDGPALRIEVGARLSERNSSRALEAGA
NODE_12_length_136487_cov_12.6804_ID_29	fig|857335.5.peg.467	NODE_12_length_136487_cov_12.6804_ID_29_30994_32172	30994	32172	+	Alginate lyase precursor (EC 4.2.2.3)		atgaacccgatggattgccatcccgaacgaattgccgcacctctccgccgggtgttgctgggcatcggcctgtgcctgggcagcctgtgcgccgcccagcaggcccaggctcactccttcgagcaagccgtggtgaaagaccccacggcctccttcatcgatgtgccggcacgccgtgcctaccttcagaaggccgtcaccgaaggacagctggacgaccgcctgcgcagcgcgctgccggcaatcgaagactgccgcagcacgccgcgaatccaggcgcagaccggtccgatggtgatcccctcccggtacctctccggcaacaccggggccatccatcccgactatgaacgcgtggtcgcgctttaccgggatttcgaggattcactgggcagactc…	MNPMDCHPERIAAPLRRVLLGIGLCLGSLCAAQQAQAHSFEQAVVKDPTASFIDVPARRAYLQKAVTEGQLDDRLRSALPAIEDCRSTPRIQAQTGPMVIPSRYLSGNTGAIHPDYERVVALYRDFEDSLGRLSSLYVLTGNSDYAGCVLDQLADWADAGALLDYTPSERKQAWYQTEWSVGVAAMSLSLVITDPALDAGKKTRVLDWLKRVSYKQISEPGADISCCNNHSYWRGLQATMIGALTGDDALYRWGLGRYAQGIGQIAADGSFPLEMTRREQALHYQNYALQPLTMIAQIASRQGLDLYAYRENGRDIHDAVRFTLAAIQDETLIARHASEKQNRRAFAAGRGDLAWMEYYRTRFPLPDLGPLLSKPFFYPRNGGAVTLFVYTP
NODE_12_length_136487_cov_12.6804_ID_29	fig|857335.5.peg.468	NODE_12_length_136487_cov_12.6804_ID_29_32376_33620	32376	33620	+	Na+ driven multidrug efflux pump		atgaagatatccatccgcccagacgtcctgcgtctgaccctgcccgttctgttcgagcagttcttcgtgcatctgctcggcaccgtcaacaccatcatggcctcacgcctgggcaaggaggcggtttccgccatcggcatggtggattccatcaacgccgtgatcaatgcgttgctctcggcactcgccatcggcgccacggtggtggtggcgcaatccgtggggcggggcaatcgcatccgcgcgggtgcgggcgcctggcatgcgctggcagccggcacgctcttcgccggtgtcgtggcgctgctgctgatcgtcgcgcgcggcccggtgctgcatttgctgtatcgcggcatcgatgccgaagtgatggcacacatggagacttatctcggcatc…	MKISIRPDVLRLTLPVLFEQFFVHLLGTVNTIMASRLGKEAVSAIGMVDSINAVINALLSALAIGATVVVAQSVGRGNRIRAGAGAWHALAAGTLFAGVVALLLIVARGPVLHLLYRGIDAEVMAHMETYLGISALAFPLTALTVIGCGALRGAGETASTMKVNTLINILNVVFSYVLIYGVQLPLGPFQLVVPAFGVAGAAAGLALARLGGVLYLARTLQFQHDVLPLGRARDWRFDATLLRAVFAIGIPASLESLVFNGGKLAVQVFIVSMGTVAIAANYIAFSISNLINIPGAALAVGLTTLVGHDAGRGDYTAARHTMWHVLRVSWVCMAVIGVLFIPLAPAVVGLYSPDPDVIDTGSLLVRMNCVFLICYPTTFVLPNGLKGAGDATYTLITTI…
NODE_12_length_136487_cov_12.6804_ID_29	fig|857335.5.peg.469	NODE_12_length_136487_cov_12.6804_ID_29_33611_33733	33611	33733	+	hypothetical protein		ttgggcgtaacgctgggcttcggtgtggtgggtgtgtggtgcgggatcatcgcagactggttcgtgcgcagtgcgctgtacgtgcaccgcctgtacggcacgcgctggcagcgcgcaggctag	MGVTLGFGVVGVWCGIIADWFVRSALYVHRLYGTRWQRAG
NODE_12_length_136487_cov_12.6804_ID_29	fig|857335.5.peg.470	NODE_12_length_136487_cov_12.6804_ID_29_34158_33730	34158	33730	-	Nitrogenase-associated protein NifO	FIG00055259	atggcgcgtattgttttctacgagaaacccggttgcagcggtaacgcgaaacagaaggcctggctggaggctggcgggcatgtgctggaggtgcgcagcctgctggagtggccctggacgcgcgaggtactgctggagtggctgagggctttgcccgtggctgaatggttcaaccgctcggcgcctgcggtgcgtgacgggctgatctgccccgaggcagtgcagtcaggggaggccatcgatctgctcctggcgactcccctgctgatccggcggccgctgatcgcgctggaagatggcacgcgtctggtcggattcaacgaggcattgctgcggcgccatttgctgcaggtggcgaacgtcgccgcgcccagcgagggctgcgcctcgaagacacag…	MARIVFYEKPGCSGNAKQKAWLEAGGHVLEVRSLLEWPWTREVLLEWLRALPVAEWFNRSAPAVRDGLICPEAVQSGEAIDLLLATPLLIRRPLIALEDGTRLVGFNEALLRRHLLQVANVAAPSEGCASKTQKPCPDPRGA
NODE_12_length_136487_cov_12.6804_ID_29	fig|857335.5.peg.471	NODE_12_length_136487_cov_12.6804_ID_29_34218_34331	34218	34331	+	hypothetical protein		atgttgcatgagcagaaaattccgagcatcgcggcagccattgcggatgtgtgtgacaaaattttccgccccttgaaggcggcaatgaccgacacctgtgcgggaatgacgtag	MLHEQKIPSIAAAIADVCDKIFRPLKAAMTDTCAGMT
NODE_12_length_136487_cov_12.6804_ID_29	fig|857335.5.peg.472	NODE_12_length_136487_cov_12.6804_ID_29_34415_34729	34415	34729	+	Quaternary ammonium compound-resistance protein SugE		atggcttggatcctgttgacgcttgccggcctgctcgaagtcgcctgggccttttcgatgaagctttccaacggcttcacccgactggggccttcacttttcaccttcgtggcgatggtggccagcttcgcgctgttgtccatctcgatgaagaccctccccctcggcacggcctacaccatctggaccggtatcggtgccgtgggcgctttcctggtcggtatcctgatcctgggtgagcctgccagtgcgatgcggctcattgccgcggcgctgatcgtgagtggtcttctgctgatgaagttttcctcatga	MAWILLTLAGLLEVAWAFSMKLSNGFTRLGPSLFTFVAMVASFALLSISMKTLPLGTAYTIWTGIGAVGAFLVGILILGEPASAMRLIAAALIVSGLLLMKFSS
NODE_12_length_136487_cov_12.6804_ID_29	fig|857335.5.peg.473	NODE_12_length_136487_cov_12.6804_ID_29_36444_34765	36444	34765	-	diguanylate cyclase/phosphodiesterase (GGDEF & EAL domains) with PAS/PAC sensor(s)	FIG00561534	atgctgatgctggagcggttcttctggatgggggagaccccatccctgttgatgctgggggcgtatgacttccggctggtcacgctgtccgtgctgatctccatcctgatctgcagcatcgcgatgcagattgcgggcatcgccagggaaatccgcactcccagctatcgtcacctgaccttgctgacagggtcagtcgcacaggggatcggcatctggtcgatgcatttcatcggcatgctggccttcagcctctgtaccgccatcaattacaacgtcgccctgaccgcggtctccatcgtgccggccgtactggcgttctggatcgcgctggagatgctggcccgcgagcatgtggatcgctaccagttgatggcagggggtgttctgatgggggca…	MLMLERFFWMGETPSLLMLGAYDFRLVTLSVLISILICSIAMQIAGIAREIRTPSYRHLTLLTGSVAQGIGIWSMHFIGMLAFSLCTAINYNVALTAVSIVPAVLAFWIALEMLAREHVDRYQLMAGGVLMGAGIGEMHYVGMAAMEMAPQLRYDPRWFIASLVVSVTFAWFALWLRFGLRQHGRLAKPVITMLSGVVLGLAVAAMHYVAMGAARFVGEDDPGYVHELDIDLVLTITIVTLVLASAVLAGNLFLRFHMLYKQLRLSESCQKAIFDTAVDGVITIDPRGTMLSVNPSVTRLFGWMPEEMIGNNVTMLMPEPHHSHHAQYLNSYLGGGPARVIGIGRETTAKRRDGTVFPIRLAVGEVRVDDQIFFVGFIADISEQKRFEELLEREATQDP…
NODE_12_length_136487_cov_12.6804_ID_29	fig|857335.5.peg.474	NODE_12_length_136487_cov_12.6804_ID_29_38219_36594	38219	36594	-	transport protein	FIG01210157	gtgctgctgctgtttctgggcttttcggtggcggggctgacgctcggtggccaggcgatccgcctggccggcaacctgccgcagtacgagtcgacgattcgcgacaagctgcagacactggaccggctgacgctgggtaagttgaatgtcgtcgtcacgcaggccgacaggctggtcagccagctctcgccggaatccgccacgaccacggcgggagggctgacacccacgccggtgcagatcgtgccgacgcacgcaaagccgttcgaggtgatctcgaagatcgccgaagccgtgctgccgcccctgcagacggcaggcatcgtgctggtcgtgctgatcttcatcctgctcgactatgaatccctgcgggatcgcatgatccgcctgatgagcggc…	MLLLFLGFSVAGLTLGGQAIRLAGNLPQYESTIRDKLQTLDRLTLGKLNVVVTQADRLVSQLSPESATTTAGGLTPTPVQIVPTHAKPFEVISKIAEAVLPPLQTAGIVLVVLIFILLDYESLRDRMIRLMSGGNLRATTQAISDATERLSRFFVSQFAVNALVGSLVALGLGLAGLSGAMFLGALTAVSRFIPYVGIWLAAGAAMLMAAATSDGWMLMALTAAIYLFIEIVIAQFLEPRLYGHSTGLSPLSVVIAAIFWSALWGPVGLILSTPLTLCLVVAGRHVPALNFLEILLGDLSALTQVERFYQRALAGDSAELVRGLRRFLKDRPLHQFADQVVLPSIRLGYEEFSVHEVTQAEQLRMNSAVSALIDAMSRKPALRKRRRAGAVLDPQVSMT…
NODE_12_length_136487_cov_12.6804_ID_29	fig|857335.5.peg.475	NODE_12_length_136487_cov_12.6804_ID_29_38419_38180	38419	38180	-	hypothetical protein		atgtccggcacaagtaacgctccgcgctccgcctccgatcaactgccgcgcctgatcggtgcagccatcctgctggtgatgctcgattacgggcgcaatgtgctgatcccgatcgcgctggccatcgtgctggccttgttgatggcgcccctgatccgccgcctgcgccattgggggctcggcaggctgtggcgatctccgtgctgctgctgtttctgggcttttcggtggcggggctga	MSGTSNAPRSASDQLPRLIGAAILLVMLDYGRNVLIPIALAIVLALLMAPLIRRLRHWGLGRLWRSPCCCCFWAFRWRG
NODE_12_length_136487_cov_12.6804_ID_29	fig|857335.5.peg.476	NODE_12_length_136487_cov_12.6804_ID_29_39466_38561	39466	38561	-	Transcriptional regulator, LysR family		atgatccgcctcgacgatctgcgggttttcgtacatgcggcgcgtgccggcagtttctcggcggcagcgcgcgaactcgatctcagcccggcgctggcgagtggcgcagtgcagcgcctggagcgcgcgctgggcatacggctcttcgtgcggtccaccaggcgcatgcgtttgtctgaagacggcctgcgctatctgccacatgcacaggccatcctcgatgccgtcgcttccgggcaggaggcgttggccgaagggcgcgcgggggtcgccggcccgctgcgtctgtcgatgccttccgatcttggccgcaacgtattgctgcgctggctggatgaattccagcaactgcatccgcgcctgagcctgcatctgcacttgagcgatcagacggcggat…	MIRLDDLRVFVHAARAGSFSAAARELDLSPALASGAVQRLERALGIRLFVRSTRRMRLSEDGLRYLPHAQAILDAVASGQEALAEGRAGVAGPLRLSMPSDLGRNVLLRWLDEFQQLHPRLSLHLHLSDQTADFFRDALDASVRYGQLADSSLVALPLVPDNRRSLCAAPAYLARHGRPLAPDDLRHHNCLRYVMSEHTHERWRFQLPEGVRTVPVSGDRVSDDADIVRRWAVAGLGVVYKSRLDLGSDIAAGRLVELFPSGWGQPAPLQLVAAHRSALTPVVQQLRAFLAARFAQTQAED
NODE_12_length_136487_cov_12.6804_ID_29	fig|857335.5.peg.477	NODE_12_length_136487_cov_12.6804_ID_29_39574_39774	39574	39774	+	Bifunctional protein: zinc-containing alcohol dehydrogenase; quinone oxidoreductase ( NADPH:quinone reductase) (EC 1.1.1.-); Similar to arginate lyase	FIG01393346	atgaaagccatcggtttccaccagcctctgcccatcgaccacgccgaggcgctggtcgacctcgaactgcctgcccccgtcgccacggggcatgacctgctagagcctgttcacagtatccggaatgtgtttacattctggaatttgggtgtgagccatggatcggggaatgttgaacgacgcgcaatggaaacggattga	MKAIGFHQPLPIDHAEALVDLELPAPVATGHDLLEPVHSIRNVFTFWNLGVSHGSGNVERRAMETD
NODE_12_length_136487_cov_12.6804_ID_29	fig|857335.5.peg.478	NODE_12_length_136487_cov_12.6804_ID_29_40105_40491	40105	40491	+	Mobile element protein	FIG01306568	ttgaccaccaagatacacgcctgcgtggatgcactgggcaatccgatccgtctgatcctgactgcggggcaagaggccgacgtgacgcaaggtgcggcactggtggcagagattccaacaggcgccgtcattgctgacaagggatacgacagcgacgctctgatcgaaaccattgaggcctcgggggctcaggccatcattccgcctcggaacaaccgcacgatccagcgcgaaactgactggcatcgctacaaagcgagaaacctcgtcgagcgattcttcaaccggctcaagcagttccgtcgcttggcgacgcgttacgacaagctggccagtcgtttcagcgccttcttgcatctcgcatgcgcctatatctggctactgtga	MTTKIHACVDALGNPIRLILTAGQEADVTQGAALVAEIPTGAVIADKGYDSDALIETIEASGAQAIIPPRNNRTIQRETDWHRYKARNLVERFFNRLKQFRRLATRYDKLASRFSAFLHLACAYIWLL
NODE_12_length_136487_cov_12.6804_ID_29	fig|857335.5.peg.479	NODE_12_length_136487_cov_12.6804_ID_29_40619_41413	40619	41413	+	Bifunctional protein: zinc-containing alcohol dehydrogenase; quinone oxidoreductase ( NADPH:quinone reductase) (EC 1.1.1.-); Similar to arginate lyase	FIG01393346	gtgggtgacaaggtgacccgcttcaggccgggcgatcgcgtctggtatgccggcgagatcaaccggcccggcagcaatgcggaactgcaactggtggatgagcgcatcgtcggccctgcgccgcagcgcctggatttcgcagaggccgccgccctgccactgaccagcctcaccgcctgggaactgctgttcgaccgcctcaaggtgcaggatgccgaccccacggcagataaccgcctgctggtgatcggcgcggccggcggcgtgggctcggtactgttgcagcttgcacgccagctcaccggtttcaccgtgatcgccaccgcctcgcgcgaggaaacccgcaactgggtactgagccagggcgcccaccacgtcatagaccaccgtgagccctgg…	MGDKVTRFRPGDRVWYAGEINRPGSNAELQLVDERIVGPAPQRLDFAEAAALPLTSLTAWELLFDRLKVQDADPTADNRLLVIGAAGGVGSVLLQLARQLTGFTVIATASREETRNWVLSQGAHHVIDHREPWAPQLARLGLQDVSHVIGLNATDSYVPQIVEVLRAEGQLALIDDPKQFDIVPFKRKALSVHWELMFTRPLFKTASLTRQHDILRKMAALVDAGVVKTTLTQRLQGINAANLRQAHAQLERGSTRGKIVLEGF
NODE_12_length_136487_cov_12.6804_ID_29	fig|857335.5.peg.480	NODE_12_length_136487_cov_12.6804_ID_29_41521_42438	41521	42438	+	Permease of the drug/metabolite transporter (DMT) superfamily	FIG00846773	atgtcctcatcgccagcagcagccggccagaaggcggattgggccggcattgccatgctgaccttgccccccttgttctgggcgggcaatttcatcgtcgggcgcgccatgcgcgataccgtgccgcccctggcgctatccttcgaccgctgggtgatcgccttctgctgcctctcccccttcgcctggagggcaatgctgcgggatctgccgcgctaccgggaattcttctggcgcctgctggggctggcagccaccggcgtggcggcattcaacgtgctggtgtatttcggcctgcaatcgacgagtgcggccaacggcatgatgctcaactccttcatccccctgctgatcgcaggcatcggcgcgctgttctaccggcagcggctcacgccggca…	MSSSPAAAGQKADWAGIAMLTLPPLFWAGNFIVGRAMRDTVPPLALSFDRWVIAFCCLSPFAWRAMLRDLPRYREFFWRLLGLAATGVAAFNVLVYFGLQSTSAANGMMLNSFIPLLIAGIGALFYRQRLTPAQIAGFIVSFFGVTLIVSHGDPRTLASQGLSQGDALVFIATVCWAFYTLWLRQIPAEIDRLGLMLAQIVIALVLLAPLLAWEMASGRHVVWGTNSLLAIAYVGVFPSVLAFVLYGAGVMRVGAARAGLFIHLLPVFGTLLSVTLLREPLHGYQLFGMGAILAGVAWANRPAGR
NODE_12_length_136487_cov_12.6804_ID_29	fig|857335.5.peg.481	NODE_12_length_136487_cov_12.6804_ID_29_42587_44716	42587	44716	+	diguanylate cyclase/phosphodiesterase (GGDEF & EAL domains) with PAS/PAC sensor(s)	FIG00561534	atgatgacttctccgctgatcagcgcttacctggtctcagtcggcatcctcctgatggccggcgcgcatgccgcgatcctggcctgtggccggaaccacgcggccgcgaagtgcttgttcgccgcgctgtgcttcggcttcgccggtttccagttcttcaacgccatgcagaacgcagcgccggatcatgccagtgcgctggcggcgcaccgctgggtcggcttcttctccatcctcgtcatcccgctgatcggctgcgcgaccgcagccctggatacgcgtcgcttcccgctgcgcacgatgctcgcgctgatcgccttttccgccctggcgatcacctacaacttcctcacgccttacggttaccgcttctacaagctcgcacccgacctgatgctg…	MMTSPLISAYLVSVGILLMAGAHAAILACGRNHAAAKCLFAALCFGFAGFQFFNAMQNAAPDHASALAAHRWVGFFSILVIPLIGCATAALDTRRFPLRTMLALIAFSALAITYNFLTPYGYRFYKLAPDLMLTLPWGEHVWLIRGEPTLIYRLIRLVSLCVMIYMMQVVFSHAQLRDRLSRLLIGAGVAVLMVAALLAGMSDSGTLAIPYLGGFVFVFLAGAFSLLIRRELIRHALNEKRIERALHREARSRRLADARADRNLHTDTLTGLPNRAGFFLKLQALMAQGAHQDAMIVVLRLDIDRLGILKGTHGIATSDEALLKASQRLLDNIRNSDVLARTSNDGFALIGNHLADKAGIEAFRRKLGSIFEQAFDIGGHSLKLTACVGTAIFPDDALS…
NODE_12_length_136487_cov_12.6804_ID_29	fig|857335.5.peg.482	NODE_12_length_136487_cov_12.6804_ID_29_45108_44734	45108	44734	-	P-loop containing Nucleoside Triphosphate Hydrolase		atgatcgagcgggatatccgcgatgaggcgcgctgggtgctgtccggttcgctctgcagctggggtggtccgctactgccttatttcacgctggcggtattcctttccctggatccggcggtccgcatggcccgtatcgccgcacgtgagcagacgcggtatggcgaccggcttgagcctggtggtgatatgcgtcagcagcatctggagttcatggcctgggcgagcagctacgatcatgccagggcaccagtccgtagttttgatctgcatgagcgctggatgaccacgctgcattgcccagttatccgcctggattccgccgagcctgtcgagcacctgtgcgatgcggtgctccgtcagatggcgacctga	MIERDIRDEARWVLSGSLCSWGGPLLPYFTLAVFLSLDPAVRMARIAAREQTRYGDRLEPGGDMRQQHLEFMAWASSYDHARAPVRSFDLHERWMTTLHCPVIRLDSAEPVEHLCDAVLRQMAT
NODE_12_length_136487_cov_12.6804_ID_29	fig|857335.5.peg.483	NODE_12_length_136487_cov_12.6804_ID_29_45279_45163	45279	45163	-	hypothetical protein		atgaagggcctcgggatccacgtcttcggtgcttccggttccggcaccactacattgggtgaatgcttggccagggcgatcggtggacgccatctcgacacggattcgtactactag	MKGLGIHVFGASGSGTTTLGECLARAIGGRHLDTDSYY
NODE_12_length_136487_cov_12.6804_ID_29	fig|857335.5.peg.484	NODE_12_length_136487_cov_12.6804_ID_29_45725_45279	45725	45279	-	Histone acetyltransferase HPA2 and related acetyltransferases		atggagatgcgtgtcgccacggcgggtgatgttcaggcgatgttcgagttgcgcaccagcgtgcgtgaaaaccatatgtcacgtgcagcgctggccgagcttggcgtgacgccggagagccttcccggaatgctggagggatgcagccgtggctgggtcgttcatgaagagggcgtcctgctcggttttgccatggcggatgccggtgaggcctgtgtcttcgcgttgttcgtgcatccggcacatgaggggcgaggcgtaggccgacggctgctggacacggcagagggctggctgctttcgcaggcgtgcagcgaggcctggctgctgaccgacagtcgccccgaggtcagagccaacggcttctatcgcgctctgggctggcgtgccgaaggcgtc…	MEMRVATAGDVQAMFELRTSVRENHMSRAALAELGVTPESLPGMLEGCSRGWVVHEEGVLLGFAMADAGEACVFALFVHPAHEGRGVGRRLLDTAEGWLLSQACSEAWLLTDSRPEVRANGFYRALGWRAEGVQDDGQMLFRKRLVAG
NODE_12_length_136487_cov_12.6804_ID_29	fig|857335.5.peg.485	NODE_12_length_136487_cov_12.6804_ID_29_45998_45774	45998	45774	-	hypothetical protein		atggccaagaaattcccgatccaccccgcgcacccggaacgcatctgctggggctgcgacaagtactgcccggcgggctcgatggcgtgtggcaatggttcggagcgcacgccccatccggtcgaaactttcggtgacgactggttcgaatggactccggaaagtcgggatcagccggagcaggtagctgaggcgatgccatcgacgcgagactccgcgacctga	MAKKFPIHPAHPERICWGCDKYCPAGSMACGNGSERTPHPVETFGDDWFEWTPESRDQPEQVAEAMPSTRDSAT
NODE_12_length_136487_cov_12.6804_ID_29	fig|857335.5.peg.486	NODE_12_length_136487_cov_12.6804_ID_29_46637_46029	46637	46029	-	Transcriptional regulator, MarR family	FIG00554610	atgtcgtttctctccgttggcggcgggccgggcgccgtcgatgacgcccccgcgcattcaaaaatccatcaccacatgatgtatttgcagcgtaagatacatcacaacttgatgcaagttcgcccggatcaaaccatgctgaccaagcaacactacgaagcgctctcggaattccgctaccaactgcgccgcttcctgcatttcagcgagacggccgccaagcaggagggcatcacgccgctgcaatacctgctgctgctgcatgtacgcggttttccggggcgggactgggccaccgtcggcgaactcgccgagcgcctgcagatgcatcaccacggcgccgtggcgctgctcacgcgctgcgaggagctggatctggtggagcggcgcaagagcgag…	MSFLSVGGGPGAVDDAPAHSKIHHHMMYLQRKIHHNLMQVRPDQTMLTKQHYEALSEFRYQLRRFLHFSETAAKQEGITPLQYLLLLHVRGFPGRDWATVGELAERLQMHHHGAVALLTRCEELDLVERRKSEADRRRVEIHLKPAGEQHLQRLAALHEAELRSLQETFRVARITAFNDEDRESAAPGPASPAPRRGRRQAS
NODE_12_length_136487_cov_12.6804_ID_29	fig|857335.5.peg.487	NODE_12_length_136487_cov_12.6804_ID_29_46636_47223	46636	47223	+	PNPOx/FlaRed_like super family		atgcacaagaccatcgaagccaaggccctgtactggggcaataccgtcatcctgctgagcaccatcgatgccacggggcagaccaacatcacgccgatctcgtcgagctggtcgctcggcaagggcatcgtgatcggcctcagcctgaacggcaaggccatcgagaatctcgaacatcacccggaaatcgtgctgaacgtggccagtgcggatctcgccagccaggtggcggccatcgagcgctttacgggcaaattgccggtgccgccggaaaaggagaaagccggtttttcccactgcgccgacaagttcgccgccgccggcttcacccccgagccctccgtgcaggtccgcccggcgcgcatccgcgaatgcggcatccaggtggaatgcacggtg…	MHKTIEAKALYWGNTVILLSTIDATGQTNITPISSSWSLGKGIVIGLSLNGKAIENLEHHPEIVLNVASADLASQVAAIERFTGKLPVPPEKEKAGFSHCADKFAAAGFTPEPSVQVRPARIRECGIQVECTVAHITRRDGFAIVELQVRCVHAAESLLKESDRIDATRWQPLIYNFRSYHGITASMGGNFRFEN
NODE_12_length_136487_cov_12.6804_ID_29	fig|857335.5.peg.488	NODE_12_length_136487_cov_12.6804_ID_29_47732_47277	47732	47277	-	NnrS protein involved in response to NO	FIG00001178	atgggggactggcacgtcggccggccgctgctgcgccgctgggcgctgatactctacgcggtgtatgcgctgatggccgccggctacgccgcgatggggctggcggtgctcggcgacgcggcggcctggctgggcgccggccgccatctgctgacggtgggcgccttcggcctgtcgatctactgcgtgatctgcatcgccgggcgcaatcacagcggtctggaactggacgaacgcgcctgggtgcccatcggcgccgcgatgatcgtcaccgccagtctgctgcgcaccgccatcgcctggccggggctgcccgccggctggctcgcgcccttcgcctacggcctgccctcgctgctgtgggccggcgccttcgccctgctgagctgccgtcttggc…	MGDWHVGRPLLRRWALILYAVYALMAAGYAAMGLAVLGDAAAWLGAGRHLLTVGAFGLSIYCVICIAGRNHSGLELDERAWVPIGAAMIVTASLLRTAIAWPGLPAGWLAPFAYGLPSLLWAGAFALLSCRLGPVLWRARADGRRGCMGPP
NODE_12_length_136487_cov_12.6804_ID_29	fig|857335.5.peg.489	NODE_12_length_136487_cov_12.6804_ID_29_48484_47732	48484	47732	-	NnrS protein involved in response to NO	FIG00001178	atgacacgcatgccactgcccgcctgcctgcgcctgagccacccgctctggcagtgcggcttccgccccttcttccttaccggcagcctggtcgccgtggcgctgatgctgctgtgggggctgttcctcggccacggcttgccgctgctgccgccagccgccctcgcattgccggcggggccgttcggctggcatgcgcaagggctgctgttcggtttcggctttgccgccgtggcgggcttcgtgctggtggccgggccggaattcaccgatacgccgccttttcccgagcgctatggccgcacgctggccgcctgctggctggtgggcgtgctggcgtcgggcttcgcgcatccgctcgccgtgctgctcaccgcgttggcctgggccggtctgctc…	MTRMPLPACLRLSHPLWQCGFRPFFLTGSLVAVALMLLWGLFLGHGLPLLPPAALALPAGPFGWHAQGLLFGFGFAAVAGFVLVAGPEFTDTPPFPERYGRTLAACWLVGVLASGFAHPLAVLLTALAWAGLLGGLLALLLPRLWADPERRQMAFAWGIGGLLLVALGHQADLLRSLPPQRWLHACVGLMMMLVVVALSRISMRIVNLAIEEYHAEHAVLTSGADAEDSDALAGRHPVYLARPPPPRSST
NODE_12_length_136487_cov_12.6804_ID_29	fig|857335.5.peg.490	NODE_12_length_136487_cov_12.6804_ID_29_49293_48493	49293	48493	-	ABC transporter, ATP-binding protein		atgacgcgccacctgccgggcaagcagctcggcgtccacgccctcgaatacgcctggcgcatccatccgatgttgcaggacatccatttccacctcggcgcgggcgaggtgctggcgctgctcggcccctcgggctgcggcaagaccacgctgctgcatctgtgcgccggcctgctggatctccaggcgggccgcctcgtcaacaccttcgcgcggccggccatgatgttccagcagccgcgcctgctgccctggcagaacgcgcgcgacaacatcgccctgagcctgcgcgccgagggcgtgccgcgcgctcgtgcgcgcgaggcggcacaggccatcggcctgcgcctggggctggattcgctggcgctggaggcctggccgcatgcgctctcgggc…	MTRHLPGKQLGVHALEYAWRIHPMLQDIHFHLGAGEVLALLGPSGCGKTTLLHLCAGLLDLQAGRLVNTFARPAMMFQQPRLLPWQNARDNIALSLRAEGVPRARAREAAQAIGLRLGLDSLALEAWPHALSGGMQSRVALGRALVTAPDLLLLDEPFAALDIGLKAQLHELLLEYRGQQSTAVLMITHDVMEAMGLADRILIMAPHPGRILHEYRPDLAPAARDAAWVHAETAKLLQVPLVRSCFELPGAAPAPRAAQMPRALSC
[truncated: 3,182 more rows]
