# Supplementary material for: Candidatus Dactylopiibacterium carminicum, a Nitrogen-Fixing Symbiont of Dactylopius Cochineal Insects (Hemiptera: Coccoidea: Dactylopiidae)
Source: Oxford University Press journal article supplement (doi:10.1093/gbe/evx156), 2017-08-22
Supplement: evx156_supptable_s3.xlsx [file evx156_supptable_s3.xlsx]

## Sheet: unique_genes_dcarminiucum_973
Supplementary table S3. Functional annotation of 973 unique genes from Dactylopiibacterium genome from D. coccus (NFE1).
Gen_ID	ID_uniref	Funcitonal annotation
gene_1|GeneMark.hmm|199_aa|-|1|597	UniRef100_UPI0003A97327	threonine-phosphate decarboxylase
gene_2|GeneMark.hmm|196_aa|-|581|1171	UniRef100_UPI00038015FC	cobalamin biosynthesis protein
gene_3|GeneMark.hmm|102_aa|-|1181|1489	UniRef100_UPI00038015FC	cobalamin biosynthesis protein
gene_9|GeneMark.hmm|66_aa|+|7223|7423	UniRef100_E4V5D4	Putative uncharacterized protein
gene_41|GeneMark.hmm|131_aa|+|36595|36990	UniRef100_UPI0005CE243F	PREDICTED: 5''''-nucleotidase domain-containing protein 3
gene_55|GeneMark.hmm|248_aa|+|51017|51763	UniRef100_UPI00037C47AE	hypothetical protein
gene_97|GeneMark.hmm|34_aa|-|93441|93545	UniRef100_A0A011PE60	Uncharacterized protein
gene_1593|GeneMark.hmm|29_aa|-|57543|57632	UniRef100_A0A011PE60	Uncharacterized protein
gene_98|GeneMark.hmm|356_aa|-|93613|94683	UniRef100_X0ZSF4	Uncharacterized protein
gene_99|GeneMark.hmm|45_aa|-|94773|94910	UniRef100_A0A011PQ96	Uncharacterized protein
gene_132|GeneMark.hmm|221_aa|+|131046|131711	UniRef100_UPI000370F5EC	hypothetical protein
gene_133|GeneMark.hmm|92_aa|+|131683|131961	UniRef100_UPI000370F5EC	hypothetical protein
gene_141|GeneMark.hmm|89_aa|-|137313|137582	UniRef100_UPI000378E40C	hypothetical protein
gene_142|GeneMark.hmm|108_aa|-|1084|1410	UniRef100_UPI000417A59E	transcriptional regulator
gene_145|GeneMark.hmm|351_aa|+|3024|4079	UniRef100_A0A0Q8XFZ9	N-acetyl-gamma-glutamyl-phosphate reductase
gene_150|GeneMark.hmm|362_aa|-|7657|8745	UniRef100_UPI00067B3C3D	nitrate ABC transporter substrate-binding protein
gene_161|GeneMark.hmm|257_aa|-|19592|20365	UniRef100_UPI0005EFAB60	MULTISPECIES: 3-ketoacyl-ACP synthase
gene_1331|GeneMark.hmm|258_aa|+|19544|20320	UniRef100_H0A389	Oxidoreductase, short chain dehydrogenase/reductase family protein
gene_1773|GeneMark.hmm|258_aa|-|53043|53819	UniRef100_G7ZEG4	Putative Short-chain acyl carrier reductase
gene_162|GeneMark.hmm|736_aa|-|20457|22667	UniRef100_UPI0003B517FF	chondroitin AC lyase
gene_163|GeneMark.hmm|710_aa|-|22630|24762	UniRef100_A0A0B9GYX4	Chondroitin lyase
gene_164|GeneMark.hmm|516_aa|-|24870|26420	UniRef100_Q9KWT6	AlgQ1
gene_169|GeneMark.hmm|375_aa|+|31045|32172	UniRef100_Q9KWU1	Alginate lyase
gene_171|GeneMark.hmm|40_aa|+|33611|33733	UniRef100_D9TSK4	MATE efflux family protein
gene_175|GeneMark.hmm|559_aa|-|34765|36444	UniRef100_UPI000645CC68	hypothetical protein
gene_176|GeneMark.hmm|541_aa|-|36594|38219	UniRef100_J3DH73	Putative permease
gene_177|GeneMark.hmm|79_aa|-|38180|38419	UniRef100_J3DH73	Putative permease
gene_184|GeneMark.hmm|709_aa|+|42587|44716	UniRef100_UPI000676A215	hypothetical protein
gene_185|GeneMark.hmm|124_aa|-|44734|45108	UniRef100_UPI0002DA865B	MULTISPECIES: hypothetical protein
gene_186|GeneMark.hmm|148_aa|-|45279|45725	UniRef100_UPI000681FCED	GNAT family N-acetyltransferase
gene_189|GeneMark.hmm|195_aa|+|46636|47223	UniRef100_C4LCP4	Uncharacterized protein
gene_190|GeneMark.hmm|151_aa|-|47277|47732	UniRef100_UPI000566F908	hypothetical protein
gene_191|GeneMark.hmm|250_aa|-|47732|48484	UniRef100_S9ZHF3	Uncharacterized protein n=2
gene_195|GeneMark.hmm|372_aa|+|51370|52488	UniRef100_UPI000688BDCB	hemin receptor
gene_196|GeneMark.hmm|100_aa|+|52519|52821	UniRef100_UPI000688BDCB	hemin receptor
gene_201|GeneMark.hmm|382_aa|-|59383|60531	UniRef100_UPI0004875768	integrase
gene_202|GeneMark.hmm|128_aa|-|60555|60941	UniRef100_K0HWM4	Uncharacterized protein
gene_203|GeneMark.hmm|73_aa|+|61010|61231	UniRef100_UPI00066A24DF	hypothetical protein
gene_204|GeneMark.hmm|103_aa|+|61228|61539	UniRef100_UPI000364D2B0	membrane protein
gene_205|GeneMark.hmm|101_aa|+|61541|61846	UniRef100_A0A0A3LBA6	Uncharacterized protein
gene_206|GeneMark.hmm|185_aa|+|61938|62495	UniRef100_UPI0005BDAA05	MULTISPECIES: phage terminase small subunit
gene_213|GeneMark.hmm|50_aa|-|74939|75091	UniRef100_A0A011MKY4	Oxygen-insensitive NAD(P)H nitroreductase
gene_217|GeneMark.hmm|411_aa|+|78883|80118	UniRef100_D5CM89	Major facilitator superfamily MFS_1
gene_218|GeneMark.hmm|96_aa|+|80166|80456	UniRef100_UPI00037CA880	3-oxoacyl-ACP synthase
gene_223|GeneMark.hmm|229_aa|-|84385|85074	UniRef100_C1FHU9	Uncharacterized protein
gene_229|GeneMark.hmm|75_aa|-|90753|90980	UniRef100_A0A096FDA5	Uncharacterized protein n=2
gene_248|GeneMark.hmm|160_aa|+|111976|112458	UniRef100_UPI00041DA246	hypothetical protein
gene_252|GeneMark.hmm|532_aa|-|115747|117345	UniRef100_UPI000699EA7F	glucan biosynthesis protein D
gene_253|GeneMark.hmm|360_aa|+|117729|118811	UniRef100_H0BVI0	Membrane protein
gene_260|GeneMark.hmm|68_aa|-|122664|122870	UniRef100_UPI0004841A6A	transcriptional regulator
gene_261|GeneMark.hmm|118_aa|-|122944|123300	UniRef100_UPI000485100E	transcriptional regulator
gene_263|GeneMark.hmm|74_aa|-|124252|124476	UniRef100_UPI0004F44F8D	hypothetical protein DQ04_05641010
gene_265|GeneMark.hmm|413_aa|-|125555|126796	UniRef100_A0A0M0FW80	Sodium:solute symporter
gene_276|GeneMark.hmm|53_aa|-|47|208	UniRef100_G8TWJ1	Uncharacterized protein n=2
gene_279|GeneMark.hmm|104_aa|+|1919|2233	UniRef100_UPI00036655A1	hypothetical protein
gene_280|GeneMark.hmm|99_aa|+|2666|2965	UniRef100_UPI00037792E8	hypothetical protein
gene_284|GeneMark.hmm|46_aa|-|6271|6411	UniRef100_G8ALV0	Uncharacterized protein
gene_293|GeneMark.hmm|78_aa|+|12471|12707	UniRef100_UPI0005B3042C	membrane protein
gene_304|GeneMark.hmm|335_aa|-|20042|21049	UniRef100_A0A0M4TXK4	Uncharacterized protein
gene_305|GeneMark.hmm|1008_aa|-|21295|24321	UniRef100_UPI00035F1370	hypothetical protein
gene_306|GeneMark.hmm|282_aa|-|24443|25291	UniRef100_B3PFC6	Pectate lyase, putative, pel1D
gene_310|GeneMark.hmm|36_aa|+|28448|28558	UniRef100_C5E0L3	ZYRO0G13684p
gene_314|GeneMark.hmm|78_aa|-|30852|31088	UniRef100_G9PY01	Uncharacterized protein
gene_315|GeneMark.hmm|455_aa|+|31151|32518	UniRef100_UPI0003807CFE	hypothetical protein
gene_322|GeneMark.hmm|457_aa|-|36932|38305	UniRef100_UPI0002E54465	hypothetical protein
gene_323|GeneMark.hmm|61_aa|-|38345|38530	UniRef100_K7MR64	Uncharacterized protein
gene_325|GeneMark.hmm|297_aa|-|41013|41906	UniRef100_A0A0F0FXF9	Cytochrome C biogenesis protein
gene_326|GeneMark.hmm|320_aa|-|41810|42772	UniRef100_UPI000375DB5E	hypothetical protein
gene_327|GeneMark.hmm|209_aa|-|42798|43427	UniRef100_B3EHA9	Methyltransferase type 11
gene_328|GeneMark.hmm|287_aa|-|43445|44308	UniRef100_A0A0E3Z1F6	Membrane protein
gene_330|GeneMark.hmm|210_aa|+|45852|46484	UniRef100_UPI00071E4D92	phosphomethylpyrimidine kinase
gene_332|GeneMark.hmm|1128_aa|-|48645|52031	UniRef100_Q47B52	VCBS protein
gene_332|GeneMark.hmm|1128_aa|-|48645|52031	UniRef100_Q47B52	VCBS protein
gene_332|GeneMark.hmm|1128_aa|-|48645|52031	UniRef100_Q47B52	VCBS protein
gene_332|GeneMark.hmm|1128_aa|-|48645|52031	UniRef100_Q47B52	VCBS protein
gene_333|GeneMark.hmm|444_aa|-|52113|53447	UniRef100_UPI000694FB7B	hypothetical protein
gene_333|GeneMark.hmm|444_aa|-|52113|53447	UniRef100_UPI000694FB7B	hypothetical protein
gene_333|GeneMark.hmm|444_aa|-|52113|53447	UniRef100_UPI000694FB7B	hypothetical protein
gene_333|GeneMark.hmm|444_aa|-|52113|53447	UniRef100_UPI000694FB7B	hypothetical protein
gene_333|GeneMark.hmm|444_aa|-|52113|53447	UniRef100_UPI000694FB7B	hypothetical protein
gene_333|GeneMark.hmm|444_aa|-|52113|53447	UniRef100_UPI000694FB7B	hypothetical protein
gene_333|GeneMark.hmm|444_aa|-|52113|53447	UniRef100_UPI000694FB7B	hypothetical protein
gene_333|GeneMark.hmm|444_aa|-|52113|53447	UniRef100_UPI000694FB7B	hypothetical protein
gene_334|GeneMark.hmm|123_aa|-|53730|54101	UniRef100_UPI0002DA59B8	MULTISPECIES: DNA-binding protein
gene_336|GeneMark.hmm|140_aa|-|54744|55166	UniRef100_UPI0004DF5D24	hypothetical protein
gene_338|GeneMark.hmm|177_aa|-|55876|56409	UniRef100_G2ZPZ1	Uncharacterized protein
gene_339|GeneMark.hmm|85_aa|-|56412|56669	UniRef100_A0A0F9R845	Uncharacterized protein (Fragment)
gene_340|GeneMark.hmm|101_aa|-|56669|56974	UniRef100_UPI0006C8882D	hypothetical protein
gene_341|GeneMark.hmm|87_aa|-|57109|57372	UniRef100_A0A0Q5UVD9	Uncharacterized protein
gene_343|GeneMark.hmm|241_aa|-|57699|58424	UniRef100_N7A2U5	Uncharacterized protein
gene_344|GeneMark.hmm|448_aa|+|58369|59715	UniRef100_B8LA93	Portal protein
gene_346|GeneMark.hmm|418_aa|+|61285|62541	UniRef100_W6RKP4	Virion morphogenesis protein n=2
gene_351|GeneMark.hmm|117_aa|+|65974|66327	UniRef100_A0A0H4KU26	Uncharacterized protein
gene_353|GeneMark.hmm|157_aa|+|66824|67297	UniRef100_D4TAH6	Uncharacterized protein
gene_354|GeneMark.hmm|63_aa|+|67294|67485	UniRef100_UPI00056148A6	MULTISPECIES: hypothetical protein
gene_355|GeneMark.hmm|250_aa|+|67482|68234	UniRef100_UPI0003093977	hypothetical protein
gene_356|GeneMark.hmm|171_aa|+|68237|68752	UniRef100_W6QZY3	Uncharacterized protein n=2
gene_357|GeneMark.hmm|43_aa|+|68749|68880	UniRef100_A0A075CFA7	Uncharacterized protein n=9
gene_358|GeneMark.hmm|826_aa|+|69040|71520	UniRef100_A0A0U1PYE0	Uncharacterized protein
gene_359|GeneMark.hmm|392_aa|+|71523|72701	UniRef100_D4TAH2	Uncharacterized protein
gene_360|GeneMark.hmm|430_aa|+|72694|73986	UniRef100_Q3RC33	Uncharacterized protein
gene_361|GeneMark.hmm|137_aa|+|73977|74390	UniRef100_V8L7W1	Uncharacterized protein n=2
gene_363|GeneMark.hmm|1093_aa|+|74627|77908	UniRef100_D4TAG9	Uncharacterized protein
gene_364|GeneMark.hmm|144_aa|+|77902|78336	UniRef100_UPI000467C1E8	hypothetical protein
gene_365|GeneMark.hmm|52_aa|-|78543|78701	UniRef100_UPI000555274B	hypothetical protein
gene_367|GeneMark.hmm|290_aa|-|79616|80488	UniRef100_UPI0006882E21	hypothetical protein, partial
gene_372|GeneMark.hmm|154_aa|+|85589|86053	UniRef100_UPI0005D39F45	hypothetical protein
gene_376|GeneMark.hmm|150_aa|-|90858|91310	UniRef100_A0A091B379	Uncharacterized protein
gene_380|GeneMark.hmm|445_aa|-|96588|97925	UniRef100_UPI000681868F	hypothetical protein
gene_386|GeneMark.hmm|106_aa|-|103244|103564	UniRef100_A0A0B3BR09	Uncharacterized protein n=2
gene_389|GeneMark.hmm|167_aa|+|106124|106627	UniRef100_UPI0003658561	hypothetical protein
gene_389|GeneMark.hmm|167_aa|+|106124|106627	UniRef100_UPI0003658561	hypothetical protein
gene_396|GeneMark.hmm|757_aa|+|114884|117157	UniRef100_F4KQM4	Uncharacterized protein
gene_396|GeneMark.hmm|757_aa|+|114884|117157	UniRef100_F4KQM4	Uncharacterized protein
gene_400|GeneMark.hmm|130_aa|+|79|471	UniRef100_UPI00037071D4	hypothetical protein
gene_403|GeneMark.hmm|111_aa|-|1691|2026	UniRef100_A0A010ZWW3	Uncharacterized protein
gene_404|GeneMark.hmm|146_aa|+|2046|2486	UniRef100_H0PZI9	Aldose 1-epimerase
gene_411|GeneMark.hmm|256_aa|-|8337|9107	UniRef100_UPI00036FFB30	2,3-dihydro-2,3-dihydroxybenzoate dehydrogenase
gene_412|GeneMark.hmm|211_aa|-|9145|9780	UniRef100_UPI00061A98D9	hypothetical protein
gene_414|GeneMark.hmm|385_aa|-|11438|12595	UniRef100_UPI00061B3A16	isochorismate synthase
gene_415|GeneMark.hmm|488_aa|+|12969|14435	UniRef100_UPI00056ACF69	ATP-binding protein
gene_416|GeneMark.hmm|403_aa|+|14908|16119	UniRef100_A0A0S9LY28	MFS transporter
gene_417|GeneMark.hmm|86_aa|+|16116|16376	UniRef100_A0A0S9LXV3	Phosphopantetheine-binding protein
gene_429|GeneMark.hmm|182_aa|+|38418|38966	UniRef100_E4TRV5	Uncharacterized protein
gene_431|GeneMark.hmm|466_aa|-|41753|43153	UniRef100_UPI000641E647	peptidase M24
gene_1073|GeneMark.hmm|606_aa|+|1060686|1062506	UniRef100_E5AQ02	Xaa-Pro aminopeptidase (EC 3.4.11.9) n=2
gene_435|GeneMark.hmm|100_aa|-|44826|45128	UniRef100_A0A0R2ZDK4	Protein TonB
gene_437|GeneMark.hmm|307_aa|-|45839|46762	UniRef100_UPI00068F1C7D	hypothetical protein
gene_440|GeneMark.hmm|447_aa|+|49610|50953	UniRef100_A0A0G4K2M8	TldE protein, part of TldE/TldD proteolytic complex
gene_442|GeneMark.hmm|218_aa|-|52646|53302	UniRef100_A0A0B1XVR9	Pyrrolidone-carboxylate peptidase
gene_2594|GeneMark.hmm|253_aa|+|2657902|2658663	UniRef100_E5AMS2	Pyrrolidone-carboxylate peptidase n=2
gene_447|GeneMark.hmm|486_aa|-|56980|58440	UniRef100_UPI0002FD6521	hypothetical protein
gene_448|GeneMark.hmm|353_aa|-|58322|59383	UniRef100_A0A0K8P141	Ferrichrome-iron receptor
gene_451|GeneMark.hmm|186_aa|+|61305|61865	UniRef100_UPI0004916141	threonine aldolase
gene_452|GeneMark.hmm|175_aa|+|61820|62347	UniRef100_A0A0N0GLA4	L-threonine aldolase
gene_453|GeneMark.hmm|737_aa|-|62400|64613	UniRef100_B3C6J1	Peptidase, S9A/B/C family, catalytic domain protein
gene_471|GeneMark.hmm|104_aa|+|84275|84589	UniRef100_UPI0004901A92	phosphohistidine phosphatase
gene_474|GeneMark.hmm|224_aa|-|86600|87274	UniRef100_UPI00037F2627	hypothetical protein
gene_483|GeneMark.hmm|212_aa|-|99792|100430	UniRef100_A0A0D5XVI2	Hydrolase
gene_484|GeneMark.hmm|95_aa|-|34|321	UniRef100_UPI00037D9E8C	molybdenum ABC transporter permease
gene_502|GeneMark.hmm|77_aa|+|13530|13763	UniRef100_Q3B569	Chlorosome envelope protein X
gene_505|GeneMark.hmm|386_aa|-|15333|16493	UniRef100_A0A0H1AQE1	Nitrite reductase
gene_506|GeneMark.hmm|153_aa|-|16631|17092	UniRef100_A0A0H1AP79	Electron transfer flavoprotein
gene_530|GeneMark.hmm|309_aa|+|47380|48309	UniRef100_A3CUM3	Radical SAM domain protein
gene_532|GeneMark.hmm|444_aa|+|51205|52539	UniRef100_A0A0C1FJS1	Glycoside hydrolase family protein
gene_539|GeneMark.hmm|670_aa|+|61069|63081	UniRef100_UPI000370A25D	hypothetical protein
gene_543|GeneMark.hmm|436_aa|+|67379|68689	UniRef100_I8TSV6	Polygalacturonase
gene_544|GeneMark.hmm|226_aa|-|68761|69441	UniRef100_UPI0004BC83DD	hypothetical protein
gene_547|GeneMark.hmm|88_aa|-|71968|72234	UniRef100_D5X479	Uncharacterized protein
gene_549|GeneMark.hmm|154_aa|-|73351|73815	UniRef100_UPI000695B67F	hypothetical protein
gene_550|GeneMark.hmm|356_aa|-|74014|75084	UniRef100_UPI00035F93B8	hypothetical protein
gene_554|GeneMark.hmm|368_aa|-|79082|80188	UniRef100_UPI00037636C4	hypothetical protein
gene_557|GeneMark.hmm|298_aa|-|81862|82758	UniRef100_UPI000372B242	hypothetical protein
gene_558|GeneMark.hmm|40_aa|-|82755|82877	UniRef100_A1K253	Uncharacterized protein
gene_559|GeneMark.hmm|233_aa|-|82877|83578	UniRef100_UPI00036AE9DE	hypothetical protein
gene_562|GeneMark.hmm|184_aa|-|85570|86124	UniRef100_A0A061YSR9	Uncharacterized protein n=3
gene_563|GeneMark.hmm|267_aa|-|86287|87090	UniRef100_UPI0003761A0B	hypothetical protein
gene_569|GeneMark.hmm|65_aa|-|93097|93294	UniRef100_UPI0005EB8A06	hypothetical protein
gene_572|GeneMark.hmm|117_aa|-|97434|97787	UniRef100_UPI00036513B5	hypothetical protein
gene_575|GeneMark.hmm|324_aa|+|1394|2368	UniRef100_UPI0003785A8C	hybrid sensor histidine kinase/response regulator
gene_575|GeneMark.hmm|324_aa|+|1394|2368	UniRef100_UPI0003785A8C	hybrid sensor histidine kinase/response regulator
gene_575|GeneMark.hmm|324_aa|+|1394|2368	UniRef100_UPI0003785A8C	hybrid sensor histidine kinase/response regulator
gene_582|GeneMark.hmm|135_aa|-|10367|10774	UniRef100_UPI00061821EA	murein hydrolase regulator LrgA
gene_590|GeneMark.hmm|277_aa|+|16412|17245	UniRef100_UPI00036FFFDC	two-component sensor histidine kinase
gene_609|GeneMark.hmm|405_aa|-|37589|38806	UniRef100_UPI00036A37A6	hypothetical protein
gene_612|GeneMark.hmm|64_aa|-|39919|40113	UniRef100_A0A0F6W8W8	Tryptophan synthase alpha chain
gene_613|GeneMark.hmm|135_aa|+|40115|40522	UniRef100_B8KVP5	Uncharacterized protein n=2
gene_614|GeneMark.hmm|227_aa|-|40579|41262	UniRef100_UPI00073142F5	hypothetical protein
gene_615|GeneMark.hmm|103_aa|-|41791|42102	UniRef100_UPI0006859F58	hypothetical protein
gene_616|GeneMark.hmm|89_aa|-|42123|42392	UniRef100_UPI00037F701E	hypothetical protein
gene_617|GeneMark.hmm|215_aa|-|42575|43222	UniRef100_UPI00072FBE85	MULTISPECIES: hypothetical protein
gene_619|GeneMark.hmm|88_aa|-|44297|44563	UniRef100_A5VGZ7	Uncharacterized protein
gene_641|GeneMark.hmm|248_aa|+|68296|69042	UniRef100_UPI000366C769	hypothetical protein
gene_645|GeneMark.hmm|98_aa|+|72414|72710	UniRef100_A0A080M5M3	Anti-anti-sigma factor
gene_648|GeneMark.hmm|179_aa|+|76375|76914	UniRef100_UPI000686495E	chemotaxis protein CheW
gene_653|GeneMark.hmm|421_aa|+|80661|81926	UniRef100_A0A0Q6DHA3	Uncharacterized protein n=2
gene_654|GeneMark.hmm|115_aa|+|81923|82270	UniRef100_W6W591	Esterase
gene_655|GeneMark.hmm|307_aa|+|82312|83235	UniRef100_UPI000691BAAD	iron ABC transporter substrate-binding protein
gene_656|GeneMark.hmm|320_aa|+|83241|84203	UniRef100_UPI0005649C12	iron ABC transporter permease
gene_657|GeneMark.hmm|317_aa|+|84207|85160	UniRef100_UPI000684A1DD	enterobactin ABC transporter permease
gene_660|GeneMark.hmm|1055_aa|-|87051|90218	UniRef100_A0A0E9MC83	Chemotaxis protein
gene_661|GeneMark.hmm|105_aa|-|180|497	UniRef100_UPI000469ADEB	hypothetical protein, partial
gene_661|GeneMark.hmm|105_aa|-|180|497	UniRef100_UPI000469ADEB	hypothetical protein, partial
gene_661|GeneMark.hmm|105_aa|-|180|497	UniRef100_UPI000469ADEB	hypothetical protein, partial
gene_661|GeneMark.hmm|105_aa|-|180|497	UniRef100_UPI000469ADEB	hypothetical protein, partial
gene_661|GeneMark.hmm|105_aa|-|180|497	UniRef100_UPI000469ADEB	hypothetical protein, partial
gene_661|GeneMark.hmm|105_aa|-|180|497	UniRef100_UPI000469ADEB	hypothetical protein, partial
gene_661|GeneMark.hmm|105_aa|-|180|497	UniRef100_UPI000469ADEB	hypothetical protein, partial
gene_661|GeneMark.hmm|105_aa|-|180|497	UniRef100_UPI000469ADEB	hypothetical protein, partial
gene_661|GeneMark.hmm|105_aa|-|180|497	UniRef100_UPI000469ADEB	hypothetical protein, partial
gene_661|GeneMark.hmm|105_aa|-|180|497	UniRef100_UPI000469ADEB	hypothetical protein, partial
gene_661|GeneMark.hmm|105_aa|-|180|497	UniRef100_UPI000469ADEB	hypothetical protein, partial
gene_661|GeneMark.hmm|105_aa|-|180|497	UniRef100_UPI000469ADEB	hypothetical protein, partial
gene_661|GeneMark.hmm|105_aa|-|180|497	UniRef100_UPI000469ADEB	hypothetical protein, partial
gene_661|GeneMark.hmm|105_aa|-|180|497	UniRef100_UPI000469ADEB	hypothetical protein, partial
gene_661|GeneMark.hmm|105_aa|-|180|497	UniRef100_UPI000469ADEB	hypothetical protein, partial
gene_679|GeneMark.hmm|241_aa|+|18168|18893	UniRef100_A0A0D2UVC0	C4-dicarboxylate ABC transporter
gene_680|GeneMark.hmm|63_aa|+|18948|19139	UniRef100_UPI000369E1F2	C4-dicarboxylate ABC transporter
gene_682|GeneMark.hmm|251_aa|+|19692|20447	UniRef100_Q0B2F4	TRAP dicarboxylate transporter, DctM subunit
gene_683|GeneMark.hmm|209_aa|+|20408|21037	UniRef100_A0A0D2W2I0	C4-dicarboxylate ABC transporter permease
gene_684|GeneMark.hmm|415_aa|+|21093|22340	UniRef100_UPI000569F413	hypothetical protein
gene_685|GeneMark.hmm|502_aa|+|22385|23893	UniRef100_UPI0004B81B0C	D-mannonate oxidoreductase
gene_696|GeneMark.hmm|145_aa|+|32950|33387	UniRef100_N6ZAI1	Uncharacterized protein
gene_706|GeneMark.hmm|69_aa|+|41178|41387	UniRef100_A0A0P4WGQ7	Uncharacterized protein
gene_710|GeneMark.hmm|112_aa|-|44296|44634	UniRef100_UPI0006910717	molybdopterin biosynthesis protein MoeE
gene_711|GeneMark.hmm|82_aa|-|44637|44885	UniRef100_D5CNX1	ThiamineS protein
gene_715|GeneMark.hmm|289_aa|-|47383|48252	UniRef100_UPI00040090DB	ethanolamine ammonia-lyase
gene_716|GeneMark.hmm|185_aa|-|48221|48778	UniRef100_UPI0004689021	ethanolamine ammonia-lyase
gene_726|GeneMark.hmm|291_aa|+|61058|61933	UniRef100_UPI0005274F30	MFS transporter
gene_727|GeneMark.hmm|191_aa|+|61870|62445	UniRef100_UPI0005274F30	MFS transporter
gene_729|GeneMark.hmm|58_aa|+|63481|63657	UniRef100_UPI000477B6F8	ABC transporter substrate-binding protein
gene_737|GeneMark.hmm|186_aa|-|72665|73225	UniRef100_UPI0003F7D15D	hypothetical protein
gene_740|GeneMark.hmm|94_aa|+|74981|75265	UniRef100_V2XM90	ABC transporter, solute-binding protein
gene_743|GeneMark.hmm|482_aa|+|78990|80438	UniRef100_UPI000378314D	hypothetical protein
gene_753|GeneMark.hmm|199_aa|-|1|597	UniRef100_D8NGK6	Phage protein
gene_754|GeneMark.hmm|67_aa|+|596|799	UniRef100_A0A0S2DG89	Uncharacterized protein
gene_755|GeneMark.hmm|102_aa|-|832|1140	UniRef100_UPI0004DF6BB7	hypothetical protein
gene_758|GeneMark.hmm|107_aa|-|2149|2472	UniRef100_A5WF24	Uncharacterized protein
gene_759|GeneMark.hmm|135_aa|-|2472|2879	UniRef100_A0A0L9VDC7	Uncharacterized protein n=2
gene_762|GeneMark.hmm|446_aa|+|3493|4833	UniRef100_UPI000413F1CA	sulfate transporter
gene_766|GeneMark.hmm|449_aa|+|5866|7215	UniRef100_A0A0P9RU35	Phage-related tail fiber protein-like protein
gene_766|GeneMark.hmm|449_aa|+|5866|7215	UniRef100_A0A0P9RU35	Phage-related tail fiber protein-like protein
gene_766|GeneMark.hmm|449_aa|+|5866|7215	UniRef100_A0A0P9RU35	Phage-related tail fiber protein-like protein
gene_767|GeneMark.hmm|190_aa|+|7225|7797	UniRef100_A0A0M9B2X3	Uncharacterized protein n=2
gene_768|GeneMark.hmm|37_aa|+|8027|8140	UniRef100_UPI0004761750	restriction endonuclease subunit M
gene_770|GeneMark.hmm|106_aa|-|8511|8831	UniRef100_UPI0006BB5446	amino acid permease
gene_773|GeneMark.hmm|330_aa|-|10389|11381	UniRef100_F7YYQ2	Extracellular solute-binding protein, family 7
gene_774|GeneMark.hmm|94_aa|-|11541|11825	UniRef100_A0A0U1QC90	C4-dicarboxylate ABC transporter
gene_775|GeneMark.hmm|196_aa|-|11868|12458	UniRef100_F3KPX7	TRAP dicarboxylate transporter subunit DctP
gene_777|GeneMark.hmm|62_aa|+|13654|13842	UniRef100_A0A0C9TY44	Unplaced genomic scaffold PAXINscaffold_40, whole genome shotgun sequence
gene_782|GeneMark.hmm|216_aa|+|16256|16906	UniRef100_A0A0S9MWW3	Methyltransferase
gene_786|GeneMark.hmm|190_aa|+|19853|20425	UniRef100_UPI000686F73F	cytochrome c biogenesis protein
gene_791|GeneMark.hmm|124_aa|-|23751|24125	UniRef100_UPI0006413020	RNA pseudouridine synthase
gene_792|GeneMark.hmm|113_aa|-|24138|24479	UniRef100_UPI000375DD66	RNA pseudouridine synthase
gene_799|GeneMark.hmm|175_aa|+|30592|31119	UniRef100_UPI00036D98FE	hypothetical protein
gene_800|GeneMark.hmm|136_aa|-|31144|31554	UniRef100_S6JL44	Putative periplasmic protein n=2
gene_801|GeneMark.hmm|39_aa|-|31622|31741	UniRef100_U6ZYB2	Uncharacterized protein
gene_803|GeneMark.hmm|417_aa|-|32121|33374	UniRef100_UPI000550015E	hypothetical protein
gene_812|GeneMark.hmm|447_aa|-|45026|46369	UniRef100_W6MAV8	Uncharacterized protein n=2
gene_818|GeneMark.hmm|226_aa|+|52572|53252	UniRef100_A0A0Q7CK13	Urea ABC transporter permease subunit UrtC
gene_819|GeneMark.hmm|126_aa|+|53277|53657	UniRef100_UPI000582F9C1	amino acid ABC transporter permease
gene_836|GeneMark.hmm|128_aa|+|68350|68736	UniRef100_UPI0007165F59	hypothetical protein
gene_837|GeneMark.hmm|112_aa|+|68800|69138	UniRef100_UPI00037A5AE9	hypothetical protein
gene_842|GeneMark.hmm|65_aa|+|75779|75976	UniRef100_C4K947	Uncharacterized protein
gene_856|GeneMark.hmm|93_aa|+|1267|1548	UniRef100_A0A0B4XQ42	Uncharacterized protein
gene_868|GeneMark.hmm|132_aa|-|12721|13119	UniRef100_B5JY13	Histidine--tRNA ligase
gene_869|GeneMark.hmm|231_aa|-|13116|13811	UniRef100_N6YDC0	Uncharacterized protein
gene_870|GeneMark.hmm|65_aa|-|14725|14922	UniRef100_UPI00034AB6C6	phage coat protein
gene_872|GeneMark.hmm|110_aa|-|15158|15490	UniRef100_A0A0U0WTF2	Uncharacterised protein n=2
gene_873|GeneMark.hmm|223_aa|-|15856|16527	UniRef100_UPI0006800A48	hypothetical protein
gene_879|GeneMark.hmm|245_aa|-|23911|24648	UniRef100_UPI00048411FB	zinc transporter ZupT
gene_886|GeneMark.hmm|181_aa|+|29855|30400	UniRef100_UPI00067B7207	PadR family transcriptional regulator
gene_888|GeneMark.hmm|110_aa|+|31024|31356	UniRef100_UPI00034DBAAF	hypothetical protein
gene_889|GeneMark.hmm|172_aa|-|31394|31912	UniRef100_UPI0005C13ED8	polyketide cyclase
gene_890|GeneMark.hmm|296_aa|-|32079|32969	UniRef100_C1DS62	LysR family transcriptional regulator protein n=2
gene_896|GeneMark.hmm|201_aa|+|37630|38235	UniRef100_UPI000410CA36	hypothetical protein
gene_897|GeneMark.hmm|124_aa|+|38239|38613	UniRef100_UPI000410CA36	hypothetical protein
gene_899|GeneMark.hmm|301_aa|+|39188|40093	UniRef100_UPI000368BF00	hypothetical protein
gene_922|GeneMark.hmm|228_aa|+|66579|67265	UniRef100_Q17WD8	Putative restriction endonuclease
gene_926|GeneMark.hmm|211_aa|+|69785|70420	UniRef100_A0A0Q4PJM7	PEP-CTERM domain protein
gene_929|GeneMark.hmm|512_aa|-|73996|75534	UniRef100_UPI0006CE93B0	phosphoenolpyruvate synthase
gene_930|GeneMark.hmm|297_aa|-|75470|76363	UniRef100_UPI00040CD9E9	phosphoenolpyruvate synthase
gene_934|GeneMark.hmm|43_aa|-|79100|79231	UniRef100_A0A096SVA3	Uncharacterized protein
gene_935|GeneMark.hmm|137_aa|-|79239|79652	UniRef100_M3APR9	Uncharacterized protein
gene_936|GeneMark.hmm|63_aa|+|79733|79924	UniRef100_U6ZHG5	Permease, Putative integral membrane protein
gene_938|GeneMark.hmm|41_aa|+|80460|80585	UniRef100_UPI0005512528	GNAT family N-acetyltransferase
gene_940|GeneMark.hmm|254_aa|-|53|817	UniRef100_UPI000369ADBE	homoserine O-acetyltransferase
gene_2633|GeneMark.hmm|271_aa|+|2697920|2698735	UniRef100_E5AN95	Homoserine O-acetyltransferase
gene_945|GeneMark.hmm|214_aa|-|4654|5298	UniRef100_A0A0Q5E706	Zn-dependent protease
gene_953|GeneMark.hmm|352_aa|+|13368|14426	UniRef100_UPI00056C66C6	hypothetical protein
gene_967|GeneMark.hmm|376_aa|-|25182|26312	UniRef100_UPI00040CEBDA	ABC transporter permease
gene_968|GeneMark.hmm|422_aa|-|26299|27567	UniRef100_UPI00057F1B64	ABC transporter permease
gene_969|GeneMark.hmm|465_aa|-|27564|28961	UniRef100_UPI0005DC9750	hypothetical protein
gene_971|GeneMark.hmm|643_aa|-|29604|31535	UniRef100_UPI00048D3922	iron permease
gene_972|GeneMark.hmm|249_aa|-|31725|32474	UniRef100_B9Z737	Uncharacterized protein
gene_983|GeneMark.hmm|200_aa|-|44721|45323	UniRef100_D5EC50	ThiJ/PfpI domain protein
gene_985|GeneMark.hmm|281_aa|-|46394|47239	UniRef100_L1NY45	Transcriptional regulator, effector binding domain protein
gene_1539|GeneMark.hmm|248_aa|-|56895|57641	UniRef100_UPI00035CF289	hypothetical protein
gene_3304|GeneMark.hmm|278_aa|-|10079|10915	UniRef100_A0A0F3IWD2	Uncharacterized protein
gene_994|GeneMark.hmm|224_aa|+|56450|57124	UniRef100_A0A0G2ZTX4	Peptidyl-prolyl cis-trans isomerase
gene_995|GeneMark.hmm|253_aa|+|57306|58067	UniRef100_UPI00035FF2E0	hypothetical protein
gene_995|GeneMark.hmm|253_aa|+|57306|58067	UniRef100_UPI00035FF2E0	hypothetical protein
gene_995|GeneMark.hmm|253_aa|+|57306|58067	UniRef100_UPI00035FF2E0	hypothetical protein
gene_995|GeneMark.hmm|253_aa|+|57306|58067	UniRef100_UPI00035FF2E0	hypothetical protein
gene_996|GeneMark.hmm|574_aa|+|58049|59773	UniRef100_UPI00035FF2E0	hypothetical protein
gene_996|GeneMark.hmm|574_aa|+|58049|59773	UniRef100_UPI00035FF2E0	hypothetical protein
gene_996|GeneMark.hmm|574_aa|+|58049|59773	UniRef100_UPI00035FF2E0	hypothetical protein
gene_1008|GeneMark.hmm|121_aa|+|71965|72330	UniRef100_I3CP34	D-alanyl-D-alanine carboxypeptidase (Penicillin-binding) transmembrane protein
gene_1009|GeneMark.hmm|282_aa|+|72303|73151	UniRef100_UPI00036EAECF	hypothetical protein
gene_1019|GeneMark.hmm|151_aa|+|2664|3119	UniRef100_F2F1Q5	Predicted thioesterase
gene_1021|GeneMark.hmm|311_aa|+|3928|4863	UniRef100_C4LFJ3	Lactate/malate dehydrogenase
gene_1022|GeneMark.hmm|146_aa|-|4870|5310	UniRef100_UPI00047739F9	potassium transporter Kup
gene_1023|GeneMark.hmm|164_aa|-|5416|5910	UniRef100_UPI00047739F9	potassium transporter Kup
gene_1024|GeneMark.hmm|56_aa|-|5973|6143	UniRef100_W6LUN0	Response regulator in two-component regulatory system with KdpD, regulation of potassium translocation (OmpR family) n=2
gene_1025|GeneMark.hmm|167_aa|-|6150|6653	UniRef100_UPI000360E2B6	DNA-binding response regulator
gene_1030|GeneMark.hmm|208_aa|+|11565|12191	UniRef100_UPI000486FDBC	alcohol dehydrogenase
gene_1031|GeneMark.hmm|108_aa|+|12210|12536	UniRef100_A0A069PK35	Alcohol dehydrogenase
gene_1039|GeneMark.hmm|220_aa|-|19275|19937	UniRef100_UPI00053D9A81	membrane protein
gene_1043|GeneMark.hmm|34_aa|+|22792|22896	UniRef100_G0MSW0	CBN-LITE-1 protein
gene_1047|GeneMark.hmm|217_aa|-|23805|24458	UniRef100_UPI00037DC018	hypothetical protein
gene_1048|GeneMark.hmm|74_aa|-|24504|24728	UniRef100_UPI00058BF0F2	hypothetical protein
gene_1050|GeneMark.hmm|251_aa|-|25693|26448	UniRef100_A0A0G3BDT0	Inner membrane protein
gene_1052|GeneMark.hmm|121_aa|-|27828|28193	UniRef100_B7XH70	Flagellar protein FlgJ
gene_1053|GeneMark.hmm|369_aa|-|28194|29303	UniRef100_A0A0A8JCN7	Flagellar P-ring protein
gene_1055|GeneMark.hmm|222_aa|-|29976|30644	UniRef100_A0A0A8JBP2	Flagellar basal-body rod protein FlgG
gene_1056|GeneMark.hmm|241_aa|-|30684|31409	UniRef100_A0A0A8JEI1	Flagellar basal body protein
gene_1057|GeneMark.hmm|400_aa|-|31430|32632	UniRef100_A0A0A8JC67	Flagellar hook protein FlgE
gene_1058|GeneMark.hmm|187_aa|-|32674|33237	UniRef100_A0A0A8JCP1	Basal-body rod modification protein FlgD
gene_1059|GeneMark.hmm|139_aa|-|33326|33745	UniRef100_A0A0A8JCT2	Flagellar basal-body rod protein FlgC
gene_1060|GeneMark.hmm|132_aa|-|33747|34145	UniRef100_A0A0A8JBP7	Flagellar basal body rod protein FlgB
gene_1061|GeneMark.hmm|232_aa|+|34129|34827	UniRef100_A0A0A8JEI7	Flagellar basal body P-ring protein FlgA
gene_1062|GeneMark.hmm|242_aa|-|34815|35543	UniRef100_A0A0Q6TKF7	Flagellar biosynthesis protein FlgJ
gene_1063|GeneMark.hmm|144_aa|-|35530|35964	UniRef100_A0A0A8K9X2	Flagella synthesis protein FlgN
gene_1064|GeneMark.hmm|91_aa|-|35961|36236	UniRef100_UPI00036CF592	hypothetical protein
gene_1067|GeneMark.hmm|232_aa|-|38175|38873	UniRef100_A0A0A8JCT7	RNA polymerase sigma factor FliA
gene_1068|GeneMark.hmm|155_aa|-|38879|39346	UniRef100_UPI000615382F	hypothetical protein
gene_1069|GeneMark.hmm|396_aa|-|39343|40533	UniRef100_A0A0A8JEJ1	Flagellar hook-length control protein FliK1
gene_1070|GeneMark.hmm|102_aa|-|40530|40838	UniRef100_A0A0F7QZI6	Uncharacterized protein
gene_1071|GeneMark.hmm|131_aa|-|40831|41226	UniRef100_A0A0G3BLP6	Flagellar protein FliS
gene_1072|GeneMark.hmm|441_aa|-|41246|42571	UniRef100_A0A0S9L2H0	Lateral flagellar hook-associated protein 2
gene_1073|GeneMark.hmm|150_aa|-|42698|43150	UniRef100_A0A0A8JCU3	Flagellar FliJ protein
gene_1074|GeneMark.hmm|191_aa|-|43155|43730	UniRef100_A0A0A8JBQ7	Flagellar protein export ATPase FliI
gene_1075|GeneMark.hmm|226_aa|-|44037|44717	UniRef100_A0A0G3BQV4	Flagellar assembly protein FliH
gene_1077|GeneMark.hmm|557_aa|-|45726|47399	UniRef100_A0A0A8JCQ8	Flagellar M-ring protein
gene_1078|GeneMark.hmm|102_aa|-|47419|47727	UniRef100_A0A0A8JCU8	Flagellar hook-basal body complex protein FliE
gene_1079|GeneMark.hmm|287_aa|+|48685|49548	UniRef100_A0A0A8JBR3	Flagellar motor switch protein FliM
gene_1080|GeneMark.hmm|119_aa|+|49551|49910	UniRef100_A0A0A8JEK2	Flagellar motor switch protein FliN
gene_1081|GeneMark.hmm|245_aa|+|49907|50644	UniRef100_A0A0Q6W7F7	Flagellar biosynthetic protein FliP
gene_1082|GeneMark.hmm|90_aa|+|50664|50936	UniRef100_A0A0A8JCR3	Flagellar biosynthetic protein FliQ
gene_1083|GeneMark.hmm|256_aa|+|50948|51718	UniRef100_A0A0G3BSM0	Flagellar biosynthetic protein FliR
gene_1084|GeneMark.hmm|172_aa|+|51720|52238	UniRef100_A0A0A8JBR8	Flagellar biosynthetic protein FlhB
gene_1085|GeneMark.hmm|208_aa|+|52235|52861	UniRef100_A0A0A8JBR8	Flagellar biosynthetic protein FlhB
gene_1086|GeneMark.hmm|666_aa|+|52881|54881	UniRef100_A0A0A8JEK8	Flagellar biosynthesis protein FlhA
gene_1087|GeneMark.hmm|334_aa|-|54923|55927	UniRef100_A0A0F7R5X5	Uncharacterized protein
gene_1089|GeneMark.hmm|134_aa|-|57307|57711	UniRef100_UPI00067DC07B	hypothetical protein
gene_1090|GeneMark.hmm|115_aa|-|57745|58092	UniRef100_UPI0006D47324	hypothetical protein
gene_1094|GeneMark.hmm|484_aa|+|60837|62291	UniRef100_A0A069D0D5	Hexuronate transporter
gene_1097|GeneMark.hmm|116_aa|+|66048|66398	UniRef100_UPI0006841024	hypothetical protein
gene_1106|GeneMark.hmm|455_aa|-|75408|76775	UniRef100_UPI00037D0E70	hypothetical protein
gene_1109|GeneMark.hmm|387_aa|-|292|1455	UniRef100_J3HQR2	Amidase, hydantoinase/carbamoylase family
gene_1110|GeneMark.hmm|255_aa|-|1452|2219	UniRef100_B7WWW0	Orotate phosphoribosyltransferase n=2
gene_264|GeneMark.hmm|228_aa|-|260932|261618	UniRef100_E5ALE0	Orotate phosphoribosyltransferase
gene_1111|GeneMark.hmm|109_aa|+|2422|2751	UniRef100_A0A0Q5M251	LysR family transcriptional regulator
gene_1112|GeneMark.hmm|195_aa|+|2769|3356	UniRef100_A0A0Q4X931	LysR family transcriptional regulator n=2
gene_1113|GeneMark.hmm|145_aa|+|3385|3822	UniRef100_C5TAR0	Uncharacterized protein
gene_1118|GeneMark.hmm|166_aa|+|7376|7876	UniRef100_Q5DWP2	Alginate lyase
gene_1119|GeneMark.hmm|579_aa|+|7873|9612	UniRef100_Q5DWP2	Alginate lyase
gene_1120|GeneMark.hmm|568_aa|+|9691|11397	UniRef100_UPI0003668CA8	hypothetical protein
gene_2866|GeneMark.hmm|584_aa|-|207073|208827	UniRef100_UPI0002E8C6DA	voltage-gated chloride channel protein ClcB
gene_1136|GeneMark.hmm|333_aa|-|31429|32430	UniRef100_G8AU56	ABC transporter substrate-binding component n=2
gene_1138|GeneMark.hmm|214_aa|+|33623|34267	UniRef100_A0A0H2LP51	Acylamidase
gene_1139|GeneMark.hmm|239_aa|+|34267|34986	UniRef100_UPI0004283F60	hypothetical protein
gene_1145|GeneMark.hmm|173_aa|+|40537|41058	UniRef100_UPI0003810109	hypothetical protein
gene_1156|GeneMark.hmm|759_aa|+|49552|51831	UniRef100_UPI000647D41D	hypothetical protein
gene_1156|GeneMark.hmm|759_aa|+|49552|51831	UniRef100_UPI000647D41D	hypothetical protein
gene_1160|GeneMark.hmm|133_aa|-|53975|54376	UniRef100_UPI00061D330C	NUDIX domain-containing protein
gene_1173|GeneMark.hmm|69_aa|+|72185|72394	UniRef100_A0A059D756	Uncharacterized protein
gene_1174|GeneMark.hmm|261_aa|+|72810|73595	UniRef100_F7NJC7	Aspartate dehydrogenase
gene_1175|GeneMark.hmm|123_aa|-|73633|74004	UniRef100_UPI0003808B19	ABC transporter permease
gene_1184|GeneMark.hmm|493_aa|+|8790|10271	UniRef100_UPI0005272772	segregation and condensation protein A
gene_1186|GeneMark.hmm|418_aa|+|10916|12172	UniRef100_N6X5V4	Pseudouridine synthase
gene_1200|GeneMark.hmm|156_aa|+|26979|27449	UniRef100_UPI00036DE3BB	hypothetical protein
gene_1231|GeneMark.hmm|53_aa|+|56488|56649	UniRef100_UPI000367D13F	hypothetical protein
gene_1232|GeneMark.hmm|446_aa|-|56756|58096	UniRef100_A0A0C4WKV6	S-adenosyl-L-methionine-dependent methyltransferase
gene_1235|GeneMark.hmm|446_aa|+|61294|62634	UniRef100_R0ECY1	Sensor histidine kinase
gene_1240|GeneMark.hmm|83_aa|-|68230|68481	UniRef100_A0A0A0DP63	Uncharacterized protein
gene_1245|GeneMark.hmm|147_aa|-|34|477	UniRef100_UPI0003808B19	ABC transporter permease
gene_1252|GeneMark.hmm|143_aa|+|6604|7035	UniRef100_D4DNE3	META domain protein
gene_1253|GeneMark.hmm|936_aa|-|7045|9855	UniRef100_S6B1F2	Diguanylate cyclase/phosphodiesterase with PAS/PAC sensor(S)
gene_1265|GeneMark.hmm|523_aa|-|22839|24410	UniRef100_UPI0005A84B69	hypothetical protein
gene_1267|GeneMark.hmm|73_aa|+|25485|25706	UniRef100_UPI0004A3013B	hypothetical protein
gene_1271|GeneMark.hmm|72_aa|-|28849|29067	UniRef100_UPI00035E4CC6	hypothetical protein
gene_1272|GeneMark.hmm|91_aa|-|29064|29339	UniRef100_Q47ET2	Nucleoside 2-deoxyribosyltransferase
gene_1274|GeneMark.hmm|71_aa|+|30336|30551	UniRef100_A0A0D7KAL3	Uncharacterized protein
gene_1275|GeneMark.hmm|47_aa|+|30601|30744	UniRef100_UPI00035E3113	hypothetical protein
gene_1283|GeneMark.hmm|141_aa|+|37258|37683	UniRef100_A0A0T6UKZ3	Sulfate/thiosulfate transporter permease subunit
gene_1284|GeneMark.hmm|138_aa|+|37683|38099	UniRef100_UPI000565FE47	MULTISPECIES: sulfate/thiosulfate transporter permease subunit
gene_1293|GeneMark.hmm|221_aa|-|44807|45472	UniRef100_UPI00037309BC	hypothetical protein
gene_1302|GeneMark.hmm|75_aa|+|55040|55267	UniRef100_UPI0003821017	hypothetical protein
gene_1305|GeneMark.hmm|407_aa|-|58281|59504	UniRef100_A0A0C5J289	Uncharacterized protein
gene_1313|GeneMark.hmm|462_aa|-|576|1964	UniRef100_W6M4K0	Soluble pyridine nucleotide transhydrogenase
gene_1332|GeneMark.hmm|106_aa|-|20327|20647	UniRef100_A0A0Q6X8D2	Uncharacterized protein
gene_1337|GeneMark.hmm|54_aa|+|26234|26398	UniRef100_A0A011QUD3	Glutamate/aspartate periplasmic-binding protein
gene_1338|GeneMark.hmm|54_aa|-|26462|26626	UniRef100_A0A0S8K3M5	Uncharacterized protein n=2
gene_1339|GeneMark.hmm|170_aa|+|26660|27172	UniRef100_UPI00036EEAD1	hypothetical protein
gene_1361|GeneMark.hmm|596_aa|+|49080|50870	UniRef100_UPI00035F3ABD	hypothetical protein
gene_1371|GeneMark.hmm|232_aa|+|59905|60603	UniRef100_A0A0C3N434	Uncharacterized protein n=3
gene_1387|GeneMark.hmm|205_aa|+|10550|11167	UniRef100_UPI0003644040	8-amino-7-oxononanoate synthase
gene_1388|GeneMark.hmm|156_aa|+|11264|11734	UniRef100_UPI0003FBD45C	8-amino-7-oxononanoate synthase
gene_1405|GeneMark.hmm|808_aa|+|32065|34491	UniRef100_UPI0003F586D3	PAS domain-containing sensor histidine kinase
gene_1418|GeneMark.hmm|175_aa|+|51062|51589	UniRef100_UPI00040EBB97	arsenate reductase
gene_1421|GeneMark.hmm|94_aa|-|54845|55129	UniRef100_UPI000370683F	hypothetical protein
gene_1423|GeneMark.hmm|245_aa|-|56061|56798	UniRef100_UPI000647A1C8	EtfB protein
gene_1444|GeneMark.hmm|49_aa|-|16992|17141	UniRef100_A0A095F0Z1	Amidohydrolase family protein n=2
gene_1449|GeneMark.hmm|267_aa|-|21023|21826	UniRef100_UPI00059430DD	peptide ABC transporter ATP-binding protein
gene_1464|GeneMark.hmm|364_aa|-|38767|39861	UniRef100_UPI00068D8F91	hypothetical protein
gene_1465|GeneMark.hmm|283_aa|-|39842|40693	UniRef100_UPI00048DEEB5	hypothetical protein
gene_1480|GeneMark.hmm|282_aa|+|53312|54160	UniRef100_UPI0003F4BE32	hypothetical protein
gene_1481|GeneMark.hmm|215_aa|+|54186|54833	UniRef100_UPI0003666619	hypothetical protein
gene_1482|GeneMark.hmm|292_aa|+|54830|55708	UniRef100_UPI00036F9CAC	hypothetical protein
gene_1483|GeneMark.hmm|156_aa|-|55857|56327	UniRef100_UPI00053B470E	PREDICTED: uncharacterized protein LOC104758662
gene_1487|GeneMark.hmm|35_aa|-|1|105	UniRef100_UPI0005BBE1BC	transposase, partial
gene_1488|GeneMark.hmm|188_aa|+|733|1299	UniRef100_UPI0006C85A23	diguanylate cyclase
gene_1495|GeneMark.hmm|634_aa|+|8403|10307	UniRef100_A0A0G3BNJ9	Glucans biosynthesis glucosyltransferase H
gene_1498|GeneMark.hmm|534_aa|+|12762|14366	UniRef100_F5RBG8	Putative nitrate transport system permease protein
gene_1509|GeneMark.hmm|94_aa|+|24112|24396	UniRef100_UPI00036C7415	hypothetical protein
gene_1515|GeneMark.hmm|545_aa|-|34758|36395	UniRef100_UPI00038103DF	hypothetical protein
gene_1517|GeneMark.hmm|33_aa|+|38962|39063	UniRef100_UPI000372F186	hypothetical protein
gene_1521|GeneMark.hmm|88_aa|-|41317|41583	UniRef100_UPI0004AB3A44	PREDICTED: LOW QUALITY PROTEIN: ATP synthase subunit alpha, chloroplastic, partial
gene_1527|GeneMark.hmm|85_aa|-|46868|47125	UniRef100_A0A0T8P5B9	Uncharacterised protein
gene_1528|GeneMark.hmm|221_aa|+|47215|47880	UniRef100_A0A0D5ARB5	Amino acid permease
gene_1529|GeneMark.hmm|404_aa|+|47981|49195	UniRef100_UPI00047F279E	radical SAM protein
gene_1530|GeneMark.hmm|285_aa|+|49366|50223	UniRef100_UPI0003FC538F	D-mannonate oxidoreductase
gene_1531|GeneMark.hmm|67_aa|+|50233|50436	UniRef100_X1C9A0	Uncharacterized protein (Fragment)
gene_1535|GeneMark.hmm|117_aa|-|53668|54021	UniRef100_UPI000369CBE1	hypothetical protein
gene_1536|GeneMark.hmm|206_aa|-|54002|54622	UniRef100_UPI000369CBE1	hypothetical protein
gene_1540|GeneMark.hmm|146_aa|-|195|635	UniRef100_G8QP95	Uncharacterized protein n=2
gene_1543|GeneMark.hmm|193_aa|-|2136|2717	UniRef100_A0A0D8NK30	Uncharacterized protein n=2
gene_1547|GeneMark.hmm|66_aa|+|6423|6623	UniRef100_UPI000375F350	SDR family oxidoreductase
gene_1548|GeneMark.hmm|145_aa|+|6661|7098	UniRef100_UPI000375F350	SDR family oxidoreductase
gene_1554|GeneMark.hmm|652_aa|+|10266|12224	UniRef100_U4KN72	Pectin methylesterase n=2
gene_1555|GeneMark.hmm|248_aa|+|12166|12912	UniRef100_U4KN72	Pectin methylesterase n=2
gene_1558|GeneMark.hmm|225_aa|-|14347|15024	UniRef100_UPI00048E8BF1	patatin
gene_1563|GeneMark.hmm|226_aa|-|20563|21243	UniRef100_UPI000379A4FE	hypothetical protein
gene_1566|GeneMark.hmm|44_aa|-|26310|26444	UniRef100_UPI0004276C31	hypothetical protein
gene_1567|GeneMark.hmm|164_aa|-|26445|26939	UniRef100_C9P6X4	Diguanylate cyclase/phosphodiesterase with PAS/PAC and GAF sensor(S) n=2
gene_1568|GeneMark.hmm|395_aa|-|26903|28090	UniRef100_UPI000407C0C1	hypothetical protein
gene_1569|GeneMark.hmm|381_aa|-|28147|29292	UniRef100_A0A0F2NL52	Uncharacterized protein
gene_1577|GeneMark.hmm|699_aa|+|38722|40821	UniRef100_UPI0006473EAB	exo-poly-galacturonase signal peptide protein
gene_1595|GeneMark.hmm|103_aa|-|1248|1559	UniRef100_D8P9E8	Uncharacterized protein
gene_1598|GeneMark.hmm|64_aa|-|3454|3648	UniRef100_A0A0E9LEK6	Uncharacterized protein n=3
gene_1599|GeneMark.hmm|92_aa|+|3831|4109	UniRef100_A0A0G8AA03	XRE family transcriptional regulator
gene_1600|GeneMark.hmm|178_aa|+|4110|4646	UniRef100_A0A0R0E542	Uncharacterized protein
gene_1601|GeneMark.hmm|89_aa|+|4666|4935	UniRef100_A0A0G8A9Q9	Uncharacterized protein
gene_1602|GeneMark.hmm|227_aa|+|5037|5720	UniRef100_B2FM52	Uncharacterized protein
gene_1603|GeneMark.hmm|271_aa|+|5650|6465	UniRef100_D8P9F4	Uncharacterized protein
gene_1604|GeneMark.hmm|311_aa|+|6480|7415	UniRef100_UPI0006BBDA8B	hypothetical protein
gene_1613|GeneMark.hmm|443_aa|+|12255|13586	UniRef100_I4ML66	Putative DNA primase, phage/plasmid
gene_1622|GeneMark.hmm|45_aa|+|21505|21642	UniRef100_UPI0004295A57	hypothetical protein
gene_1631|GeneMark.hmm|70_aa|+|27180|27392	UniRef100_A0A0G8A9K2	Uncharacterized protein
gene_1634|GeneMark.hmm|58_aa|+|28593|28769	UniRef100_A0A0G8A9P3	Uncharacterized protein
gene_1635|GeneMark.hmm|87_aa|+|28744|29007	UniRef100_UPI0005AA2BFD	hypothetical protein
gene_1636|GeneMark.hmm|113_aa|+|29047|29388	UniRef100_R0DXY1	Uncharacterized protein n=4
gene_1637|GeneMark.hmm|944_aa|+|29391|32225	UniRef100_B9MH00	Phage tape measure protein
gene_1638|GeneMark.hmm|102_aa|+|32277|32585	UniRef100_UPI0006B34DAA	hypothetical protein
gene_1639|GeneMark.hmm|281_aa|+|32552|33397	UniRef100_F4G831	Phage tape measure protein n=3
gene_1643|GeneMark.hmm|326_aa|+|38715|39695	UniRef100_F4G835	Uncharacterized protein n=3
gene_1645|GeneMark.hmm|372_aa|+|40474|41592	UniRef100_UPI0005A923E5	hypothetical protein
gene_1652|GeneMark.hmm|276_aa|-|44044|44874	UniRef100_A0A0G8A9Z5	Uncharacterized protein
gene_1653|GeneMark.hmm|96_aa|+|45028|45318	UniRef100_F4G843	Uncharacterized protein n=3
gene_1655|GeneMark.hmm|33_aa|-|46273|46374	UniRef100_A0A0C9PI35	Uncharacterized protein
gene_1656|GeneMark.hmm|337_aa|+|46660|47673	UniRef100_UPI000561F686	hypothetical protein
gene_1657|GeneMark.hmm|271_aa|+|47760|48575	UniRef100_UPI00048D6F2B	hypothetical protein
gene_1658|GeneMark.hmm|163_aa|+|48634|49125	UniRef100_H8GQ85	Uncharacterized protein
gene_1659|GeneMark.hmm|93_aa|+|49225|49506	UniRef100_UPI0006882A1A	MULTISPECIES: hypothetical protein
gene_1660|GeneMark.hmm|385_aa|-|49616|50773	UniRef100_UPI0005A99262	hypothetical protein
gene_1661|GeneMark.hmm|294_aa|-|50774|51658	UniRef100_A0A0K6I889	Chromosome segregation protein Spo0J, contains ParB-like nuclease domain
gene_1662|GeneMark.hmm|299_aa|-|51655|52554	UniRef100_A0A0A1VGU3	Uncharacterized protein
gene_1663|GeneMark.hmm|506_aa|-|52551|54071	UniRef100_UPI00053ED422	serine recombinase
gene_1664|GeneMark.hmm|149_aa|-|54281|54730	UniRef100_UPI0004534448	hypothetical protein
gene_1667|GeneMark.hmm|165_aa|+|55910|56407	UniRef100_A0A0D6GCL5	Domain of uncharacterised function (DUF3368)
gene_1668|GeneMark.hmm|418_aa|-|53|1309	UniRef100_UPI0006CE79F4	DNA helicase II
gene_1673|GeneMark.hmm|189_aa|+|10960|11529	UniRef100_J3CR28	Putative membrane protein
gene_1685|GeneMark.hmm|32_aa|-|20759|20857	UniRef100_UPI00035CA58A	hypothetical protein
gene_1689|GeneMark.hmm|87_aa|-|23117|23380	UniRef100_UPI0003669AB3	flagellar motor switch protein FliM
gene_1692|GeneMark.hmm|354_aa|-|24844|25908	UniRef100_UPI000382657D	hypothetical protein
gene_1714|GeneMark.hmm|39_aa|+|51508|51627	UniRef100_A0A0S7Z0D7	Carboxymethylenebutenolidase
gene_1717|GeneMark.hmm|375_aa|-|54463|55590	UniRef100_UPI000362474B	hypothetical protein
gene_1719|GeneMark.hmm|54_aa|-|56301|56465	UniRef100_W0SGN2	TRAP dicarboxylate transporter subunit DctP
gene_1739|GeneMark.hmm|79_aa|-|17629|17868	UniRef100_B9TDK8	Putative uncharacterized protein
gene_1740|GeneMark.hmm|415_aa|-|17891|19138	UniRef100_UPI0006BB86EC	hemagglutinin
gene_1741|GeneMark.hmm|111_aa|+|19185|19520	UniRef100_K7QYB1	50S ribosomal protein L10
gene_1743|GeneMark.hmm|445_aa|-|20894|22231	UniRef100_UPI000413C2AC	hypothetical protein
gene_1744|GeneMark.hmm|396_aa|-|22132|23322	UniRef100_UPI000413C2AC	hypothetical protein
gene_1745|GeneMark.hmm|191_aa|-|23557|24132	UniRef100_UPI0004B0CF83	hypothetical protein
gene_1747|GeneMark.hmm|123_aa|+|24607|24978	UniRef100_UPI0006E2FA75	hypothetical protein
gene_1750|GeneMark.hmm|450_aa|-|28733|30085	UniRef100_S9TNM5	Diguanylate cyclase/phosphodiesterase (Fragment)
gene_1757|GeneMark.hmm|315_aa|-|35051|35998	UniRef100_A0A0F2NM35	C4-dicarboxylate ABC transporter
gene_1758|GeneMark.hmm|266_aa|-|36138|36938	UniRef100_A0A080M7T0	Peptidylprolyl isomerase
gene_1759|GeneMark.hmm|854_aa|-|37204|39768	UniRef100_A0A0Q4Y4H1	Beta-glucosidase
gene_1760|GeneMark.hmm|290_aa|+|40083|40955	UniRef100_UPI00036540ED	hypothetical protein
gene_1761|GeneMark.hmm|445_aa|+|40972|42309	UniRef100_UPI0005E8CB4C	glucuronide transporter
gene_1763|GeneMark.hmm|331_aa|-|43467|44462	UniRef100_UPI000466864B	transcriptional regulator
gene_1764|GeneMark.hmm|331_aa|-|44485|45480	UniRef100_A0A0K6H916	ABC-type spermidine/putrescine transport system, permease component II
gene_1765|GeneMark.hmm|294_aa|-|45482|46366	UniRef100_A0A0K2DJW4	ABC transporter permease
gene_1766|GeneMark.hmm|378_aa|-|46568|47704	UniRef100_A0A086MID5	ABC transporter substrate-binding protein
gene_1769|GeneMark.hmm|98_aa|-|49817|50113	UniRef100_A0A075K0Y7	MFS sugar transporter
gene_1770|GeneMark.hmm|233_aa|-|50150|50851	UniRef100_UPI000466A026	MFS sugar transporter
gene_1775|GeneMark.hmm|178_aa|+|54819|55355	UniRef100_A0A060DVI4	2-keto-3-deoxy-galactonokinase
gene_1776|GeneMark.hmm|1462_aa|+|92|4480	UniRef100_UPI000428FD7B	hypothetical protein
gene_1779|GeneMark.hmm|880_aa|+|8738|11380	UniRef100_A0A0A3ZDS9	Uncharacterized protein n=2
gene_1787|GeneMark.hmm|865_aa|-|19247|21844	UniRef100_A0A078KZL0	Blue-light-activated protein
gene_1790|GeneMark.hmm|743_aa|+|24159|26390	UniRef100_J8T1R9	Pectate disaccharide-lyase
gene_1796|GeneMark.hmm|365_aa|+|33638|34735	UniRef100_UPI000400AA3A	hypothetical protein
gene_1811|GeneMark.hmm|76_aa|-|47803|48033	UniRef100_UPI00057E1BD0	hypothetical protein
gene_1812|GeneMark.hmm|118_aa|-|48030|48386	UniRef100_A0A0Q6SSU9	Uncharacterized protein
gene_1813|GeneMark.hmm|235_aa|-|48744|49451	UniRef100_UPI000365CCA7	hypothetical protein
gene_1814|GeneMark.hmm|106_aa|-|49405|49725	UniRef100_UPI000665E2A3	oligogalacturonate lyase
gene_1828|GeneMark.hmm|299_aa|-|10251|11150	UniRef100_UPI0003673A28	hypothetical protein
gene_1829|GeneMark.hmm|94_aa|-|11175|11459	UniRef100_A0A084DJG5	Uncharacterized protein
gene_1830|GeneMark.hmm|69_aa|+|11467|11676	UniRef100_E6PNX5	Uncharacterized protein
gene_1838|GeneMark.hmm|89_aa|-|17709|17978	UniRef100_D5MAN2	50S ribosomal protein L32, chloroplastic
gene_1839|GeneMark.hmm|407_aa|-|18012|19235	UniRef100_UPI0004134B1C	two-component sensor histidine kinase
gene_1860|GeneMark.hmm|61_aa|-|41187|41372	UniRef100_UPI000475B2BF	anthranilate synthase component I
gene_1861|GeneMark.hmm|79_aa|-|41360|41599	UniRef100_UPI000475B2BF	anthranilate synthase component I
gene_1863|GeneMark.hmm|160_aa|-|42580|43062	UniRef100_A0P655	TonB, C-terminal
gene_1870|GeneMark.hmm|122_aa|-|48766|49134	UniRef100_UPI00036B6D5D	glycosyl transferase
gene_1871|GeneMark.hmm|746_aa|-|15|2255	UniRef100_UPI0003649D57	PAS domain-containing sensor histidine kinase
gene_1871|GeneMark.hmm|746_aa|-|15|2255	UniRef100_UPI0003649D57	PAS domain-containing sensor histidine kinase
gene_1871|GeneMark.hmm|746_aa|-|15|2255	UniRef100_UPI0003649D57	PAS domain-containing sensor histidine kinase
gene_1924|GeneMark.hmm|36_aa|-|49668|49778	UniRef100_A0A0Q0Y7X7	Amino acid ABC transporter ATP-binding protein
gene_1926|GeneMark.hmm|158_aa|-|1732|2208	UniRef100_A0A0F3K2Q6	Peptidylprolyl isomerase
gene_1941|GeneMark.hmm|191_aa|-|17481|18056	UniRef100_UPI00068704E6	hypothetical protein
gene_1945|GeneMark.hmm|150_aa|+|21182|21634	UniRef100_W6LUC6	Uncharacterized protein
gene_1946|GeneMark.hmm|84_aa|+|21645|21899	UniRef100_W6LUC6	Uncharacterized protein
gene_1947|GeneMark.hmm|251_aa|+|22203|22958	UniRef100_A0A0C2MNR4	Membrane protein
gene_1956|GeneMark.hmm|60_aa|+|30938|31120	UniRef100_UPI0004BE39BB	hypothetical protein
gene_1960|GeneMark.hmm|868_aa|+|34554|37160	UniRef100_UPI00036F6107	hypothetical protein
gene_1961|GeneMark.hmm|738_aa|+|37153|39369	UniRef100_K9VEV2	Glycosyl transferase group 1
gene_1986|GeneMark.hmm|50_aa|+|16985|17137	UniRef100_A0A059KQJ1	Uncharacterized protein
gene_2002|GeneMark.hmm|488_aa|+|28679|30145	UniRef100_A0A0K8NVR4	GGDEF family protein n=2
gene_2006|GeneMark.hmm|64_aa|-|32617|32811	UniRef100_A0A0F2RS73	Uncharacterized protein
gene_2013|GeneMark.hmm|194_aa|-|40389|40973	UniRef100_A0A085GE72	Pectinesterase
gene_2027|GeneMark.hmm|144_aa|-|10543|10977	UniRef100_G3J235	Putative uncharacterized protein
gene_2042|GeneMark.hmm|965_aa|+|22234|25131	UniRef100_UPI000380FACE	hypothetical protein
gene_2046|GeneMark.hmm|202_aa|-|35920|36528	UniRef100_W9UVD8	Putative acetyltransferase
gene_2050|GeneMark.hmm|252_aa|-|40198|40956	UniRef100_A0A0C5V2Z3	Capsule polysaccharide export protein
gene_2050|GeneMark.hmm|252_aa|-|40198|40956	UniRef100_A0A0C5V2Z3	Capsule polysaccharide export protein
gene_2051|GeneMark.hmm|488_aa|-|40893|42359	UniRef100_UPI00061D2FC5	capsular biosynthesis protein
gene_2051|GeneMark.hmm|488_aa|-|40893|42359	UniRef100_UPI00061D2FC5	capsular biosynthesis protein
gene_2055|GeneMark.hmm|372_aa|-|992|2110	UniRef100_UPI0004760DA2	sodium-translocating pyrophosphatase
gene_2056|GeneMark.hmm|484_aa|-|2111|3565	UniRef100_UPI0004760DA2	sodium-translocating pyrophosphatase
gene_2065|GeneMark.hmm|181_aa|+|12215|12760	UniRef100_UPI000366A369	hypothetical protein
gene_2097|GeneMark.hmm|97_aa|-|41237|41530	UniRef100_UPI00039BAA99	branched chain amino acid ABC transporter substrate-binding protein
gene_2099|GeneMark.hmm|2169_aa|+|141|6650	UniRef100_A0A0Q8BRE1	Uncharacterized protein
gene_2099|GeneMark.hmm|2169_aa|+|141|6650	UniRef100_A0A0Q8BRE1	Uncharacterized protein
gene_2099|GeneMark.hmm|2169_aa|+|141|6650	UniRef100_A0A0Q8BRE1	Uncharacterized protein
gene_2099|GeneMark.hmm|2169_aa|+|141|6650	UniRef100_A0A0Q8BRE1	Uncharacterized protein
gene_2099|GeneMark.hmm|2169_aa|+|141|6650	UniRef100_A0A0Q8BRE1	Uncharacterized protein
gene_2099|GeneMark.hmm|2169_aa|+|141|6650	UniRef100_A0A0Q8BRE1	Uncharacterized protein
gene_2109|GeneMark.hmm|213_aa|-|16883|17524	UniRef100_D8JST7	NAD-dependent epimerase/dehydratase
gene_2117|GeneMark.hmm|446_aa|-|24384|25724	UniRef100_UPI0005625B2E	hypothetical protein
gene_2117|GeneMark.hmm|446_aa|-|24384|25724	UniRef100_UPI0005625B2E	hypothetical protein
gene_2131|GeneMark.hmm|226_aa|-|39927|40607	UniRef100_A0A0F0KHE0	Uncharacterized protein
gene_2140|GeneMark.hmm|33_aa|-|8126|8227	UniRef100_UPI0003635BA1	iron-sulfur cluster assembly scaffold protein NifU
gene_2149|GeneMark.hmm|111_aa|-|13779|14114	UniRef100_V6GT07	TfoX N-terminal domain protein
gene_2158|GeneMark.hmm|129_aa|+|26771|27160	UniRef100_UPI00036B6AE8	hypothetical protein
gene_2159|GeneMark.hmm|151_aa|-|27230|27685	UniRef100_UPI00036A5819	cold-shock protein
gene_2165|GeneMark.hmm|31_aa|-|33820|33915	UniRef100_B9BGT8	Uncharacterized protein (Fragment)
gene_2180|GeneMark.hmm|133_aa|-|10395|10796	UniRef100_G8QGA8	Diguanylate cyclase (GGDEF) domain-containing protein
gene_2181|GeneMark.hmm|64_aa|-|10830|11024	UniRef100_UPI000377019A	hypothetical protein
gene_2182|GeneMark.hmm|376_aa|-|11109|12239	UniRef100_UPI000377019A	hypothetical protein
gene_2184|GeneMark.hmm|61_aa|-|13087|13272	UniRef100_UPI00037D85C3	hypothetical protein
gene_2186|GeneMark.hmm|184_aa|-|13750|14304	UniRef100_UPI000374910F	hypothetical protein
gene_2188|GeneMark.hmm|102_aa|-|15699|16007	UniRef100_UPI00036C4227	hypothetical protein
gene_2196|GeneMark.hmm|65_aa|-|25004|25201	UniRef100_UPI000362FD94	hypothetical protein
gene_2198|GeneMark.hmm|288_aa|-|27397|28263	UniRef100_UPI00035CF289	hypothetical protein
gene_2208|GeneMark.hmm|78_aa|-|37356|37592	UniRef100_UPI00059B0284	hypothetical protein
gene_2209|GeneMark.hmm|177_aa|-|34|567	UniRef100_D2R5Y5	TPR repeat-containing protein
gene_2211|GeneMark.hmm|106_aa|-|1786|2106	UniRef100_A0A0E3BRZ8	Uncharacterized protein n=2
gene_2212|GeneMark.hmm|493_aa|-|2176|3657	UniRef100_F3KNT3	Dihydropyrimidinase
gene_2215|GeneMark.hmm|313_aa|+|5815|6756	UniRef100_F3KNT5	Dihydrodipicolinate synthetase
gene_2217|GeneMark.hmm|237_aa|+|8169|8882	UniRef100_UPI0006D4463A	hypothetical protein
gene_2218|GeneMark.hmm|285_aa|+|8879|9736	UniRef100_Q2KXE3	Amino acid ABC transporter, solute-binding protein
gene_2219|GeneMark.hmm|248_aa|+|9914|10660	UniRef100_A0A0S9M2H8	Ectoine/hydroxyectoine ABC transporter ATP-binding protein EhuA
gene_2220|GeneMark.hmm|228_aa|+|10657|11343	UniRef100_UPI00073A240F	polar amino acid ABC transporter permease
gene_2221|GeneMark.hmm|226_aa|+|11343|12023	UniRef100_UPI0003751C95	Fis family transcriptional regulator
gene_2224|GeneMark.hmm|176_aa|-|14272|14802	UniRef100_A0A080M9T2	N-formylmethionyl-tRNA deformylase
gene_2229|GeneMark.hmm|127_aa|-|19800|20183	UniRef100_A0A0Q6X1Q6	Uncharacterized protein
gene_2243|GeneMark.hmm|44_aa|+|31755|31889	UniRef100_UPI0005764456	PREDICTED: cell cycle checkpoint control protein RAD9A isoform X2 n=2
gene_2245|GeneMark.hmm|120_aa|+|33239|33601	UniRef100_D5CLM3	Uncharacterized protein
gene_2250|GeneMark.hmm|366_aa|+|1806|2906	UniRef100_UPI000364F50E	hypothetical protein
gene_2255|GeneMark.hmm|455_aa|-|6056|7423	UniRef100_UPI000720AE5C	diguanylate cyclase
gene_2261|GeneMark.hmm|66_aa|-|13796|13996	UniRef100_A0A0C4YKY5	Putative calcium binding signal peptide protein
gene_2266|GeneMark.hmm|266_aa|+|20801|21601	UniRef100_A0A0N0XN35	Trehalose 6-phosphate phosphatase
gene_2268|GeneMark.hmm|114_aa|-|22783|23127	UniRef100_K9D7J3	Uncharacterized protein
gene_2271|GeneMark.hmm|103_aa|+|25583|25894	UniRef100_W0SCB9	Putative nuclease
gene_2273|GeneMark.hmm|224_aa|-|26195|26869	UniRef100_UPI00054F9A56	3''''-5'''' exonuclease
gene_2286|GeneMark.hmm|433_aa|+|3820|5121	UniRef100_UPI00048066F6	ABC transporter substrate-binding protein
gene_2288|GeneMark.hmm|294_aa|+|6223|7107	UniRef100_A0A059KJH5	Binding-protein-dependent transport system inner membrane protein
gene_2289|GeneMark.hmm|234_aa|+|7104|7808	UniRef100_K0I2V8	GntR family transcriptional regulator
gene_2290|GeneMark.hmm|244_aa|+|7812|8546	UniRef100_UPI0002E40191	Asp/Glu racemase
gene_2296|GeneMark.hmm|402_aa|+|13026|14234	UniRef100_A0A0S6VRG9	Uncharacterized protein
gene_2298|GeneMark.hmm|124_aa|+|15926|16300	UniRef100_Q12A64	Uncharacterized protein n=2
gene_2300|GeneMark.hmm|204_aa|+|16757|17371	UniRef100_UPI000380EFB9	hypothetical protein
gene_2308|GeneMark.hmm|64_aa|-|22339|22533	UniRef100_UPI000628FB31	hypothetical protein
gene_2311|GeneMark.hmm|212_aa|+|24173|24811	UniRef100_UPI000648E251	hypothetical protein
gene_2315|GeneMark.hmm|253_aa|-|27174|27935	UniRef100_A0A0P9E9A9	Nitrate ABC transporter ATP-binding protein
gene_2318|GeneMark.hmm|343_aa|-|30322|31353	UniRef100_A0A0D0M9U9	ABC transporter substrate-binding protein
gene_2321|GeneMark.hmm|344_aa|+|33479|34513	UniRef100_UPI000344C9AA	hypothetical protein
gene_2319|GeneMark.hmm|269_aa|-|31350|32159	UniRef100_A0A0Q4SP66	Isochorismatase
gene_2324|GeneMark.hmm|148_aa|-|2151|2597	UniRef100_J2KV48	TRAP-type C4-dicarboxylate transport system, small permease component n=2
gene_2338|GeneMark.hmm|66_aa|+|15727|15927	UniRef100_UPI000382EB12	hypothetical protein
gene_2345|GeneMark.hmm|340_aa|+|20176|21198	UniRef100_UPI0004759F86	potassium transporter
gene_2346|GeneMark.hmm|164_aa|+|21189|21683	UniRef100_UPI0004759F86	potassium transporter
gene_2347|GeneMark.hmm|164_aa|+|21653|22147	UniRef100_A1K3K7	Putative glutathione-regulated potassium-efflux system protein
gene_2356|GeneMark.hmm|489_aa|+|29924|31393	UniRef100_UPI00061D3969	polysialic acid transporter
gene_2357|GeneMark.hmm|67_aa|+|31439|31642	UniRef100_UPI00061D3969	polysialic acid transporter
gene_2358|GeneMark.hmm|727_aa|+|31660|33843	UniRef100_UPI00051C5C1E	family 2 glycosyl transferase
gene_2358|GeneMark.hmm|727_aa|+|31660|33843	UniRef100_UPI00051C5C1E	family 2 glycosyl transferase
gene_2359|GeneMark.hmm|79_aa|+|33929|34168	UniRef100_UPI0003364FC4	hypothetical protein
gene_2360|GeneMark.hmm|76_aa|-|59|289	UniRef100_A0A0Q4VCT7	Hydroxyacid dehydrogenase
gene_2364|GeneMark.hmm|180_aa|+|4431|4973	UniRef100_UPI000373CBCF	hypothetical protein
gene_2365|GeneMark.hmm|53_aa|-|5021|5182	UniRef100_A0A0B1P1P1	Putative n amino acid transport system protein
gene_2366|GeneMark.hmm|370_aa|+|5326|6438	UniRef100_UPI000362C280	hypothetical protein
gene_2371|GeneMark.hmm|215_aa|+|10288|10935	UniRef100_UPI00036ADD37	hypothetical protein
gene_2392|GeneMark.hmm|98_aa|+|1|297	UniRef100_H0PX72	Peptide deformylase
gene_2404|GeneMark.hmm|136_aa|+|12363|12773	UniRef100_UPI00037709D9	hypothetical protein
gene_2405|GeneMark.hmm|61_aa|+|12763|12948	UniRef100_UPI00037709D9	hypothetical protein
gene_2407|GeneMark.hmm|60_aa|+|13301|13483	UniRef100_UPI00036CF0E7	hypothetical protein
gene_2411|GeneMark.hmm|207_aa|+|18432|19055	UniRef100_UPI00037E2597	hypothetical protein
gene_2424|GeneMark.hmm|43_aa|-|30649|30780	UniRef100_UPI00048C54F2	uracil transporter
gene_2427|GeneMark.hmm|100_aa|-|134|436	UniRef100_UPI00068780CA	hypothetical protein
gene_2428|GeneMark.hmm|276_aa|+|483|1313	UniRef100_UPI00038254E1	hypothetical protein
gene_2433|GeneMark.hmm|370_aa|-|4068|5180	UniRef100_A0A0A2HVJ3	Uncharacterized protein
gene_2444|GeneMark.hmm|63_aa|-|18316|18507	UniRef100_A0A070CE57	Uncharacterized protein
gene_2455|GeneMark.hmm|85_aa|-|26559|26816	UniRef100_A0A011NMD9	Uncharacterized protein
gene_2456|GeneMark.hmm|72_aa|-|26861|27079	UniRef100_A0A0U0UHA7	Uncharacterised protein
gene_2457|GeneMark.hmm|52_aa|+|27197|27355	UniRef100_UPI0003664B1F	RNA polymerase sigma factor RpoS
gene_2461|GeneMark.hmm|391_aa|+|32131|33306	UniRef100_A0A0Q6WXU2	Uncharacterized protein
gene_2462|GeneMark.hmm|130_aa|+|2|394	UniRef100_UPI000368EB57	GNAT family N-acetyltransferase
gene_2464|GeneMark.hmm|385_aa|-|1461|2618	UniRef100_UPI0006421178	class V aminotransferase
gene_2467|GeneMark.hmm|45_aa|+|3856|3993	UniRef100_I3Y593	Electron transport complex subunit A
gene_2472|GeneMark.hmm|90_aa|+|7077|7349	UniRef100_S6AAF8	UPF0125 protein SCD_n01974
gene_2476|GeneMark.hmm|172_aa|-|11291|11809	UniRef100_UPI00036E9197	hypothetical protein
gene_2477|GeneMark.hmm|97_aa|-|11926|12219	UniRef100_UPI00036E9197	hypothetical protein
gene_2481|GeneMark.hmm|166_aa|-|16212|16712	UniRef100_UPI00068CBFAA	hypothetical protein
gene_2482|GeneMark.hmm|66_aa|-|16987|17187	UniRef100_F5R832	O-acetylhomoserine sulfhydrylase
gene_2487|GeneMark.hmm|354_aa|+|21046|22110	UniRef100_UPI00047FF54A	hypothetical protein
gene_2488|GeneMark.hmm|161_aa|+|22107|22592	UniRef100_UPI00055FE7EB	hypothetical protein
gene_2489|GeneMark.hmm|242_aa|+|22589|23317	UniRef100_UPI00048716E1	hypothetical protein
gene_2496|GeneMark.hmm|286_aa|+|27357|28217	UniRef100_UPI00061D3438	hypothetical protein
gene_2504|GeneMark.hmm|184_aa|+|6652|7206	UniRef100_UPI000673D51B	hypothetical protein
gene_2523|GeneMark.hmm|222_aa|+|26417|27085	UniRef100_UPI000378CBF8	flagellar motor switch protein FliG
gene_2524|GeneMark.hmm|100_aa|+|27119|27421	UniRef100_UPI000378CBF8	flagellar motor switch protein FliG
gene_2532|GeneMark.hmm|167_aa|-|630|1133	UniRef100_UPI0003742B3B	hypothetical protein
gene_2539|GeneMark.hmm|48_aa|-|5455|5601	UniRef100_UPI0006857AFC	guanosine-3'''',5''''-bis(diphosphate) 3''''-pyrophosphohydrolase
gene_2568|GeneMark.hmm|64_aa|+|30732|30926	UniRef100_T2MDF5	Mannosyl-oligosaccharide glucosidase (Fragment) n=2
gene_2569|GeneMark.hmm|195_aa|+|30967|31554	UniRef100_B3PFC8	Pectate lyase, putative, pel1C
gene_2570|GeneMark.hmm|201_aa|-|34|639	UniRef100_A0A0G3GNA9	Restriction endonuclease
gene_2571|GeneMark.hmm|102_aa|+|1022|1330	UniRef100_A0A0K2ZWC7	Uncharacterized protein
gene_2572|GeneMark.hmm|317_aa|+|1334|2287	UniRef100_UPI00066A2AEE	hypothetical protein
gene_2573|GeneMark.hmm|287_aa|-|3021|3884	UniRef100_UPI0003649930	hypothetical protein
gene_2575|GeneMark.hmm|196_aa|+|4780|5370	UniRef100_A0A0M2KRJ7	Alpha/beta hydrolase
gene_2577|GeneMark.hmm|82_aa|+|6604|6852	UniRef100_E8TWB1	Uncharacterized protein
gene_2578|GeneMark.hmm|153_aa|+|6873|7334	UniRef100_UPI00036A25FC	hypothetical protein
gene_2579|GeneMark.hmm|83_aa|-|7598|7849	UniRef100_C1D694	Uncharacterized protein
gene_2592|GeneMark.hmm|102_aa|-|20732|21040	UniRef100_UPI0004D00477	hypothetical protein
gene_2594|GeneMark.hmm|303_aa|-|21944|22855	UniRef100_UPI0002D0CD6D	binding-protein-dependent transporter system inner membrane protein
gene_2596|GeneMark.hmm|286_aa|+|24067|24927	UniRef100_UPI000374D11D	hypothetical protein
gene_2599|GeneMark.hmm|152_aa|+|26636|27094	UniRef100_UPI00069DF5DC	hypothetical protein
gene_2601|GeneMark.hmm|83_aa|-|3|251	UniRef100_UPI00047D1C77	peptide deformylase
gene_2610|GeneMark.hmm|190_aa|+|7682|8254	UniRef100_UPI0007314660	rhomboid family intramembrane serine protease
gene_2629|GeneMark.hmm|143_aa|-|28228|28659	UniRef100_UPI0004D0377F	hypothetical protein
gene_2630|GeneMark.hmm|195_aa|-|28841|29428	UniRef100_E6TT60	Uncharacterized protein
gene_2631|GeneMark.hmm|82_aa|-|29430|29678	UniRef100_U9VRI9	Uncharacterized protein
gene_2636|GeneMark.hmm|52_aa|+|2016|2174	UniRef100_UPI00035D825B	hypothetical protein
gene_2637|GeneMark.hmm|64_aa|+|2175|2369	UniRef100_A0A0A8K7X6	Flagellar L-ring protein
gene_2646|GeneMark.hmm|183_aa|-|9936|10487	UniRef100_UPI000497F026	hypothetical protein
gene_2668|GeneMark.hmm|223_aa|-|22|693	UniRef100_A0A0G4K2S2	L-lysine permease
gene_2669|GeneMark.hmm|107_aa|-|653|976	UniRef100_D3UWI6	Putative amino acid efflux transmembrane protein
gene_2670|GeneMark.hmm|331_aa|+|1161|2156	UniRef100_A0A0G4K3G2	Transcriptional regulator, LysR family
gene_2672|GeneMark.hmm|191_aa|-|4129|4704	UniRef100_UPI00068C8AFF	hypothetical protein
gene_2673|GeneMark.hmm|266_aa|-|4692|5492	UniRef100_UPI000415015B	hypothetical protein
gene_2674|GeneMark.hmm|121_aa|-|5689|6054	UniRef100_UPI0003F6A21B	chemotaxis protein CheY
gene_2675|GeneMark.hmm|806_aa|-|6257|8677	UniRef100_UPI00055073C5	chemotaxis protein CheA
gene_2680|GeneMark.hmm|401_aa|-|11362|12567	UniRef100_A0A0Q8T1Q8	Amidase
gene_2681|GeneMark.hmm|300_aa|-|12575|13477	UniRef100_UPI0005567BE7	polysaccharide deacetylase
gene_2682|GeneMark.hmm|152_aa|-|13474|13932	UniRef100_A0A0Q8T8I9	Uncharacterized protein
gene_2686|GeneMark.hmm|126_aa|+|16858|17238	UniRef100_A6T3R1	Uncharacterized conserved protein
gene_2698|GeneMark.hmm|229_aa|-|53|742	UniRef100_UPI00069885F0	hypothetical protein
gene_2699|GeneMark.hmm|95_aa|+|747|1034	UniRef100_A0A024VSJ1	Uncharacterized protein (Fragment)
gene_2711|GeneMark.hmm|95_aa|-|11416|11703	UniRef100_W9VHE5	Uncharacterized protein
gene_2715|GeneMark.hmm|140_aa|+|13055|13477	UniRef100_W0SML4	HAD family hydrolase n=2
gene_2722|GeneMark.hmm|277_aa|-|18411|19244	UniRef100_A0A061JJS0	Diguanylate cyclase n=2
gene_2723|GeneMark.hmm|66_aa|-|19283|19483	UniRef100_Q2W220	Response regulator containing a CheY-like receiver domain and a GGDEF domain
gene_2725|GeneMark.hmm|300_aa|-|21269|22171	UniRef100_E6QW14	Uncharacterized protein
gene_2729|GeneMark.hmm|474_aa|-|25753|27177	UniRef100_F3LR74	Metallophosphoesterase
gene_2731|GeneMark.hmm|115_aa|+|28225|28572	UniRef100_UPI00068BC4F4	hypothetical protein
gene_2734|GeneMark.hmm|124_aa|+|145|519	UniRef100_UPI00052444C9	esterase
gene_2749|GeneMark.hmm|143_aa|-|14968|15399	UniRef100_I0X8X0	Cupin domain-containing protein
gene_2763|GeneMark.hmm|441_aa|-|27448|28773	UniRef100_G2FJV5	Uncharacterized protein
gene_2764|GeneMark.hmm|491_aa|-|34|1509	UniRef100_UPI00036FC75B	hypothetical protein
gene_2788|GeneMark.hmm|66_aa|-|25448|25648	UniRef100_A0A0C4WHN8	Uncharacterized protein
gene_2790|GeneMark.hmm|149_aa|-|27773|28222	UniRef100_W0E3I7	Uncharacterized protein
gene_2791|GeneMark.hmm|44_aa|-|53|187	UniRef100_A0A0P7LV50	Uncharacterized protein
gene_2792|GeneMark.hmm|219_aa|+|748|1407	UniRef100_Q7NY00	Putative uncharacterized protein
gene_2793|GeneMark.hmm|132_aa|+|1894|2292	UniRef100_A0A0J6KKT4	Uncharacterized protein
gene_2794|GeneMark.hmm|76_aa|+|2292|2522	UniRef100_G1KBE5	Uncharacterized protein
gene_2795|GeneMark.hmm|184_aa|+|2567|3121	UniRef100_A0A0J6KF50	Uncharacterized protein
gene_2796|GeneMark.hmm|97_aa|+|3125|3418	UniRef100_A0A0J6NEV4	Uncharacterized protein
gene_2797|GeneMark.hmm|76_aa|+|3474|3704	UniRef100_A0A0J6NEV4	Uncharacterized protein
gene_2801|GeneMark.hmm|386_aa|-|6937|8097	UniRef100_A0A0S7XHN3	Uncharacterized protein
gene_2804|GeneMark.hmm|153_aa|-|9782|10243	UniRef100_N6YA90	2,5-didehydrogluconate reductase
gene_2805|GeneMark.hmm|139_aa|-|10197|10616	UniRef100_Q1LIS3	Oxidoreductase (2,5-didehydrogluconate reductase)
gene_2807|GeneMark.hmm|175_aa|+|11393|11920	UniRef100_UPI0005A68698	autonomous glycyl radical cofactor GrcA
gene_2812|GeneMark.hmm|128_aa|+|15991|16377	UniRef100_A0A084DL19	Membrane protein
gene_2813|GeneMark.hmm|100_aa|+|16374|16676	UniRef100_UPI0004109026	hypothetical protein
gene_2821|GeneMark.hmm|352_aa|-|21020|22078	UniRef100_UPI0003794B7D	hypothetical protein
gene_2824|GeneMark.hmm|50_aa|-|24123|24275	UniRef100_UPI0005BDEE23	sulfurtransferase tusA
gene_2829|GeneMark.hmm|1123_aa|+|66|3437	UniRef100_UPI00073986F5	hypothetical protein
gene_2829|GeneMark.hmm|1123_aa|+|66|3437	UniRef100_UPI00073986F5	hypothetical protein
gene_2829|GeneMark.hmm|1123_aa|+|66|3437	UniRef100_UPI00073986F5	hypothetical protein
gene_2829|GeneMark.hmm|1123_aa|+|66|3437	UniRef100_UPI00073986F5	hypothetical protein
gene_2829|GeneMark.hmm|1123_aa|+|66|3437	UniRef100_UPI00073986F5	hypothetical protein
gene_2829|GeneMark.hmm|1123_aa|+|66|3437	UniRef100_UPI00073986F5	hypothetical protein
gene_2829|GeneMark.hmm|1123_aa|+|66|3437	UniRef100_UPI00073986F5	hypothetical protein
gene_2829|GeneMark.hmm|1123_aa|+|66|3437	UniRef100_UPI00073986F5	hypothetical protein
gene_2829|GeneMark.hmm|1123_aa|+|66|3437	UniRef100_UPI00073986F5	hypothetical protein
gene_2830|GeneMark.hmm|403_aa|+|3286|4497	UniRef100_A0A0U1PZM8	Uncharacterized protein (Fragment)
gene_2830|GeneMark.hmm|403_aa|+|3286|4497	UniRef100_A0A0U1PZM8	Uncharacterized protein (Fragment)
gene_2830|GeneMark.hmm|403_aa|+|3286|4497	UniRef100_A0A0U1PZM8	Uncharacterized protein (Fragment)
gene_2830|GeneMark.hmm|403_aa|+|3286|4497	UniRef100_A0A0U1PZM8	Uncharacterized protein (Fragment)
gene_2833|GeneMark.hmm|201_aa|+|7584|8189	UniRef100_UPI00044A3A4A	hypothetical protein
gene_2834|GeneMark.hmm|57_aa|+|8186|8359	UniRef100_UPI00044FE92F	hypothetical protein
gene_2835|GeneMark.hmm|413_aa|+|8364|9605	UniRef100_UPI0002EF55FD	helicase
gene_2836|GeneMark.hmm|1242_aa|+|9723|13451	UniRef100_A0A080MBQ4	ATP-dependent DNA helicase RecQ
gene_2846|GeneMark.hmm|443_aa|+|21837|23168	UniRef100_UPI00037DFCA6	hypothetical protein
gene_2846|GeneMark.hmm|443_aa|+|21837|23168	UniRef100_UPI00037DFCA6	hypothetical protein
gene_2853|GeneMark.hmm|400_aa|-|590|1792	UniRef100_UPI0003B9E960	hypothetical protein
gene_2855|GeneMark.hmm|91_aa|-|2424|2699	UniRef100_UPI0005B37FD9	hypothetical protein
gene_2856|GeneMark.hmm|58_aa|+|3435|3611	UniRef100_Q8PKJ5	Uncharacterized protein n=3
gene_2862|GeneMark.hmm|449_aa|-|7084|8433	UniRef100_A0A038JNS4	Site-specific recombinase, phage integrase family
gene_2871|GeneMark.hmm|370_aa|-|15744|16856	UniRef100_G8NPG7	Uncharacterized protein
gene_2876|GeneMark.hmm|632_aa|+|21867|23765	UniRef100_UPI0003655574	hypothetical protein
gene_2879|GeneMark.hmm|84_aa|-|913|1167	UniRef100_A0A071LCF1	Nicotinate phosphoribosyltransferase
gene_2880|GeneMark.hmm|49_aa|+|1166|1315	UniRef100_A0A0J0GR26	Nucleoside-diphosphate sugar epimerase
gene_2881|GeneMark.hmm|168_aa|+|1325|1831	UniRef100_F8GX59	Nucleoside-diphosphate-sugar epimerase YraR n=2
gene_2882|GeneMark.hmm|66_aa|-|1941|2141	UniRef100_A0A095UGD0	Cro/Cl family transcriptional regulator
gene_2883|GeneMark.hmm|136_aa|-|2142|2552	UniRef100_U1ZPT0	Uncharacterized protein
gene_2884|GeneMark.hmm|55_aa|+|2779|2946	UniRef100_UPI000698CAD4	hypothetical protein
gene_2885|GeneMark.hmm|299_aa|+|2974|3873	UniRef100_UPI00056B83C3	hypothetical protein
gene_2887|GeneMark.hmm|96_aa|+|5188|5478	UniRef100_M4UJ70	Transcriptional regulator, GntR family
gene_2889|GeneMark.hmm|250_aa|+|6717|7469	UniRef100_UPI00068662A5	spermidine/putrescine ABC transporter substrate-binding protein
gene_2890|GeneMark.hmm|29_aa|+|7677|7766	UniRef100_UPI00068662A5	spermidine/putrescine ABC transporter substrate-binding protein
gene_2895|GeneMark.hmm|108_aa|-|13166|13492	UniRef100_A0A0S6X6I0	Hypothetical conserved protein
gene_2898|GeneMark.hmm|276_aa|+|15880|16710	UniRef100_UPI0003813871	hypothetical protein
gene_2899|GeneMark.hmm|88_aa|-|17023|17289	UniRef100_UPI00037EE445	hypothetical protein
gene_2900|GeneMark.hmm|220_aa|-|17265|17927	UniRef100_UPI00037EE445	hypothetical protein
gene_2902|GeneMark.hmm|92_aa|+|19118|19396	UniRef100_B9L6B9	Uncharacterized protein
gene_2903|GeneMark.hmm|292_aa|+|19435|20313	UniRef100_UPI00037CC493	hypothetical protein
gene_2907|GeneMark.hmm|122_aa|-|24180|24548	UniRef100_I3YBU1	Molybdenum import ATP-binding protein ModC
gene_2908|GeneMark.hmm|90_aa|+|24754|25026	UniRef100_J8V402	Uncharacterized protein
gene_2909|GeneMark.hmm|132_aa|-|25131|25529	UniRef100_Q47CB8	Molybdate ABC transporter, permease protein
gene_2911|GeneMark.hmm|64_aa|-|110|304	UniRef100_A0A0B4HK64	Ankyrin repeat-containing domain protein (Fragment)
gene_2914|GeneMark.hmm|123_aa|+|1888|2259	UniRef100_D8IV35	Bacteriophage transcription regulator protein
gene_2922|GeneMark.hmm|183_aa|+|8895|9446	UniRef100_UPI0003616781	hypothetical protein
gene_2923|GeneMark.hmm|214_aa|+|9410|10054	UniRef100_UPI0003616781	hypothetical protein
gene_2931|GeneMark.hmm|89_aa|+|15790|16059	UniRef100_UPI0004733039	antibiotic resistance protein
gene_2932|GeneMark.hmm|140_aa|+|16056|16478	UniRef100_F3LTE2	UPF0056 membrane protein
gene_2942|GeneMark.hmm|201_aa|+|24863|25468	UniRef100_A0A0Q6WMH7	Uncharacterized protein
gene_2942|GeneMark.hmm|201_aa|+|24863|25468	UniRef100_A0A0Q6WMH7	Uncharacterized protein
gene_2942|GeneMark.hmm|201_aa|+|24863|25468	UniRef100_A0A0Q6WMH7	Uncharacterized protein
gene_2944|GeneMark.hmm|41_aa|-|3|125	UniRef100_UPI0005B3E481	transposase, partial
gene_2999|GeneMark.hmm|41_aa|-|3|125	UniRef100_UPI0005B3E481	transposase, partial
gene_2954|GeneMark.hmm|537_aa|+|8636|10249	UniRef100_UPI000372501E	hypothetical protein
gene_2955|GeneMark.hmm|297_aa|+|10242|11135	UniRef100_UPI0002CF4458	hypothetical protein
gene_2968|GeneMark.hmm|37_aa|-|22128|22241	UniRef100_F2NT27	Uncharacterized protein
gene_2972|GeneMark.hmm|62_aa|-|25030|25218	UniRef100_A0A0P6XB17	Bifunctional enoyl-CoA hydratase/phosphate acetyltransferase
gene_2988|GeneMark.hmm|485_aa|+|15097|16554	UniRef100_A0A0N1JSD4	Uncharacterized protein
gene_2989|GeneMark.hmm|496_aa|+|16551|18041	UniRef100_UPI00059EB66F	hypothetical protein
gene_2990|GeneMark.hmm|389_aa|+|18109|19278	UniRef100_UPI000645C856	hypothetical protein
gene_2991|GeneMark.hmm|363_aa|+|19275|20366	UniRef100_UPI000648709C	hypothetical protein
gene_2993|GeneMark.hmm|86_aa|-|21657|21917	UniRef100_A6DS30	Prepilin peptidase
gene_3016|GeneMark.hmm|160_aa|+|18334|18816	UniRef100_U6ZQA0	Flagellar protein FlhE
gene_3024|GeneMark.hmm|191_aa|+|731|1306	UniRef100_UPI00048EEFBB	transmembrane protein
gene_3026|GeneMark.hmm|220_aa|+|3333|3995	UniRef100_G0A955	Virulence protein
gene_3035|GeneMark.hmm|170_aa|+|10533|11045	UniRef100_A0A0M0FU22	Ferritin
gene_3036|GeneMark.hmm|124_aa|+|11047|11421	UniRef100_N6ZXS1	Uncharacterized protein
gene_3042|GeneMark.hmm|583_aa|+|16587|18338	UniRef100_UPI000320B7B0	hypothetical protein
gene_3043|GeneMark.hmm|393_aa|-|18361|19542	UniRef100_A0A0P9N8A5	Signal transduction histidine kinase
gene_3044|GeneMark.hmm|391_aa|+|19677|20852	UniRef100_A0A0Q6X9K0	Uncharacterized protein
gene_3046|GeneMark.hmm|45_aa|-|22746|22883	UniRef100_Q5GYZ9	Uncharacterized protein
gene_3503|GeneMark.hmm|45_aa|+|3|140	UniRef100_Q5GYZ9	Uncharacterized protein
gene_3052|GeneMark.hmm|180_aa|-|4900|5442	UniRef100_S9ZEI3	Exodeoxyribonuclease 7 large subunit
gene_3053|GeneMark.hmm|235_aa|-|5382|6089	UniRef100_UPI00036CB81C	exodeoxyribonuclease VII large subunit
gene_3067|GeneMark.hmm|122_aa|+|19187|19555	UniRef100_A0A0F3KIC4	Uncharacterized protein
gene_3069|GeneMark.hmm|68_aa|+|20225|20431	UniRef100_F3KVN1	Uncharacterized protein
gene_3073|GeneMark.hmm|100_aa|+|1961|2263	UniRef100_N6YFU3	Flagellar protein
gene_3074|GeneMark.hmm|37_aa|+|2260|2373	UniRef100_C7RSH2	Flagellar protein FlaG protein
gene_3091|GeneMark.hmm|169_aa|-|16771|17280	UniRef100_C1DE26	MFS transporter n=2
gene_3092|GeneMark.hmm|291_aa|-|17287|18162	UniRef100_A0A0B6S283	Drug resistance transporter, EmrB/QacA subfamily n=2
gene_3099|GeneMark.hmm|328_aa|-|480|1466	UniRef100_UPI000376549B	PAS domain-containing sensor histidine kinase
gene_3100|GeneMark.hmm|612_aa|-|1463|3301	UniRef100_UPI000686BC39	PAS domain-containing sensor histidine kinase
gene_3116|GeneMark.hmm|77_aa|-|21356|21589	UniRef100_UPI0006910DFA	bactoprenol glucosyl transferase
gene_3123|GeneMark.hmm|234_aa|+|6353|7057	UniRef100_UPI00056EDC1F	hypothetical protein
gene_3125|GeneMark.hmm|84_aa|+|10438|10692	UniRef100_UPI0005275E28	hypothetical protein
gene_3126|GeneMark.hmm|187_aa|+|10689|11252	UniRef100_UPI0003662CC3	hypothetical protein
gene_3127|GeneMark.hmm|186_aa|+|11311|11871	UniRef100_UPI0003662CC3	hypothetical protein
gene_3128|GeneMark.hmm|563_aa|+|11858|13549	UniRef100_UPI0003772CA4	hypothetical protein
gene_3129|GeneMark.hmm|99_aa|+|13557|13856	UniRef100_UPI00037534D9	hypothetical protein
gene_3130|GeneMark.hmm|251_aa|+|13894|14649	UniRef100_A0A0Q7LFP2	Uncharacterized protein
gene_3136|GeneMark.hmm|222_aa|-|100|768	UniRef100_UPI00037135D4	hypothetical protein
gene_3138|GeneMark.hmm|213_aa|-|1269|1910	UniRef100_Q1GZY4	CheA signal transduction histidine kinases
gene_3139|GeneMark.hmm|185_aa|-|1919|2476	UniRef100_D9SEV4	CheA signal transduction histidine kinase
gene_3140|GeneMark.hmm|167_aa|-|2705|3208	UniRef100_A0A0E9M3M5	Chemotaxis protein CheA
gene_3142|GeneMark.hmm|287_aa|-|3987|4850	UniRef100_A0A0C1TP57	3-hydroxyisobutyrate dehydrogenase
gene_3143|GeneMark.hmm|83_aa|-|5049|5300	UniRef100_A0A0E0Z0W3	Uncharacterized protein n=3
gene_3153|GeneMark.hmm|33_aa|-|16961|17062	UniRef100_UPI0003F5EA82	HlyD family type I secretion periplasmic adaptor subunit
gene_3157|GeneMark.hmm|32_aa|-|168|266	UniRef100_A5V036	Phosphate butyryltransferase
gene_3159|GeneMark.hmm|63_aa|-|938|1129	UniRef100_F8J7D8	Enoyl-[acyl-carrier-protein] reductase [NADH]
gene_3173|GeneMark.hmm|99_aa|-|12323|12622	UniRef100_UPI0002CFFD90	hypothetical protein
gene_3181|GeneMark.hmm|78_aa|-|168|404	UniRef100_Q5P7U5	5-methylthioadenosine/S-adenosylhomocysteine deaminase
gene_3211|GeneMark.hmm|68_aa|-|11049|11255	UniRef100_A1K7J4	Uncharacterized protein
gene_3218|GeneMark.hmm|384_aa|+|3|1157	UniRef100_UPI000640539C	amino acid permease
gene_3220|GeneMark.hmm|185_aa|+|1912|2469	UniRef100_A0A059KIU7	Uncharacterized protein
gene_3229|GeneMark.hmm|266_aa|+|10780|11580	UniRef100_UPI00041BCE91	ribose and galactose chemoreceptor protein
gene_3230|GeneMark.hmm|291_aa|+|11535|12410	UniRef100_UPI00041E9547	ribose and galactose chemoreceptor protein
gene_3231|GeneMark.hmm|263_aa|+|12478|13269	UniRef100_UPI00068C6DAA	hypothetical protein
gene_3232|GeneMark.hmm|288_aa|+|13266|14132	UniRef100_F1VZM9	Uncharacterized protein
gene_3234|GeneMark.hmm|188_aa|-|15723|16289	UniRef100_A0A0C2KN00	Uncharacterized protein
gene_3240|GeneMark.hmm|193_aa|-|6935|7516	UniRef100_UPI000381EFB4	hypothetical protein
gene_3251|GeneMark.hmm|353_aa|+|723|1784	UniRef100_G8NPG6	Uncharacterized protein
gene_3252|GeneMark.hmm|195_aa|+|1806|2393	UniRef100_UPI00036FB6DA	NAD(P)-dependent oxidoreductase
gene_3257|GeneMark.hmm|246_aa|-|7389|8129	UniRef100_F3KW15	Extracellular solute-binding protein family 1
gene_3259|GeneMark.hmm|368_aa|-|8274|9380	UniRef100_A0A014P3P2	Uncharacterized protein
gene_3260|GeneMark.hmm|256_aa|+|9794|10564	UniRef100_A0A0Q7L5I6	Nitrate ABC transporter substrate-binding protein
gene_3261|GeneMark.hmm|106_aa|+|10503|10823	UniRef100_UPI000300C2F8	nitrate ABC transporter substrate-binding protein
gene_3262|GeneMark.hmm|280_aa|+|10830|11672	UniRef100_A0A0P9DCG9	Sulfonate ABC transporter ATP-binding protein
gene_3263|GeneMark.hmm|289_aa|+|11669|12538	UniRef100_UPI00023769ED	ABC transporter permease
gene_3264|GeneMark.hmm|341_aa|+|12584|13609	UniRef100_A0A0A1VCR1	1-aminocyclopropane-1-carboxylate deaminase
gene_3266|GeneMark.hmm|67_aa|+|14332|14535	UniRef100_UPI0004E7F139	transporter
gene_3267|GeneMark.hmm|189_aa|-|14560|15129	UniRef100_UPI00040694CC	hypothetical protein
gene_3269|GeneMark.hmm|54_aa|+|268|432	UniRef100_A0A0L6T8I8	RND transporter
gene_3273|GeneMark.hmm|1037_aa|-|6047|9160	UniRef100_UPI000424270E	hypothetical protein
gene_3274|GeneMark.hmm|70_aa|+|9305|9517	UniRef100_A0A0D0SCG6	NODE_6, whole genome shotgun sequence
gene_3278|GeneMark.hmm|155_aa|-|12383|12850	UniRef100_B9XEL4	Uncharacterized protein n=2
gene_3284|GeneMark.hmm|94_aa|+|3487|3771	UniRef100_A0A0U1KV01	Uncharacterized protein
gene_3286|GeneMark.hmm|85_aa|+|4861|5118	UniRef100_UPI00031471E0	NADPH-dependent F420 reductase
gene_3287|GeneMark.hmm|126_aa|+|5115|5495	UniRef100_UPI00031471E0	NADPH-dependent F420 reductase
gene_3288|GeneMark.hmm|277_aa|+|5673|6506	UniRef100_T1X6K5	Putative isochorismatase
gene_3292|GeneMark.hmm|109_aa|+|10495|10824	UniRef100_H0BYX0	Putative uncharacterized protein n=2
gene_3296|GeneMark.hmm|196_aa|-|14377|14967	UniRef100_Q12DE4	Transcriptional regulator, RpiR family
gene_3299|GeneMark.hmm|580_aa|+|2798|4540	UniRef100_R9N6F1	Uncharacterized protein
gene_3306|GeneMark.hmm|139_aa|-|12888|13307	UniRef100_UPI00037E4E46	hypothetical protein
gene_3309|GeneMark.hmm|87_aa|-|295|558	UniRef100_C1CV19	Putative ATP-dependent DNA helicase RecQ
gene_3315|GeneMark.hmm|390_aa|+|6486|7658	UniRef100_UPI00064A7EB7	phospholipase
gene_3319|GeneMark.hmm|71_aa|+|11857|12072	UniRef100_A0A0S3NDA4	Uncharacterized protein
gene_3320|GeneMark.hmm|110_aa|-|12057|12389	UniRef100_A0A059KX03	DNA-binding protein
gene_3321|GeneMark.hmm|84_aa|-|12373|12627	UniRef100_A0A095G8M3	Plasmid stabilization system family protein
gene_3326|GeneMark.hmm|150_aa|-|1259|1711	UniRef100_A0A0Q0DNP9	Uncharacterized protein
gene_3330|GeneMark.hmm|33_aa|+|4287|4388	UniRef100_UPI000375706D	hypothetical protein
gene_3334|GeneMark.hmm|489_aa|+|6711|8180	UniRef100_A0A0E3UZY4	TPR repeat protein
gene_3335|GeneMark.hmm|135_aa|+|8230|8637	UniRef100_UPI00046A7F6E	hypothetical protein
gene_3337|GeneMark.hmm|293_aa|-|9765|10646	UniRef100_UPI00035FB634	hypothetical protein
gene_3337|GeneMark.hmm|293_aa|-|9765|10646	UniRef100_UPI00035FB634	hypothetical protein
gene_3337|GeneMark.hmm|293_aa|-|9765|10646	UniRef100_UPI00035FB634	hypothetical protein
gene_3337|GeneMark.hmm|293_aa|-|9765|10646	UniRef100_UPI00035FB634	hypothetical protein
gene_3337|GeneMark.hmm|293_aa|-|9765|10646	UniRef100_UPI00035FB634	hypothetical protein
gene_3337|GeneMark.hmm|293_aa|-|9765|10646	UniRef100_UPI00035FB634	hypothetical protein
gene_3337|GeneMark.hmm|293_aa|-|9765|10646	UniRef100_UPI00035FB634	hypothetical protein
gene_3337|GeneMark.hmm|293_aa|-|9765|10646	UniRef100_UPI00035FB634	hypothetical protein
gene_3337|GeneMark.hmm|293_aa|-|9765|10646	UniRef100_UPI00035FB634	hypothetical protein
gene_3337|GeneMark.hmm|293_aa|-|9765|10646	UniRef100_UPI00035FB634	hypothetical protein
gene_3337|GeneMark.hmm|293_aa|-|9765|10646	UniRef100_UPI00035FB634	hypothetical protein
gene_3340|GeneMark.hmm|73_aa|-|12790|13011	UniRef100_A0A0G9I9B6	CRISPR-associated protein Csy2
gene_3341|GeneMark.hmm|140_aa|-|13032|13454	UniRef100_UPI0004229AE6	type I-F CRISPR-associated protein Csy1
gene_3342|GeneMark.hmm|410_aa|-|329|1561	UniRef100_UPI0004D5E748	hypothetical protein
gene_3354|GeneMark.hmm|74_aa|-|11809|12033	UniRef100_UPI0004856959	hypothetical protein
gene_3355|GeneMark.hmm|437_aa|-|12008|13321	UniRef100_UPI00037D20DB	hypothetical protein
gene_3356|GeneMark.hmm|174_aa|-|306|830	UniRef100_C6C1Y5	Kinase
gene_3359|GeneMark.hmm|168_aa|-|2338|2844	UniRef100_A0A0Q8RHV9	Heat-shock protein
gene_3363|GeneMark.hmm|500_aa|-|5124|6626	UniRef100_A0A0C7N7J3	DNA mismatch repair protein MutS, C-terminal
gene_3364|GeneMark.hmm|513_aa|-|6623|8164	UniRef100_D7BCC0	DNA mismatch repair protein MutS domain protein
gene_3367|GeneMark.hmm|153_aa|-|12013|12474	UniRef100_A0A080M4V6	Uncharacterized protein
gene_3368|GeneMark.hmm|116_aa|+|12506|12856	UniRef100_D5CRB1	Uncharacterized protein
gene_3371|GeneMark.hmm|70_aa|+|799|1011	UniRef100_UPI0004A77CB9	cobalamin synthase
gene_3379|GeneMark.hmm|101_aa|+|7437|7742	UniRef100_UPI00040B5952	hypothetical protein
gene_3381|GeneMark.hmm|234_aa|-|9585|10289	UniRef100_UPI00041130BD	hypothetical protein
gene_3383|GeneMark.hmm|211_aa|+|12287|12922	UniRef100_UPI000467918E	chemotaxis protein
gene_3385|GeneMark.hmm|189_aa|+|84|653	UniRef100_A0A0J8GZY0	Uncharacterized protein
gene_3391|GeneMark.hmm|203_aa|-|5705|6316	UniRef100_UPI00035F7549	hypothetical protein
gene_3392|GeneMark.hmm|214_aa|-|6280|6924	UniRef100_UPI00035F7549	hypothetical protein
gene_3397|GeneMark.hmm|45_aa|-|12699|12836	UniRef100_UPI00048A257C	succinate-semialdehyde dehydrogenase
gene_3400|GeneMark.hmm|91_aa|-|248|523	UniRef100_C6XC64	Uncharacterized protein
gene_3402|GeneMark.hmm|241_aa|+|2113|2838	UniRef100_A0A085FXW6	Coagulation factor 5/8 type domain protein
gene_3403|GeneMark.hmm|522_aa|+|2835|4403	UniRef100_A0A085FXW6	Coagulation factor 5/8 type domain protein
gene_3413|GeneMark.hmm|167_aa|-|11382|11885	UniRef100_A0A0J8T352	Uncharacterized protein
gene_3414|GeneMark.hmm|194_aa|-|3|584	UniRef100_A0A0Q7SIY5	Uncharacterized protein
gene_3415|GeneMark.hmm|324_aa|+|884|1858	UniRef100_UPI00067FC712	ferric anguibactin receptor
gene_3415|GeneMark.hmm|324_aa|+|884|1858	UniRef100_UPI00067FC712	ferric anguibactin receptor
gene_3425|GeneMark.hmm|203_aa|-|10944|11555	UniRef100_W9SWT7	Uncharacterized protein
gene_3426|GeneMark.hmm|29_aa|+|11554|11640	UniRef100_D4SY10	Conjugal transfer trbl transmembrane protein
gene_3438|GeneMark.hmm|199_aa|-|168|767	UniRef100_UPI00042287FC	hypothetical protein
gene_3441|GeneMark.hmm|107_aa|-|3057|3380	UniRef100_G8QKR8	Cation/cationic drug transporter
gene_3442|GeneMark.hmm|99_aa|+|3735|4034	UniRef100_UPI0003FD9080	hypothetical protein
gene_3443|GeneMark.hmm|415_aa|+|4065|5312	UniRef100_A0A0F2Q0H2	Uncharacterized protein
gene_3448|GeneMark.hmm|133_aa|+|1516|1917	UniRef100_Q12GR8	Uncharacterized protein n=2
gene_3449|GeneMark.hmm|60_aa|+|1898|2080	UniRef100_A0A0Q8HB11	Uncharacterized protein n=2
gene_3451|GeneMark.hmm|152_aa|-|4066|4524	UniRef100_UPI00035FADA4	hypothetical protein
gene_3452|GeneMark.hmm|89_aa|-|4576|4845	UniRef100_UPI000510BC01	PREDICTED: uncharacterized protein At1g04910-like isoform X2
gene_3453|GeneMark.hmm|115_aa|-|4842|5189	UniRef100_UPI00036B6992	hypothetical protein
gene_3454|GeneMark.hmm|56_aa|+|5190|5360	UniRef100_UPI00066BB166	lipoprotein
gene_3455|GeneMark.hmm|160_aa|-|5431|5913	UniRef100_UPI00036B6992	hypothetical protein
gene_3456|GeneMark.hmm|484_aa|-|5910|7364	UniRef100_UPI00036E110F	hypothetical protein
gene_3458|GeneMark.hmm|196_aa|-|8495|9085	UniRef100_A0A080NS58	YXWGXW repeat family protein
gene_3462|GeneMark.hmm|349_aa|+|1580|2629	UniRef100_I9S9X9	Uncharacterized protein
gene_3465|GeneMark.hmm|98_aa|+|5856|6152	UniRef100_A0A081VEM3	Uncharacterized protein
gene_3471|GeneMark.hmm|183_aa|+|9193|9744	UniRef100_W0UWQ4	2-dehydropantoate 2-reductase
gene_3473|GeneMark.hmm|221_aa|-|53|718	UniRef100_M4WYC0	Putative glycosyltransferase
gene_3474|GeneMark.hmm|268_aa|-|715|1521	UniRef100_U2ZUY9	Putative glycosyltransferase
gene_3475|GeneMark.hmm|178_aa|-|1808|2344	UniRef100_UPI0003726B6B	hypothetical protein
gene_3476|GeneMark.hmm|464_aa|-|2275|3669	UniRef100_UPI000688E10B	hypothetical protein
gene_3480|GeneMark.hmm|86_aa|+|9093|9353	UniRef100_UPI00037972F1	hypothetical protein
gene_3485|GeneMark.hmm|90_aa|-|4317|4589	UniRef100_A0A0H6U867	Uncharacterised protein
gene_3489|GeneMark.hmm|42_aa|+|6640|6768	UniRef100_UPI0004896573	hypothetical protein
gene_3491|GeneMark.hmm|549_aa|+|7297|8946	UniRef100_UPI00037F2BC4	hypothetical protein
gene_3493|GeneMark.hmm|105_aa|+|171|488	UniRef100_A0A087NS43	Toxin
gene_3494|GeneMark.hmm|211_aa|-|558|1193	UniRef100_A0A0S4K9U1	Uncharacterized protein n=2
gene_3495|GeneMark.hmm|66_aa|-|1341|1541	UniRef100_L0EJM2	Family 31 glycosyl hydrolase, alpha-glucosidase
gene_3499|GeneMark.hmm|167_aa|-|5944|6447	UniRef100_W9HAY1	Uncharacterized protein
gene_3501|GeneMark.hmm|212_aa|-|7603|8241	UniRef100_A0A0P0EQH1	2-dehydro-3-deoxy-6-phosphogalactonate aldolase
gene_3502|GeneMark.hmm|152_aa|-|8238|8696	UniRef100_A0A0D2W4Q9	2-keto-3-deoxy-galactonokinase
gene_3506|GeneMark.hmm|297_aa|+|3402|4295	UniRef100_UPI0002471CFC	LysR family transcriptional regulator
gene_3513|GeneMark.hmm|230_aa|-|3559|4251	UniRef100_UPI000374228A	hypothetical protein
gene_3514|GeneMark.hmm|240_aa|+|4550|5272	UniRef100_L8MY08	GCN5-related N-acetyltransferase
gene_3518|GeneMark.hmm|236_aa|-|7599|8309	UniRef100_UPI0003FF5357	hypothetical protein
gene_3521|GeneMark.hmm|316_aa|+|1615|2565	UniRef100_UPI00036442EB	hypothetical protein
gene_3532|GeneMark.hmm|48_aa|+|4933|5079	UniRef100_H0PXZ4	Glutaredoxin n=2
gene_3533|GeneMark.hmm|42_aa|+|5079|5207	UniRef100_A0A0K6IWS7	Glutaredoxin, GrxC family n=2
gene_3541|GeneMark.hmm|146_aa|-|5304|5744	UniRef100_UPI0003676A57	acyl-[ACP]--phospholipid O-acyltransferase
gene_3542|GeneMark.hmm|158_aa|-|5759|6235	UniRef100_A0A0K1J0N1	Bifunctional protein Aas
gene_3544|GeneMark.hmm|133_aa|+|3|404	UniRef100_UPI0005BBE1BC	transposase, partial
gene_3546|GeneMark.hmm|129_aa|-|1563|1952	UniRef100_UPI00036C0205	hypothetical protein
gene_3547|GeneMark.hmm|71_aa|-|1953|2168	UniRef100_UPI00036C0205	hypothetical protein
gene_3553|GeneMark.hmm|194_aa|-|7195|7779	UniRef100_UPI00042A6265	threonine-phosphate decarboxylase
gene_3554|GeneMark.hmm|83_aa|-|15|266	UniRef100_UPI00036B2E4B	hypothetical protein
gene_3563|GeneMark.hmm|251_aa|-|6783|7538	UniRef100_UPI00069885F0	hypothetical protein
gene_3566|GeneMark.hmm|135_aa|-|971|1378	UniRef100_UPI00028A168E	hypothetical protein
gene_3566|GeneMark.hmm|135_aa|-|971|1378	UniRef100_UPI00028A168E	hypothetical protein
gene_3570|GeneMark.hmm|124_aa|-|2688|3062	UniRef100_UPI00035ECE34	hypothetical protein
gene_3571|GeneMark.hmm|215_aa|-|3105|3752	UniRef100_C7RK66	Acyltransferase 3
gene_3572|GeneMark.hmm|532_aa|-|3801|5399	UniRef100_V4NFH8	Uncharacterized protein
gene_3574|GeneMark.hmm|35_aa|-|7543|7650	UniRef100_UPI0004221A71	porin
gene_3578|GeneMark.hmm|130_aa|-|7213|7605	UniRef100_UPI00036B3246	hypothetical protein
gene_3579|GeneMark.hmm|172_aa|-|2|517	UniRef100_UPI0006A95A99	hypothetical protein
gene_3582|GeneMark.hmm|328_aa|-|1285|2271	UniRef100_UPI0005B39284	hypothetical protein
gene_3586|GeneMark.hmm|84_aa|-|5691|5945	UniRef100_UPI0002F67234	hypothetical protein
gene_3587|GeneMark.hmm|107_aa|-|5929|6252	UniRef100_UPI0002F91C83	hypothetical protein
gene_3588|GeneMark.hmm|92_aa|-|6249|6527	UniRef100_UPI00003C35F3	lipid transporter ATP-binding/permease
gene_3589|GeneMark.hmm|134_aa|-|6791|7195	UniRef100_UPI000374278D	hypothetical protein
gene_3592|GeneMark.hmm|67_aa|+|1395|1598	UniRef100_B8GTB4	Uncharacterized protein
gene_3593|GeneMark.hmm|171_aa|+|1595|2110	UniRef100_I7ZG57	Uncharacterized protein
gene_3594|GeneMark.hmm|269_aa|+|2500|3309	UniRef100_UPI000688CB53	porin
gene_3597|GeneMark.hmm|70_aa|+|67|279	UniRef100_F2LFE6	Uncharacterized protein
gene_3603|GeneMark.hmm|124_aa|-|5285|5659	UniRef100_A0A0K2MYU1	Conjugal transfer protein TrbL
gene_3605|GeneMark.hmm|894_aa|-|293|2977	UniRef100_UPI00035FF2E0	hypothetical protein
gene_3605|GeneMark.hmm|894_aa|-|293|2977	UniRef100_UPI00035FF2E0	hypothetical protein
gene_3605|GeneMark.hmm|894_aa|-|293|2977	UniRef100_UPI00035FF2E0	hypothetical protein
gene_3605|GeneMark.hmm|894_aa|-|293|2977	UniRef100_UPI00035FF2E0	hypothetical protein
gene_3606|GeneMark.hmm|672_aa|-|3081|5099	UniRef100_UPI000557E595	hypothetical protein
gene_3608|GeneMark.hmm|205_aa|-|149|766	UniRef100_A0A085EUQ6	Multi-sensor signal transduction histidine kinase n=2
gene_3609|GeneMark.hmm|104_aa|-|763|1077	UniRef100_UPI00073F7DEF	hypothetical protein
gene_3610|GeneMark.hmm|169_aa|-|1254|1763	UniRef100_UPI0003731E5D	hypothetical protein
gene_3625|GeneMark.hmm|119_aa|+|212|571	UniRef100_J1Q3L3	Uncharacterized protein
gene_3626|GeneMark.hmm|460_aa|+|564|1946	UniRef100_UPI00037F2BC4	hypothetical protein
gene_3629|GeneMark.hmm|165_aa|+|3581|4078	UniRef100_UPI00037E5452	hypothetical protein
gene_3630|GeneMark.hmm|97_aa|+|4093|4386	UniRef100_UPI0004CED362	type II secretion pathway component
gene_3634|GeneMark.hmm|399_aa|-|3072|4271	UniRef100_UPI000697916A	hypothetical protein
gene_3643|GeneMark.hmm|77_aa|+|2386|2619	UniRef100_UPI0005A1C753	hypothetical protein
gene_3646|GeneMark.hmm|158_aa|-|2|475	UniRef100_A0A0E9M8N6	Uncharacterized protein
gene_3651|GeneMark.hmm|64_aa|+|3186|3377	UniRef100_D5CLA4	D12 class N6 adenine-specific DNA methyltransferase
gene_3652|GeneMark.hmm|140_aa|-|1|420	UniRef100_A0A0E9M7X3	Phage virion morphogenesis family protein
gene_3653|GeneMark.hmm|425_aa|-|505|1782	UniRef100_D8NGK3	Putative Mu-like prophage FluMu F protein
gene_3654|GeneMark.hmm|68_aa|-|1784|1990	UniRef100_A0A0M2T6V2	Uncharacterized protein
gene_3655|GeneMark.hmm|285_aa|-|1987|2844	UniRef100_UPI00067A9B63	hypothetical protein
gene_3656|GeneMark.hmm|155_aa|-|2810|3277	UniRef100_D8NGK6	Phage protein
gene_3658|GeneMark.hmm|166_aa|+|739|1239	UniRef100_UPI00054CF4E1	reverse transcriptase
gene_3659|GeneMark.hmm|286_aa|+|1236|2096	UniRef100_UPI0006488585	hypothetical protein
gene_3660|GeneMark.hmm|112_aa|+|2093|2431	UniRef100_A0A0M7MKB9	Uncharacterised protein
gene_3661|GeneMark.hmm|51_aa|+|2424|2579	UniRef100_F8EG04	Uncharacterized protein
gene_3662|GeneMark.hmm|63_aa|+|2695|2886	UniRef100_A0A0S4LK40	Uncharacterized protein
gene_3663|GeneMark.hmm|101_aa|+|1|306	UniRef100_A0A0Q5C4Q3	Amino acid ABC transporter substrate-binding protein
gene_3664|GeneMark.hmm|138_aa|+|310|726	UniRef100_A0A0Q4YSE4	Amino acid ABC transporter substrate-binding protein
gene_3667|GeneMark.hmm|220_aa|-|2154|2816	UniRef100_N6YR38	Proline/glycine betaine ABC transporter periplasmic protein
gene_3668|GeneMark.hmm|31_aa|+|2808|2900	UniRef100_I4MRF5	ABC transporter
gene_3669|GeneMark.hmm|94_aa|+|30|314	UniRef100_UPI0003649D57	PAS domain-containing sensor histidine kinase
gene_3672|GeneMark.hmm|104_aa|+|2478|2792	UniRef100_UPI00041A3C4C	hypothetical protein
gene_3674|GeneMark.hmm|113_aa|+|2504|2845	UniRef100_A0A0A6FH55	Bactoprenol glucosyl transferase
gene_3676|GeneMark.hmm|179_aa|+|152|691	UniRef100_UPI00036FC75B	hypothetical protein
gene_3680|GeneMark.hmm|75_aa|-|53|280	UniRef100_UPI00067CBFF6	multidrug ABC transporter ATP-binding protein
gene_3681|GeneMark.hmm|375_aa|+|610|1737	UniRef100_UPI000529C740	hypothetical protein, partial
gene_3682|GeneMark.hmm|180_aa|-|1945|2487	UniRef100_A0A0K2GFA2	Uncharacterized protein
gene_3682|GeneMark.hmm|180_aa|-|1945|2487	UniRef100_A0A0K2GFA2	Uncharacterized protein
gene_3682|GeneMark.hmm|180_aa|-|1945|2487	UniRef100_A0A0K2GFA2	Uncharacterized protein
gene_3686|GeneMark.hmm|89_aa|-|2058|2327	UniRef100_A0A076PN70	Diguanylate phosphodiesterase n=2
gene_3688|GeneMark.hmm|106_aa|+|1519|1839	UniRef100_UPI00052EDF90	PREDICTED: uncharacterized membrane protein At1g16860-like isoform X1 n=2
gene_3690|GeneMark.hmm|480_aa|-|143|1585	UniRef100_E6PKA3	Uncharacterized protein
gene_3692|GeneMark.hmm|96_aa|+|175|465	UniRef100_UPI00037972F1	hypothetical protein
gene_3694|GeneMark.hmm|145_aa|-|1|435	UniRef100_UPI00036B3246	hypothetical protein
